# Supplementary material for: Identification of an episignature for CHD3-related Snijders Blok-Campeau syndrome reveals heterogeneity in the CHARGE syndrome episignature: towards a better characterization of chromatinopathies.
Source: Research Square preprint supplement (doi:10.21203/rs.3.rs-6706576/v1), 2025-05-26
Supplement: Supplementary file 1 [file 0cb6e2afbf166851664367f7.xlsx]

## Sheet: Sheet 1
	2A : GO term probes ans Venn diagram
	2B : probes for CHD3 (ACP + heatmap + SVM CHD3 atypicals + VUS)
	2C : SVM probes (controls et CHD3 typicals)
	2D : DMR

## Sheet: 2A
Name	probe	TE_fixed	seTE_fixed	zval_fixed	pval_fixed	fdr.BY	IlmnID	AddressA_ID	AlleleA_ProbeSeq	AddressB_ID	AlleleB_ProbeSeq	Next_Base	Color_Channel	col	Probe_Type	Strand_FR	Strand_TB	Strand_CO	Infinium_Design	Infinium_Design_Type	CHR	MAPINFO	Species	Genome_Build	Source_Seq	Forward_Sequence	Top_Sequence	Rep_Num	UCSC_RefGene_Group	UCSC_RefGene_Name	UCSC_RefGene_Accession	UCSC_CpG_Islands_Name	Relation_to_UCSC_CpG_Island	GencodeV41_Group	GencodeV41_Name	GencodeV41_Accession	Phantom5_Enhancers	HMM_Island	Regulatory_Feature_Name	Regulatory_Feature_Group	450k_Enhancer	DMR	DNase_Hypersensitivity_NAME	Encode_CisReg_Site	Encode_CisReg_Site_Evid	OpenChromatin_NAME	OpenChromatin_Evidence_Count	Methyl450_Loci	Methyl27_Loci
cg00009167	cg00009167	-0.0164015	0.00344576	-4.7599	1.93686e-06	0.013668	cg00009167_TC21	15652176	CRAAAATTTATTAACTAACTTAAAAAATACTTCCACTATATTCTTCACAC						cg	F	T	C	2	II	1	109113811	Human	GRCh38	CGTGTGAAGAACACAGTGGAAGCATCCTCCAAGCCAGCCAACAAATTTCC	GCAGTAGAAAACGGAAATTTGTTGGCTGGCTTGGAGGATGCTTCCACTGTGTTCTTCACA[CG]AGCCCCGGGCCTGCCTGTTGGGCCGGTTGCGCACCCCGGGCGCGCGCTCTCCCGCGCCCA	GCAGTAGAAAACGGAAATTTGTTGGCTGGCTTGGAGGATGCTTCCACTGTGTTCTTCACA[CG]AGCCCCGGGCCTGCCTGTTGGGCCGGTTGCGCACCCCGGGCGCGCGCTCTCCCGCGCCCA	1	exon_1;5UTR;exon_1;5UTR;exon_1;5UTR;exon_1;TSS1500;TSS1500;TSS1500;TSS1500;TSS1500;TSS1500	CFAP276;CFAP276;CFAP276;CFAP276;CFAP276;CFAP276;CFAP276;ELAPOR1;ELAPOR1;ELAPOR1;CFAP276;CFAP276;CFAP276	NM_001122961.3;NM_001122961.3;NM_001366200.3;NM_001366200.3;NM_001366202.3;NM_001366202.3;NR_158762.3;NM_001284352.2;NM_001267048.2;NM_020775.5;NM_001245025.3;NM_001366201.3;NR_158763.3	chr1:109113473-109113716	S_Shore	exon_1;exon_1;exon_1;exon_1;5UTR;5UTR;5UTR;TSS1500;TSS1500;TSS1500;TSS200;TSS200;TSS200;TSS1500;TSS1500;TSS1500;TSS1500;TSS1500	CFAP276;CFAP276;CFAP276;ELAPOR1;CFAP276;CFAP276;ELAPOR1;ENSG00000179902.13;ENSG00000179902.13;ENSG00000179902.13;ENSG00000116299.17;ENSG00000116299.17;ENSG00000116299.17;ENSG00000116299.17;ENSG00000116299.17;ENSG00000116299.17;ENSG00000116299.17;ENSG00000116299.17	ENST00000462402.5;ENST00000369949.8;ENST00000369942.2;ENST00000533147.5;ENST00000369949.8;ENST00000462402.5;ENST00000533147.5;ENST00000369948.8;ENST00000369945.7;ENST00000460065.2;ENST00000531664.5;ENST00000534476.5;ENST00000526264.5;ENST00000457623.6;ENST00000369939.8;ENST00000529753.5;ENST00000527996.5;ENST00000490758.6			1:109656064-109657490	Promoter_Associated	TRUE					Quies;TssBiv;TssA;EnhA2;TssFlnkD;EnhBiv;TssFlnkU;TxWk;ReprPCWk;EnhWk;TssFlnk;ReprPC;EnhA1;Tx	741;614;22;6;51;31;16;42;8;55;37;33;6;1	cg00009167
cg00015664	cg00015664	-0.0490118	0.010463	-4.68431	2.80906e-06	0.017279	cg00015664_BC21	86725827	TAAAAATAAAACCAAAAAAACACCCCACTAATTCATAACRCAATTTCCTC						cg	F	B	C	2	II	9	137761203	Human	GRCh38	GGGAGTAAAGCCAGGAAAACACCCCACTGGTTCATGACGCAGTTTCCTCG	TAGGGTGAACGTGGGAGTAAAGCCAGGAAAACACCCCACTGGTTCATGACGCAGTTTCCT[CG]TTTGTTCTGTCCCTGCTGGAAAGTCCCTAGTTCTAGAGATTGGTTGGCTGCTTCTGAATG	CATTCAGAAGCAGCCAACCAATCTCTAGAACTAGGGACTTTCCAGCAGGGACAGAACAAA[CG]AGGAAACTGCGTCATGAACCAGTGGGGTGTTTTCCTGGCTTTACTCCCACGTTCACCCTA	1									chr9:137761126-137761341		9:140654560-140656256	Gene_Associated	TRUE		EH38D4254191	EH38E2738313|dELS;EH38E2738313|DNase-only;EH38E2738313|Low-DNase	2;2;83	Quies;ReprPC;TxWk;Tx;Het;EnhA1;EnhG1;ReprPCWk;EnhWk;EnhG2;EnhA2;ZNF/Rpts;TssFlnkU;EnhBiv	550;12;564;142;24;39;51;182;22;22;47;5;2;1
cg00016778	cg00016778	-0.0257486	0.00595902	-4.32095	1.55357e-05	0.0488439	cg00016778_TC21	51770822	TAATATTTACCTCAATAAACTCTTACTTACTATAAACCAAACAAAACCTC						cg	F	T	C	2	II	14	53539642	Human	GRCh38	CGAGGTCTTGCTTGGCCCACAGTAAGCAAGAGTCCATTGAGGCAAACACT	TGTGTAGTATTTAGTGTTTGCCTCAATGGACTCTTGCTTACTGTGGGCCAAGCAAGACCT[CG]CAGGATTCAGGCTCACCATTGCAAATTGGCCAGCAGGTGTCACTGTGGGTTTGGGTGGTA	TGTGTAGTATTTAGTGTTTGCCTCAATGGACTCTTGCTTACTGTGGGCCAAGCAAGACCT[CG]CAGGATTCAGGCTCACCATTGCAAATTGGCCAGCAGGTGTCACTGTGGGTTTGGGTGGTA	1											14:54005891-54007240	Unclassified	TRUE		EH38D2719540	EH38E1714831|CTCF-only/CTCF-bound;EH38E1714831|dELS/CTCF-bound;EH38E1714831|Low-DNase	60;8;19	Quies;TxWk;EnhA2;EnhWk;Tx;ReprPCWk;EnhA1	1145;383;63;23;32;2;15
cg00029229	cg00029229	-0.0395673	0.00834401	-4.742	2.11623e-06	0.0145265	cg00029229_TC21	3810583	ACTCCCCTATTACATATCTCTCTTACTACAACACACTATACCACAAATAC						cg	F	T	C	2	II	3	40681399	Human	GRCh38	CGTTTTTACATGTCTACTTGTCACAATTTGCCCTTTTGCTCATTCTCAGA	GACACAGCCCCTTCTGAGAATGAGCAAAAGGGCAAATTGTGACAAGTAGACATGTAAAAA[CG]TATCTGTGGCATAGTGTGTTGTAGTAAGAGAGATATGTAACAGGGGAGCTCCCAGTCTCA	GACACAGCCCCTTCTGAGAATGAGCAAAAGGGCAAATTGTGACAAGTAGACATGTAAAAA[CG]TATCTGTGGCATAGTGTGTTGTAGTAAGAGAGATATGTAACAGGGGAGCTCCCAGTCTCA	1													FALSE		EH38D3417159	EH38E2194389|Low-DNase	87	Quies;Het;ReprPCWk;EnhWk;EnhA2;EnhA1;TxWk;ZNF/Rpts;ReprPC;TssFlnkU	1536;56;37;20;4;1;4;3;1;1
cg00029812	cg00029812	-0.023365	0.00527853	-4.42642	9.58116e-06	0.0366044	cg00029812_BC21	33715450	AAAATATACCTTAATCAAAACCCRCTACTAATAACTACTCAAATAACTAC						cg	F	B	C	2	II	17	41930114	Human	GRCh38	GAATATGCCTTGGTCAAGGCCCGCTACTAGTAGCTGCTCAAATAACTGCG	GGAAGGACGTCAGAATATGCCTTGGTCAAGGCCCGCTACTAGTAGCTGCTCAAATAACTG[CG]TTAAATTATGTTGAACCCAACGTTATTTTCCATGTTTTCTTATGCAAATCCTCGCATCCC	GGGATGCGAGGATTTGCATAAGAAAACATGGAAAATAACGTTGGGTTCAACATAATTTAA[CG]CAGTTATTTGAGCAGCTACTAGTAGCGGGCCTTGACCAAGGCATATTCTGACGTCCTTCC	1	TSS1500;TSS1500;TSS1500;TSS1500;TSS1500	ODAD4;ODAD4;ODAD4;ODAD4;ODAD4	NM_001350319.2;NM_031421.5;NR_110662.3;NR_146621.2;NR_146622.2	chr17:41930498-41930845	N_Shore	TSS1500;TSS1500;TSS1500	ENSG00000204815.10;ENSG00000204815.10;ENSG00000204815.10	ENST00000377540.6;ENST00000593239.5;ENST00000591658.5			17:40086180-40087180	Promoter_Associated	TRUE					ReprPCWk;ReprPC;TssFlnkU;Quies;TssA;TssFlnk;EnhWk;EnhBiv;EnhA1;EnhA2;TssFlnkD;TxWk;EnhG1;Het	325;201;632;281;145;24;3;8;7;18;7;9;2;1
cg00032703	cg00032703	-0.028206	0.00508489	-5.54702	2.90575e-08	0.00110389	cg00032703_BC21	5620146	AATCACCCTTACAAACTTCAATCCACACAAAACTCTCTCTTTCTAATCTC						cg	R	B	C	2	II	11	102458783	Human	GRCh38	GTCACCCTTACAAACTTCAGTCCACACAGAACTCTCTCTTTCTGATCTCG	AAAACAAAAAAATAAGCAGAGAACAATGAACTCTGATGCAATTGGATTTTCCTCTTGAAA[CG]AGATCAGAAAGAGAGAGTTCTGTGTGGACTGAAGTTTGTAAGGGTGACTTCTCAGAAAGG	AAAACAAAAAAATAAGCAGAGAACAATGAACTCTGATGCAATTGGATTTTCCTCTTGAAA[CG]AGATCAGAAAGAGAGAGTTCTGTGTGGACTGAAGTTTGTAAGGGTGACTTCTCAGAAAGG	1													FALSE		EH38D2489983	EH38E1565182|dELS;EH38E1565182|Low-DNase	1;86	Quies;TxWk;EnhWk;Het;ZNF/Rpts;EnhA2;ReprPCWk;EnhA1	1461;72;44;31;11;20;16;8
cg00037671	cg00037671	-0.0454677	0.00894885	-5.08084	3.75767e-07	0.00525897	cg00037671_TC21	85783574	CCCTACAATCACTATATAACTAAACCTAAACTAACCTACTACATAACCAC						cg	R	T	C	2	II	20	4089909	Human	GRCh38	CGTGGCCATGCAGCAGGCTAGTCTAGGCTTAGTCACATAGTGATTGCAGG	TATTATTTCTCTAGGCTTTTGCAATCAGATGCTGGGTTGGCTGGAAGCTGGCTGGTATAG[CG]TGGCCATGCAGCAGGCTAGTCTAGGCTTAGTCACATAGTGATTGCAGGGTTTCAGGAAAA	TTTTCCTGAAACCCTGCAATCACTATGTGACTAAGCCTAGACTAGCCTGCTGCATGGCCA[CG]CTATACCAGCCAGCTTCCAGCCAACCCAGCATCTGATTGCAAAAGCCTAGAGAAATAATA	1									chr20:4089811-4090023				FALSE		EH38D5305751	EH38E3417499|dELS;EH38E3417499|DNase-only;EH38E3417499|Low-DNase	5;1;81	EnhWk;EnhA2;Quies;TxWk;EnhA1;EnhBiv;ReprPCWk;ReprPC;TssFlnkD;Het;TssFlnkU	110;25;847;377;172;8;111;10;1;1;1
cg00040423	cg00040423	-0.0167417	0.00363354	-4.60753	4.07478e-06	0.0218388	cg00040423_TC21	9614532	TAAAAAAAACAAACCTTAACTCTCACCCAATTAACAAACRTTTATCCAAC						cg	F	T	C	2	II	6	30326174	Human	GRCh38	CGCTGGATAAACGCTTGTTAACTGGGTGAGAGCCAAGGCCTGTTCTTTCC	AGCCCCAGAAGTGGAAAGAACAGGCCTTGGCTCTCACCCAGTTAACAAGCGTTTATCCAG[CG]CACGTGTTGCGGTCGGACCCCATGCGAAGGAGCTAAGGACACAAAGGTGAGCAGCAGAGA	AGCCCCAGAAGTGGAAAGAACAGGCCTTGGCTCTCACCCAGTTAACAAGCGTTTATCCAG[CG]CACGTGTTGCGGTCGGACCCCATGCGAAGGAGCTAAGGACACAAAGGTGAGCAGCAGAGA	1	TSS1500;TSS1500;TSS1500;TSS1500;TSS200;exon_1;TSS1500	TRIM39;TRIM39;TRIM39;TRIM39;HCG17;HCG18;TRIM39	NM_001369521.2_7;NM_001369522.1_7;NM_021253.4_7;NM_001369523.1_7;NR_052012.1_6;NR_102327.1_7;NM_172016.2_7	chr6:30326392-30327294	N_Shore	exon_1;exon_1;exon_2;exon_1;exon_1;exon_1;exon_1;exon_1;exon_1;exon_1;exon_1;TSS200;TSS200;TSS1500;TSS1500;TSS1500;TSS1500;TSS1500;TSS1500;TSS1500;exon_1;TSS1500;TSS1500	HCG18;HCG18;HCG18;HCG18;HCG18;HCG18;HCG18;HCG18;HCG18;HCG18;HCG18;ENSG00000270604.5;ENSG00000231074.11;ENSG00000204599.16;ENSG00000204599.16;ENSG00000204599.16;ENSG00000204599.16;ENSG00000204599.16;ENSG00000204599.16;ENSG00000204599.16;HCG18;ENSG00000204599.16;ENSG00000204599.16	ENST00000669374.1;ENST00000670071.1;ENST00000654915.1;ENST00000668974.1;ENST00000687430.1;ENST00000602550.6;ENST00000454269.7;ENST00000449544.6;ENST00000444126.5;ENST00000454129.5;ENST00000687471.1;ENST00000453558.1;ENST00000602498.1;ENST00000458516.5;ENST00000440271.5;ENST00000376656.8;ENST00000428728.5;ENST00000396548.5;ENST00000396551.9;ENST00000428404.5;ENST00000664861.1;ENST00000376659.9;ENS…					FALSE		EH38D5742089	EH38E3699685|Low-DNase;EH38E3699685|PLS	10;77	TssBiv;ReprPC;TssA;TssFlnkU;EnhBiv;TssFlnk;ReprPCWk;Quies;Het;EnhA1	349;308;602;231;104;20;30;16;2;1	cg00040423
cg00045016	cg00045016	-0.0548137	0.0113104	-4.84629	1.25788e-06	0.0103896	cg00045016_TC21	16803382	TATTTTTTTAAATATACCTTTACCTTCAATACCTCCTTTAACACCTAATC						cg	R	T	C	2	II	12	53453730	Human	GRCh38	CGATTAGGTGCTAAAGGAGGTATTGAAGGCAAAGGCATATCCAAAAAAAC	TACTTAAAATGTCATTGGGGACATTCTACAACTTGGGAGAGGTCCTTTCTAAAGCTGTTA[CG]ATTAGGTGCTAAAGGAGGTATTGAAGGCAAAGGCATATCCAAAAAAACAAATTTTCTTTC	GAAAGAAAATTTGTTTTTTTGGATATGCCTTTGCCTTCAATACCTCCTTTAGCACCTAAT[CG]TAACAGCTTTAGAAAGGACCTCTCCCAAGTTGTAGAATGTCCCCAATGACATTTTAAGTA	1				chr12:53451884-53452094;chr12:53452360-53452822	S_Shore;S_Shore	TSS1500;TSS1500;TSS1500;TSS1500;TSS1500;TSS1500;TSS1500;TSS1500	ENSG00000197111.16;ENSG00000197111.16;ENSG00000197111.16;ENSG00000197111.16;ENSG00000197111.16;ENSG00000197111.16;ENSG00000197111.16;ENSG00000197111.16	ENST00000552980.6;ENST00000552819.5;ENST00000550910.1;ENST00000455667.7;ENST00000439930.7;ENST00000548933.5;ENST00000546652.6;ENST00000562264.5		12:53453542-53453779			FALSE					Quies;EnhWk;TssFlnkD;TxWk;TssFlnk;TssFlnkU;EnhA1;EnhG2;Tx;EnhG1;ReprPCWk;EnhA2;ReprPC;TssA	94;49;335;385;238;95;20;97;171;70;38;52;9;10
cg00066663	cg00066663	-0.0331274	0.00622717	-5.31981	1.03874e-07	0.0024446	cg00066663_TC21	4730946	ACCAAACTCCAAACCATAAACTCTAACTATAACAAATCCTTTCAATCACC						cg	R	T	C	2	II	17	7889356	Human	GRCh38	CGGTGACTGAAAGGACCTGCCACAGTCAGAGCCCATGGCCTGGAGCCTGG	CCCAGTTCCTGGGCAGGATGCCAGCTGGCGAAGTGAGGGGGAAGGCAGGAGGAGCCCTGG[CG]GTGACTGAAAGGACCTGCCACAGTCAGAGCCCATGGCCTGGAGCCTGGTCTCTTGTTAGT	ACTAACAAGAGACCAGGCTCCAGGCCATGGGCTCTGACTGTGGCAGGTCCTTTCAGTCAC[CG]CCAGGGCTCCTCCTGCCTTCCCCCTCACTTCGCCAGCTGGCATCCTGCCCAGGAACTGGG	1				chr17:7884961-7885773	S_Shelf	TSS1500;TSS1500;TSS1500	ENSG00000170004.19;ENSG00000170004.19;ENSG00000170004.19	ENST00000570758.1;ENST00000574022.1;ENST00000452447.1			17:7791365-7793314	Promoter_Associated	TRUE		EH38D4986786	EH38E3207448|CTCF-only/CTCF-bound;EH38E3207448|DNase-H3K4me3;EH38E3207448|DNase-H3K4me3/CTCF-bound;EH38E3207448|DNase-only;EH38E3207448|Low-DNase;EH38E3207448|pELS;EH38E3207448|pELS/CTCF-bound	3;1;1;2;5;3;72	ReprPCWk;EnhA1;Quies;TssFlnkU;EnhA2;TssFlnkD;TxWk;TssA;EnhWk;ReprPC;EnhG1;Tx;TssFlnk;EnhG2	116;452;655;241;24;14;67;13;64;8;2;2;1;4	cg00066663
cg00080333	cg00080333	-0.0379292	0.0058328	-6.50276	7.8862e-11	2.8865e-05	cg00080333_TC21	7724555	TATCATTAAACAACAACCAAAACTTAAAACTCCTCAACCTTAAAACTATC						cg	F	T	C	2	II	4	183571617	Human	GRCh38	CGACAGCCTCAAGGTTGAGGAGCCTCAAGTTTTGGCTGCTGTTCAATGAC	CTGCACAGACTTGTCATTGAACAGCAGCCAAAACTTGAGGCTCCTCAACCTTGAGGCTGT[CG]GCCAAGTGGCCCTGCTAGCTTCCCTCCCCTGAGTCCTGCCAGCACTTCCTGTTTCTGTTC	CTGCACAGACTTGTCATTGAACAGCAGCCAAAACTTGAGGCTCCTCAACCTTGAGGCTGT[CG]GCCAAGTGGCCCTGCTAGCTTCCCTCCCCTGAGTCCTGCCAGCACTTCCTGTTTCTGTTC	1											4:184492754-184492822	Unclassified_Cell_type_specific	TRUE		EH38D5618647	EH38E3618525|dELS;EH38E3618525|DNase-only;EH38E3618525|Low-DNase	10;22;55	Quies;ReprPCWk;EnhA2;EnhWk;TssFlnkD;TxWk;EnhA1;Tx;TssFlnk;Het;TssBiv;TssFlnkU;ReprPC;ZNF/Rpts;EnhBiv	1325;62;39;120;44;28;16;2;10;5;1;5;2;1;3	cg00080333
cg00080483	cg00080483	-0.0340737	0.00723684	-4.70836	2.49715e-06	0.0160821	cg00080483_TC21	34727589	AAATCCAAACACTAACCACAACAACATAAATCAAAAAACAATCAAAACTC						cg	R	T	C	2	II	6	34250277	Human	GRCh38	CGAGTTTTGACTGCCTCCTGATCCATGCTGCTGTGGTTAGTGCCTGGACT	CTACCGTTTCAGGAAGCGGGAGGCTAGGGTGGGGTTGAGGCTACATTGTGCTACCATGCT[CG]AGTTTTGACTGCCTCCTGATCCATGCTGCTGTGGTTAGTGCCTGGACTTGTCTGCCCACT	AGTGGGCAGACAAGTCCAGGCACTAACCACAGCAGCATGGATCAGGAGGCAGTCAAAACT[CG]AGCATGGTAGCACAATGTAGCCTCAACCCCACCCTAGCCTCCCGCTTCCTGAAACGGTAG	1	TSS1500;TSS1500;TSS1500;TSS1500;TSS1500;TSS1500	SMIM29;SMIM29;SMIM29;SMIM29;SMIM29;SMIM29	NM_178508.6;NM_001287396.3;NM_001008703.4;NM_001008704.4;NR_155742.2;NR_155741.2	chr6:34248631-34249571	S_Shore	TSS1500;TSS1500;TSS1500;TSS1500;TSS1500;TSS1500;TSS1500;TSS1500;TSS1500	ENSG00000186577.14;ENSG00000186577.14;ENSG00000186577.14;ENSG00000186577.14;ENSG00000186577.14;ENSG00000186577.14;ENSG00000186577.14;ENSG00000186577.14;ENSG00000186577.14	ENST00000636500.1;ENST00000481533.5;ENST00000476320.6;ENST00000413013.6;ENST00000394990.8;ENST00000637920.1;ENST00000463083.1;ENST00000468145.1;ENST00000495581.1					FALSE		EH38D5746676	EH38E3702943|Low-DNase;EH38E3702943|pELS	86;1	TxWk;EnhA1;Quies;EnhWk;TssFlnkD;Tx;TssA;ReprPCWk;TssFlnk;EnhA2;ReprPC;EnhBiv;EnhG1;Het;TssFlnkU	329;22;1054;206;7;21;1;2;3;11;1;1;3;1;1
cg00098693	cg00098693	-0.0119989	0.00240414	-4.99096	6.00799e-07	0.00683193	cg00098693_TC21	68624507	AAAACACCACACTAACACAAAAAAAATTTTATTTTTCTATTATATACAAC						cg	R	T	C	2	II	1	185734069	Human	GRCh38	CGTTGTACACAATAGAAAAACAAAATTCCCTTTGTGCTAGTGTGGTGTCC	GAGGCTGGGCTGGGGCGTCTTGACTTTTGGGGGGAATTAGGAAAGAGGTGTCTAAAGCCG[CG]TTGTACACAATAGAAAAACAAAATTCCCTTTGTGCTAGTGTGGTGTCCCTCGGTTTGGGT	ACCCAAACCGAGGGACACCACACTAGCACAAAGGGAATTTTGTTTTTCTATTGTGTACAA[CG]CGGCTTTAGACACCTCTTTCCTAATTCCCCCCAAAAGTCAAGACGCCCCAGCCCAGCCTC	1	TSS1500	HMCN1	NM_031935.3			TSS1500	ENSG00000143341.12	ENST00000271588.9			1:185702780-185703329	Unclassified	TRUE					Quies;TssA;TssFlnkD;TssBiv;TssFlnkU;TssFlnk;ReprPCWk;ReprPC;EnhA2;EnhA1;TxWk;EnhBiv;EnhWk;Tx	802;297;19;218;193;74;25;7;4;2;9;7;5;1	cg00098693
cg00105253	cg00105253	-0.0214113	0.00471151	-4.54446	5.50767e-06	0.0261178	cg00105253_TC21	45722406	AATCCCCAAAACAACCAAAAAATTCCACTACCAAAAAAATCRAATTAAAC						cg	F	T	C	2	II	14	105180857	Human	GRCh38	CGCCCAATCCGACCCTCTTGGCAGTGGAACTCCTTGGTTGCCCTGGGGAT	AAGCCTTCCCTGATCCCCAGGGCAACCAAGGAGTTCCACTGCCAAGAGGGTCGGATTGGG[CG]GGCGGGAAGGATGGGGCCCAGCAATGCTTCCTTGAAAGGATGAGTGGTGCCCCCTCAGAT	AAGCCTTCCCTGATCCCCAGGGCAACCAAGGAGTTCCACTGCCAAGAGGGTCGGATTGGG[CG]GGCGGGAAGGATGGGGCCCAGCAATGCTTCCTTGAAAGGATGAGTGGTGCCCCCTCAGAT	1				chr14:105180926-105181469	N_Shore						14:105646800-105648756	Unclassified	TRUE					TxWk;TssBiv;Tx;TssFlnkD;TssFlnkU;TssFlnk;Quies;EnhWk;EnhG1;EnhA1;TssA;ReprPCWk;EnhA2	169;241;580;319;163;74;43;13;39;3;15;3;1	cg00105253	cg00105253
cg00110578	cg00110578	-0.0117267	0.00268713	-4.36403	1.27691e-05	0.0435949	cg00110578_TC21	71804545	AATATAAACCTAAAATCCRTTCTCACAACTAAATCTAAAATCTAAATACC						cg	F	T	C	2	II	6	25992787	Human	GRCh38	CGGCATTCAGACCCCAGATCCAGCTGTGAGAACGGACCCCAGGCTCACAC	CCCGCAGGCCTGGTGTGAGCCTGGGGTCCGTTCTCACAGCTGGATCTGGGGTCTGAATGC[CG]CGCCCTCTGGAGAGCCACAGATGGGTCTCCGCTGATGCTTCTCTCAATTTCCTCTAAGAG	CCCGCAGGCCTGGTGTGAGCCTGGGGTCCGTTCTCACAGCTGGATCTGGGGTCTGAATGC[CG]CGCCCTCTGGAGAGCCACAGATGGGTCTCCGCTGATGCTTCTCTCAATTTCCTCTAAGAG	1				chr6:25991953-25992936	Island	exon_1;exon_1;exon_1;exon_1;exon_1;exon_1;exon_1;exon_1;exon_1;TSS200	LINC02980;LINC02980;LINC02980;LINC02980;LINC02980;LINC02980;LINC02980;LINC02980;LINC02980;ENSG00000272462.4	ENST00000658335.1;ENST00000658630.1;ENST00000606723.2;ENST00000653223.2;ENST00000656572.1;ENST00000670129.1;ENST00000656696.1;ENST00000660716.1;ENST00000658377.1;ENST00000666742.1	chr6:25992026-25992845		6:25991965-25993452	Promoter_Associated	TRUE		EH38D3826581	EH38E2455622|Low-DNase;EH38E2455622|PLS;EH38E2455622|PLS/CTCF-bound	3;1;83	TssA;TssFlnkU;TssFlnk;EnhA2;TssFlnkD	1504;125;28;4;2	cg00110578
cg00120118	cg00120118	0.0486744	0.0111995	4.34611	1.3857e-05	0.0457241	cg00120118_BC21	2692131	TTATTAAAATAACAAACTCATTTTTCTATATCAAACATTCAACTACTTAC						cg	F	B	C	2	II	X	33212601	Human	GRCh38	TGTTAAAGTGACAGACTCATTTTTCTATGTCAAACATTCAACTGCTTGCG	TATTGTACCATTTGTTAAAGTGACAGACTCATTTTTCTATGTCAAACATTCAACTGCTTG[CG]ACTGCAATGAGTAATAGATAAAAATTAAAAAAATATTGAGTCAGACTGTGATGTTTACCT	AGGTAAACATCACAGTCTGACTCAATATTTTTTTAATTTTTATCTATTACTCATTGCAGT[CG]CAAGCAGTTGAATGTTTGACATAGAAAAATGAGTCTGTCACTTTAACAAATGGTACAATA	1	TSS1500	DMD	NM_004006.3			TSS1500;TSS1500;TSS1500;TSS1500;TSS1500;TSS1500;TSS1500;TSS1500;TSS1500;TSS1500;TSS1500;TSS1500;TSS1500;TSS1500;TSS1500;TSS1500;TSS1500;TSS1500;TSS1500;TSS1500;TSS1500;TSS1500	ENSG00000198947.18;ENSG00000198947.18;ENSG00000198947.18;ENSG00000198947.18;ENSG00000198947.18;ENSG00000198947.18;ENSG00000198947.18;ENSG00000198947.18;ENSG00000198947.18;ENSG00000198947.18;ENSG00000198947.18;ENSG00000198947.18;ENSG00000198947.18;ENSG00000198947.18;ENSG00000198947.18;ENSG00000198947.18;ENSG00000198947.18;ENSG00000198947.18;ENSG00000198947.18;ENSG00000198947.18;ENSG00000198947.18;…	ENST00000357033.9;ENST00000488902.5;ENST00000420596.5;ENST00000448370.5;ENST00000682899.1;ENST00000683985.1;ENST00000684165.1;ENST00000682071.1;ENST00000682924.1;ENST00000684292.1;ENST00000684237.1;ENST00000682870.1;ENST00000684660.1;ENST00000683309.1;ENST00000684056.1;ENST00000683658.1;ENST00000682437.1;ENST00000682584.1;ENST00000684357.1;ENST00000682307.1;ENST00000682439.1;ENST00000463609.2					FALSE					Quies;ReprPCWk;TxWk;EnhA2;Het;EnhWk;EnhA1;TssFlnk	1544;23;47;30;10;6;2;1
cg00124095	cg00124095	-0.0511479	0.0113982	-4.48737	7.21088e-06	0.0310045	cg00124095_TC21	82649968	RCRCAAAACTTACTCRAAACAACTCTAATTTCCAAACCACAAACAAAAAC						cg	R	T	C	2	II	3	72255931	Human	GRCh38	CGTTCCTGCCTGTGGCCTGGAAATCAGAGCTGCTTCGAGCAAGCTCTGCG	TCATTAGGACTAAGCCAGTCCCATGGAGCCCCAAGAGGAGAAGAGGCCAATGAGCCAAGC[CG]TTCCTGCCTGTGGCCTGGAAATCAGAGCTGCTTCGAGCAAGCTCTGCGCGGGCTCTTTAA	TTAAAGAGCCCGCGCAGAGCTTGCTCGAAGCAGCTCTGATTTCCAGGCCACAGGCAGGAA[CG]GCTTGGCTCATTGGCCTCTTCTCCTCTTGGGGCTCCATGGGACTGGCTTAGTCCTAATGA	1											3:72305024-72305627	Unclassified_Cell_type_specific	TRUE		EH38D5465967	EH38E3522932|dELS;EH38E3522932|DNase-only;EH38E3522932|Low-DNase	10;2;75	Quies;EnhA1;EnhWk;EnhBiv;ReprPCWk;ReprPC;TxWk;EnhA2;TssFlnkU;TssFlnkD;TssA	694;408;259;47;189;20;22;10;9;3;2	cg00124095
cg00128877	cg00128877	-0.0151869	0.00328419	-4.62426	3.7594e-06	0.0207807	cg00128877_TC21	5656378	ATTCCTTCCTAACCTACAAAAACTCTCAATACATATTAATTACACCTATC						cg	R	T	C	2	II	1	46604506	Human	GRCh38	CGACAGGTGTAATTAACATGTACTGAGAGCTTCTGCAGGCCAGGAAGGAA	TCCGGCGCTTTCTTTTCCGAATGGAGGGTGGAGAAGCCCGGGAAGGTAGGAGGCCGGGCG[CG]ACAGGTGTAATTAACATGTACTGAGAGCTTCTGCAGGCCAGGAAGGAATTTTAAAATGCC	GGCATTTTAAAATTCCTTCCTGGCCTGCAGAAGCTCTCAGTACATGTTAATTACACCTGT[CG]CGCCCGGCCTCCTACCTTCCCGGGCTTCTCCACCCTCCATTCGGAAAAGAAAGCGCCGGA	1	TSS1500;TSS1500;TSS1500;TSS1500;TSS1500;TSS1500;TSS1500;TSS1500;TSS1500;TSS1500;TSS1500;TSS1500;TSS1500;TSS1500;TSS1500	MKNK1;MKNK1;MKNK1;MKNK1;MKNK1;MKNK1;MKNK1;MKNK1;MKNK1;MKNK1;MKNK1;MKNK1;MKNK1;MKNK1;MKNK1	NM_001377375.1;NM_001377338.1;NM_001377342.1;NM_003684.7;NM_001135553.4;NM_001377374.1;NM_001377337.1;NM_001377341.1;NM_001377373.1;NM_198973.5;NM_001377343.1;NR_024176.3;NR_024174.3;NR_146512.2;NR_165250.1	chr1:46603943-46604507	Island	TSS1500;TSS1500;TSS1500;TSS1500;TSS1500;TSS1500;TSS1500;TSS1500;TSS1500;TSS1500;TSS1500;TSS1500;TSS1500;TSS1500	ENSG00000079277.22;ENSG00000079277.22;ENSG00000079277.22;ENSG00000079277.22;ENSG00000079277.22;ENSG00000079277.22;ENSG00000079277.22;ENSG00000079277.22;ENSG00000079277.22;ENSG00000079277.22;ENSG00000079277.22;ENSG00000079277.22;ENSG00000079277.22;ENSG00000079277.22	ENST00000371945.10;ENST00000341183.9;ENST00000649800.1;ENST00000650026.1;ENST00000650508.1;ENST00000371946.9;ENST00000528077.6;ENST00000428112.7;ENST00000531355.6;ENST00000496619.6;ENST00000526513.6;ENST00000529170.6;ENST00000525888.5;ENST00000468852.2			1:47069491-47070741	Promoter_Associated	TRUE					Quies;TssA;TssFlnk;EnhWk;ReprPCWk;EnhA2;TxWk;ReprPC;TssFlnkU;EnhA1;TssFlnkD	783;663;154;2;39;9;4;1;5;1;2	cg00128877	cg00128877
cg00131853	cg00131853	-0.0142411	0.00325593	-4.37389	1.2205e-05	0.0425133	cg00131853_BC21	90622842	ACTAATAACTAAAACAACACAACACTATCAATCAACCTAATCTAAATAAC						cg	R	B	C	2	II	7	152069417	Human	GRCh38	CTGATAACTAGAACAGCACAGCACTATCAATCAACCTGATCTAAATGACG	GGTGAATGTGAGCTAGAGAAGAATGTATATCTACCATGATTGGATGGAATTTTCTATAAA[CG]TCATTTAGATCAGGTTGATTGATAGTGCTGTGCTGTTCTAGTTATCAGTTTCTTTACTGA	GGTGAATGTGAGCTAGAGAAGAATGTATATCTACCATGATTGGATGGAATTTTCTATAAA[CG]TCATTTAGATCAGGTTGATTGATAGTGCTGTGCTGTTCTAGTTATCAGTTTCTTTACTGA	1													FALSE					Het;TxWk;Quies;ZNF/Rpts;ReprPCWk;EnhWk	226;83;1271;77;3;3
cg00137016	cg00137016	-0.0592251	0.0105175	-5.63113	1.79035e-08	0.000844652	cg00137016_BC21	24642324	CTACTAAATAACTTCAACCTTAACTAACTTCAACCTCACTAACAAAACCC						cg	R	B	C	2	II	19	52171978	Human	GRCh38	TACTGAGTAACTTCAGCCTTAACTGGCTTCAGCCTCACTGGCAAGACCCG	TCTTGTCAAGTTGAACTGATTTAAGTCAAAATCGATTTTTGCGAGCCTGGTGGACTCCAT[CG]GGTCTTGCCAGTGAGGCTGAAGCCAGTTAAGGCTGAAGTTACTCAGTAGTCAGGGAACTA	TCTTGTCAAGTTGAACTGATTTAAGTCAAAATCGATTTTTGCGAGCCTGGTGGACTCCAT[CG]GGTCTTGCCAGTGAGGCTGAAGCCAGTTAAGGCTGAAGTTACTCAGTAGTCAGGGAACTA	1	TSS1500	ZNF836	NM_001102657.3	chr19:52171074-52171602	S_Shore	TSS1500;TSS1500;TSS1500;TSS1500;TSS1500	ENSG00000267827.5;ENSG00000267827.5;ENSG00000196267.14;ENSG00000196267.14;ENSG00000196267.14	ENST00000598982.5;ENST00000594362.1;ENST00000682614.1;ENST00000597252.5;ENST00000597065.1			19:52674229-52675399	Unclassified	TRUE		EH38D5147714	EH38E3315471|DNase-H3K4me3;EH38E3315471|Low-DNase;EH38E3315471|pELS	4;68;15	ReprPCWk;Quies;TssFlnkU;TssA;TssFlnk;ZNF/Rpts;TssFlnkD;Het;EnhWk;EnhA1;TxWk;EnhA2;EnhBiv;TssBiv;ReprPC	218;573;547;102;64;47;33;41;11;9;3;12;1;1;1	cg00137016
cg00146088	cg00146088	-0.0396564	0.0080544	-4.92357	8.49808e-07	0.00828703	cg00146088_BC21	50607419	ACAAACCTATAATACRAATCACTACCTAAAACCRCATAATAAATAAAAAC						cg	F	B	C	2	II	10	70478102	Human	GRCh38	CAGGCCTATGGTGCGGGTCACTGCCTGGAGCCGCATGATGGGTGGGGGCG	TGGTGGGGGGGGCAGGCCTATGGTGCGGGTCACTGCCTGGAGCCGCATGATGGGTGGGGG[CG]GAGGGACCCCTCTCCATCCAAAGCTCTGCTCTGCTGTTCCCCTCTCACCTCTGGGGGCCG	CGGCCCCCAGAGGTGAGAGGGGAACAGCAGAGCAGAGCTTTGGATGGAGAGGGGTCCCTC[CG]CCCCCACCCATCATGCGGCTCCAGGCAGTGACCCGCACCATAGGCCTGCCCCCCCCACCA	1	TSS1500	PALD1	NM_014431.3	chr10:70477905-70479065	Island	TSS1500;TSS1500;TSS1500;TSS1500;TSS1500;TSS1500;TSS1500;TSS1500;TSS1500	ENSG00000107719.10;ENSG00000107719.10;ENSG00000107719.10;ENSG00000107719.10;ENSG00000107719.10;ENSG00000107719.10;ENSG00000107719.10;ENSG00000107719.10;ENSG00000107719.10	ENST00000263563.7;ENST00000697547.1;ENST00000697570.1;ENST00000697546.1;ENST00000697577.1;ENST00000697578.1;ENST00000697571.1;ENST00000697572.1;ENST00000697573.1			10:72237782-72238157	Promoter_Associated	TRUE		EH38D4523311	EH38E2906314|CTCF-only/CTCF-bound;EH38E2906314|DNase-H3K4me3;EH38E2906314|Low-DNase;EH38E2906314|pELS	1;12;63;11	Quies;TssBiv;TssFlnkD;TssFlnkU;EnhBiv;TssFlnk;ReprPCWk;EnhWk;ReprPC;TssA;TxWk;EnhA2;EnhA1;Het;EnhG2	823;464;85;121;44;44;6;17;6;26;10;6;9;1;1
cg00146864	cg00146864	-0.0479953	0.00819586	-5.85604	4.74027e-09	0.00040405	cg00146864_TC21	53699169	ACAACRAAAAAAACAACCCTAAATAAAACTTTCATCTCTTTCACATCTCC						cg	F	T	C	2	II	17	45314966	Human	GRCh38	CGGAGATGTGAAAGAGATGAAAGCTTTATCCAGGGTTGTTTTCTTCGTTG	AGAGGGTGCCAACAACGAAGAAAACAACCCTGGATAAAGCTTTCATCTCTTTCACATCTC[CG]CAGATCTCTCACCAGACCCTAGCCAGGGATGAACTGTTATCAATCACCAAAAAAAAAAAA	AGAGGGTGCCAACAACGAAGAAAACAACCCTGGATAAAGCTTTCATCTCTTTCACATCTC[CG]CAGATCTCTCACCAGACCCTAGCCAGGGATGAACTGTTATCAATCACCAAAAAAAAAAAA	1				chr17:45316525-45317572	N_Shore								FALSE		EH38D5016407	EH38E3226528|dELS;EH38E3226528|Low-DNase	6;81	Quies;TxWk;TssFlnkU;ZNF/Rpts;Het;EnhA2;TssA;EnhA1;TssFlnkD;TssFlnk;EnhWk;ReprPCWk;ReprPC	347;77;435;377;49;32;68;48;85;31;94;19;1	cg00146864
cg00152041	cg00152041	-0.0316011	0.00715932	-4.41399	1.01485e-05	0.0379429	cg00152041_BC21	9788297	CAAACTAAAAAATACCCCRCTTAACRTACAAAACCCTCTTTAAAACTACC						cg	F	B	C	2	II	20	62643515	Human	GRCh38	AGGCTGGGGGGTGCCCCGCTTGGCGTGCAAGGCCCTCTTTGGAGCTGCCG	TGGTGAACCCTCAGGCTGGGGGGTGCCCCGCTTGGCGTGCAAGGCCCTCTTTGGAGCTGC[CG]TGGGACCTGGCTATGCGTCCTGTTTCTGTCTGGAGGCGGCTGGAACGCGGTAGTTTTCCA	TGGAAAACTACCGCGTTCCAGCCGCCTCCAGACAGAAACAGGACGCATAGCCAGGTCCCA[CG]GCAGCTCCAAAGAGGGCCTTGCACGCCAAGCGGGGCACCCCCCAGCCTGAGGGTTCACCA	1				chr20:62641925-62643565	Island	TSS1500	ENSG00000167046.4	ENST00000370520.3					FALSE		EH38D5351659	EH38E3447516|DNase-H3K4me3;EH38E3447516|DNase-H3K4me3/CTCF-bound;EH38E3447516|DNase-only;EH38E3447516|Low-DNase;EH38E3447516|pELS	8;1;1;54;23	TxWk;TssBiv;EnhWk;EnhBiv;TssA;TssFlnkU;Quies;ReprPCWk;Tx;EnhA2;ReprPC;TssFlnkD;TssFlnk;Het;EnhA1;EnhG2	757;551;23;53;23;62;7;4;16;52;28;53;25;5;3;1	cg00152041
cg00155619	cg00155619	-0.0378205	0.00766626	-4.93338	8.08204e-07	0.00802138	cg00155619_TC21	85762392	CTTCCTAATCACTCAAACTACAACACAAACCCTAATATCCAATAATTATC						cg	F	T	C	2	II	6	33205501	Human	GRCh38	CGACAACCATTGGACACCAGGGCTTGTGCTGCAGCCTGAGTGACTAGGAA	CGCCAGGGCACCTTCCTAGTCACTCAGGCTGCAGCACAAGCCCTGGTGTCCAATGGTTGT[CG]TGGTTCCATCATCAACATCAGTAGCATCGTAGGAAAGGTCAGGTTGAGTTGGACGAGGTC	CGCCAGGGCACCTTCCTAGTCACTCAGGCTGCAGCACAAGCCCTGGTGTCCAATGGTTGT[CG]TGGTTCCATCATCAACATCAGTAGCATCGTAGGAAAGGTCAGGTTGAGTTGGACGAGGTC	1	exon_4	HSD17B8	NM_014234.5_6	chr6:33204512-33205046;chr6:33207784-33208575	S_Shore;N_Shelf	exon_4;exon_3	HSD17B8;HSD17B8	ENST00000374662.4;ENST00000469186.1			6:33171945-33173651	Promoter_Associated	TRUE		EH38D3832956	EH38E2460458|DNase-H3K4me3;EH38E2460458|DNase-only;EH38E2460458|Low-DNase;EH38E2460458|pELS;EH38E2460458|pELS/CTCF-bound	4;1;65;14;3	ReprPCWk;ReprPC;EnhWk;EnhBiv;Quies;TssFlnkD;TssFlnkU;EnhA1;TxWk;TssBiv;TssA;TssFlnk;EnhA2;EnhG2	567;62;322;9;202;89;197;108;53;31;4;10;8;1	cg00155619
cg00159243	cg00159243	-0.0397739	0.00906462	-4.38782	1.14493e-05	0.0408158	cg00159243_BC11	4609196	AACTCTAACAATACCATCACACTAATTAACAAACAAAACCCAAAACAACA	19761101	AACTCTAACGATACCATCACACTAATTAACAAACAAAACCCGAAACGACG	A	Red	R	cg	F	B	C	1	I	12	108630023	Human	GRCh38	GGCTCTAACGGTGCCATCACACTGATTAGCAAGCAAGGCCCGGAGCGGCG	CCTGTGTTCACTGGCTCTAACGGTGCCATCACACTGATTAGCAAGCAAGGCCCGGAGCGG[CG]GGATCACTCCCAGGCCCCACCTTCCACCTCTCCTCTTCCTGGAAGGCCAAAAAACAGTCC	GGACTGTTTTTTGGCCTTCCAGGAAGAGGAGAGGTGGAAGGTGGGGCCTGGGAGTGATCC[CG]CCGCTCCGGGCCTTGCTTGCTAATCAGTGTGATGGCACCGTTAGAGCCAGTGAACACAGG	1									chr12:108629793-108630235		12:109023520-109023885	Promoter_Associated	TRUE		EH38D4726198	EH38E3039347|DNase-only;EH38E3039347|Low-DNase;EH38E3039347|pELS	13;45;29	ReprPCWk;EnhWk;Quies;TssFlnkU;EnhA2;TssA;EnhA1;ReprPC;TxWk;TssFlnkD;TssFlnk;Het;Tx;EnhBiv;EnhG2	322;150;436;125;149;12;265;93;87;5;7;8;1;2;1	cg00159243
cg00179110	cg00179110	-0.0542035	0.0105099	-5.15739	2.50413e-07	0.0041529	cg00179110_BC21	85796920	CAACAAACTTCAAACTCTACCAAACAAATATATAACAAAAATACCAAAAC						cg	R	B	C	2	II	2	25719865	Human	GRCh38	AACAGGCTTCAAGCTCTGCCAAGCAAGTGTGTAGCAGGAATACCAGGACG	AAGGCTGCCTGTTTTGCCTCTGCCTGTTCTTACCTGGCCAGTCCAGTCCTGCCTGCTATT[CG]TCCTGGTATTCCTGCTACACACTTGCTTGGCAGAGCTTGAAGCCTGTTGGCTCTGGACCA	AAGGCTGCCTGTTTTGCCTCTGCCTGTTCTTACCTGGCCAGTCCAGTCCTGCCTGCTATT[CG]TCCTGGTATTCCTGCTACACACTTGCTTGGCAGAGCTTGAAGCCTGTTGGCTCTGGACCA	1													FALSE		EH38D5173398	EH38E3331790|dELS;EH38E3331790|DNase-only;EH38E3331790|Low-DNase	2;6;79	Quies;ReprPCWk;TxWk;ReprPC;EnhA2;EnhWk;TssA;EnhA1;Het;Tx	1404;110;55;46;12;26;1;7;1;1
cg00186207	cg00186207	-0.0169454	0.00368969	-4.59265	4.37657e-06	0.0228711	cg00186207_TC21	77675575	ATCTCATCTTCCTTACATAATACAAAAAAACATATAAACAAAAATAAATC						cg	F	T	C	2	II	2	134031004	Human	GRCh38	CGATCTATCTCTGCCTACATGTCTCTCTGCACTATGCAAGGAAGATGAGA	TTCCCCAACCTATCTCATCTTCCTTGCATAGTGCAGAGAGACATGTAGGCAGAGATAGAT[CG]ACTCATCCATCCATCTCCACTGCAAGGGACGTAATAAGCAAAGGCATGAATTCATGAGTT	TTCCCCAACCTATCTCATCTTCCTTGCATAGTGCAGAGAGACATGTAGGCAGAGATAGAT[CG]ACTCATCCATCCATCTCCACTGCAAGGGACGTAATAAGCAAAGGCATGAATTCATGAGTT	1													FALSE					Quies;ReprPCWk;EnhWk;TxWk;ReprPC;Het;EnhA2	1216;336;12;13;78;5;3	cg00186207
cg00187059	cg00187059	-0.0354594	0.00811207	-4.37119	1.23573e-05	0.0428086	cg00187059_TC21	51698430	ACAACTACTTCATCTTCRTCATCATCATCCAACACRATAATACTATTAAC						cg	F	T	C	2	II	6	33321916	Human	GRCh38	CGCTAACAGCATCATCGTGCTGGATGATGATGACGAAGATGAAGCAGCTG	GCCCTGGCTGAGCAGCTGCTTCATCTTCGTCATCATCATCCAGCACGATGATGCTGTTAG[CG]GTGGCCATAGGGGATCAAATCCCCCGGAGGGAGGAAGTGGTGGGGATTTCAGAATTCCTG	GCCCTGGCTGAGCAGCTGCTTCATCTTCGTCATCATCATCCAGCACGATGATGCTGTTAG[CG]GTGGCCATAGGGGATCAAATCCCCCGGAGGGAGGAAGTGGTGGGGATTTCAGAATTCCTG	1	exon_2;exon_2	DAXX;DAXX	NM_001141969.2_5;NM_001350.5_5	chr6:33320956-33321231;chr6:33322593-33323310	S_Shore;N_Shore	exon_2;exon_2;exon_2;exon_2;exon_2;exon_2;exon_3;3UTR;TSS200;TSS1500	DAXX;DAXX;DAXX;DAXX;DAXX;DAXX;ENSG00000285064;ENSG00000285064;ENSG00000204209.13;ENSG00000204209.13	ENST00000374542.10;ENST00000266000.10;ENST00000620164.4;ENST00000446403.1;ENST00000498030.1;ENST00000446511.1;ENST00000453407.7;ENST00000453407.7;ENST00000477162.1;ENST00000490173.1					FALSE		EH38D5745329	EH38E3701993|Low-DNase;EH38E3701993|pELS	84;3	Quies;TssFlnkU;TssFlnkD;TxWk;ReprPCWk;TssA;EnhA2;EnhWk;TssFlnk;EnhG1;EnhA1;EnhG2	786;413;286;7;42;15;10;27;36;3;29;9	cg00187059
cg00197612	cg00197612	-0.040715	0.00793292	-5.13241	2.86056e-07	0.00451655	cg00197612_BC21	20791868	RAAAAAATCTTAACCATTTTACRAATAAACCTAATCACCCTACACAAAAC						cg	F	B	C	2	II	21	31344505	Human	GRCh38	AAAAGGTCTTAACCATTTTACGGATGAACCTGGTCACCCTGCACAAAGCG	CAATGTATTTCGAAAAGGTCTTAACCATTTTACGGATGAACCTGGTCACCCTGCACAAAG[CG]TGAGTGCTTGTCAAATAATTTTCTACAGCACGTGGCAAAAAAGCAGCGCCTCTTAAAAGA	TCTTTTAAGAGGCGCTGCTTTTTTGCCACGTGCTGTAGAAAATTATTTGACAAGCACTCA[CG]CTTTGTGCAGGGTGACCAGGTTCATCCGTAAAATGGTTAAGACCTTTTCGAAATACATTG	1	TSS1500;TSS1500;TSS1500	TIAM1;TIAM1;TIAM1	NM_001353694.2;NM_001353686.2;NM_001353687.2	chr21:31343729-31344170	S_Shore	TSS1500;TSS1500	ENSG00000156299.15;ENSG00000156299.15	ENST00000541036.6;ENST00000698169.1					FALSE		EH38D5363165	EH38E3454632|DNase-H3K4me3;EH38E3454632|Low-DNase	2;85	Quies;TssBiv;TssFlnkD;EnhWk;TssFlnk;ReprPC;ReprPCWk;TssFlnkU;TssA;EnhA2;EnhBiv;Het;TxWk;EnhA1	882;321;73;34;74;108;50;31;4;2;64;11;8;1
cg00202369	cg00202369	-0.031723	0.00700088	-4.53128	5.86272e-06	0.0272178	cg00202369_BC21	41765113	AAAAACRAAAAAACACCAATTCAACCCTAAACAATCAATACTAACAAATC						cg	R	B	C	2	II	16	88408610	Human	GRCh38	AAAGCGGGGAGACACCAATTCAGCCCTGAGCAGTCAGTGCTGGCAGGTCG	AGAACCCTCACCAGAAGCGGGGTCAGCACGAGGCTCAGGAATGCCCTCCCAGACTGCCAA[CG]ACCTGCCAGCACTGACTGCTCAGGGCTGAATTGGTGTCTCCCCGCTTTCCTTCCGGAATC	AGAACCCTCACCAGAAGCGGGGTCAGCACGAGGCTCAGGAATGCCCTCCCAGACTGCCAA[CG]ACCTGCCAGCACTGACTGCTCAGGGCTGAATTGGTGTCTCCCCGCTTTCCTTCCGGAATC	1													FALSE					Quies;EnhWk;ReprPCWk;TxWk;EnhA2;Het;EnhA1;EnhG2;EnhBiv;Tx;ReprPC;EnhG1	1362;117;83;64;6;2;14;1;10;1;2;1
cg00228735	cg00228735	-0.0331055	0.00752822	-4.39752	1.09497e-05	0.0397379	cg00228735_BC21	72612110	CTCCAAACACTAAACTTAACTCACTAAACAATAAAAAACAAATACCAAAC						cg	F	B	C	2	II	7	131619746	Human	GRCh38	TCCAGGCACTGGGCTTGACTCACTGGGCAGTGGGAGGCAGATGCCAGGCG	GTGTTTCCTAGCTCCAGGCACTGGGCTTGACTCACTGGGCAGTGGGAGGCAGATGCCAGG[CG]AAAGGGCTTGTCTGAGAGGAAGGCCTAAGGTTCCTGGGGAGAAACGATCTCACTTCCTCT	AGAGGAAGTGAGATCGTTTCTCCCCAGGAACCTTAGGCCTTCCTCTCAGACAAGCCCTTT[CG]CCTGGCATCTGCCTCCCACTGCCCAGTGAGTCAAGCCCAGTGCCTGGAGCTAGGAAACAC	1											7:131304456-131304724	Unclassified_Cell_type_specific	TRUE		EH38D5897422	EH38E3800822|dELS;EH38E3800822|DNase-only;EH38E3800822|Low-DNase	2;4;81	ReprPCWk;Quies;EnhWk;EnhA2;EnhA1;TxWk;ReprPC;Het;TssFlnkD;EnhBiv;ZNF/Rpts	464;903;149;34;73;20;9;4;1;4;2	cg00228735
cg00233307	cg00233307	-0.0292561	0.00588033	-4.97525	6.51639e-07	0.00714569	cg00233307_TC21	55623129	CAAACRTATAAACRTACATCTACCTAAATACCTATATACACAATACACAC						cg	F	T	C	2	II	19	38618436	Human	GRCh38	CGTGTGTACTGTGCACACAGGTATCCAGGCAGATGCACGTCTACACGCCT	TCTGCACTGCGCAGGCGTGTAGACGTGCATCTGCCTGGATACCTGTGTGCACAGTACACA[CG]TGGATGTACCCAGGACATATACCTCCACATGCATGGCACATAACTGCATTTTGTAGGCCT	TCTGCACTGCGCAGGCGTGTAGACGTGCATCTGCCTGGATACCTGTGTGCACAGTACACA[CG]TGGATGTACCCAGGACATATACCTCCACATGCATGGCACATAACTGCATTTTGTAGGCCT	1	TSS1500;TSS1500;TSS1500;TSS1500;TSS1500	EIF3K;EIF3K;EIF3K;MAP4K1;MAP4K1	NM_001308393.2_2;NM_001300992.2_2;NM_013234.4_2;NM_007181.6_2;NM_001042600.3_2	chr19:38618792-38619222	N_Shore	TSS1500;TSS1500;TSS1500;TSS1500;TSS1500;TSS1500;TSS1500;TSS1500;TSS1500;TSS1500;TSS1500;TSS1500;TSS1500;TSS1500;TSS1500;TSS1500;TSS1500	ENSG00000104814.13;ENSG00000104814.13;ENSG00000104814.13;ENSG00000104814.13;ENSG00000104814.13;ENSG00000178982.10;ENSG00000178982.10;ENSG00000178982.10;ENSG00000178982.10;ENSG00000178982.10;ENSG00000178982.10;ENSG00000178982.10;ENSG00000178982.10;ENSG00000178982.10;ENSG00000178982.10;ENSG00000178982.10;ENSG00000178982.10	ENST00000591517.5;ENST00000396857.7;ENST00000586296.5;ENST00000588083.5;ENST00000587300.1;ENST00000614624.4;ENST00000593149.5;ENST00000586932.5;ENST00000593062.5;ENST00000538434.5;ENST00000588934.5;ENST00000248342.9;ENST00000545173.6;ENST00000588422.3;ENST00000586513.4;ENST00000591409.5;ENST00000592558.1			19:39108249-39110187	Promoter_Associated	TRUE		EH38D3060199	EH38E1952588|DNase-H3K4me3;EH38E1952588|Low-DNase;EH38E1952588|pELS;EH38E1952588|pELS/CTCF-bound	4;58;24;1	Quies;TxWk;TssFlnkU;TssA;TssFlnkD;TssFlnk;EnhWk;EnhA2;EnhA1;Tx;Het	371;451;697;35;48;34;6;6;5;9;1	cg00233307	cg00233307
cg00233633	cg00233633	-0.0266345	0.00548788	-4.85333	1.21404e-06	0.0100855	cg00233633_TC21	67646849	TTCCTAACCTACTAACCAATCTCCAACTTAATATAACTCAAACTTACATC						cg	R	T	C	2	II	7	29113944	Human	GRCh38	CGATGTAAGTCTGAGCCATATTAAGTTGGAGACTGGCTAGTAGGTCAGGA	AGAATCCTTTAGTGGTGACAAAGAATGTGTCCCCAGTAGGAACCAGTCACTCAAGAAAAG[CG]ATGTAAGTCTGAGCCATATTAAGTTGGAGACTGGCTAGTAGGTCAGGAAGCTTGACTCCT	AGGAGTCAAGCTTCCTGACCTACTAGCCAGTCTCCAACTTAATATGGCTCAGACTTACAT[CG]CTTTTCTTGAGTGACTGGTTCCTACTGGGGACACATTCTTTGTCACCACTAAAGGATTCT	1						TSS200;TSS1500	ENSG00000106066.15;ENSG00000106066.15	ENST00000447426.1;ENST00000448959.5					FALSE		EH38D5840659	EH38E3764674|CTCF-only/CTCF-bound;EH38E3764674|dELS/CTCF-bound;EH38E3764674|DNase-only;EH38E3764674|Low-DNase	14;6;1;66	Quies;TxWk;EnhWk;ReprPCWk;TssFlnkD;EnhA1;ReprPC;TssFlnkU;TssFlnk;EnhA2;TssA;EnhG1;Tx;Het	1229;129;99;118;10;35;3;14;3;18;1;1;2;1	cg00233633
cg00245833	cg00245833	-0.0350933	0.00786484	-4.46205	8.11779e-06	0.0332021	cg00245833_TC21	21769520	AAACCCAAAATTAACCAAACTCCAAAACCTATAATATTAACTATAAACTC						cg	R	T	C	2	II	2	64024175	Human	GRCh38	CGAGCCTATAGTTAATACCACAGGCTTTGGAGTTTGGCCAACCTTGGGCT	TACAAAAAGTGTGAACAATCATGGTTGCCTTTGATGGTAGCAATCATGAAGGGCTACCCT[CG]AGCCTATAGTTAATACCACAGGCTTTGGAGTTTGGCCAACCTTGGGCTTTAAACTTGGCT	AGCCAAGTTTAAAGCCCAAGGTTGGCCAAACTCCAAAGCCTGTGGTATTAACTATAGGCT[CG]AGGGTAGCCCTTCATGATTGCTACCATCAAAGGCAACCATGATTGTTCACACTTTTTGTA	1													FALSE		EH38D3132290	EH38E2003415|dELS;EH38E2003415|Low-DNase	1;86	Quies;TxWk;EnhWk;EnhA2;ReprPCWk;Tx;EnhA1;Het;TssFlnkU	1490;62;41;30;8;2;18;11;1
cg00263146	cg00263146	-0.0350645	0.00792008	-4.4273	9.54216e-06	0.0365108	cg00263146_TC21	60642523	TACAACCCCAAAATAAAAATTATTAAATTCTTCAAATCCAATCTTTATAC						cg	R	T	C	2	II	5	17221862	Human	GRCh38	CGTATAAAGACTGGATTTGAAGAATCTAATAATTCCTATTTTGGGGTTGT	AAGATAAAGTACTCTTTATGTGTTTTGGGGTAATGTTTTTGGAGTGGTTTCTCAGGAAAT[CG]TATAAAGACTGGATTTGAAGAATCTAATAATTCCTATTTTGGGGTTGTAATAAGAACTAC	GTAGTTCTTATTACAACCCCAAAATAGGAATTATTAGATTCTTCAAATCCAGTCTTTATA[CG]ATTTCCTGAGAAACCACTCCAAAAACATTACCCCAAAACACATAAAGAGTACTTTATCTT	1				chr5:17216380-17218526	S_Shelf								FALSE					TssFlnk;Quies;TxWk;ReprPCWk;EnhWk;TssFlnkU;Het;EnhA1;TssFlnkD;TssA;EnhG1;EnhA2;EnhG2;ReprPC;Tx	56;487;649;193;190;30;2;4;24;6;6;8;2;4;2	cg00263146
cg00263899	cg00263899	-0.0361166	0.007357	-4.90914	9.14744e-07	0.00867151	cg00263899_BC21	73740347	ATACAAAAACATAAACAAACTTCACTCTACCCTTTTACATTATTTTACAC						cg	R	B	C	2	II	14	61439472	Human	GRCh38	TACAGGGACATGGACAAACTTCACTCTGCCCTTTTACATTATTTTGCACG	AAGTCCCAGGTGTGTGTGTAGGTGCATGAGTGTGTATGTTTGTTTTCTAAACGAAGCACA[CG]TGCAAAATAATGTAAAAGGGCAGAGTGAAGTTTGTCCATGTCCCTGTATGAAAGTGCATG	AAGTCCCAGGTGTGTGTGTAGGTGCATGAGTGTGTATGTTTGTTTTCTAAACGAAGCACA[CG]TGCAAAATAATGTAAAAGGGCAGAGTGAAGTTTGTCCATGTCCCTGTATGAAAGTGCATG	1											14:61905912-61906287	Unclassified_Cell_type_specific	TRUE		EH38D2726204	EH38E1719523|dELS;EH38E1719523|DNase-only;EH38E1719523|Low-DNase	9;1;77	TxWk;Quies;EnhA1;EnhWk;TssFlnkU;EnhA2;TssFlnk;TssA;ReprPCWk;EnhBiv;TssFlnkD;Tx;EnhG1	485;385;216;257;209;39;11;9;7;1;29;14;1
cg00276606	cg00276606	-0.0269252	0.00546387	-4.92787	8.31315e-07	0.00816616	cg00276606_TC21	33789345	CAACCTAAAAAATCAAAACCAAACAAATCRAACTATTCCCTCATCTAAAC						cg	F	T	C	2	II	3	127822400	Human	GRCh38	CGCCCAGATGAGGGAACAGCCCGATTTGCCTGGTTCTGATTCTCCAGGCT	CACAACCACGACAGCCTGGAGAATCAGAACCAGGCAAATCGGGCTGTTCCCTCATCTGGG[CG]GCCCCAAGGCAGCAGGAAGGCAGCTCCGAGCCCTCTTCCCGCACCCAGACCCTGCCTTTC	CACAACCACGACAGCCTGGAGAATCAGAACCAGGCAAATCGGGCTGTTCCCTCATCTGGG[CG]GCCCCAAGGCAGCAGGAAGGCAGCTCCGAGCCCTCTTCCCGCACCCAGACCCTGCCTTTC	1	exon_1;5UTR;exon_1;5UTR;5UTR;exon_1;exon_1;5UTR	MGLL;MGLL;MGLL;MGLL;MGLL;MGLL;MGLL;MGLL	NM_001256585.2;NM_001256585.2;NM_001388312.1;NM_001388312.1;NM_001388318.1;NM_001388318.1;NM_007283.7;NM_007283.7	chr3:127822427-127823419	N_Shore	exon_1;exon_1;5UTR;5UTR;TSS1500	MGLL;MGLL;MGLL;MGLL;ENSG00000074416.16	ENST00000453507.7;ENST00000265052.10;ENST00000265052.10;ENST00000453507.7;ENST00000494830.1					FALSE		EH38D5490828	EH38E3537924|DNase-H3K4me3;EH38E3537924|DNase-H3K4me3/CTCF-bound;EH38E3537924|Low-DNase;EH38E3537924|pELS;EH38E3537924|pELS/CTCF-bound	7;3;47;25;5	TxWk;Tx;TssBiv;ReprPCWk;TssA;TssFlnkU;EnhBiv;TssFlnk;EnhA1;Quies;TssFlnkD;ReprPC	548;477;392;2;194;203;10;12;1;41;10;8
cg00281967	cg00281967	-0.0103378	0.00218165	-4.73853	2.15278e-06	0.0147145	cg00281967_TC21	33609286	ATTCAATTTCCCRCRCTAAAACTTTTTCAATAATAAACRAACAAAACTCC						cg	F	T	C	2	II	6	31665174	Human	GRCh38	CGGAGCTTTGCTCGTTTACTATTGAAAAAGTTCCAGCGCGGGAAACTGAA	CAAAGCTCCGGGTTCAGTTTCCCGCGCTGGAACTTTTTCAATAGTAAACGAGCAAAGCTC[CG]CGCGCCCAGGTGGCGCGAGCACTAGGATCTGTCGGTTGGGGTCCTACTTTTACATAACGC	CAAAGCTCCGGGTTCAGTTTCCCGCGCTGGAACTTTTTCAATAGTAAACGAGCAAAGCTC[CG]CGCGCCCAGGTGGCGCGAGCACTAGGATCTGTCGGTTGGGGTCCTACTTTTACATAACGC	1	TSS1500;TSS1500;TSS200	CSNK2B;CSNK2B;GPANK1	NM_001282385.2_7;NM_001320.7_7;NM_033177.4_7	chr6:31665038-31666316	Island	exon_1;exon_1;5UTR;5UTR;TSS200;TSS200;TSS200;TSS200;TSS200;TSS1500;TSS1500;TSS1500;TSS1500;TSS1500;TSS1500;TSS1500;TSS1500	GPANK1;GPANK1;GPANK1;GPANK1;ENSG00000204438.11;ENSG00000204435.15;ENSG00000204435.15;ENSG00000204435.15;ENSG00000204435.15;ENSG00000204435.15;ENSG00000204435.15;ENSG00000204435.15;ENSG00000204435.15;ENSG00000204435.15;ENSG00000204435.15;ENSG00000204435.15;ENSG00000263020.6	ENST00000445768.5;ENST00000456540.1;ENST00000445768.5;ENST00000456540.1;ENST00000375896.9;ENST00000677388.1;ENST00000677758.1;ENST00000677536.1;ENST00000375885.8;ENST00000375882.7;ENST00000468255.5;ENST00000465481.6;ENST00000481269.1;ENST00000475875.2;ENST00000375865.6;ENST00000375866.2;ENST00000375880.6			6:31632630-31632991	Promoter_Associated	TRUE		EH38D5743585	EH38E3700778|Low-DNase;EH38E3700778|PLS;EH38E3700778|PLS/CTCF-bound	3;78;6	TxWk;Tx;TssA;TssFlnkU;Quies;EnhG1;EnhWk;EnhA2;TssFlnk	508;283;798;32;8;25;2;6;1	cg00281967
cg00290101	cg00290101	-0.0109987	0.00247488	-4.44413	8.82487e-06	0.0348797	cg00290101_TC21	10600159	TTCAACCCATTTTCTAATTTATTTAATAATATTTATTTCTCTTCTCTTTC						cg	R	T	C	2	II	11	92891576	Human	GRCh38	CGAAAGAGAAGAGAAACAAATATTATTAAACAAACCAGAAAATGGGCTGA	ATTTTGAGCCAATGAAATGAAAATAGTAGTAATGATTGTTGGAAAAGTTAGTCTCTTAGG[CG]AAAGAGAAGAGAAACAAATATTATTAAACAAACCAGAAAATGGGCTGAAGCCTTTTAAAT	ATTTAAAAGGCTTCAGCCCATTTTCTGGTTTGTTTAATAATATTTGTTTCTCTTCTCTTT[CG]CCTAAGAGACTAACTTTTCCAACAATCATTACTACTATTTTCATTTCATTGGCTCAAAAT	1	exon_26;3UTR;exon_28;3UTR	FAT3;FAT3;FAT3;FAT3	NM_001008781.3_2;NM_001008781.3_2;NM_001367949.2_2;NM_001367949.2_2			exon_28;exon_25;exon_8;3UTR;3UTR;3UTR	FAT3;FAT3;FAT3;FAT3;FAT3;FAT3	ENST00000525166.6;ENST00000409404.6;ENST00000533797.1;ENST00000409404.6;ENST00000525166.6;ENST00000533797.1					FALSE		EH38D2483365			Quies;TxWk;Tx;EnhA2;Het;ReprPCWk;EnhWk;EnhA1	1353;240;19;2;3;14;25;7	cg00290101
cg00290101	cg00290101	-0.0109987	0.00247488	-4.44413	8.82487e-06	0.0348797	cg00290101_TC22	52654116	TTCAACCCATTTTCTAATTTATTTAATAATATTTATTTCTCTTCTCTTTC						cg	R	T	C	2	II	11	92891576	Human	GRCh38	CGAAAGAGAAGAGAAACAAATATTATTAAACAAACCAGAAAATGGGCTGA	ATTTTGAGCCAATGAAATGAAAATAGTAGTAATGATTGTTGGAAAAGTTAGTCTCTTAGG[CG]AAAGAGAAGAGAAACAAATATTATTAAACAAACCAGAAAATGGGCTGAAGCCTTTTAAAT	ATTTAAAAGGCTTCAGCCCATTTTCTGGTTTGTTTAATAATATTTGTTTCTCTTCTCTTT[CG]CCTAAGAGACTAACTTTTCCAACAATCATTACTACTATTTTCATTTCATTGGCTCAAAAT	2	exon_26;3UTR;exon_28;3UTR	FAT3;FAT3;FAT3;FAT3	NM_001008781.3_2;NM_001008781.3_2;NM_001367949.2_2;NM_001367949.2_2			exon_28;exon_25;exon_8;3UTR;3UTR;3UTR	FAT3;FAT3;FAT3;FAT3;FAT3;FAT3	ENST00000525166.6;ENST00000409404.6;ENST00000533797.1;ENST00000409404.6;ENST00000525166.6;ENST00000533797.1					FALSE		EH38D2483365			Quies;TxWk;Tx;EnhA2;Het;ReprPCWk;EnhWk;EnhA1	1353;240;19;2;3;14;25;7	cg00290101
cg00292336	cg00292336	-0.0475774	0.0109151	-4.35886	1.30743e-05	0.0441613	cg00292336_BC21	59774231	AAAACTAAAACAATCAAAAACCRCTCTATCTTAAACAAAATACTAAAACC						cg	R	B	C	2	II	7	66967241	Human	GRCh38	AGGCTGAGGCAATCAGGAACCGCTCTGTCTTGGGCAGGATGCTAGAACCG	GTGATGATCAGAAAACCCCAAATTTCCAAAGTGACCTCAAGGGGGTGGCATCACCCACCA[CG]GTTCTAGCATCCTGCCCAAGACAGAGCGGTTCCTGATTGCCTCAGCCTTTGACTTTCGAC	GTGATGATCAGAAAACCCCAAATTTCCAAAGTGACCTCAAGGGGGTGGCATCACCCACCA[CG]GTTCTAGCATCCTGCCCAAGACAGAGCGGTTCCTGATTGCCTCAGCCTTTGACTTTCGAC	1													FALSE		EH38D5860666	EH38E3777319|CTCF-only/CTCF-bound;EH38E3777319|Low-DNase	1;86	Quies;ReprPCWk;TxWk;Het;EnhWk;ZNF/Rpts;EnhA2;ReprPC	1377;30;54;181;2;17;1;1
cg00300969	cg00300969	-0.0358679	0.00733734	-4.8884	1.01661e-06	0.00920662	cg00300969_TC21	31697178	CCTCAACATCTCAAACCAAAATACCTTCTAAAAACCACACCTTATATTAC						cg	R	T	C	2	II	20	32778680	Human	GRCh38	CGCAATACAAGGTGTGGCTTCTAGAAGGTACCCTGGTTTGAGATGCTGAG	GACTGAGCTCACGGTGCCCCCTGGTGGGCGATGCCAGTGGCGCCAGTGCAGCTTGGAGCC[CG]CAATACAAGGTGTGGCTTCTAGAAGGTACCCTGGTTTGAGATGCTGAGGTGGGAGGATCC	GGATCCTCCCACCTCAGCATCTCAAACCAGGGTACCTTCTAGAAGCCACACCTTGTATTG[CG]GGCTCCAAGCTGCACTGGCGCCACTGGCATCGCCCACCAGGGGGCACCGTGAGCTCAGTC	1	TSS1500	DNMT3B	NM_175850.3			TSS1500	ENSG00000088305.19	ENST00000201963.3			20:31365642-31367246	Unclassified	TRUE		EH38D5321524	EH38E3427816|CTCF-only/CTCF-bound;EH38E3427816|DNase-only;EH38E3427816|Low-DNase;EH38E3427816|pELS/CTCF-bound	50;1;31;5	Quies;ReprPCWk;EnhA1;TxWk;EnhWk;EnhA2;EnhG1;ReprPC;Tx;TssFlnkD	878;236;5;343;136;37;23;2;2;1	cg00300969
cg00313477	cg00313477	-0.0265455	0.00605942	-4.38086	1.1821e-05	0.0416912	cg00313477_TC21	93735298	AAAAAACCTATTAAACCCTAAATCTATTTATATCCCTCTACTCAAAACTC						cg	F	T	C	2	II	19	8500522	Human	GRCh38	CGAGTTTTGAGCAGAGGGACACAAACAGACTCAGGGTTCAACAGGCTTCT	GCAGCTGGAGGGAGAAGCCTGTTGAACCCTGAGTCTGTTTGTGTCCCTCTGCTCAAAACT[CG]GCAATGCTTCCTCATGTCCCCACAGTTCAAGCTAAATGCCTCATAAAAGCCTGGGCGAAC	GCAGCTGGAGGGAGAAGCCTGTTGAACCCTGAGTCTGTTTGTGTCCCTCTGCTCAAAACT[CG]GCAATGCTTCCTCATGTCCCCACAGTTCAAGCTAAATGCCTCATAAAAGCCTGGGCGAAC	1				chr19:8498557-8499341	S_Shore								FALSE		EH38D5107409	EH38E3288457|dELS;EH38E3288457|DNase-only;EH38E3288457|Low-DNase	5;3;79	Quies;TxWk;TssFlnkU;ReprPCWk;EnhWk;TssFlnkD;TssFlnk;EnhBiv;EnhA1;Tx;EnhA2;TssA;TssBiv;ReprPC	1057;415;31;15;73;19;19;2;6;4;15;4;2;1
cg00317764	cg00317764	-0.0549168	0.0120237	-4.56739	4.93833e-06	0.0245193	cg00317764_TC21	59807334	CTCACCTTCCCTTAATCAAATAATTAACATATTACCAAATACATTAATTC						cg	R	T	C	2	II	11	35050190	Human	GRCh38	CGAATTAATGCACTTGGTAACATGCCAATTACTTGACCAAGGGAAGGTGA	GTCTAATTAAGCCTCTTTTTCTTCCCAGTCTCTGGTATGCTTTTATCAGCAGCATGAAAA[CG]AATTAATGCACTTGGTAACATGCCAATTACTTGACCAAGGGAAGGTGAGGCACCTTGCTT	AAGCAAGGTGCCTCACCTTCCCTTGGTCAAGTAATTGGCATGTTACCAAGTGCATTAATT[CG]TTTTCATGCTGCTGATAAAAGCATACCAGAGACTGGGAAGAAAAAGAGGCTTAATTAGAC	1													FALSE					Quies;EnhWk;TxWk;Het;ReprPCWk;EnhA2;EnhA1;TssFlnkD;TssFlnkU;ReprPC	1389;77;133;26;7;7;18;4;1;1
cg00318405	cg00318405	-0.03971	0.00887141	-4.47618	7.5992e-06	0.0320236	cg00318405_BC21	10771925	AAAACAACACAACAATAATTAAAATACAAACTCTAAACAAACTACCCTAC						cg	F	B	C	2	II	1	197767966	Human	GRCh38	AGGCAACACAGCAGTAGTTAAAATACAGACTCTGGACAGACTACCCTGCG	CTATGCAATGGGAGGCAACACAGCAGTAGTTAAAATACAGACTCTGGACAGACTACCCTG[CG]CAAGTTTCATCATTTCTCTGTTCTTCAGTTTCTTCATGTGCCAAATGGAAACAAGCATTT	AAATGCTTGTTTCCATTTGGCACATGAAGAAACTGAAGAACAGAGAAATGATGAAACTTG[CG]CAGGGTAGTCTGTCCAGAGTCTGTATTTTAACTACTGCTGTGTTGCCTCCCATTGCATAG	1													FALSE					ZNF/Rpts;Quies;EnhWk;Het;TxWk;EnhA1;ReprPCWk;Tx;TssFlnkU;EnhG2;TssFlnkD;EnhA2;EnhG1	288;772;109;329;141;4;9;2;1;1;3;2;2
cg00326651	cg00326651	-0.0417901	0.00824382	-5.06927	3.99351e-07	0.00545701	cg00326651_BC21	34671930	ATACAAATACTCCTCTACTTATAATAAAATTACTTCCTAATAAACACATC						cg	R	B	C	2	II	1	201861587	Human	GRCh38	TACAGATGCTCCTCTGCTTATGATGGGGTTACTTCCTGATAAACACATCG	AAGCTGTGATGTTCAGTATTAAATTTAAATGCATTTTTAACTTACAGTATTTTCAACTTA[CG]ATGTGTTTATCAGGAAGTAACCCCATCATAAGCAGAGGAGCATCTGTATTGCGTAATTTG	AAGCTGTGATGTTCAGTATTAAATTTAAATGCATTTTTAACTTACAGTATTTTCAACTTA[CG]ATGTGTTTATCAGGAAGTAACCCCATCATAAGCAGAGGAGCATCTGTATTGCGTAATTTG	1													FALSE		EH38D2262623			ReprPCWk;TxWk;Quies;Tx;EnhG2;EnhWk;EnhG1;ReprPC;EnhA1;EnhA2	348;580;202;391;5;3;18;60;2;54
cg00326908	cg00326908	-0.067254	0.0116702	-5.76287	8.26968e-09	0.000556357	cg00326908_TC21	6685309	AATTACACATCTAACTTACAAAACAAATCAAAAACTCTTTATCTTTTCTC						cg	R	T	C	2	II	8	65842885	Human	GRCh38	CGAGAAAAGATAAAGAGCTCTTGACCTGTTTTGTAAGCTAGATGTGTAAT	AAGTAGACTGCATGCCCCTCTACCAAAAGTGTTGTTTGTTGACTTTCGATTTTTCGAAAG[CG]AGAAAAGATAAAGAGCTCTTGACCTGTTTTGTAAGCTAGATGTGTAATTTGAGTGTTCAT	ATGAACACTCAAATTACACATCTAGCTTACAAAACAGGTCAAGAGCTCTTTATCTTTTCT[CG]CTTTCGAAAAATCGAAAGTCAACAAACAACACTTTTGGTAGAGGGGCATGCAGTCTACTT	1	TSS1500	PDE7A	NM_001242318.3	chr8:65841354-65842715	S_Shore	exon_1;TSS1500;TSS1500;TSS1500;TSS1500	PDE7A-DT;ENSG00000205268.11;ENSG00000205268.11;ENSG00000205268.11;ENSG00000205268.11	ENST00000607622.2;ENST00000401827.8;ENST00000396642.7;ENST00000519231.5;ENST00000519626.1					FALSE		EH38D5956682	EH38E3837668|Low-DNase;EH38E3837668|PLS	67;20	Quies;TssFlnkU;TssA;Het;TssFlnk;EnhA2;EnhA1;TssFlnkD;ZNF/Rpts;ReprPC;EnhWk	806;423;364;22;24;16;2;2;1;1;2	cg00326908
cg00331343	cg00331343	-0.0169131	0.00346134	-4.88628	1.0276e-06	0.00921594	cg00331343_TC21	44739211	AAAAAAACRACTAAACCTATCAAATTAAATCCAAAATAAATTTCCTACCC						cg	F	T	C	2	II	3	136862189	Human	GRCh38	CGGGCAGGAAACCCACTCTGGACCCAATCTGATAGGTTCAGTCGCCCCCT	AGGGACCGGGGAAGGGGGCGACTGAACCTATCAGATTGGGTCCAGAGTGGGTTTCCTGCC[CG]CGCGGATCCGCCTGCCCACCGCGCGTGCCCCGCCTCTCTCCCAAGAGCTACGCGGCGGCG	AGGGACCGGGGAAGGGGGCGACTGAACCTATCAGATTGGGTCCAGAGTGGGTTTCCTGCC[CG]CGCGGATCCGCCTGCCCACCGCGCGTGCCCCGCCTCTCTCCCAAGAGCTACGCGGCGGCG	1	TSS200;TSS200;TSS200;TSS200;TSS200	NCK1;NCK1;NCK1-DT;NCK1-DT;NCK1-DT	NM_006153.6;NM_001291999.2;NR_110176.1;NR_110175.1;NR_110177.1	chr3:136862033-136862879	Island	exon_1;exon_1;TSS200;TSS200;TSS200;TSS200;TSS200;TSS200;TSS200;TSS200;TSS200;TSS200;TSS200;TSS200;TSS200;TSS200	NCK1-DT;NCK1-DT;ENSG00000239213.7;ENSG00000239213.7;ENSG00000239213.7;ENSG00000239213.7;ENSG00000239213.7;ENSG00000239213.7;ENSG00000158092.7;ENSG00000158092.7;ENSG00000158092.7;ENSG00000158092.7;ENSG00000158092.7;ENSG00000158092.7;ENSG00000158092.7;ENSG00000158092.7	ENST00000666310.1;ENST00000663856.1;ENST00000661609.1;ENST00000461864.7;ENST00000470236.2;ENST00000667524.1;ENST00000474250.5;ENST00000666660.1;ENST00000288986.6;ENST00000481752.6;ENST00000491539.5;ENST00000485096.5;ENST00000476286.1;ENST00000460960.1;ENST00000478862.1;ENST00000488930.5			3:136580255-136582012	Promoter_Associated	TRUE		EH38D5497204	EH38E3542146|PLS;EH38E3542146|PLS/CTCF-bound	76;11	Quies;TssA;ReprPCWk;TssFlnk;TssFlnkU;Het	807;820;22;7;6;1	cg00331343
cg00343666	cg00343666	-0.0386522	0.00756656	-5.10829	3.25081e-07	0.00482781	cg00343666_TC21	61711320	TCATACACTTAACCTATAACTTTACATATACTACTCCCTCTATATCTTTC						cg	R	T	C	2	II	1	45355818	Human	GRCh38	CGAAAGACACAGAGGGAGCAGCATATGCAAAGTTACAGGTTAAGTGCATG	GAAATGCAGAGAGGAAATAAGGAGTCAGAAAGGATGACCTGGAGTAGCAGGAAAGTAGCA[CG]AAAGACACAGAGGGAGCAGCATATGCAAAGTTACAGGTTAAGTGCATGATGCATTCAGGA	TCCTGAATGCATCATGCACTTAACCTGTAACTTTGCATATGCTGCTCCCTCTGTGTCTTT[CG]TGCTACTTTCCTGCTACTCCAGGTCATCCTTTCTGACTCCTTATTTCCTCTCTGCATTTC	1													FALSE		EH38D2160220			ZNF/Rpts;Quies;Het;TxWk;EnhWk;Tx;ReprPCWk;EnhA2;EnhA1;TssFlnkU;TssFlnkD	311;772;279;204;68;19;3;3;2;1;1
cg00344577	cg00344577	-0.0362464	0.00833094	-4.35082	1.35632e-05	0.045151	cg00344577_BC21	99674353	CAAAAAACACTACAAACTACAAAAACAACCCRAACTCCAAAATCACTACC						cg	R	B	C	2	II	17	81537719	Human	GRCh38	AGGGGACACTGCAGGCTGCAGGGACAGCCCGAGCTCCAGGGTCACTGCCG	AGGCGGGTCCGAGTTAACCCTTGGAGGACCAGGTGCCACCTGGTCCAAGTTGGCAGGGAA[CG]GCAGTGACCCTGGAGCTCGGGCTGTCCCTGCAGCCTGCAGTGTCCCCTGGTGGCAGCCAA	AGGCGGGTCCGAGTTAACCCTTGGAGGACCAGGTGCCACCTGGTCCAAGTTGGCAGGGAA[CG]GCAGTGACCCTGGAGCTCGGGCTGTCCCTGCAGCCTGCAGTGTCCCCTGGTGGCAGCCAA	1				chr17:81536560-81537155	S_Shore						17:79504571-79505120	Unclassified	TRUE		EH38D5050692	EH38E3250636|CTCF-only/CTCF-bound;EH38E3250636|dELS/CTCF-bound;EH38E3250636|DNase-H3K4me3/CTCF-bound;EH38E3250636|Low-DNase	37;7;3;40	EnhBiv;EnhA1;Quies;TssBiv;EnhWk;TssFlnkD;ReprPCWk;ReprPC;TxWk;Tx;TssFlnkU;TssFlnk;EnhA2;EnhG1;EnhG2	575;13;20;22;47;4;26;67;41;1;7;7;1;1;1	cg00344577
cg00346898	cg00346898	-0.0294954	0.00662719	-4.45066	8.56077e-06	0.0342137	cg00346898_TC21	99793192	TAATTCTAACTCCTCTCRTTCTAAAAAAATCCTTCCCATTCCTACAAAAC						cg	F	T	C	2	II	1	231625975	Human	GRCh38	CGTTCTGCAGGAATGGGAAGGATCTCCTTAGAACGAGAGGAGTTAGAACT	CAGCCTTCCTCTAGTTCTAACTCCTCTCGTTCTAAGGAGATCCTTCCCATTCCTGCAGAA[CG]TCTCCCCAACCCTTCTTCTTCACAGTTCTCCCTCCTATCCCTGAACCATTGCAAGAGGTT	CAGCCTTCCTCTAGTTCTAACTCCTCTCGTTCTAAGGAGATCCTTCCCATTCCTGCAGAA[CG]TCTCCCCAACCCTTCTTCTTCACAGTTCTCCCTCCTATCCCTGAACCATTGCAAGAGGTT	1	TSS1500;TSS1500;TSS1500;TSS1500;TSS1500;TSS1500;TSS1500;TSS1500;TSS1500;TSS1500;TSS1500;TSS1500;TSS1500;TSS1500;TSS1500;TSS1500;TSS1500;TSS1500;TSS1500;TSS1500;TSS1500;TSS1500;TSS1500	DISC1;DISC1;DISC1;DISC1;DISC1;DISC1;DISC1;DISC1;DISC1;DISC1;DISC1;DISC1;DISC1;DISC1;DISC1;DISC1;DISC1;DISC1;DISC1;DISC1;DISC1;DISC1;DISC1	NM_001164554.2;NM_001012958.2;NM_001164553.2;NM_001164550.2;NM_001164552.2;NM_001164555.2;NM_001164551.2;NM_001164549.2;NM_001164556.2;NM_001164548.2;NM_001164545.2;NM_001164544.2;NM_001164539.2;NM_001012959.2;NM_001164546.2;NM_001164542.2;NM_001164547.2;NM_001164541.2;NM_001164538.2;NM_001164540.2;NM_001012957.2;NM_018662.3;NM_001164537.2	chr1:231626712-231627369	N_Shore	TSS1500;TSS1500;TSS1500;TSS1500;TSS1500;TSS1500;TSS1500;TSS1500;TSS1500;TSS1500;TSS1500;TSS1500;TSS1500;TSS1500;TSS1500;TSS1500;TSS1500;TSS1500;TSS1500;TSS1500	ENSG00000162946.23;ENSG00000162946.23;ENSG00000162946.23;ENSG00000162946.23;ENSG00000162946.23;ENSG00000162946.23;ENSG00000162946.23;ENSG00000162946.23;ENSG00000162946.23;ENSG00000162946.23;ENSG00000162946.23;ENSG00000162946.23;ENSG00000162946.23;ENSG00000162946.23;ENSG00000162946.23;ENSG00000162946.23;ENSG00000162946.23;ENSG00000162946.23;ENSG00000162946.23;ENSG00000162946.23	ENST00000439617.8;ENST00000317586.8;ENST00000602873.5;ENST00000602700.5;ENST00000602822.5;ENST00000535944.5;ENST00000539444.5;ENST00000295051.11;ENST00000602281.5;ENST00000366633.7;ENST00000366632.6;ENST00000602713.5;ENST00000537876.5;ENST00000366636.8;ENST00000628350.2;ENST00000535983.5;ENST00000366637.8;ENST00000620189.3;ENST00000622252.4;ENST00000422590.6					FALSE					Quies;EnhWk;ReprPC;TssFlnkU;ReprPCWk;TssFlnkD;TssFlnk;EnhBiv;EnhA1;TxWk;EnhA2;TssA;TssBiv;Het	860;398;10;36;163;77;14;38;46;7;10;1;2;1	cg00346898
cg00347893	cg00347893	-0.0442943	0.00979313	-4.523	6.09707e-06	0.0279693	cg00347893_TC21	86607114	AAAACAAAAAACAAAACCCAAATCTTCTAATATTTATTTCACCRTTACAC						cg	F	T	C	2	II	12	8032164	Human	GRCh38	CGTGTAACGGTGAAATAAACATCAGAAGATCTGGGTCCTGTTCCTTGTTT	TTTAGGAAGCTGAAACAAGGAACAGGACCCAGATCTTCTGATGTTTATTTCACCGTTACA[CG]CTCATTTATCATGTATCCACTCATTCAAGGAGCATTTACTGAATTCCAGGATGATATAAG	TTTAGGAAGCTGAAACAAGGAACAGGACCCAGATCTTCTGATGTTTATTTCACCGTTACA[CG]CTCATTTATCATGTATCCACTCATTCAAGGAGCATTTACTGAATTCCAGGATGATATAAG	1	TSS1500	FOXJ2	NM_018416.3	chr12:8032368-8033020	N_Shore	TSS1500;TSS1500	ENSG00000065970.9;ENSG00000065970.9	ENST00000162391.8;ENST00000428177.2			12:8184565-8186397	Promoter_Associated	TRUE		EH38D4670071	EH38E3002008|Low-DNase;EH38E3002008|pELS	84;3	Quies;TssFlnkU;TssFlnk;TssA;TxWk;EnhA2;TssFlnkD;ReprPCWk;EnhWk;EnhA1;TssBiv	807;623;35;79;10;14;51;20;7;15;2
cg00350448	cg00350448	-0.0396178	0.007725	-5.12852	2.92034e-07	0.00456495	cg00350448_BC21	99795949	CRCAAACATAAACCCTATAAACTAACTTCCCTAAAAATAACAAAAAAATC						cg	R	B	C	2	II	11	72722821	Human	GRCh38	GCAGACATGAGCCCTGTGAACTGGCTTCCCTGAGGGTGGCAGAGGGGTCG	AAAGGCCAGAGCAAGCTGGGAGGGGATCTGCGGCATGACCCTGGAACCTCACATCAGAAA[CG]ACCCCTCTGCCACCCTCAGGGAAGCCAGTTCACAGGGCTCATGTCTGCGGCATTTAAGAG	AAAGGCCAGAGCAAGCTGGGAGGGGATCTGCGGCATGACCCTGGAACCTCACATCAGAAA[CG]ACCCCTCTGCCACCCTCAGGGAAGCCAGTTCACAGGGCTCATGTCTGCGGCATTTAAGAG	1	TSS1500;TSS1500;TSS1500;TSS1500	ARAP1;ARAP1;ARAP1;ARAP1	NM_015242.5;NM_001369489.1;NM_001135190.2;NR_161388.1	chr11:72726631-72726960	N_Shelf	TSS1500;TSS1500;TSS1500;TSS1500	ENSG00000186635.15;ENSG00000186635.15;ENSG00000186635.15;ENSG00000186635.15	ENST00000465814.5;ENST00000334211.12;ENST00000426523.5;ENST00000429686.5			11:72432591-72434003	Promoter_Associated	TRUE					Quies;TssFlnkU;Het;EnhA1;EnhA2;ZNF/Rpts;TxWk;ReprPCWk;Tx;EnhWk;TssFlnk;EnhG1;TssFlnkD;EnhBiv;ReprPC;TssA;EnhG2	403;442;118;285;55;55;195;15;28;35;1;4;5;6;5;5;6	cg00350448
cg00356204	cg00356204	-0.0221299	0.00470323	-4.70526	2.53541e-06	0.016246	cg00356204_BC21	14802219	CRACCTTTTAATACCTCATTCTTTAATATAAAATAAAACTTCTCATCCTC						cg	R	B	C	2	II	1	95043464	Human	GRCh38	GGCCTTTTAATGCCTCATTCTTTAATGTGAAGTAGGGCTTCTCATCCTCG	GTAACACACAGGACATTCCCCTACAATGAAGATTTGTCTGTCCCAAAATGTCAATAGTGA[CG]AGGATGAGAAGCCCTACTTCACATTAAAGAATGAGGCATTAAAAGGCCGACTGCAGGCTC	GTAACACACAGGACATTCCCCTACAATGAAGATTTGTCTGTCCCAAAATGTCAATAGTGA[CG]AGGATGAGAAGCCCTACTTCACATTAAAGAATGAGGCATTAAAAGGCCGACTGCAGGCTC	1											1:95508812-95509390	Unclassified	TRUE		EH38D4403506	EH38E2826101|CTCF-only/CTCF-bound;EH38E2826101|dELS/CTCF-bound;EH38E2826101|Low-DNase	63;16;8	Quies;Het;TxWk;EnhA2;TssFlnkD;ZNF/Rpts;EnhWk;EnhA1;ReprPCWk;TssFlnk;TssA	1226;233;33;53;1;51;47;6;9;2;2
cg00361040	cg00361040	-0.0669508	0.0128517	-5.2095	1.89354e-07	0.00347258	cg00361040_TC21	59730147	AAAAACCCTCTCCCRAATTTTACTAATCCTATAATTTTCTAATATTTAAC						cg	F	T	C	2	II	13	72780829	Human	GRCh38	CGTTAAATATCAGAAAACCACAGGATTAGCAAAATTCGGGAGAGGGTTCC	AAATTACTCACAGGAACCCTCTCCCGAATTTTGCTAATCCTGTGGTTTTCTGATATTTAA[CG]TAATATTCCTCCTACCTATGGTGCTCATTAGTGAAAGTATAGAAATGCTTCTCTTGGTTA	AAATTACTCACAGGAACCCTCTCCCGAATTTTGCTAATCCTGTGGTTTTCTGATATTTAA[CG]TAATATTCCTCCTACCTATGGTGCTCATTAGTGAAAGTATAGAAATGCTTCTCTTGGTTA	1	TSS1500;TSS1500;TSS1500;TSS1500	PIBF1;PIBF1;PIBF1;PIBF1	NM_006346.4;NM_001349655.2;NR_146206.2;NR_146205.2	chr13:72781565-72782474	N_Shore	TSS1500;TSS1500;TSS1500;TSS1500	ENSG00000083535.16;ENSG00000083535.16;ENSG00000083535.16;ENSG00000083535.16	ENST00000326291.11;ENST00000617689.4;ENST00000489797.1;ENST00000615625.1					FALSE		EH38D4775428			Quies;TssFlnkD;TssFlnk;TssFlnkU;EnhWk;ReprPCWk;TxWk;Het;TssA;EnhG2;EnhA1	818;538;170;59;33;3;28;5;7;1;1
cg00369658	cg00369658	-0.0324095	0.00697821	-4.64439	3.41085e-06	0.019674	cg00369658_TC21	87722906	AACTCACACCAACRATCAATCTTCCTTAATTTATAACTAAACAATATCCC						cg	F	T	C	2	II	11	57597615	Human	GRCh38	CGGGACACTGCCCAGTTACAAATTAAGGAAGATTGATCGCTGGTGTGAGT	TGATTTACAGGAACTCACACCAGCGATCAATCTTCCTTAATTTGTAACTGGGCAGTGTCC[CG]GGCCAGCCAATAGCTAAGACTGCCCCCCCCGCACCCCACCCTCCCTGACCCTGGGGGACT	TGATTTACAGGAACTCACACCAGCGATCAATCTTCCTTAATTTGTAACTGGGCAGTGTCC[CG]GGCCAGCCAATAGCTAAGACTGCCCCCCCCGCACCCCACCCTCCCTGACCCTGGGGGACT	1	TSS1500;TSS200	SERPING1;SERPING1	NM_001032295.2;NM_000062.3			exon_1;5UTR;TSS200;TSS200;TSS200;TSS200;TSS200;TSS200;TSS200;TSS200;TSS200;TSS200;TSS1500;TSS1500;TSS1500;TSS1500;TSS1500;TSS1500;TSS1500;TSS1500;TSS1500	SERPING1;SERPING1;ENSG00000149131.17;ENSG00000149131.17;ENSG00000149131.17;ENSG00000149131.17;ENSG00000149131.17;ENSG00000149131.17;ENSG00000149131.17;ENSG00000149131.17;ENSG00000149131.17;ENSG00000149131.17;ENSG00000149131.17;ENSG00000149131.17;ENSG00000149131.17;ENSG00000149131.17;ENSG00000149131.17;ENSG00000149131.17;ENSG00000149131.17;ENSG00000149131.17;ENSG00000149131.17	ENST00000619430.2;ENST00000619430.2;ENST00000457869.1;ENST00000340687.10;ENST00000677275.1;ENST00000278407.9;ENST00000677915.1;ENST00000677856.1;ENST00000677624.1;ENST00000378323.8;ENST00000378324.6;ENST00000403558.1;ENST00000677625.1;ENST00000678592.1;ENST00000676670.1;ENST00000678533.1;ENST00000531605.2;ENST00000528996.2;ENST00000531797.5;ENST00000531133.5;ENST00000676741.1					FALSE		EH38D4605488	EH38E2958807|Low-DNase;EH38E2958807|PLS	39;48	Quies;ReprPCWk;TssA;ReprPC;TssFlnkU;TssFlnk;EnhA1;EnhWk;TssFlnkD;EnhA2;EnhBiv;TssBiv;TxWk	815;119;459;56;62;65;11;16;9;34;4;10;3	cg00369658
cg00372278	cg00372278	-0.0156488	0.00349501	-4.47747	7.55328e-06	0.0319003	cg00372278_BC21	61736246	AATTTAAAACACCTCAAAAAACAAATTAAAACCAAAAACCTATCAATCCC						cg	F	B	C	2	II	4	139083135	Human	GRCh38	ATTTGGAACACCTCAGAGAGCAGATTGGAACCAGAGGCCTGTCAATCCCG	ATCAACGTTCTAATTTGGAACACCTCAGAGAGCAGATTGGAACCAGAGGCCTGTCAATCC[CG]TCCGTTCTGTCCTTTCCGAGGCGCTTCCGCTGTGGTGGGAGGTTTGGGGGGGGGTAGAGG	CCTCTACCCCCCCCCAAACCTCCCACCACAGCGGAAGCGCCTCGGAAAGGACAGAACGGA[CG]GGATTGACAGGCCTCTGGTTCCAATCTGCTCTCTGAGGTGTTCCAAATTAGAACGTTGAT	1				chr4:139082914-139083165;chr4:139083564-139084652	Island;N_Shore				chr4:139082584-139083294		4:140004010-140004546	Promoter_Associated	TRUE		EH38D5598808	EH38E3606117|pELS;EH38E3606117|pELS/CTCF-bound	76;11	Quies;TssA;TxWk;TssFlnk;EnhWk;EnhA2;EnhA1;ReprPCWk;EnhG1;TssFlnkU;Tx	787;774;30;54;7;4;1;1;2;2;1	cg00372278
cg00380954	cg00380954	-0.0405036	0.00881783	-4.59337	4.36149e-06	0.0228394	cg00380954_BC21	61808383	ATAACAATACCTTTACATTTTTCTCATAATCATTTTACCATCTTCACATC						cg	F	B	C	2	II	1	194834578	Human	GRCh38	TGGCAATGCCTTTACATTTTTCTCATGGTCATTTTGCCATCTTCACATCG	AAGTATCCACAATGGCAATGCCTTTACATTTTTCTCATGGTCATTTTGCCATCTTCACAT[CG]TTGAATGATAAACTATTCATTTTGGAAAGAAAAATAAGAAAAGATAATTTAACAACAGAT	ATCTGTTGTTAAATTATCTTTTCTTATTTTTCTTTCCAAAATGAATAGTTTATCATTCAA[CG]ATGTGAAGATGGCAAAATGACCATGAGAAAAATGTAAAGGCATTGCCATTGTGGATACTT	1													FALSE					Quies;Het;EnhWk;TxWk	1637;18;4;4
cg00382138	cg00382138	-0.0728245	0.0145939	-4.99007	6.03577e-07	0.00684816	cg00382138_TC21	53654960	TCACCTCCCTCAACTCTTTAATAAAAAAACCATTTTTTAATTTCAATTAC						cg	R	T	C	2	II	4	109802143	Human	GRCh38	CGTAACTGAAACCAAAAAATGGCCTTCCCATTAAAGAGCTGAGGGAGGTG	CTAAAGAGCTTTGTACTTTTGAACTCTGAAAGAATTTGGCTGAAATCCAGAGAGATTTAC[CG]TAACTGAAACCAAAAAATGGCCTTCCCATTAAAGAGCTGAGGGAGGTGACCAATAGGAAC	GTTCCTATTGGTCACCTCCCTCAGCTCTTTAATGGGAAGGCCATTTTTTGGTTTCAGTTA[CG]GTAAATCTCTCTGGATTTCAGCCAAATTCTTTCAGAGTTCAAAAGTACAAAGCTCTTTAG	1	TSS200;TSS200;TSS200;TSS200;TSS200;TSS200;TSS200;TSS200;TSS200;TSS200;TSS200;TSS200;TSS200	CFI;CFI;CFI;CFI;CFI;CFI;CFI;CFI;CFI;CFI;CFI;CFI;CFI	NM_001318057.2;NM_000204.5;NM_001331035.2;NM_001375283.1;NM_001375284.1;NM_001375278.1;NM_001375279.1;NM_001375281.1;NM_001375280.1;NM_001375282.1;NR_164672.1;NR_164671.1;NR_164673.1			exon_1;exon_1;TSS200;TSS200;TSS200;TSS200;TSS200;TSS200	CFI;CFI;ENSG00000285330.1;ENSG00000205403.15;ENSG00000205403.15;ENSG00000205403.15;ENSG00000205403.15;ENSG00000205403.15	ENST00000695844.1;ENST00000695845.1;ENST00000645635.1;ENST00000394634.7;ENST00000394635.8;ENST00000512148.5;ENST00000510800.1;ENST00000643384.1					FALSE		EH38D5587456	EH38E3599622|DNase-only;EH38E3599622|Low-DNase;EH38E3599622|PLS	3;82;2	Quies;TssFlnk;ReprPCWk;EnhWk;EnhA2;EnhA1;TxWk;TssA;ReprPC;TssFlnkD	1408;107;28;22;41;15;26;12;1;3	cg00382138
cg00385640	cg00385640	-0.0368423	0.00718277	-5.12925	2.90895e-07	0.00456048	cg00385640_BC21	48753861	AAACAATTAATTAACACCCRAATTTCATCATTATAACCCAAACTTCTAAC						cg	F	B	C	2	II	8	123878440	Human	GRCh38	GGCAATTGATTAACACCCGAATTTCATCATTGTGGCCCAAGCTTCTGACG	AGTTAAATATTGGGCAATTGATTAACACCCGAATTTCATCATTGTGGCCCAAGCTTCTGA[CG]TACCCATCACCTCTCAGGGAGCCAACACTGTCCTCCACCTCAATAATTTCTGACTTTTGT	ACAAAAGTCAGAAATTATTGAGGTGGAGGACAGTGTTGGCTCCCTGAGAGGTGATGGGTA[CG]TCAGAAGCTTGGGCCACAATGATGAAATTCGGGTGTTAATCAATTGCCCAATATTTAACT	1													FALSE					Quies;ReprPC;EnhA1;TxWk;EnhWk;Tx;EnhA2;TssFlnkU;EnhG1;ReprPCWk;TssFlnkD;Het	635;1;395;277;105;87;116;10;3;31;1;2
cg00386725	cg00386725	-0.0316016	0.00732069	-4.31674	1.58347e-05	0.049468	cg00386725_TC21	3802585	CTTAAATAAAATAAAAACTTCATATCCTCTCTCCTAACCCATCCCAAAAC						cg	F	T	C	2	II	1	18291297	Human	GRCh38	CGTCTTGGGATGGGCCAGGAGAGAGGACATGAAGTCCCCATTTCACCTAA	ACTTCCGCATTCTTAGGTGAAATGGGGACTTCATGTCCTCTCTCCTGGCCCATCCCAAGA[CG]AGGGCAAGTGCCCCACGCTGTCCCCGTCTGCATCGCCCGTGCCGGGATGTTGGATTCCTG	ACTTCCGCATTCTTAGGTGAAATGGGGACTTCATGTCCTCTCTCCTGGCCCATCCCAAGA[CG]AGGGCAAGTGCCCCACGCTGTCCCCGTCTGCATCGCCCGTGCCGGGATGTTGGATTCCTG	1													FALSE					ReprPCWk;ReprPC;Quies;EnhA2;TxWk;ZNF/Rpts;EnhWk;Het;EnhA1;EnhBiv;EnhG1	692;330;565;8;12;5;26;20;1;3;1	cg00386725
cg00405078	cg00405078	-0.0280327	0.0062697	-4.47114	7.78048e-06	0.0323839	cg00405078_TC21	50609387	ATCAATCAACTATATAACCATCTACAAATCACTTAACCACTCTAAACCTC						cg	F	T	C	2	II	6	34537113	Human	GRCh38	CGAGGCTCAGAGTGGTTAAGTGACTTGCAGATGGTCACACAGCTGATTGA	TGAGTTATTCTGTCAATCAGCTGTGTGACCATCTGCAAGTCACTTAACCACTCTGAGCCT[CG]GTTTCATCATCTGCAAAATGGGGGAGTAGCCCCTACTTCATAGTTTTGTTGGGAAGATAA	TGAGTTATTCTGTCAATCAGCTGTGTGACCATCTGCAAGTCACTTAACCACTCTGAGCCT[CG]GTTTCATCATCTGCAAAATGGGGGAGTAGCCCCTACTTCATAGTTTTGTTGGGAAGATAA	1													FALSE					Quies;TxWk;EnhA2;ReprPCWk;EnhWk;EnhA1;ReprPC;Tx;EnhBiv;TssFlnkD;Het	1124;49;22;247;69;59;81;2;6;1;3	cg00405078
cg00405626	cg00405626	-0.0143994	0.00239735	-6.00639	1.897e-09	0.000223698	cg00405626_TC21	84807467	CTAACAAAAAAAATTTCCTATCATTTTCTCTAACCTCTAAAACATTTAAC						cg	F	T	C	2	II	14	24271933	Human	GRCh38	CGTCAAATGCTTCAGAGGTTAGAGAAAATGACAGGAAACTCCCCCTGTTA	AGATGTCAAATCTAACAGGGGGAGTTTCCTGTCATTTTCTCTAACCTCTGAAGCATTTGA[CG]CTACCCATTTCTTTATACTTGACACCCCCATTCTGGCTTCTCCTCCTGCACCTCTGCCTC	AGATGTCAAATCTAACAGGGGGAGTTTCCTGTCATTTTCTCTAACCTCTGAAGCATTTGA[CG]CTACCCATTTCTTTATACTTGACACCCCCATTCTGGCTTCTCCTCCTGCACCTCTGCCTC	1	TSS1500;TSS1500	RABGGTA;RABGGTA	NM_182836.3_2;NM_004581.5_2	chr14:24271358-24271736	S_Shore	exon_1;TSS1500;TSS1500;TSS1500;TSS1500;TSS1500;TSS1500;TSS1500;TSS1500;TSS1500;TSS1500;TSS1500;TSS1500;TSS1500;TSS1500	ENSG00000286825;ENSG00000100949.15;ENSG00000100949.15;ENSG00000100949.15;ENSG00000100949.15;ENSG00000100949.15;ENSG00000100949.15;ENSG00000100949.15;ENSG00000100949.15;ENSG00000100949.15;ENSG00000100949.15;ENSG00000100949.15;ENSG00000100949.15;ENSG00000100949.15;ENSG00000100949.15	ENST00000654775.1;ENST00000216840.11;ENST00000399409.7;ENST00000559551.5;ENST00000559974.5;ENST00000558376.5;ENST00000560998.5;ENST00000543002.5;ENST00000558534.5;ENST00000558936.5;ENST00000559586.5;ENST00000560127.1;ENST00000558954.5;ENST00000560163.1;ENST00000560207.1			14:24739839-24741475	Promoter_Associated	TRUE					Quies;TssFlnkU;TssA;EnhA1;Het;TssFlnk;ReprPCWk;EnhA2;TssFlnkD;EnhWk;ZNF/Rpts;TxWk;TssBiv	734;590;164;9;53;44;34;10;15;4;4;1;1
cg00405728	cg00405728	-0.0328341	0.0060335	-5.44197	5.26939e-08	0.0016014	cg00405728_BC21	90741179	AACATTTTAAAATATATTTTTTCAATCACTCCTCTTCCAACCATTTATCC						cg	F	B	C	2	II	1	27660377	Human	GRCh38	GCATTTTAAAATGTATTTTTTCAATCACTCCTCTTCCAGCCATTTATCCG	AATGCAGCCAGGGCATTTTAAAATGTATTTTTTCAATCACTCCTCTTCCAGCCATTTATC[CG]TCCGTCTGTATGTATGTCTATCCAGTCAGCCAAAGTAATTGGGTGCCTCCTGAGTGCCAG	CTGGCACTCAGGAGGCACCCAATTACTTTGGCTGACTGGATAGACATACATACAGACGGA[CG]GATAAATGGCTGGAAGAGGAGTGATTGAAAAAATACATTTTAAAATGCCCTGGCTGCATT	1	exon_2	LINC02574	NR_151722.1	chr1:27659794-27660297	S_Shore	exon_2	LINC02574	ENST00000440492.1					FALSE					Tx;TssFlnkU;TxWk;TssA;TssFlnkD;EnhA1;EnhG1;EnhWk;TssFlnk;TssBiv;EnhA2;Quies	695;604;119;113;25;15;13;6;36;4;17;16
cg00411579	cg00411579	-0.0386468	0.00698845	-5.53009	3.20065e-08	0.00117203	cg00411579_BC21	48768437	ATCCCAAAAAACACTAAAAAACCTTTTATAACCATAATTCAATCTACCTC						cg	F	B	C	2	II	10	70317773	Human	GRCh38	TCCCAGGGGACACTGAGAAGCCTTTTGTGACCATGGTTCAATCTGCCTCG	ACAGGCAGTCAGTCCCAGGGGACACTGAGAAGCCTTTTGTGACCATGGTTCAATCTGCCT[CG]TGAGCCCAGAGGAAGTTCTGAGGGCAGCTGGCACTGGCAGGTCAAGGCACCCTCCCTGGC	GCCAGGGAGGGTGCCTTGACCTGCCAGTGCCAGCTGCCCTCAGAACTTCCTCTGGGCTCA[CG]AGGCAGATTGAACCATGGTCACAAAAGGCTTCTCAGTGTCCCCTGGGACTGACTGCCTGT	1													FALSE		EH38D4523111	EH38E2906178|dELS;EH38E2906178|DNase-only;EH38E2906178|Low-DNase	1;2;84	Quies;TxWk;ReprPCWk;EnhA1;ReprPC;Het;EnhWk;EnhA2;Tx;EnhG1;TssFlnkU;EnhBiv	1280;114;155;22;20;1;19;40;7;2;2;1
cg00414854	cg00414854	-0.0349974	0.00809761	-4.32194	1.54662e-05	0.0487126	cg00414854_BC21	66700462	AATTAAAAATCAAAACATTCATAATCCAAATCATTCTAATTCCCAAACCC						cg	F	B	C	2	II	9	14331295	Human	GRCh38	ATTGAAGGTCAGAGCATTCATGATCCAGGTCATTCTAATTCCCAAGCCCG	ACTGAGTAACCAATTGAAGGTCAGAGCATTCATGATCCAGGTCATTCTAATTCCCAAGCC[CG]TTGCCATAGCTTAATAGTTTATGCAGCAAGGACATGAAACTACTAGATGAATGGGGCCCA	TGGGCCCCATTCATCTAGTAGTTTCATGTCCTTGCTGCATAAACTATTAAGCTATGGCAA[CG]GGCTTGGGAATTAGAATGACCTGGATCATGAATGCTCTGACCTTCAATTGGTTACTCAGT	1													FALSE		EH38D6013769			Quies;ReprPCWk;ReprPC;TxWk;EnhA2;EnhWk;EnhBiv;EnhA1	654;833;90;28;26;26;2;4
cg00418799	cg00418799	-0.110595	0.0245355	-4.50754	6.55826e-06	0.0292921	cg00418799_TC21	19630847	AACACTAACCTTTTACCAAACACTAATAAAAATTTTACATAAATTTTCTC						cg	F	T	C	2	II	6	169589323	Human	GRCh38	CGAGAAAATTTATGTAAAATTCTTATCAGTGCCTGGCAAAAGGTCAGTGT	AGTACTTTCTGGACACTGACCTTTTGCCAGGCACTGATAAGAATTTTACATAAATTTTCT[CG]TGTAACCCTCTCAACAGCACTATGAAGAAAACACTTATTGCCCCAATTCTATAGACAAGG	AGTACTTTCTGGACACTGACCTTTTGCCAGGCACTGATAAGAATTTTACATAAATTTTCT[CG]TGTAACCCTCTCAACAGCACTATGAAGAAAACACTTATTGCCCCAATTCTATAGACAAGG	1													FALSE		EH38D3934032	EH38E2526420|dELS;EH38E2526420|DNase-only;EH38E2526420|Low-DNase	7;2;78	Quies;ReprPC;EnhA2;EnhWk;TxWk;EnhA1;ReprPCWk;Het;Tx	1085;2;133;137;119;148;29;9;1
cg00439750	cg00439750	-0.0647033	0.0112491	-5.75189	8.82517e-09	0.000570167	cg00439750_TC21	12758155	AAAACTAAACTACTAAATAAAACTTCTAAACACAAACTCCAAAAAATCAC						cg	R	T	C	2	II	11	100961834	Human	GRCh38	CGTGATTTCTTGGAGCCTGTGTCCAGAAGCTTCACTCAGTAGCTCAGTTC	GAGGGTTTAACTCCTGGTACTCTGGATGTAATCTCTGACTCACCCCTTGAGTAGTAACCA[CG]TGATTTCTTGGAGCCTGTGTCCAGAAGCTTCACTCAGTAGCTCAGTTCCCTTACATAAGG	CCTTATGTAAGGGAACTGAGCTACTGAGTGAAGCTTCTGGACACAGGCTCCAAGAAATCA[CG]TGGTTACTACTCAAGGGGTGAGTCAGAGATTACATCCAGAGTACCAGGAGTTAAACCCTC	1													FALSE		EH38D4638550			Quies;TxWk;Tx;Het;EnhWk;EnhA2;ReprPCWk;EnhG1	1405;202;37;9;4;3;2;1
cg00450651	cg00450651	-0.0310183	0.00715503	-4.33517	1.45645e-05	0.0468395	cg00450651_BC21	43745117	CACCCTTAAACCAATCTCATTTTCTCACCTCCAACTAAAAATTAATAAAC						cg	F	B	C	2	II	5	140106317	Human	GRCh38	ACCCTTAAGCCAGTCTCATTTTCTCACCTCCAGCTAGGAATTAATAAGCG	AAATGACCCATCACCCTTAAGCCAGTCTCATTTTCTCACCTCCAGCTAGGAATTAATAAG[CG]TGTTGCTGTTGTTGTTGTCATTAACAGGGAAGTTGAACTGTTTCGCAATCACTTATTTCT	AGAAATAAGTGATTGCGAAACAGTTCAACTTCCCTGTTAATGACAACAACAACAGCAACA[CG]CTTATTAATTCCTAGCTGGAGGTGAGAAAATGAGACTGGCTTAAGGGTGATGGGTCATTT	1	exon_1;exon_2;exon_2	MALINC1;MALINC1;MALINC1	NR_102739.1;NR_102740.1;NR_102741.1	chr5:140107346-140108279	N_Shore	exon_3;exon_3;exon_2;exon_2;exon_2;exon_2;exon_2;exon_1;exon_2;exon_3;exon_1;exon_1;exon_1;TSS1500;TSS1500	MALINC1;MALINC1;MALINC1;MALINC1;MALINC1;MALINC1;MALINC1;MALINC1;MALINC1;MALINC1;MALINC1;MALINC1;MALINC1;ENSG00000185129.8;ENSG00000185129.8	ENST00000663778.1;ENST00000660071.1;ENST00000654348.1;ENST00000656599.1;ENST00000522747.6;ENST00000653092.1;ENST00000521563.6;ENST00000499203.7;ENST00000659960.1;ENST00000659306.1;ENST00000520928.1;ENST00000518790.2;ENST00000668151.1;ENST00000505703.2;ENST00000651386.1					FALSE		EH38D3767168	EH38E2413999|CTCF-only/CTCF-bound;EH38E2413999|DNase-only;EH38E2413999|Low-DNase;EH38E2413999|pELS/CTCF-bound	1;1;84;1	Quies;TssFlnk;ReprPC;ReprPCWk;EnhA1;EnhA2;EnhWk;EnhBiv;TssFlnkD;TxWk;Het;TssA	837;78;328;273;8;43;51;34;1;5;4;1	cg00450651
cg00450651	cg00450651	-0.0310183	0.00715503	-4.33517	1.45645e-05	0.0468395	cg00450651_BC23	69604400	CACCCTTAAACCAATCTCATTTTCTCACCTCCAACTAAAAATTAATAAAC						cg	F	B	C	2	II	5	140106317	Human	GRCh38	ACCCTTAAGCCAGTCTCATTTTCTCACCTCCAGCTAGGAATTAATAAGCG	AAATGACCCATCACCCTTAAGCCAGTCTCATTTTCTCACCTCCAGCTAGGAATTAATAAG[CG]TGTTGCTGTTGTTGTTGTCATTAACAGGGAAGTTGAACTGTTTCGCAATCACTTATTTCT	AGAAATAAGTGATTGCGAAACAGTTCAACTTCCCTGTTAATGACAACAACAACAGCAACA[CG]CTTATTAATTCCTAGCTGGAGGTGAGAAAATGAGACTGGCTTAAGGGTGATGGGTCATTT	3	exon_1;exon_2;exon_2	MALINC1;MALINC1;MALINC1	NR_102739.1;NR_102740.1;NR_102741.1	chr5:140107346-140108279	N_Shore	exon_3;exon_3;exon_2;exon_2;exon_2;exon_2;exon_2;exon_1;exon_2;exon_3;exon_1;exon_1;exon_1;TSS1500;TSS1500	MALINC1;MALINC1;MALINC1;MALINC1;MALINC1;MALINC1;MALINC1;MALINC1;MALINC1;MALINC1;MALINC1;MALINC1;MALINC1;ENSG00000185129.8;ENSG00000185129.8	ENST00000663778.1;ENST00000660071.1;ENST00000654348.1;ENST00000656599.1;ENST00000522747.6;ENST00000653092.1;ENST00000521563.6;ENST00000499203.7;ENST00000659960.1;ENST00000659306.1;ENST00000520928.1;ENST00000518790.2;ENST00000668151.1;ENST00000505703.2;ENST00000651386.1					FALSE		EH38D3767168	EH38E2413999|CTCF-only/CTCF-bound;EH38E2413999|DNase-only;EH38E2413999|Low-DNase;EH38E2413999|pELS/CTCF-bound	1;1;84;1	Quies;TssFlnk;ReprPC;ReprPCWk;EnhA1;EnhA2;EnhWk;EnhBiv;TssFlnkD;TxWk;Het;TssA	837;78;328;273;8;43;51;34;1;5;4;1	cg00450651
cg00450651	cg00450651	-0.0310183	0.00715503	-4.33517	1.45645e-05	0.0468395	cg00450651_BC22	13620566	CACCCTTAAACCAATCTCATTTTCTCACCTCCAACTAAAAATTAATAAAC						cg	F	B	C	2	II	5	140106317	Human	GRCh38	ACCCTTAAGCCAGTCTCATTTTCTCACCTCCAGCTAGGAATTAATAAGCG	AAATGACCCATCACCCTTAAGCCAGTCTCATTTTCTCACCTCCAGCTAGGAATTAATAAG[CG]TGTTGCTGTTGTTGTTGTCATTAACAGGGAAGTTGAACTGTTTCGCAATCACTTATTTCT	AGAAATAAGTGATTGCGAAACAGTTCAACTTCCCTGTTAATGACAACAACAACAGCAACA[CG]CTTATTAATTCCTAGCTGGAGGTGAGAAAATGAGACTGGCTTAAGGGTGATGGGTCATTT	2	exon_1;exon_2;exon_2	MALINC1;MALINC1;MALINC1	NR_102739.1;NR_102740.1;NR_102741.1	chr5:140107346-140108279	N_Shore	exon_3;exon_3;exon_2;exon_2;exon_2;exon_2;exon_2;exon_1;exon_2;exon_3;exon_1;exon_1;exon_1;TSS1500;TSS1500	MALINC1;MALINC1;MALINC1;MALINC1;MALINC1;MALINC1;MALINC1;MALINC1;MALINC1;MALINC1;MALINC1;MALINC1;MALINC1;ENSG00000185129.8;ENSG00000185129.8	ENST00000663778.1;ENST00000660071.1;ENST00000654348.1;ENST00000656599.1;ENST00000522747.6;ENST00000653092.1;ENST00000521563.6;ENST00000499203.7;ENST00000659960.1;ENST00000659306.1;ENST00000520928.1;ENST00000518790.2;ENST00000668151.1;ENST00000505703.2;ENST00000651386.1					FALSE		EH38D3767168	EH38E2413999|CTCF-only/CTCF-bound;EH38E2413999|DNase-only;EH38E2413999|Low-DNase;EH38E2413999|pELS/CTCF-bound	1;1;84;1	Quies;TssFlnk;ReprPC;ReprPCWk;EnhA1;EnhA2;EnhWk;EnhBiv;TssFlnkD;TxWk;Het;TssA	837;78;328;273;8;43;51;34;1;5;4;1	cg00450651
cg00453774	cg00453774	-0.020309	0.00463468	-4.38196	1.17616e-05	0.0415541	cg00453774_TC21	92789218	TCATCAACAACAACTACCTTAAAACCAATTAAAACTATAATCCTAATCTC						cg	R	T	C	2	II	14	64295104	Human	GRCh38	CGAGACTAGGACCACAGTCTTAACTGGCTTTAAGGCAGCTGTTGCTGATG	CCAGTTCCCCCAGCTTAATGGGGTGTTCCCCTCACCCACCCCAGCAGGAGCCCCAGGGTG[CG]AGACTAGGACCACAGTCTTAACTGGCTTTAAGGCAGCTGTTGCTGATGAAAATGAAAAGG	CCTTTTCATTTTCATCAGCAACAGCTGCCTTAAAGCCAGTTAAGACTGTGGTCCTAGTCT[CG]CACCCTGGGGCTCCTGCTGGGGTGGGTGAGGGGAACACCCCATTAAGCTGGGGGAACTGG	1	TSS1500;TSS1500	ESR2;ESR2	NM_001437.3;NM_001040275.1	chr14:64294013-64294523	S_Shore	TSS1500;TSS1500;TSS1500	ENSG00000140009.19;ENSG00000140009.19;ENSG00000140009.19	ENST00000556275.5;ENST00000353772.7;ENST00000341099.6			14:64761370-64761909	Unclassified	TRUE		EH38D4821228	EH38E3099504|CTCF-only/CTCF-bound;EH38E3099504|DNase-H3K4me3;EH38E3099504|DNase-H3K4me3/CTCF-bound;EH38E3099504|Low-DNase;EH38E3099504|pELS/CTCF-bound	7;1;51;23;5	Quies;ReprPC;TssFlnkD;TssBiv;EnhBiv;TssFlnk;TssFlnkU;TxWk;EnhWk;ReprPCWk;EnhA2;TssA	974;242;41;111;140;22;12;15;68;32;5;1
cg00455327	cg00455327	-0.0567016	0.0128852	-4.40051	1.07998e-05	0.0394616	cg00455327_TC21	89710988	ATTACCCATTAACTCCAAAACTAAATTTAAACCTTTAATTAAATTAATCC						cg	R	T	C	2	II	18	23134253	Human	GRCh38	CGTTGATCTGAAACACATTGCTTCTCCCTCAAAAGTGCAGCAGGTTTCTT	TTCAATGTAGAGTTACCCATTAGCTCCAGGGCTAAATTTAAACCTTTAATTAAATTAATC[CG]TTGATCTGAAACACATTGCTTCTCCCTCAAAAGTGCAGCAGGTTTCTTAGGTGTCACAGA	TCTGTGACACCTAAGAAACCTGCTGCACTTTTGAGGGAGAAGCAATGTGTTTCAGATCAA[CG]GATTAATTTAATTAAAGGTTTAAATTTAGCCCTGGAGCTAATGGGTAACTCTACATTGAA	1	TSS1500;TSS1500;TSS1500	CABLES1;CABLES1;CABLES1	NM_001100619.3;NM_001256438.1;NR_023359.2	chr18:23135004-23137107	N_Shore	TSS1500;TSS1500;TSS1500;TSS1500	ENSG00000134508.13;ENSG00000134508.13;ENSG00000134508.13;ENSG00000134508.13	ENST00000400473.6;ENST00000579963.5;ENST00000580153.5;ENST00000256925.12					FALSE					Quies;EnhBiv;TssBiv;ReprPC;EnhA2;TssFlnkU;EnhA1;EnhWk;TssFlnk;TxWk;ReprPCWk;Het;TssA;TssFlnkD	867;225;101;38;67;89;90;93;8;21;28;5;27;4	cg00455327
cg00455386	cg00455386	-0.0542554	0.0111704	-4.85705	1.19147e-06	0.0100041	cg00455386_BC21	60718956	AAAACCCCCTTTCATTAAACCTACAAACCTTACTAAAAAACACAAACAAC						cg	R	B	C	2	II	7	140404286	Human	GRCh38	AAGCCCCCTTTCATTGAGCCTACAAGCCTTGCTGGGAGGCACAGGCAGCG	CAGGTGAACCAGGAAGGCGAAGGCTGCGGGATGCCGGCGGGAGGACATCATCGGGGTGGA[CG]CTGCCTGTGCCTCCCAGCAAGGCTTGTAGGCTCAATGAAAGGGGGCTTTAGTGGAAACCC	CAGGTGAACCAGGAAGGCGAAGGCTGCGGGATGCCGGCGGGAGGACATCATCGGGGTGGA[CG]CTGCCTGTGCCTCCCAGCAAGGCTTGTAGGCTCAATGAAAGGGGGCTTTAGTGGAAACCC	1						exon_1;exon_1;5UTR	SLC37A3;SLC37A3;SLC37A3	ENST00000491505.1;ENST00000493423.1;ENST00000491505.1			7:140103543-140104423	Promoter_Associated	TRUE		EH38D5902916	EH38E3804382|DNase-only;EH38E3804382|Low-DNase;EH38E3804382|pELS	1;83;3	Tx;TssBiv;TxWk;TssFlnk;TssA;TssFlnkU;EnhBiv;Quies;ReprPCWk;TssFlnkD;EnhA1;ReprPC;EnhWk;EnhG1	442;351;349;82;110;134;30;69;15;33;4;31;9;4	cg00455386
cg00468163	cg00468163	-0.0153851	0.00275978	-5.57477	2.47856e-08	0.00101784	cg00468163_BC21	37761117	TACAATAACTTCCTAAAACTACTATAACAAACTACTACAAACTAAATCAC						cg	F	B	C	2	II	6	33436832	Human	GRCh38	ACAGTAGCTTCCTGGGGCTGCTATAACAAACTGCTACAAACTGGGTCACG	GTCTACGCTTCTACAGTAGCTTCCTGGGGCTGCTATAACAAACTGCTACAAACTGGGTCA[CG]TAAAACAACAGAAATTTATTCTCTCACAGTTCAGGAGGCTGGAAGTCCAAAAGCAAGGTA	TACCTTGCTTTTGGACTTCCAGCCTCCTGAACTGTGAGAGAATAAATTTCTGTTGTTTTA[CG]TGACCCAGTTTGTAGCAGTTTGTTATAGCAGCCCCAGGAAGCTACTGTAGAAGCGTAGAC	1	TSS1500	MIR5004	NR_049800.1_2			TSS1500	ENSG00000284256.1	ENST00000579078.1					FALSE		EH38D5745461			Quies;Tx;TxWk;ReprPCWk;EnhG1;Het	803;724;78;50;3;5
cg00488501	cg00488501	-0.0254447	0.00557075	-4.56756	4.9343e-06	0.0245193	cg00488501_TC21	98716829	CCCTACCCCTTATATACTAAAAAAAACCCTCAATCACACTCTAACTATAC						cg	F	T	C	2	II	11	3165802	Human	GRCh38	CGTACAGTTAGAGTGTGACTGAGGGTCCTTCTTAGCACATAAGGGGCAGG	GAGCCCGTTGTCCCTGCCCCTTATGTGCTAAGAAGGACCCTCAGTCACACTCTAACTGTA[CG]TCTTTCTCAGGACCCTTTTGACAAGAACCTCCCCTCATGTGCATTTCTTCCTGTGTTTTC	GAGCCCGTTGTCCCTGCCCCTTATGTGCTAAGAAGGACCCTCAGTCACACTCTAACTGTA[CG]TCTTTCTCAGGACCCTTTTGACAAGAACCTCCCCTCATGTGCATTTCTTCCTGTGTTTTC	1	TSS1500;TSS1500;TSS1500	OSBPL5;OSBPL5;OSBPL5	NM_020896.4;NM_001144063.2;NM_145638.3	chr11:3164901-3165538	S_Shore	TSS1500;TSS1500;TSS1500;TSS1500;TSS1500;TSS1500;TSS200;TSS1500;TSS1500	ENSG00000021762.20;ENSG00000021762.20;ENSG00000021762.20;ENSG00000021762.20;ENSG00000021762.20;ENSG00000021762.20;ENSG00000021762.20;ENSG00000021762.20;ENSG00000021762.20	ENST00000263650.12;ENST00000389989.7;ENST00000471998.6;ENST00000348039.9;ENST00000533234.5;ENST00000465323.1;ENST00000530372.5;ENST00000533721.5;ENST00000528124.1					FALSE		EH38D2416224	EH38E1516116|Low-DNase;EH38E1516116|pELS	85;2	Quies;EnhWk;EnhBiv;TssFlnkD;Tx;TssBiv;EnhA1;TxWk;TssA;TssFlnkU;ReprPC;TssFlnk;ReprPCWk;EnhA2;Het;EnhG1	588;173;176;172;18;116;3;214;2;31;48;51;46;18;1;6	cg00488501
cg00509331	cg00509331	-0.0820509	0.0129084	-6.35642	2.06513e-10	5.6614e-05	cg00509331_TC21	52804536	TAACAAACATTCCTTAACTTTAATCCAATCAAAACCAAATTAAAATAAAC						cg	F	T	C	2	II	12	47223383	Human	GRCh38	CGTTTACTTTAATTTGGCTCTGACTGGATCAAAGCCAAGGAATGTTTGTT	CGGTGATTTACTAACAAACATTCCTTGGCTTTGATCCAGTCAGAGCCAAATTAAAGTAAA[CG]GAGGAGTGAGTGGGAGGTGGGGCCCAGACCCAGACCCAGTCAGTGCAAGCAAGTTTTTTT	CGGTGATTTACTAACAAACATTCCTTGGCTTTGATCCAGTCAGAGCCAAATTAAAGTAAA[CG]GAGGAGTGAGTGGGAGGTGGGGCCCAGACCCAGACCCAGTCAGTGCAAGCAAGTTTTTTT	1						TSS200;TSS200	ENSG00000179715.13;ENSG00000179715.13	ENST00000549630.1;ENST00000551777.1					FALSE		EH38D4688589	EH38E3014037|dELS;EH38E3014037|dELS/CTCF-bound;EH38E3014037|Low-DNase	7;1;79	ReprPC;ReprPCWk;Quies;TssFlnkU;TxWk;TssFlnk;EnhA1;EnhWk;EnhA2;TssA;EnhG2;TssFlnkD;EnhBiv	520;242;170;158;40;3;255;205;48;10;5;6;1
cg00513208	cg00513208	-0.0772515	0.0173266	-4.45855	8.25152e-06	0.0335327	cg00513208_TC21	65649294	AAACATCRAAAATCCTACRAAAAAATTTCCAAAAACACTTCTAAATATTC						cg	F	T	C	2	II	10	12043642	Human	GRCh38	CGAACACCTAGAAGTGCTTCTGGAAATCCCCCCGCAGGACTTTCGATGTC	AATGCCCTAAAAGACATCGAAAGTCCTGCGGGGGGATTTCCAGAAGCACTTCTAGGTGTT[CG]ACGTAAAAACCACCCAGGGCGAAGAAGAATCAAGGCTTTTTCCATACACTTCTTAGAAAG	AATGCCCTAAAAGACATCGAAAGTCCTGCGGGGGGATTTCCAGAAGCACTTCTAGGTGTT[CG]ACGTAAAAACCACCCAGGGCGAAGAAGAATCAAGGCTTTTTCCATACACTTCTTAGAAAG	1	TSS1500;TSS1500	UPF2;UPF2	NM_015542.4;NM_080599.3	chr10:12042237-12043432	S_Shore	TSS1500;TSS1500;TSS1500	ENSG00000151461.20;ENSG00000151461.20;ENSG00000151461.20	ENST00000357604.10;ENST00000397053.6;ENST00000460569.1			10:12084071-12085781	Promoter_Associated	TRUE		EH38D2314902	EH38E1448536|Low-DNase;EH38E1448536|pELS	43;44	TxWk;TssA;Tx;TssFlnkU;TssFlnk;EnhA2;Quies;EnhA1;TssFlnkD	625;166;182;610;28;20;24;4;4	cg00513208
cg00514535	cg00514535	-0.0828441	0.0154273	-5.36997	7.87483e-08	0.0020124	cg00514535_BC21	65653398	CAATTCCTCAACRTACTAAAAACAAAAATACTATTTAATTCAACAATCCC						cg	F	B	C	2	II	17	9566445	Human	GRCh38	AATTCCTCAACGTACTAAAAACAGAAATACTATTTGATTCAGCAATCCCG	AGACGGTGTGGCAATTCCTCAACGTACTAAAAACAGAAATACTATTTGATTCAGCAATCC[CG]TTATTGGGTATATCCCCGAAGGAATAGAAATCATTCTTCCATAAAGACACATGCATGTGG	CCACATGCATGTGTCTTTATGGAAGAATGATTTCTATTCCTTCGGGGATATACCCAATAA[CG]GGATTGCTGAATCAAATAGTATTTCTGTTTTTAGTACGTTGAGGAATTGCCACACCGTCT	1													FALSE					Quies;ReprPCWk;EnhWk;TssFlnk;TxWk;EnhG1;Het;EnhA1;Tx;EnhA2;TssFlnkD;TssFlnkU;TssA	1013;42;17;20;464;2;51;2;8;24;16;2;2
cg00517855	cg00517855	-0.0300383	0.00667108	-4.50277	6.70733e-06	0.0297224	cg00517855_TC21	63720106	AAAAAAACTATTAACCAACTACATACAAATACAACAATCAAAAAACCCAC						cg	F	T	C	2	II	8	144791023	Human	GRCh38	CGTGGGCTTCCTGATTGCTGCACTTGCATGCAGTTGGTTAACAGCCTTTT	CTGCCTTCTCTAAAAAGGCTGTTAACCAACTGCATGCAAGTGCAGCAATCAGGAAGCCCA[CG]GTAGAATCCAAGACCCTGGTGACTTCGTCCCAATCTCATTTAACGCCTCAACAGCAGTAA	CTGCCTTCTCTAAAAAGGCTGTTAACCAACTGCATGCAAGTGCAGCAATCAGGAAGCCCA[CG]GTAGAATCCAAGACCCTGGTGACTTCGTCCCAATCTCATTTAACGCCTCAACAGCAGTAA	1				chr8:144786805-144787528;chr8:144791542-144793279	S_Shelf;N_Shore	TSS200	ENSG00000161016.18	ENST00000534781.1					FALSE					ReprPC;Het;EnhG2;ZNF/Rpts;TssFlnkD;EnhG1;TssFlnkU;TssA;ReprPCWk;EnhA2;EnhA1;Quies;Tx;EnhBiv;EnhWk;TxWk;TssBiv;TssFlnk	472;34;716;224;27;32;15;20;51;8;2;31;2;6;8;8;1;6	cg00517855
cg00521239	cg00521239	-0.0559211	0.0115823	-4.82814	1.37816e-06	0.0109898	cg00521239_BC21	48640259	AATATCAAACAAATATACAAAAACACCTAAACTAAAAATATTCTAAATAC						cg	R	B	C	2	II	8	143941796	Human	GRCh38	GTGTCAGGCAGGTGTGCAGAGGCACCTGAGCTGGGGGTGTTCTGGGTGCG	ACCCAGCCAGGCTACACCCACCCTCTACAGCTGCAGCTCAGCTGGCTCTCCCACCTGGGA[CG]CACCCAGAACACCCCCAGCTCAGGTGCCTCTGCACACCTGCCTGACACCTGTGCTGTCCA	ACCCAGCCAGGCTACACCCACCCTCTACAGCTGCAGCTCAGCTGGCTCTCCCACCTGGGA[CG]CACCCAGAACACCCCCAGCTCAGGTGCCTCTGCACACCTGCCTGACACCTGTGCTGTCCA	1				chr8:143942249-143942748;chr8:143943700-143944276;chr8:143944647-143945046	N_Shore;N_Shore;N_Shelf				chr8:143941600-143941803				FALSE		EH38D6005114	EH38E3869418|DNase-H3K4me3;EH38E3869418|Low-DNase;EH38E3869418|pELS	2;49;36	Quies;TssFlnkU;TssA;ReprPCWk;EnhA1;EnhWk;EnhA2;TssFlnk;ReprPC;TxWk;TssFlnkD;ZNF/Rpts;EnhBiv;EnhG2;Het	379;639;43;434;74;25;20;10;16;5;12;1;1;3;1	cg00521239
cg00527659	cg00527659	-0.0303503	0.00681898	-4.45085	8.55309e-06	0.03421	cg00527659_BC21	72675557	TTAAACCTAAACTTTATACTTTTCCTCCTAACTACTATCTATCCTTCCCC						cg	F	B	C	2	II	14	22976852	Human	GRCh38	TAAACCTGGACTTTGTGCTTTTCCTCCTAACTGCTGTCTGTCCTTCCCCG	GCATAATATATTTAAACCTGGACTTTGTGCTTTTCCTCCTAACTGCTGTCTGTCCTTCCC[CG]CACAAAAATTCCATCTGATGCAATTCCAATTTGCTTTGGCTTCATTCCAGCCAACTTCCC	GGGAAGTTGGCTGGAATGAAGCCAAAGCAAATTGGAATTGCATCAGATGGAATTTTTGTG[CG]GGGAAGGACAGACAGCAGTTAGGAGGAAAAGCACAAAGTCCAGGTTTAAATATATTATGC	1	TSS200	AJUBA	NM_198086.3	chr14:22980677-22982965	N_Shelf	exon_1;5UTR;TSS200;TSS200	AJUBA;AJUBA;ENSG00000129474.16;ENSG00000129474.16	ENST00000397388.7;ENST00000397388.7;ENST00000553592.5;ENST00000553911.1					FALSE		EH38D4801552	EH38E3086590|Low-DNase;EH38E3086590|pELS	61;26	EnhA2;ReprPCWk;EnhA1;TssFlnkU;Quies;TxWk;TssA;EnhG2;EnhWk;EnhG1;Tx;ReprPC;EnhBiv;TssFlnk;TssFlnkD	106;123;408;95;433;231;15;101;105;8;3;5;1;26;3
cg00533183	cg00533183	-0.0498766	0.0114828	-4.34357	1.40186e-05	0.0459581	cg00533183_TC21	50733881	CACRCTCRCCTTCAAATTCCAACATAAAATAATTACAACAATAAATTCTC						cg	R	T	C	2	II	6	32842965	Human	GRCh38	CGAGAATCCACTGCTGCAATCACTCCATGCTGGAACTTGAAGGCGAGCGT	CTCCCCAGATTCTGCCTGCTGGAGCGTATACACTCACTAATGTAGGACCCAGCTGAGGCC[CG]AGAATCCACTGCTGCAATCACTCCATGCTGGAACTTGAAGGCGAGCGTGGTGGTGCCATG	CATGGCACCACCACGCTCGCCTTCAAGTTCCAGCATGGAGTGATTGCAGCAGTGGATTCT[CG]GGCCTCAGCTGGGTCCTACATTAGTGAGTGTATACGCTCCAGCAGGCAGAATCTGGGGAG	1	exon_2;exon_2;TSS1500;TSS1500;TSS1500;TSS1500	PSMB8;PSMB8;PSMB8-AS1;PSMB8-AS1;PSMB8-AS1;PSMB8-AS1	NM_004159.5_8;NM_148919.4_8;NR_037176.1_8;NR_037174.1_8;NR_037175.1_8;NR_037173.1_8	chr6:32843717-32844062	N_Shore	exon_2;exon_2;exon_2;exon_2;exon_1;exon_1;exon_2;TSS1500;TSS1500;TSS1500;TSS1500;TSS1500;TSS1500;TSS1500;TSS1500	PSMB8;PSMB8;PSMB8;PSMB8;PSMB8;PSMB8;PSMB8;ENSG00000204261.9;ENSG00000204261.9;ENSG00000204261.9;ENSG00000204261.9;ENSG00000204261.9;ENSG00000204261.9;ENSG00000204261.9;ENSG00000240065.8	ENST00000395339.7;ENST00000374882.8;ENST00000374881.3;ENST00000650793.2;ENST00000650411.1;ENST00000697612.1;ENST00000484003.1;ENST00000429600.2;ENST00000453426.2;ENST00000415067.2;ENST00000458296.2;ENST00000666376.1;ENST00000413039.6;ENST00000412095.1;ENST00000395330.5					FALSE		EH38D3832571	EH38E2460169|Low-DNase;EH38E2460169|pELS	86;1	ReprPCWk;ReprPC;TssFlnkU;TssBiv;TssA;TssFlnkD;EnhG1;EnhG2;TxWk;EnhWk;Quies;EnhA2;TssFlnk;EnhBiv;EnhA1;Tx	544;186;64;110;15;80;15;59;123;66;301;15;27;45;11;2	cg00533183
cg00537196	cg00537196	-0.0944607	0.0171923	-5.49435	3.92154e-08	0.00135069	cg00537196_TC21	82709281	AAACTACATTATATCAAATTAACAAACCTAAATTTCCTACCATTAACAAC						cg	F	T	C	2	II	14	52221553	Human	GRCh38	CGTTGCTAATGGTAGGAAACTTAGGCTTGCTAATTTGATACAATGCAGTC	TAAACCTAAAGGGACTGCATTGTATCAAATTAGCAAGCCTAAGTTTCCTACCATTAGCAA[CG]CCTAAATGGAGTCCAGTTATAATGCTATAATGAGCCCTCGATCTTTGTGCACGGGTAAAC	TAAACCTAAAGGGACTGCATTGTATCAAATTAGCAAGCCTAAGTTTCCTACCATTAGCAA[CG]CCTAAATGGAGTCCAGTTATAATGCTATAATGAGCCCTCGATCTTTGTGCACGGGTAAAC	1											14:52688119-52688480	Unclassified_Cell_type_specific	TRUE		EH38D4814847	EH38E3094908|DNase-H3K4me3;EH38E3094908|Low-DNase	1;86	Quies;TssA;TssFlnk;ReprPCWk;EnhA1;EnhA2;TssFlnkD;TssFlnkU;TxWk;Het;EnhWk	1376;19;190;34;2;2;15;19;2;1;3
cg00540558	cg00540558	-0.0200982	0.00462348	-4.34698	1.38023e-05	0.0456623	cg00540558_BC21	89725317	CAAACTCCCTACTTCTACATATATAACTTTCTATAACCTAACTTATACCC						cg	R	B	C	2	II	19	40424828	Human	GRCh38	AAACTCCCTACTTCTGCATATGTGGCTTTCTGTGACCTGGCTTGTGCCCG	CATGGGTGGCACACAGAGAGTGACATGGTAGGAGACCAGATTGGGGAGCAGCTAGGGGAA[CG]GGCACAAGCCAGGTCACAGAAAGCCACATATGCAGAAGTAGGGAGTTTGGATTTTATCCT	CATGGGTGGCACACAGAGAGTGACATGGTAGGAGACCAGATTGGGGAGCAGCTAGGGGAA[CG]GGCACAAGCCAGGTCACAGAAAGCCACATATGCAGAAGTAGGGAGTTTGGATTTTATCCT	1				chr19:40420733-40421461;chr19:40425354-40426206	S_Shelf;N_Shore	TSS1500	ENSG00000277453.1	ENST00000614440.1	chr19:40424357-40424910		19:40930613-40932386	Promoter_Associated	TRUE		EH38D5134310	EH38E3306072|DNase-H3K4me3;EH38E3306072|Low-DNase;EH38E3306072|pELS;EH38E3306072|pELS/CTCF-bound	1;78;6;2	Quies;ReprPC;TssFlnkU;TssA;ReprPCWk;TxWk;EnhA2;TssFlnk;Het;Tx;TssFlnkD;EnhA1;EnhWk;EnhG1;EnhG2	553;21;635;174;191;42;10;9;12;3;8;2;1;1;1	cg00540558
cg00541683	cg00541683	-0.0278449	0.00610771	-4.55897	5.14051e-06	0.0250681	cg00541683_BC21	87794552	AAAACRACAAACACACRATTATCCTAACTAAATCTCCTATAACRAAAACC						cg	R	B	C	2	II	1	31576332	Human	GRCh38	AAACGACAAGCACACGATTGTCCTGGCTGGGTCTCCTGTGGCGGAAGCCG	TGTGAAGTCCTTCCCAGTGTGAAACCGCAATCCTTCCTGCTTGGGGTTCCCCTAAGGGAA[CG]GCTTCCGCCACAGGAGACCCAGCCAGGACAATCGTGTGCTTGTCGTTTCTCCACCCTGCA	TGTGAAGTCCTTCCCAGTGTGAAACCGCAATCCTTCCTGCTTGGGGTTCCCCTAAGGGAA[CG]GCTTCCGCCACAGGAGACCCAGCCAGGACAATCGTGTGCTTGTCGTTTCTCCACCCTGCA	1	TSS200;TSS200	TINAGL1;TINAGL1	NM_001204414.2;NM_022164.3			TSS1500;TSS200;TSS200;TSS1500;TSS1500;TSS1500;TSS1500	ENSG00000229167.2;ENSG00000142910.16;ENSG00000142910.16;ENSG00000142910.16;ENSG00000142910.16;ENSG00000142910.16;ENSG00000142910.16	ENST00000435872.1;ENST00000457433.6;ENST00000271064.12;ENST00000461030.5;ENST00000466998.1;ENST00000478398.5;ENST00000481165.5					FALSE		EH38D4364412	EH38E2800361|DNase-only;EH38E2800361|Low-DNase;EH38E2800361|pELS;EH38E2800361|PLS;EH38E2800361|PLS/CTCF-bound	3;41;1;39;3	Quies;TssFlnkU;EnhBiv;ReprPCWk;TssA;EnhA2;EnhA1;EnhWk;TssFlnk;ReprPC;TssBiv;TxWk;TssFlnkD	727;372;107;26;46;59;87;100;16;21;40;39;23	cg00541683
cg00543315	cg00543315	-0.0690517	0.0142054	-4.86096	1.16816e-06	0.00995814	cg00543315_BC21	63641839	ACAAATTAAAACTAAAACCCAAACTCCAAAAATACTTAAAAATTACACCC						cg	F	B	C	2	II	11	121763051	Human	GRCh38	CAAGTTGGGGCTGGGGCCCAGACTCCAGGGATGCTTGAGGGTTGCACCCG	GTGGAACCTGGACAAGTTGGGGCTGGGGCCCAGACTCCAGGGATGCTTGAGGGTTGCACC[CG]TCAGAATCCCTGGCGCCAGGCCAGGCCAGGGCGGCCTGCTCCGTGAAGGAAATATTGAAC	GTTCAATATTTCCTTCACGGAGCAGGCCGCCCTGGCCTGGCCTGGCGCCAGGGATTCTGA[CG]GGTGCAACCCTCAAGCATCCCTGGAGTCTGGGCCCCAGCCCCAACTTGTCCAGGTTCCAC	1													FALSE		EH38D4652662	EH38E2990321|CTCF-only/CTCF-bound;EH38E2990321|dELS/CTCF-bound;EH38E2990321|DNase-only;EH38E2990321|Low-DNase	4;1;7;75	Quies;Het;EnhWk;EnhA2;EnhA1;TxWk;TssFlnkU;ReprPCWk;TssFlnkD;ReprPC;EnhBiv;TssFlnk;TssBiv	910;2;293;20;268;21;5;66;30;25;16;6;1
cg00546666	cg00546666	-0.0304443	0.0060976	-4.99284	5.94986e-07	0.00681975	cg00546666_TC21	84809449	CCTAAACCACAACCAAAAAAAACTATTTTCTTTAAACTTTTACATAAATC						cg	F	T	C	2	II	20	45969982	Human	GRCh38	CGATTTATGCAAAAGCCCAAAGAAAATAGCTCCCCCTGGCTGTGGCTTAG	GAGAAGGGACTCCTAAGCCACAGCCAGGGGGAGCTATTTTCTTTGGGCTTTTGCATAAAT[CG]TTCCCTCTGCCTGAAACTCTTCCCAGCATCACCCTATGGCTAAATCTTACCCAGCCTTCT	GAGAAGGGACTCCTAAGCCACAGCCAGGGGGAGCTATTTTCTTTGGGCTTTTGCATAAAT[CG]TTCCCTCTGCCTGAAACTCTTCCCAGCATCACCCTATGGCTAAATCTTACCCAGCCTTCT	1				chr20:45971166-45972568	N_Shore	exon_1;TSS1500	ZNF335;ENSG00000198026.8	ENST00000476822.1;ENST00000494955.1			20:44598023-44599397	Promoter_Associated	TRUE		EH38D5333956	EH38E3435254|CTCF-only/CTCF-bound;EH38E3435254|dELS/CTCF-bound;EH38E3435254|DNase-H3K4me3/CTCF-bound;EH38E3435254|Low-DNase	14;23;7;43	TxWk;EnhG2;EnhWk;EnhA2;TssFlnkD;EnhA1;Tx;TssFlnkU;TssFlnk;EnhG1;Quies;TssA	602;18;285;127;101;136;47;243;14;56;27;7	cg00546666
cg00553487	cg00553487	-0.0354292	0.00761298	-4.65378	3.25898e-06	0.0191301	cg00553487_TC11	14604256	CTAAACAAACAACCATTACTAAACAACAAAAACCAACTAAAAAAAATACA	75687428	CTAAACAAACAACCGTTACTAAACAACAAAAACCGACTAAAAAAAATACG	A	Red	R	cg	F	T	C	1	I	19	42066254	Human	GRCh38	CGCATCCTCTCCAGCCGGTTTCTGTTGCCTAGTAACGGCTGCCTGCCCAG	CCGCCCCTGTCTCTGGGCAGGCAGCCGTTACTAGGCAACAGAAACCGGCTGGAGAGGATG[CG]GTGGTTGCTAGGCAACCCCATCCCAGGCCTCACTTGCCACTTTCCTAACATCCCCAGTTC	CCGCCCCTGTCTCTGGGCAGGCAGCCGTTACTAGGCAACAGAAACCGGCTGGAGAGGATG[CG]GTGGTTGCTAGGCAACCCCATCCCAGGCCTCACTTGCCACTTTCCTAACATCCCCAGTTC	1						TSS1500;TSS1500;TSS1500	ENSG00000105737.10;ENSG00000105737.10;ENSG00000105737.10	ENST00000262895.7;ENST00000301218.8;ENST00000594528.1					FALSE		EH38D5136254	EH38E3307353|DNase-H3K4me3;EH38E3307353|DNase-only;EH38E3307353|Low-DNase	1;13;73	EnhBiv;ReprPCWk;TxWk;EnhWk;Quies;ReprPC;EnhA2;EnhA1;EnhG2;TssFlnk;TssFlnkU;TssFlnkD;EnhG1;Het	5;783;117;65;257;347;32;42;4;1;3;3;3;1	cg00553487
cg00556407	cg00556407	-0.0370967	0.00563761	-6.58022	4.69745e-11	2.64709e-05	cg00556407_BC21	28768549	ACTAAACTACCCAAACAAAAAACAACATCCAAATCAAAACATCACTATCC						cg	F	B	C	2	II	8	94357211	Human	GRCh38	CTAAGCTACCCAGACAGAAAGCAACATCCAGGTCAAAGCATCACTGTCCG	AAGCCTCCAGTACTAAGCTACCCAGACAGAAAGCAACATCCAGGTCAAAGCATCACTGTC[CG]ACCACATGACCCTTCTACACCTGGGCCCCGAAGGCACTGCTAGGAGTCAACAGCTCCACC	GGTGGAGCTGTTGACTCCTAGCAGTGCCTTCGGGGCCCAGGTGTAGAAGGGTCATGTGGT[CG]GACAGTGATGCTTTGACCTGGATGTTGCTTTCTGTCTGGGTAGCTTAGTACTGGAGGCTT	1											8:95368879-95370234	Unclassified	TRUE		EH38D5969227	EH38E3845492|CTCF-only/CTCF-bound;EH38E3845492|dELS/CTCF-bound;EH38E3845492|DNase-only;EH38E3845492|Low-DNase	44;1;2;40	Quies;ReprPCWk;EnhA1;ReprPC;EnhA2;TxWk;EnhWk;Het	1462;62;15;6;16;53;48;1	cg00556407
cg00559249	cg00559249	-0.0372551	0.00718576	-5.18458	2.16504e-07	0.00376037	cg00559249_BC21	30734561	CCAATATATCTCCAAAACCAAACCTAAAATTCACCAAAAAACAAACCTAC						cg	R	B	C	2	II	5	132495552	Human	GRCh38	CAGTGTATCTCCAGAACCAAACCTGGGGTTCACCAAAAAGCAGGCCTGCG	TGCAAGGAGCCTAACTGGAGAGAAAGAAAGTCCCTTAATTCATTCAACACATATGAATCA[CG]CAGGCCTGCTTTTTGGTGAACCCCAGGTTTGGTTCTGGAGATACACTGGGGCACCAGACC	TGCAAGGAGCCTAACTGGAGAGAAAGAAAGTCCCTTAATTCATTCAACACATATGAATCA[CG]CAGGCCTGCTTTTTGGTGAACCCCAGGTTTGGTTCTGGAGATACACTGGGGCACCAGACC	1				chr5:132496663-132497202	N_Shore						5:131831217-131833093	Promoter_Associated	TRUE		EH38D5684905	EH38E3660674|dELS;EH38E3660674|dELS/CTCF-bound;EH38E3660674|Low-DNase	45;1;41	Quies;ReprPCWk;TssFlnkU;TssA;EnhA1;EnhA2;TssBiv;TssFlnk;EnhBiv;Het;TssFlnkD;ReprPC;EnhWk;TxWk	795;34;687;39;44;13;24;9;2;1;10;1;2;2	cg00559249
cg00568555	cg00568555	-0.0407246	0.00908815	-4.48106	7.42728e-06	0.0316158	cg00568555_TC21	40786910	CAAAAAATCACRAAAAAATCCTCCTCCTAAAACAACACCTCCAAATTCCC						cg	F	T	C	2	II	19	35029942	Human	GRCh38	CGGGAATCTGGAGGTGCTGTTTCAGGAGGAGGACCCCTTCGTGATCCCCT	ATAAATGGGTGCAGGGGATCACGAAGGGGTCCTCCTCCTGAAACAGCACCTCCAGATTCC[CG]GGGCTGCTTCTCTCCAGGGTGCCCCGCCTGCTTGGGTGAGGTCCGGATTGTAGCTGTAGT	ATAAATGGGTGCAGGGGATCACGAAGGGGTCCTCCTCCTGAAACAGCACCTCCAGATTCC[CG]GGGCTGCTTCTCTCCAGGGTGCCCCGCCTGCTTGGGTGAGGTCCGGATTGTAGCTGTAGT	1	TSS1500;TSS1500;TSS1500	SCN1B;SCN1B;SCN1B	NM_001321605.2;NM_199037.5;NM_001037.5	chr19:35030258-35031303;chr19:35032540-35032749	N_Shore;N_Shelf	TSS1500;TSS1500;TSS1500;TSS1500;TSS1500;TSS1500	ENSG00000105711.14;ENSG00000105711.14;ENSG00000105711.14;ENSG00000105711.14;ENSG00000105711.14;ENSG00000105711.14	ENST00000638536.1;ENST00000595652.5;ENST00000640135.1;ENST00000596348.2;ENST00000415950.5;ENST00000262631.11					FALSE					ReprPCWk;Quies;TssBiv;TssFlnkD;TssFlnkU;EnhWk;ZNF/Rpts;EnhA1;TssFlnk;Het;EnhBiv;TxWk;EnhA2;TssA;ReprPC	97;635;379;133;151;44;27;7;20;76;69;6;5;7;7	cg00568555
cg00571819	cg00571819	-0.025521	0.00580588	-4.39572	1.10407e-05	0.0399595	cg00571819_TC21	80739455	AACCTACCAAAAATACTTACTAACTTCTAACATAATACTTAAAACAAAAC						cg	F	T	C	2	II	9	130580499	Human	GRCh38	CGTTCTGTTCTAAGTACCATGCCAGAAGCCAGTAAGTATTTTTGGCAGGT	AGTGAATATGGGACCTGCCAAAAATACTTACTGGCTTCTGGCATGGTACTTAGAACAGAA[CG]TGTTCTTCATTTGTATCTAAAACTTACTTACAAGTCAGCCCTAACACTTCAGCTTCCTCG	AGTGAATATGGGACCTGCCAAAAATACTTACTGGCTTCTGGCATGGTACTTAGAACAGAA[CG]TGTTCTTCATTTGTATCTAAAACTTACTTACAAGTCAGCCCTAACACTTCAGCTTCCTCG	1	TSS1500	LOC100272217	NR_027440.1	chr9:130579242-130580109	S_Shore	TSS1500	ENSG00000107164.17	ENST00000465949.1					FALSE					EnhA1;TxWk;TssFlnkD;TssFlnk;Tx;TssFlnkU;EnhA2;Quies;EnhG2;EnhG1;EnhWk;TssA;ReprPCWk	21;329;575;92;302;102;37;60;23;71;43;7;1	cg00571819
cg00579605	cg00579605	-0.0721312	0.01576	-4.57686	4.71996e-06	0.0238189	cg00579605_BC21	9691542	AAAAACCAATACCCATCTCTTTATCTCTTTCTCTCTAATTTTCATTCCTC						cg	F	B	C	2	II	20	56734338	Human	GRCh38	AGAACCAGTGCCCATCTCTTTATCTCTTTCTCTCTGGTTTTCATTCCTCG	GCGAAGAGCCAGAGAACCAGTGCCCATCTCTTTATCTCTTTCTCTCTGGTTTTCATTCCT[CG]TCTATTTTCATTCCACCAAATAGGTTTGGTTTTTAAGCTTTTCCTCAGGAAAATGAAATA	TATTTCATTTTCCTGAGGAAAAGCTTAAAAACCAAACCTATTTGGTGGAATGAAAATAGA[CG]AGGAATGAAAACCAGAGAGAAAGAGATAAAGAGATGGGCACTGGTTCTCTGGCTCTTCGC	1													FALSE					Quies;ReprPC;ReprPCWk;EnhWk;TxWk;EnhBiv;EnhA2;TssFlnk;Het	788;51;781;13;19;3;3;1;4
cg00580652	cg00580652	-0.0401958	0.00827242	-4.85901	1.17976e-06	0.009979	cg00580652_BC21	65718477	AAAAACCTAAAAACTCRATACRAAAAAACTACTCCCTTTACRAAAAAACC						cg	F	B	C	2	II	1	2019917	Human	GRCh38	AAGACCTGAGAACTCGGTGCGGGGAGGCTGCTCCCTTTGCGGGGGAGCCG	TTGAGGAGAGGAAAGACCTGAGAACTCGGTGCGGGGAGGCTGCTCCCTTTGCGGGGGAGC[CG]TTCCCCGTTCCCCCAGTGAGCTTCCCCAGCCGGAGGGTCTGGGACGGACGGAGGAGGCTG	CAGCCTCCTCCGTCCGTCCCAGACCCTCCGGCTGGGGAAGCTCACTGGGGGAACGGGGAA[CG]GCTCCCCCGCAAAGGGAGCAGCCTCCCCGCACCGAGTTCTCAGGTCTTTCCTCTCCTCAA	1				chr1:2018972-2020040	Island					1:2019829-2020438			FALSE		EH38D4329885	EH38E2778197|DNase-H3K4me3;EH38E2778197|Low-DNase	2;85	EnhA1;EnhBiv;ReprPCWk;Quies;TssBiv;Het;ReprPC;TssFlnk;EnhWk;TssFlnkD;Tx;TssFlnkU;TxWk;EnhA2;EnhG1;EnhG2	114;459;163;354;189;1;191;11;71;10;12;7;56;21;3;1	cg00580652
cg00581063	cg00581063	-0.0513175	0.0091417	-5.61356	1.98206e-08	0.000897528	cg00581063_TC21	14720885	TTACAATACCRAATAAAAACTACCTTACATACAAAAAACCTAACAACAAC						cg	R	T	C	2	II	1	11803332	Human	GRCh38	CGCTGCTGCCAGGCTCCTTGCATGCAAGGCAGCCCCCACCCGGCACTGCA	AGTGGCTCCATGCTCCTCAGCTATGGCTGTCCGGGCCGCCTCACTCAAAGCCTTGCCCTC[CG]CTGCTGCCAGGCTCCTTGCATGCAAGGCAGCCCCCACCCGGCACTGCAACATGCTCCTCG	CGAGGAGCATGTTGCAGTGCCGGGTGGGGGCTGCCTTGCATGCAAGGAGCCTGGCAGCAG[CG]GAGGGCAAGGCTTTGAGTGAGGCGGCCCGGACAGCCATAGCTGAGGAGCATGGAGCCACT	1				chr1:11805405-11806509	N_Shelf	exon_2;exon_1;exon_1;5UTR;5UTR	MTHFR;MTHFR;MTHFR;MTHFR;MTHFR	ENST00000376592.6;ENST00000641407.1;ENST00000641909.1;ENST00000376592.6;ENST00000641407.1			1:11863155-11864064	Promoter_Associated_Cell_type_specific	TRUE		EH38D4342910	EH38E2786595|Low-DNase;EH38E2786595|PLS;EH38E2786595|PLS/CTCF-bound	38;47;2	TxWk;TssFlnkU;Quies;TssA;EnhWk;EnhG2;TssFlnkD;TssFlnk;EnhA1;EnhA2	584;671;246;72;26;4;28;18;12;2
cg00587472	cg00587472	-0.0532235	0.0122547	-4.34312	1.40473e-05	0.0460078	cg00587472_TC21	52699305	TAATACCRAATACTTTTAATTTTTACCATTTCCCCTCCTATACAATTATC						cg	F	T	C	2	II	2	6812729	Human	GRCh38	CGATAACTGTACAGGAGGGGAAATGGCAAAAATCAAAAGCATCCGGCATT	TGAAGCAATCATAATGCCGGATGCTTTTGATTTTTGCCATTTCCCCTCCTGTACAGTTAT[CG]TTCCCATATCAAATTCAACATTTATTTTAGCTACTTCCTTTTATTCAGTTCAAAGCATTC	TGAAGCAATCATAATGCCGGATGCTTTTGATTTTTGCCATTTCCCCTCCTGTACAGTTAT[CG]TTCCCATATCAAATTCAACATTTATTTTAGCTACTTCCTTTTATTCAGTTCAAAGCATTC	1													FALSE					Quies;ReprPCWk;EnhA2;EnhA1;ReprPC;Het;EnhWk;EnhBiv;ZNF/Rpts;TssFlnkU;TxWk	1289;227;25;5;60;25;11;5;4;6;6	cg00587472
cg00601157	cg00601157	-0.0404829	0.0077503	-5.2234	1.75666e-07	0.00333052	cg00601157_BC21	88724499	TTACCTTACTCCTCTCACTAATAAATAACATCAAATAAACTAACCAAAAC						cg	F	B	C	2	II	3	46971495	Human	GRCh38	TGCCTTGCTCCTCTCACTAATAAGTGGCATCAGGTGGGCTGACCAGGACG	TCCTCAGCCTCTTGCCTTGCTCCTCTCACTAATAAGTGGCATCAGGTGGGCTGACCAGGA[CG]TCTTTGTAAAACTACAGCTGCATGACTACAAGAGAGTTTTGCGCAGAATAATACACGGAA	TTCCGTGTATTATTCTGCGCAAAACTCTCTTGTAGTCATGCAGCTGTAGTTTTACAAAGA[CG]TCCTGGTCAGCCCACCTGATGCCACTTATTAGTGAGAGGAGCAAGGCAAGAGGCTGAGGA	1													FALSE		EH38D5448604	EH38E3510880|dELS;EH38E3510880|Low-DNase	1;86	EnhWk;Tx;EnhA2;TxWk;EnhA1;EnhG2;TssFlnkU;Quies;EnhG1;TssFlnkD	379;13;377;400;292;60;31;56;52;3
cg00607062	cg00607062	-0.0350518	0.00742711	-4.71944	2.36492e-06	0.0156157	cg00607062_BC21	62757208	AACCATTAATAACACTCCCAAAAAAACATAAAAACAACAATCAAACACCC						cg	F	B	C	2	II	8	14319416	Human	GRCh38	ACCATTAATAACACTCCCAGAAAAGCATAAAGGCAACAGTCAGACACCCG	AGGAAGGCATGAACCATTAATAACACTCCCAGAAAAGCATAAAGGCAACAGTCAGACACC[CG]AAGCATGAATGATTTCAAGGATTAAAAAACCAACTAGCACTGTTACAGTTCTTTCAGAAT	ATTCTGAAAGAACTGTAACAGTGCTAGTTGGTTTTTTAATCCTTGAAATCATTCATGCTT[CG]GGTGTCTGACTGTTGCCTTTATGCTTTTCTGGGAGTGTTATTAATGGTTCATGCCTTCCT	1						TSS200	ENSG00000252264.1	ENST00000516455.1					FALSE		EH38D5928030	EH38E3819002|Low-DNase	87	Quies;ZNF/Rpts;Het;EnhWk;ReprPCWk	1611;1;40;1;10
cg00609473	cg00609473	-0.0316289	0.00712335	-4.44018	8.9884e-06	0.035242	cg00609473_BC21	43621448	CAAAATAAAACTACCCAAATAAAACAACTAAATTTCCTTCCTCAAAACCC						cg	F	B	C	2	II	14	22882633	Human	GRCh38	AAAATGAAGCTGCCCAAATGAAGCAGCTGAATTTCCTTCCTCAGAGCCCG	GAACTTAGTGGCAAAATGAAGCTGCCCAAATGAAGCAGCTGAATTTCCTTCCTCAGAGCC[CG]CATCTGCCTAGGGGCTGGGAAATGAGTACTTTCGTGGCTCTTAGCCCAGAAGAGGCAGGG	CCCTGCCTCTTCTGGGCTAAGAGCCACGAAAGTACTCATTTCCCAGCCCCTAGGCAGATG[CG]GGCTCTGAGGAAGGAAATTCAGCTGCTTCATTTGGGCAGCTTCATTTTGCCACTAAGTTC	1	TSS1500	REM2	NM_173527.3	chr14:22886529-22887193	N_Shelf	TSS1500;TSS1500	ENSG00000139890.10;ENSG00000139890.10	ENST00000536884.1;ENST00000267396.9					FALSE		EH38D4801453	EH38E3086519|DNase-only;EH38E3086519|Low-DNase;EH38E3086519|pELS	1;84;2	Quies;ReprPCWk;TxWk;EnhA1;EnhWk;ReprPC;EnhA2;EnhBiv;TssFlnkU;TssFlnkD;TssBiv;TssFlnk;Het	622;125;193;250;337;21;35;46;22;5;4;2;1	cg00609473
cg00609731	cg00609731	-0.0140492	0.00311753	-4.50652	6.59e-06	0.029395	cg00609731_TC21	80810853	ATATATAACAAAAACTCTAACAATATCAAAACTCTCTAATCTACTCTTCC						cg	R	T	C	2	II	17	68346505	Human	GRCh38	CGGAAGAGCAGATCAGAGAGTTCTGACACTGTCAGAGCTCTTGCCACACA	ACATTCTTTTCTTTGCCCCCTCACCATGGGGGTGGCGTCCCTGGGGTCTACTCCTCAGAG[CG]GAAGAGCAGATCAGAGAGTTCTGACACTGTCAGAGCTCTTGCCACACATTGCCCGATTAT	ATAATCGGGCAATGTGTGGCAAGAGCTCTGACAGTGTCAGAACTCTCTGATCTGCTCTTC[CG]CTCTGAGGAGTAGACCCCAGGGACGCCACCCCCATGGTGAGGGGGCAAAGAAAAGAATGT	1						TSS1500;TSS1500	ENSG00000141337.13;ENSG00000141337.13	ENST00000582154.5;ENST00000581032.1			17:66342517-66343119	Promoter_Associated	TRUE		EH38D5034838	EH38E3239473|dELS;EH38E3239473|dELS/CTCF-bound;EH38E3239473|DNase-only;EH38E3239473|Low-DNase	14;2;9;62	Quies;TssFlnkU;EnhWk;EnhA2;TxWk;TssA;Het;EnhA1;ReprPCWk;EnhBiv;EnhG1;Tx;ReprPC;ZNF/Rpts;TssFlnkD;TssFlnk	1353;103;24;35;63;4;10;48;14;1;1;3;1;1;1;1
cg00612672	cg00612672	-0.0412981	0.00723359	-5.70922	1.13498e-08	0.000661635	cg00612672_BC21	88692393	ACTCTCACATTCTACCTTTAATTTAAACAAAAACCACATTTTACAAACCC						cg	R	B	C	2	II	15	59328181	Human	GRCh38	CTCTCACATTCTACCTTTGGTTTGAGCAAAGGCCACATTTTGCAAGCCCG	GCAGAGGTGTCAGCAGAGGGTGAGAGAAAGTTCACCCTGACAGATTAACTGGGCAGCAAA[CG]GGCTTGCAAAATGTGGCCTTTGCTCAAACCAAAGGTAGAATGTGAGAGTGGAGTAGTACA	GCAGAGGTGTCAGCAGAGGGTGAGAGAAAGTTCACCCTGACAGATTAACTGGGCAGCAAA[CG]GGCTTGCAAAATGTGGCCTTTGCTCAAACCAAAGGTAGAATGTGAGAGTGGAGTAGTACA	1													FALSE		EH38D4878865	EH38E3137067|dELS;EH38E3137067|DNase-only;EH38E3137067|Low-DNase	2;3;82	TxWk;Quies;EnhWk;Tx;EnhA1;ZNF/Rpts;EnhA2;ReprPCWk;TssFlnkD;EnhG1;Het;EnhG2	415;895;240;41;44;6;7;7;1;3;3;1
cg00626977	cg00626977	-0.0316727	0.00699942	-4.52504	6.03834e-06	0.0277646	cg00626977_BC21	41804199	TTAAAACATCTAAAACACATAACCCTAATTCTAATAACAATAAAACACCC						cg	R	B	C	2	II	2	70455272	Human	GRCh38	TGAGACATCTGAAACACATGGCCCTGGTTCTGGTAACAGTGAGGCACCCG	CTTGGTCCAGGAGAAGGATGTGAGCAGGTTGTGGCTACTGTCAACAAGCTGGGGCTCTAA[CG]GGTGCCTCACTGTTACCAGAACCAGGGCCATGTGTTTCAGATGTCTCAATAGCCACAAAC	CTTGGTCCAGGAGAAGGATGTGAGCAGGTTGTGGCTACTGTCAACAAGCTGGGGCTCTAA[CG]GGTGCCTCACTGTTACCAGAACCAGGGCCATGTGTTTCAGATGTCTCAATAGCCACAAAC	1													FALSE		EH38D5201283	EH38E3350904|dELS;EH38E3350904|Low-DNase	1;86	Tx;TxWk;Quies;EnhWk;ReprPCWk;EnhA2;EnhG1;ReprPC	579;321;608;3;137;3;7;5
cg00636922	cg00636922	-0.0601874	0.0137289	-4.384	1.16522e-05	0.0412248	cg00636922_BC21	81651507	TAATTTATATAACATCRAAAATCCACAAAACCTAACAAAAACCAAATACC						cg	F	B	C	2	II	10	43899562	Human	GRCh38	GGTTTATATGGCATCGGAAATCCACAAGGCCTGGCAAAAGCCAGATGCCG	ACTTCCAGGTGTGGTTTATATGGCATCGGAAATCCACAAGGCCTGGCAAAAGCCAGATGC[CG]TCTTAGTGGTAGGGAGTACAAGGTGCAACAGCATGTCTTTCACCCCAGAAGAAACGTCCC	GGGACGTTTCTTCTGGGGTGAAAGACATGCTGTTGCACCTTGTACTCCCTACCACTAAGA[CG]GCATCTGGCTTTTGCCAGGCCTTGTGGATTTCCGATGCCATATAAACCACACCTGGAAGT	1													FALSE		EH38D2337852	EH38E1464233|CTCF-only/CTCF-bound;EH38E1464233|DNase-only;EH38E1464233|Low-DNase	2;2;83	EnhWk;EnhG1;Quies;TxWk;EnhG2;EnhA1;EnhA2;ReprPCWk;TssFlnk;TssFlnkU;TssFlnkD;Het;Tx;ReprPC;TssA;EnhBiv	383;21;630;366;19;73;24;102;4;14;10;4;6;1;3;3
cg00642359	cg00642359	-0.0305556	0.00628332	-4.86297	1.15635e-06	0.00993162	cg00642359_BC21	11767891	CTACTTCTTATCCTCAAAACAAAACCTTACRCRAACACAAAACCCTAAAC						cg	R	B	C	2	II	12	114403903	Human	GRCh38	TGCTTCTTGTCCTCAGAGCAGAACCTTGCGCGGGCACAGGGCCCTGGGCG	GCGTCAGGCTCCAGAGGCGTGTGCGCCAGGCCAAAGCCCTCGTCTGCGTCGGCCATGGTG[CG]CCCAGGGCCCTGTGCCCGCGCAAGGTTCTGCTCTGAGGACAAGAAGCAGGGGGAGATGGG	GCGTCAGGCTCCAGAGGCGTGTGCGCCAGGCCAAAGCCCTCGTCTGCGTCGGCCATGGTG[CG]CCCAGGGCCCTGTGCCCGCGCAAGGTTCTGCTCTGAGGACAAGAAGCAGGGGGAGATGGG	1	exon_2;5UTR;exon_2;5UTR	TBX5;TBX5;TBX5;TBX5	NM_000192.3;NM_000192.3;NM_181486.4;NM_181486.4	chr12:114400507-114401084;chr12:114403048-114403258;chr12:114405217-114405805	S_Shelf;S_Shore;N_Shore	exon_2;exon_2;exon_1;5UTR;5UTR;TSS200	TBX5;TBX5;TBX5;TBX5;TBX5;ENSG00000089225.20	ENST00000405440.7;ENST00000310346.8;ENST00000552726.1;ENST00000310346.8;ENST00000405440.7;ENST00000526441.1			12:114840555-114842091	Unclassified_Cell_type_specific	TRUE		EH38D2610038	EH38E1646317|DNase-only;EH38E1646317|Low-DNase;EH38E1646317|PLS;EH38E1646317|PLS/CTCF-bound	2;79;5;1	TssA;TssBiv;ReprPC;EnhBiv;ReprPCWk;TssFlnk;Quies;TssFlnkU;TssFlnkD;TxWk;Het;EnhA2	747;366;340;46;30;76;11;40;2;1;1;3	cg00642359
cg00642565	cg00642565	-0.0718291	0.0130617	-5.4992	3.81521e-08	0.00134371	cg00642565_TC21	2804922	ATACCRTTAATTATATATCTAACTACTTCTCTTCCATTACAAACAAACAC						cg	F	T	C	2	II	16	81843903	Human	GRCh38	CGTGTCTGTCTGCAATGGAAGAGAAGCAGTTAGACACACAACCAACGGCA	CCGGGTTTGATGTGCCGTTGGTTGTGTGTCTAACTGCTTCTCTTCCATTGCAGACAGACA[CG]CCTTTCCTTTCCTTTTCTGTTTCTGTTTCCTTTTCCTTTTTCCTTTTCGTTTTTCTTTTG	CCGGGTTTGATGTGCCGTTGGTTGTGTGTCTAACTGCTTCTCTTCCATTGCAGACAGACA[CG]CCTTTCCTTTCCTTTTCTGTTTCTGTTTCCTTTTCCTTTTTCCTTTTCGTTTTTCTTTTG	1													FALSE		EH38D4966552	EH38E3193967|Low-DNase	87	Quies;ReprPC;EnhA1;TxWk;ReprPCWk;EnhWk;EnhA2;Het;TssFlnkU;EnhBiv;EnhG2;EnhG1;Tx	1218;4;84;112;107;39;66;15;9;1;5;2;1
cg00648532	cg00648532	-0.0333057	0.00728062	-4.57456	4.77211e-06	0.0239866	cg00648532_TC21	49660205	TATCTCTAATCTAAACAACCCCAATCAAACTAAATTATAACAACAAAATC						cg	R	T	C	2	II	12	106907006	Human	GRCh38	CGATCCTGCTGTCACAACCCAGCCTGATTGGGGCTGCTCAGATTAGAGAT	TTCTCAACTCCTGTTCTATTTGTTCTATTTCCTTCCAGTCATGTGGCAGAAACACACCAG[CG]ATCCTGCTGTCACAACCCAGCCTGATTGGGGCTGCTCAGATTAGAGATAAGCATGAGATG	CATCTCATGCTTATCTCTAATCTGAGCAGCCCCAATCAGGCTGGGTTGTGACAGCAGGAT[CG]CTGGTGTGTTTCTGCCACATGACTGGAAGGAAATAGAACAAATAGAACAGGAGTTGAGAA	1													FALSE		EH38D2603043			Quies;TxWk;ReprPCWk;ReprPC;ZNF/Rpts;Het;EnhBiv;EnhWk	1093;97;284;183;2;2;1;1
cg00651020	cg00651020	-0.00860612	0.00186094	-4.62461	3.75295e-06	0.020764	cg00651020_TC21	59771145	AATACTTCCAATATTAATCAACCCAAAATAAAACTCTCTTCTTAAAAATC						cg	F	T	C	2	II	2	179861849	Human	GRCh38	CGATCTCCAAGAAGAGAGTTTCACTCTGGGTTGACTAATATTGGAAGCAT	GCGATGGGGCGGATGCTTCCAATATTAGTCAACCCAGAGTGAAACTCTCTTCTTGGAGAT[CG]TCAGACCAACTATTTGTTTTTCCTCTTTGACCACCCCTGGGCTAGCAGAGCACAGCTAGC	GCGATGGGGCGGATGCTTCCAATATTAGTCAACCCAGAGTGAAACTCTCTTCTTGGAGAT[CG]TCAGACCAACTATTTGTTTTTCCTCTTTGACCACCCCTGGGCTAGCAGAGCACAGCTAGC	1	TSS1500;TSS1500;TSS1500;TSS1500;TSS1500;TSS1500;TSS1500;TSS1500;TSS1500;TSS1500;TSS1500	MIR1258;ZNF385B;ZNF385B;ZNF385B;ZNF385B;ZNF385B;ZNF385B;ZNF385B;ZNF385B;ZNF385B;ZNF385B	NR_031659.1;NM_001352808.2;NM_001352809.2;NM_001352811.2;NM_001352810.2;NM_152520.6;NM_001352816.2;NR_148058.2;NR_148056.2;NR_148054.2;NR_148057.2	chr2:179861145-179861738	S_Shore	TSS1500;TSS1500	ENSG00000144331.20;ENSG00000221240.1	ENST00000410066.7;ENST00000408313.1					FALSE		EH38D5260605	EH38E3387819|DNase-H3K4me3;EH38E3387819|Low-DNase;EH38E3387819|pELS	5;81;1	Quies;TssBiv;ReprPCWk;TssFlnk;TssFlnkD;TxWk;TssA;EnhBiv;ReprPC;Tx;TssFlnkU;Het;EnhWk;ZNF/Rpts	809;650;7;54;23;8;21;41;12;2;20;9;5;2	cg00651020
cg00664054	cg00664054	-0.0362878	0.00826199	-4.39214	1.12242e-05	0.0403619	cg00664054_TC21	3683503	CCTTACCAAATAACCATTTCCCCCCACTAAAATACAAAATAACAATACCC						cg	F	T	C	2	II	8	22140796	Human	GRCh38	CGGGTACTGCCACCTTGCACCCCAGTGGGGGGAAATGGCCACTTGGCAAG	CCCCACTCCCACCTTGCCAAGTGGCCATTTCCCCCCACTGGGGTGCAAGGTGGCAGTACC[CG]CCCTGTTTTTCTCGCTTGGCTTGTACAACCCGTGCCTGAGTCAGAGCCCTGGAGGCCACC	CCCCACTCCCACCTTGCCAAGTGGCCATTTCCCCCCACTGGGGTGCAAGGTGGCAGTACC[CG]CCCTGTTTTTCTCGCTTGGCTTGTACAACCCGTGCCTGAGTCAGAGCCCTGGAGGCCACC	1				chr8:22141198-22142031	N_Shore								FALSE		EH38D5932503	EH38E3821989|DNase-H3K4me3;EH38E3821989|DNase-H3K4me3/CTCF-bound;EH38E3821989|DNase-only;EH38E3821989|Low-DNase;EH38E3821989|pELS;EH38E3821989|pELS/CTCF-bound	11;1;1;41;30;3	Quies;EnhWk;TssFlnkD;TssFlnkU;TxWk;EnhA1;ReprPCWk;TssFlnk;TssA;Tx;EnhA2;EnhG2;TssBiv;EnhBiv;ReprPC	745;42;351;353;39;24;51;25;13;6;3;5;2;2;2	cg00664054
cg00673404	cg00673404	-0.044618	0.0096137	-4.64108	3.46592e-06	0.0198562	cg00673404_TC21	53640291	AATACTTTCTATTTCCTCTAATAAATAAACAACACATACTTTAAAACTCC						cg	R	T	C	2	II	2	230659238	Human	GRCh38	CGGAGTCTCAAAGTATGTGCTGCCCACTCACCAGAGGAAACAGAAAGCAC	TGCTCCCCACCCCCACCTAGTGAGTCAATTTCAGTACCTGGGCCCTCTAATTCTGCCCTG[CG]GAGTCTCAAAGTATGTGCTGCCCACTCACCAGAGGAAACAGAAAGCACCTTCTCAGAATA	TATTCTGAGAAGGTGCTTTCTGTTTCCTCTGGTGAGTGGGCAGCACATACTTTGAGACTC[CG]CAGGGCAGAATTAGAGGGCCCAGGTACTGAAATTGACTCACTAGGTGGGGGTGGGGAGCA	1									chr2:230659139-230659615		2:231523516-231524498	Promoter_Associated	TRUE		EH38D5287007	EH38E3405602|dELS;EH38E3405602|Low-DNase	3;84	Tx;TxWk;Quies;EnhA1;EnhWk;EnhA2;TssFlnkU;TssA;ReprPCWk;TssFlnkD;TssFlnk;Het;ReprPC	539;306;559;52;75;39;77;2;6;2;1;2;3
cg00676711	cg00676711	-0.0288568	0.00619108	-4.66103	3.14637e-06	0.0186744	cg00676711_TC21	91789365	CCTTCCTCAAAATAAAAACTTCCTCTTATTCACATATATATCCTAAATAC						cg	R	T	C	2	II	8	21410831	Human	GRCh38	CGTATCTAGGACACACATGTGAATAAGAGGAAGTCCCCACCCTGAGGAAG	CTTATAATGGTGACATCTGTTCAGCAAAAGTGTGGAGCCCCTATGTTGTGCTAGAGACCA[CG]TATCTAGGACACACATGTGAATAAGAGGAAGTCCCCACCCTGAGGAAGGAGGAAAGCAGC	GCTGCTTTCCTCCTTCCTCAGGGTGGGGACTTCCTCTTATTCACATGTGTGTCCTAGATA[CG]TGGTCTCTAGCACAACATAGGGGCTCCACACTTTTGCTGAACAGATGTCACCATTATAAG	1													FALSE		EH38D4069576			Quies;ReprPCWk;ReprPC;Het;EnhA2;TxWk;EnhWk;EnhA1;EnhBiv;ZNF/Rpts;EnhG1	1150;298;113;49;3;3;18;23;4;1;1	cg00676711
cg00690082	cg00690082	-0.0356584	0.00732009	-4.87131	1.10863e-06	0.00969414	cg00690082_TC21	25808431	TCAATACTAACTTTTTAAAACCTAAAACTACCCACACTAAAACCAAACCC						cg	F	T	C	2	II	17	42286493	Human	GRCh38	CGGGCTTGGCTTTAGTGTGGGTAGTCCTAGGTCCTAAAAAGCTAGCATTG	ACTCTGGCACCTCAATGCTAGCTTTTTAGGACCTAGGACTACCCACACTAAAGCCAAGCC[CG]GCCCAACCAAGACAGATGTTTGGTGGGTGGGGCTGCCTGCTGGAGCAACAGGCCTCTGCA	ACTCTGGCACCTCAATGCTAGCTTTTTAGGACCTAGGACTACCCACACTAAAGCCAAGCC[CG]GCCCAACCAAGACAGATGTTTGGTGGGTGGGGCTGCCTGCTGGAGCAACAGGCCTCTGCA	1	TSS1500	STAT5A	NM_003152.4	chr17:42288170-42288996	N_Shore	TSS1500	ENSG00000126561.18	ENST00000345506.8	chr17:42286278-42286568				FALSE		EH38D2932464	EH38E1863378|CTCF-only/CTCF-bound;EH38E1863378|DNase-only;EH38E1863378|Low-DNase;EH38E1863378|pELS	1;3;74;9	Tx;EnhG1;Quies;ReprPCWk;EnhA1;TssFlnkU;EnhWk;TxWk;EnhG2;TssFlnkD;EnhA2;ReprPC;TssA;EnhBiv	584;178;234;149;145;67;162;77;18;16;21;7;3;2	cg00690082
cg00704059	cg00704059	-0.0260917	0.00562359	-4.63969	3.48924e-06	0.0199506	cg00704059_TC21	96626916	AAAATTCTATTAATATCTAACATACCACATTCACAAAACTAACCACTTAC						cg	R	T	C	2	II	3	172182359	Human	GRCh38	CGTAAGTGGCCAGCCTTGTGAATGTGGTATGCTAGACACCAACAGAACTT	TGGTGGCTGTCCGGGGTCTTCTCACATTAGCAGCTGGAGAGCCAGGGCTGAAGGTTGAGT[CG]TAAGTGGCCAGCCTTGTGAATGTGGTATGCTAGACACCAACAGAACTTCCTGGAGCTGGG	CCCAGCTCCAGGAAGTTCTGTTGGTGTCTAGCATACCACATTCACAAGGCTGGCCACTTA[CG]ACTCAACCTTCAGCCCTGGCTCTCCAGCTGCTAATGTGAGAAGACCCCGGACAGCCACCA	1													FALSE		EH38D5514750	EH38E3553766|dELS;EH38E3553766|DNase-only;EH38E3553766|Low-DNase	9;10;68	Quies;ReprPCWk;EnhWk;EnhA1;EnhA2;TxWk;EnhG1;EnhG2;TssFlnkU;ReprPC;TssFlnkD	880;103;417;208;16;24;9;1;2;1;2
cg00704359	cg00704359	-0.042515	0.00981345	-4.33231	1.4755e-05	0.0472723	cg00704359_BC21	70653931	ACTCAATAACTTACCCAAAATCTCAAAATTCAAACCAAATTTCACTTTAC						cg	F	B	C	2	II	14	73402787	Human	GRCh38	CTCAGTAACTTGCCCAAGGTCTCAAGATTCAAGCCAAGTTTCACTTTGCG	GAAGCTTATAAACTCAGTAACTTGCCCAAGGTCTCAAGATTCAAGCCAAGTTTCACTTTG[CG]TTATCAAAAGCTCACTTTCACAACTAAATTTAAAATTATCTTTACTATTTTTAGTCCTTT	AAAGGACTAAAAATAGTAAAGATAATTTTAAATTTAGTTGTGAAAGTGAGCTTTTGATAA[CG]CAAAGTGAAACTTGGCTTGAATCTTGAGACCTTGGGCAAGTTACTGAGTTTATAAGCTTC	1													FALSE		EH38D4827832	EH38E3104093|dELS;EH38E3104093|Low-DNase	1;86	Quies;TxWk;EnhWk;Tx;EnhA2;EnhA1;EnhG1;TssA;TssFlnkU	760;851;25;5;9;9;1;1;2
cg00704995	cg00704995	-0.0467513	0.00855741	-5.46326	4.67472e-08	0.00147258	cg00704995_BC21	99796980	CAAAATTCAAATACTTATTCCCTAAAACTCATACTACATACACATATTCC						cg	R	B	C	2	II	4	88593458	Human	GRCh38	AAAGTTCAAATACTTATTCCCTGGAGCTCATGCTGCATACACATATTCCG	GGAGCATGTGTAACCTGAAACAGGTGAGCCTATGGAGACAGTACCTAATGCGACTGTGCA[CG]GAATATGTGTATGCAGCATGAGCTCCAGGGAATAAGTATTTGAACTTTGCTGTTGGTCTG	GGAGCATGTGTAACCTGAAACAGGTGAGCCTATGGAGACAGTACCTAATGCGACTGTGCA[CG]GAATATGTGTATGCAGCATGAGCTCCAGGGAATAAGTATTTGAACTTTGCTGTTGGTCTG	1				chr4:88591877-88593330	S_Shore	exon_1;5UTR	HERC3;HERC3	ENST00000452979.5;ENST00000452979.5					FALSE					ZNF/Rpts;Quies;TssBiv;Het;TssFlnkU;TssA;TssFlnkD;TssFlnk;EnhA2;ReprPCWk;EnhWk;TxWk;EnhA1	229;241;264;357;312;63;89;85;4;5;8;2;4
cg00709073	cg00709073	-0.0452309	0.00967936	-4.67292	2.96945e-06	0.0179499	cg00709073_TC21	79636105	ACAAAACCTTAACTCAATAACAAAACAAAACTTCCRTATTTAATCACATC						cg	F	T	C	2	II	13	45342422	Human	GRCh38	CGATGTGACTAAATACGGAAGTTTTGTTTTGCTATTGAGCCAAGGTCTTG	TGAATGACAGAGCAAGACCTTGGCTCAATAGCAAAACAAAACTTCCGTATTTAGTCACAT[CG]TCACATCTTTGGCATAAGGCAAAGATACATGCCAGTATGAAGTCTGAAAGCTTGTTCTAT	TGAATGACAGAGCAAGACCTTGGCTCAATAGCAAAACAAAACTTCCGTATTTAGTCACAT[CG]TCACATCTTTGGCATAAGGCAAAGATACATGCCAGTATGAAGTCTGAAAGCTTGTTCTAT	1	TSS1500;TSS1500;TSS1500	TPT1;TPT1;TPT1	NM_001286272.2;NM_003295.4;NM_001286273.2	chr13:45340482-45341521	S_Shore	TSS1500;TSS1500;TSS1500;TSS1500;TSS1500;TSS1500;TSS1500;TSS1500;TSS1500	ENSG00000133112.17;ENSG00000133112.17;ENSG00000133112.17;ENSG00000133112.17;ENSG00000133112.17;ENSG00000133112.17;ENSG00000133112.17;ENSG00000133112.17;ENSG00000133112.17	ENST00000530705.6;ENST00000616577.4;ENST00000379056.5;ENST00000490277.1;ENST00000379060.8;ENST00000379055.5;ENST00000309246.9;ENST00000527226.2;ENST00000442760.2					FALSE		EH38D2649666	EH38E1673401|Low-DNase;EH38E1673401|pELS;EH38E1673401|pELS/CTCF-bound	45;41;1	Quies;ReprPCWk;TssFlnkU;TssFlnk;EnhWk;TssA;TxWk;TssFlnkD;EnhA1;EnhA2	649;3;529;54;115;123;65;80;24;21
cg00710425	cg00710425	-0.0232696	0.00518447	-4.48834	7.17813e-06	0.0309303	cg00710425_BC21	84760375	TCAACAATCTTACCTTTAAAACAACTAATATTATTCTATCTTCCATTATC						cg	R	B	C	2	II	12	71105671	Human	GRCh38	CAGCAGTCTTGCCTTTAAAGCAACTAATATTGTTCTGTCTTCCATTGTCG	CTTTGCAAGCATACCTGAAGCAAAGATTCAAGTCTAGGAAAAAGACAATCCTTCCACATT[CG]ACAATGGAAGACAGAACAATATTAGTTGCTTTAAAGGCAAGACTGCTGAGTCCTACATAC	CTTTGCAAGCATACCTGAAGCAAAGATTCAAGTCTAGGAAAAAGACAATCCTTCCACATT[CG]ACAATGGAAGACAGAACAATATTAGTTGCTTTAAAGGCAAGACTGCTGAGTCCTACATAC	1						TSS1500	ENSG00000257454.1	ENST00000548497.1					FALSE					Quies;ReprPCWk;Het;EnhWk;TxWk;EnhA2;EnhA1	1538;19;96;4;2;3;1
cg00719439	cg00719439	-0.0338071	0.00621776	-5.43719	5.41286e-08	0.00162036	cg00719439_BC21	22711391	TCTCTACCAAAATATTCTTTCCTTCTTCTACCTTAACTAACCTAAAATCC						cg	R	B	C	2	II	20	31821522	Human	GRCh38	CTCTGCCAGGATGTTCTTTCCTTCTTCTGCCTTGGCTGGCCTGGGATCCG	AGCCCCCAAGCGAGGCATCAGAGCTCACCTTTGAAGGGGTGCCCATGACCCACAGCCCCA[CG]GATCCCAGGCCAGCCAAGGCAGAAGAAGGAAAGAACATCCTGGCAGAGAGCCAGAAGGAA	AGCCCCCAAGCGAGGCATCAGAGCTCACCTTTGAAGGGGTGCCCATGACCCACAGCCCCA[CG]GATCCCAGGCCAGCCAAGGCAGAAGAAGGAAAGAACATCCTGGCAGAGAGCCAGAAGGAA	1	exon_4	MYLK2	NM_033118.4	chr20:31822744-31823029	N_Shore	exon_3;exon_4	MYLK2;MYLK2	ENST00000375994.6;ENST00000375985.5		20:31821506-31823225			FALSE		EH38D5320240	EH38E3426968|dELS;EH38E3426968|Low-DNase	4;83	ReprPCWk;Quies;TxWk;ReprPC;EnhA2;EnhBiv;EnhWk;TssFlnkD;TssFlnkU;EnhA1;TssA;EnhG2;TssFlnk	561;753;141;142;41;4;8;2;2;3;4;1;1	cg00719439
cg00725213	cg00725213	-0.0521227	0.0120857	-4.31275	1.61236e-05	0.0499238	cg00725213_TC21	39758499	CTTAAATCTCCAAAAAATCATCTCTCCAAATATATACRCATATCRAAAAC						cg	F	T	C	2	II	9	120928393	Human	GRCh38	CGTCCCCGACATGCGTATACACTTGGAGAGATGATTCCCTGGAGATCCAA	CTATACAGGCACTTGGATCTCCAGGGAATCATCTCTCCAAGTGTATACGCATGTCGGGGA[CG]CCAAATGCCCTGGGCCCGCCCCAGTTTCTATCCAACCAGCCCTCCTGCCAGCACCTGACC	CTATACAGGCACTTGGATCTCCAGGGAATCATCTCTCCAAGTGTATACGCATGTCGGGGA[CG]CCAAATGCCCTGGGCCCGCCCCAGTTTCTATCCAACCAGCCCTCCTGCCAGCACCTGACC	1				chr9:120928493-120929397	N_Shore						9:123690593-123690734	Promoter_Associated	TRUE		EH38D6061417	EH38E3905607|DNase-H3K4me3;EH38E3905607|Low-DNase;EH38E3905607|pELS;EH38E3905607|pELS/CTCF-bound	3;34;49;1	Quies;TssFlnkU;TssBiv;TssA;TssFlnkD;EnhA2;TssFlnk;ReprPCWk;TxWk;EnhBiv;EnhA1;Het;EnhWk;ReprPC;EnhG2	817;480;51;125;50;12;65;15;18;2;7;7;10;3;1
cg00732815	cg00732815	-0.0246697	0.00546452	-4.51452	6.34594e-06	0.0287316	cg00732815_BC21	14608489	CCTAACAACCTTCTTTAACTCAACTTCCTCTCCCTACTTCATCTAAAAAC						cg	R	B	C	2	II	20	46008342	Human	GRCh38	CTGACAGCCTTCTTTGACTCAGCTTCCTCTCCCTGCTTCATCTGGGGGCG	GAAGACAGGGGGTTGCCCCAGTGGAATTCCCCAGCCTTGCCTAGCAGAGCCCATTCCTTC[CG]CCCCCAGATGAAGCAGGGAGAGGAAGCTGAGTCAAAGAAGGCTGTCAGGGAGGGAAAAAG	GAAGACAGGGGGTTGCCCCAGTGGAATTCCCCAGCCTTGCCTAGCAGAGCCCATTCCTTC[CG]CCCCCAGATGAAGCAGGGAGAGGAAGCTGAGTCAAAGAAGGCTGTCAGGGAGGGAAAAAG	1	TSS1500	MMP9	NM_004994.3	chr20:46010496-46011349;chr20:46011649-46012571	N_Shelf;N_Shelf	TSS1500	ENSG00000100985.7	ENST00000372330.3					FALSE		EH38D3304173	EH38E2115903|DNase-H3K4me3/CTCF-bound;EH38E2115903|DNase-only;EH38E2115903|Low-DNase;EH38E2115903|pELS	1;2;81;3	Quies;EnhWk;ReprPC;ReprPCWk;EnhBiv;TxWk;EnhA2;EnhA1;TssFlnkU;TssBiv;TssFlnkD;Het	634;70;428;127;145;104;112;30;4;5;2;2	cg00732815
cg00745568	cg00745568	-0.0649528	0.0133472	-4.86641	1.13646e-06	0.00982482	cg00745568_BC21	49600254	CTCTAAACAAATATAAACATATCTCRCTCATCCAATACATAAAAAACCAC						cg	F	B	C	2	II	14	53615416	Human	GRCh38	TCTAGGCAGGTGTGAGCATATCTCGCTCATCCAATACATAAAAGACCACG	CTACTTGGATTCTCTAGGCAGGTGTGAGCATATCTCGCTCATCCAATACATAAAAGACCA[CG]TGCATTTTCAAAGGGATTTCTGCAATCCCTTTTGCAATCTTTTGACAACCACTACTATGA	TCATAGTAGTGGTTGTCAAAAGATTGCAAAAGGGATTGCAGAAATCCCTTTGAAAATGCA[CG]TGGTCTTTTATGTATTGGATGAGCGAGATATGCTCACACCTGCCTAGAGAATCCAAGTAG	1						TSS1500	ENSG00000225680.1	ENST00000436530.1					FALSE		EH38D4815510	EH38E3095383|Low-DNase;EH38E3095383|pELS	86;1	TxWk;EnhA1;Quies;EnhWk;EnhA2;ReprPCWk;Het;TssFlnkU;TssFlnkD;TssFlnk;EnhG2;ReprPC	207;26;1213;156;4;34;6;8;6;1;1;1
cg00748053	cg00748053	-0.0444557	0.00944579	-4.7064	2.52125e-06	0.0162064	cg00748053_TC21	86732286	AAAACTCAACCTTCCTTCTTTATATTTCTACCCTTTAACTATATAAAAAC						cg	F	T	C	2	II	8	34280084	Human	GRCh38	CGTCCTCACATAGCCAAAGGGCAGAAACACAAAGAAGGAAGGCTGAGTTC	AGGGCCTGGAGGGAACTCAGCCTTCCTTCTTTGTGTTTCTGCCCTTTGGCTATGTGAGGA[CG]CAGCTTTCGTTCCCTCTAAGTCTCAGCAACAAGGCACCATCTTGGAAGCAGAGACCTAGT	AGGGCCTGGAGGGAACTCAGCCTTCCTTCTTTGTGTTTCTGCCCTTTGGCTATGTGAGGA[CG]CAGCTTTCGTTCCCTCTAAGTCTCAGCAACAAGGCACCATCTTGGAAGCAGAGACCTAGT	1													FALSE		EH38D4080840	EH38E2623575|CTCF-only/CTCF-bound;EH38E2623575|Low-DNase	6;81	Quies;Het;EnhA2;EnhWk;ZNF/Rpts;TxWk;TssFlnkD;ReprPCWk	1550;83;8;9;3;7;1;2
cg00748912	cg00748912	-0.0373815	0.00832299	-4.49135	7.07728e-06	0.0306877	cg00748912_BC21	60674883	AAAAAAACTTCTTCTATAACCAAATAAAAAACATCAAATCCTTCCCTTAC						cg	R	B	C	2	II	11	18384651	Human	GRCh38	AGAAGGCTTCTTCTGTGGCCAGATAAAGGACATCAGGTCCTTCCCTTGCG	CTCTTCTGGTCAGGGTGAAAACACCCTGAGAGAATGCTTGTGAAAGCCACCACAGCTACA[CG]CAAGGGAAGGACCTGATGTCCTTTATCTGGCCACAGAAGAAGCCTTCTCCACATCGGCAC	CTCTTCTGGTCAGGGTGAAAACACCCTGAGAGAATGCTTGTGAAAGCCACCACAGCTACA[CG]CAAGGGAAGGACCTGATGTCCTTTATCTGGCCACAGAAGAAGCCTTCTCCACATCGGCAC	1											11:18404811-18406386	Unclassified	TRUE		EH38D4588079	EH38E2947992|dELS;EH38E2947992|dELS/CTCF-bound;EH38E2947992|Low-DNase	29;1;57	Tx;EnhA1;Quies;TssFlnkU;EnhA2;TxWk;TssA;ReprPCWk;EnhWk	645;623;15;121;54;183;11;1;10
cg00752121	cg00752121	-0.0349581	0.00715203	-4.88786	1.0194e-06	0.00920754	cg00752121_BC21	59656863	TCATAAACTACCAAAACCAACCTCTACTAATTAAATATCAATTCTCTACC						cg	R	B	C	2	II	2	190334661	Human	GRCh38	CATAAACTGCCAAGGCCAACCTCTGCTGATTAGATGTCAGTTCTCTGCCG	AATGGGAGGAAATGAGTCATTGATAACATGCTTGCTCCAGAGGATAACCTTTGTACCAAA[CG]GCAGAGAACTGACATCTAATCAGCAGAGGTTGGCCTTGGCAGTTTATGAAGGAACGTCCA	AATGGGAGGAAATGAGTCATTGATAACATGCTTGCTCCAGAGGATAACCTTTGTACCAAA[CG]GCAGAGAACTGACATCTAATCAGCAGAGGTTGGCCTTGGCAGTTTATGAAGGAACGTCCA	1													FALSE		EH38D3223224	EH38E2060623|dELS;EH38E2060623|DNase-only;EH38E2060623|Low-DNase	11;2;74	Tx;Quies;EnhA2;EnhA1;TxWk;EnhG1;EnhWk;TssA;TssFlnk;TssFlnkD;ReprPCWk;TssFlnkU	764;587;155;39;70;2;32;4;3;1;3;3
cg00769876	cg00769876	-0.0261671	0.00590905	-4.42831	9.49765e-06	0.0364776	cg00769876_BC21	70657477	CTCTACCTTCTTTAAACACAAATTAAACAATCAACCACCTATAATTAACC						cg	F	B	C	2	II	10	37752314	Human	GRCh38	TCTGCCTTCTTTGAACACAGATTGAGCAGTCAGCCACCTGTGATTGGCCG	CACAGCTCCACCTCTGCCTTCTTTGAACACAGATTGAGCAGTCAGCCACCTGTGATTGGC[CG]AAGCTCTGATTGGTACAATCACAATTGTAGGTGCCAGCCTGTTACACATCCTGTTAGGTT	AACCTAACAGGATGTGTAACAGGCTGGCACCTACAATTGTGATTGTACCAATCAGAGCTT[CG]GCCAATCACAGGTGGCTGACTGCTCAATCTGTGTTCAAAGAAGGCAGAGGTGGAGCTGTG	1													FALSE					Het;Quies;ZNF/Rpts;ReprPCWk;TxWk	789;414;452;7;1
cg00788611	cg00788611	-0.0466429	0.0100948	-4.6205	3.82817e-06	0.0210584	cg00788611_BC21	59795102	ATTCCCAAAATAAATCTATTCTTCTCAACRTTTTTCATTTAAAAAACCCC						cg	F	B	C	2	II	3	13648124	Human	GRCh38	TTCCCAAGGTAAATCTGTTCTTCTCAACGTTTTTCATTTGGAAGACCCCG	TCTTTCTTATGGTTCCCAAGGTAAATCTGTTCTTCTCAACGTTTTTCATTTGGAAGACCC[CG]TTGCCCCACAGCACCTTATGGCTTCTGCAAAATAGACTGGGTCCACTGCAAAGCCCTGTC	GACAGGGCTTTGCAGTGGACCCAGTCTATTTTGCAGAAGCCATAAGGTGCTGTGGGGCAA[CG]GGGTCTTCCAAATGAAAAACGTTGAGAAGAACAGATTTACCTTGGGAACCATAAGAAAGA	1											3:13688925-13690284	Unclassified	TRUE					Quies;ReprPCWk;EnhBiv;EnhWk;TxWk;ReprPC;TssBiv;TssFlnkU;TssFlnkD;EnhA1;EnhA2;Het;TssFlnk	746;125;406;155;61;15;24;31;29;60;1;7;3
cg00789034	cg00789034	-0.0142026	0.00308441	-4.60464	4.13184e-06	0.022035	cg00789034_BC21	31690980	ACACRTAATCRAAAACACAATCATTTCCCTCTTAATATTTTATTCATACC						cg	R	B	C	2	II	6	157824058	Human	GRCh38	CACGTAATCGAAAGCACAGTCATTTCCCTCTTGATATTTTATTCATGCCG	CCTTCGCTGCTGTTATTTTTTTCTTTTGTTTTGCTACCTTTTCATTGTGAATGGCATTGC[CG]GCATGAATAAAATATCAAGAGGGAAATGACTGTGCTTTCGATTACGTGTTTGCCTGAAAA	CCTTCGCTGCTGTTATTTTTTTCTTTTGTTTTGCTACCTTTTCATTGTGAATGGCATTGC[CG]GCATGAATAAAATATCAAGAGGGAAATGACTGTGCTTTCGATTACGTGTTTGCCTGAAAA	1				chr6:157822569-157824003	S_Shore								FALSE		EH38D5808788	EH38E3743789|DNase-H3K4me3;EH38E3743789|Low-DNase;EH38E3743789|pELS;EH38E3743789|pELS/CTCF-bound	1;21;52;13	Quies;TxWk;TssA;TssFlnkU;ReprPCWk;TssFlnk;Het;TssFlnkD;TssBiv;EnhA2;EnhWk;ReprPC	726;85;726;83;8;7;4;2;10;3;7;2	cg00789034
cg00795520	cg00795520	0.0503148	0.0109845	4.58051	4.63844e-06	0.0236309	cg00795520_BC21	81711335	TAATACTTTCTCTCCTACAACCCATTTATAAAAACACTACTTTTAAATAC						cg	F	B	C	2	II	6	149368638	Human	GRCh38	AGTACTTTCTCTCCTGCAACCCATTTATAGAAACACTACTTTTGAATGCG	TTACTCATTTCTAGTACTTTCTCTCCTGCAACCCATTTATAGAAACACTACTTTTGAATG[CG]AAAATTTGTGTGTGTGTGTGTGTGTGTGTGTGTGTGTGTGTTTACACAGAAATACTTTTG	CAAAAGTATTTCTGTGTAAACACACACACACACACACACACACACACACACACAAATTTT[CG]CATTCAAAAGTAGTGTTTCTATAAATGGGTTGCAGGAGAGAAAGTACTAGAAATGAGTAA	1													FALSE		EH38D3916187			Quies;ReprPCWk;TxWk;EnhWk;EnhA1;EnhA2;TssFlnkD;TssFlnkU;EnhG2	980;10;443;205;14;6;2;2;1
cg00802903	cg00802903	-0.107163	0.0242165	-4.4252	9.63546e-06	0.0367402	cg00802903_TC11	37789861	AACTCACAAAAAATTTTATAACTCATTTATAAAAAATCATACAAAAATCA	28707365	AACTCACGAAAAATTTTATAACTCGTTTATAAAAAATCATACGAAAATCG	C	Grn	G	cg	F	T	C	1	I	7	155799569	Human	GRCh38	CGACTTCCGTATGACTTCTTACAAACGAGTCACAAAACCCTTCGTGAGCC	CGGAAACGGCAGGGCTCACGAAGGGTTTTGTGACTCGTTTGTAAGAAGTCATACGGAAGT[CG]CTTCCTGGGCTTCTCAGCCTCCTAGAGTGGATCACCATCCGGAAGGACGGAGCGCGTGCG	CGGAAACGGCAGGGCTCACGAAGGGTTTTGTGACTCGTTTGTAAGAAGTCATACGGAAGT[CG]CTTCCTGGGCTTCTCAGCCTCCTAGAGTGGATCACCATCCGGAAGGACGGAGCGCGTGCG	1				chr7:155796569-155797172;chr7:155802998-155810541	S_Shelf;N_Shelf								FALSE		EH38D5913729			Quies;ReprPCWk;ReprPC;Het;EnhBiv;EnhWk;TxWk;TssBiv;EnhA2	403;208;644;339;45;3;14;6;1	cg00802903
cg00827176	cg00827176	-0.0286035	0.00629382	-4.54469	5.50154e-06	0.0261009	cg00827176_BC21	41604566	ACTACCTAATTTTATAAATAATTTTACTAAAAACACAACCACACTCATTC						cg	F	B	C	2	II	8	22028191	Human	GRCh38	CTGCCTGGTTTTGTAAGTAGTTTTACTGGGAACACAGCCACACTCATTCG	GAATCTAGGCTGCTGCCTGGTTTTGTAAGTAGTTTTACTGGGAACACAGCCACACTCATT[CG]TTTGTACCCTGTCCATGGCTGCTTTTCCTCCCTAACAGCAGATTTGAGTAGTCTCCATGG	CCATGGAGACTACTCAAATCTGCTGTTAGGGAGGAAAAGCAGCCATGGACAGGGTACAAA[CG]AATGAGTGTGGCTGTGTTCCCAGTAAAACTACTTACAAAACCAGGCAGCAGCCTAGATTC	1				chr8:22024734-22025372	S_Shelf								FALSE		EH38D4070169			TxWk;ReprPCWk;ReprPC;Quies;EnhA1;EnhG1;EnhWk;EnhG2;TssFlnkU;Tx;EnhA2;TssA	479;594;91;250;122;23;78;7;4;6;8;1	cg00827176
cg00834192	cg00834192	-0.0332197	0.00709264	-4.68368	2.81764e-06	0.0173213	cg00834192_BC21	71680148	CATTAAATCCACCTACACTACCTTAATAATACTATTAATACCTTACTCCC						cg	F	B	C	2	II	8	10053894	Human	GRCh38	ATTAAGTCCACCTACACTGCCTTAATGGTGCTGTTGGTGCCTTGCTCCCG	TACAACACCACCATTAAGTCCACCTACACTGCCTTAATGGTGCTGTTGGTGCCTTGCTCC[CG]TATTTTGGCCGCTGCAAAATGGGCTTAAATATGTTTGTAAATACATAACTTAATATTGAA	TTCAATATTAAGTTATGTATTTACAAACATATTTAAGCCCATTTTGCAGCGGCCAAAATA[CG]GGAGCAAGGCACCAACAGCACCATTAAGGCAGTGTAGGTGGACTTAATGGTGGTGTTGTA	1	TSS1500;TSS1500	MSRA;MSRA	NM_001135670.3_2;NM_012331.5_2	chr8:10054119-10055123	N_Shore	exon_1;TSS1500;TSS1500;TSS1500	MSRA-DT;ENSG00000175806.15;ENSG00000175806.15;ENSG00000175806.15	ENST00000562143.1;ENST00000317173.9;ENST00000441698.6;ENST00000518255.5					FALSE					EnhA2;ReprPCWk;TssA;Quies;TssFlnk;TssFlnkU;TxWk;TssFlnkD;EnhWk;EnhA1;Het;TssBiv	81;7;347;712;60;368;26;39;13;3;4;3
cg00849990	cg00849990	-0.0485342	0.010931	-4.44004	8.99404e-06	0.035242	cg00849990_TC11	54649183	ATTTAAAAAAATTCAACAACACTCAAAATAATAAAAATATAATCACTCCA	30714273	ATTTAAAAAAATTCAACAACGCTCAAAATAATAAAAATATAATCACTCCG	C	Grn	G	cg	F	T	C	1	I	8	85178538	Human	GRCh38	CGGAGTGACCACATTCTCATTATCCTGAGCGCTGTTGAATTCTTCCAAAT	GATCTAGGAAGGATTTGGAAGAATTCAACAGCGCTCAGGATAATGAGAATGTGGTCACTC[CG]CGCGAAGTTTAAGAACTAAAGTTTTAGAAACAAACAAACAAAAAACACTAACTGCCCAAT	GATCTAGGAAGGATTTGGAAGAATTCAACAGCGCTCAGGATAATGAGAATGTGGTCACTC[CG]CGCGAAGTTTAAGAACTAAAGTTTTAGAAACAAACAAACAAAAAACACTAACTGCCCAAT	1	TSS1500	E2F5-DT	NR_134311.1	chr8:85176966-85178052	S_Shore	TSS1500;TSS1500;TSS1500	ENSG00000260493.1;ENSG00000260493.1;ENSG00000254208.1	ENST00000562577.1;ENST00000566000.1;ENST00000520129.1					FALSE		EH38D5965320	EH38E3843039|DNase-H3K4me3;EH38E3843039|Low-DNase;EH38E3843039|pELS	2;80;5	Quies;TssFlnkU;TssFlnk;TssFlnkD;TssA;EnhWk;Het;EnhA2;TssBiv;TxWk;EnhA1;EnhBiv;ReprPCWk;ReprPC	800;356;176;180;25;51;47;8;3;5;8;1;1;2	cg00849990
cg00852595	cg00852595	-0.0462783	0.00899625	-5.14417	2.68702e-07	0.00432481	cg00852595_BC21	94743469	AACAACTTAATATACCTTCTTCTACTACCTAATTTTAAAAACTATATAAC						cg	R	B	C	2	II	12	99154659	Human	GRCh38	ACAGCTTGATATGCCTTCTTCTGCTGCCTGGTTTTGGGGGCTGTATGACG	GAGTATGACTTGATCCTAGCTCCACATTTCTTACATATTAATCTTTACTACCGACCAGTA[CG]TCATACAGCCCCCAAAACCAGGCAGCAGAAGAAGGCATATCAAGCTGTCAGCTTGGGCTG	GAGTATGACTTGATCCTAGCTCCACATTTCTTACATATTAATCTTTACTACCGACCAGTA[CG]TCATACAGCCCCCAAAACCAGGCAGCAGAAGAAGGCATATCAAGCTGTCAGCTTGGGCTG	1	exon_1;5UTR;exon_1;5UTR;exon_1;5UTR;exon_1;5UTR;exon_1;5UTR;exon_1;5UTR;exon_1;5UTR;exon_1;5UTR;exon_1;5UTR;exon_1;5UTR;exon_1;5UTR;exon_1;5UTR;exon_1;5UTR;exon_1;5UTR;exon_1;5UTR;exon_1;5UTR;exon_1;5UTR;exon_1;5UTR	ANKS1B;ANKS1B;ANKS1B;ANKS1B;ANKS1B;ANKS1B;ANKS1B;ANKS1B;ANKS1B;ANKS1B;ANKS1B;ANKS1B;ANKS1B;ANKS1B;ANKS1B;ANKS1B;ANKS1B;ANKS1B;ANKS1B;ANKS1B;ANKS1B;ANKS1B;ANKS1B;ANKS1B;ANKS1B;ANKS1B;ANKS1B;ANKS1B;ANKS1B;ANKS1B;ANKS1B;ANKS1B;ANKS1B;ANKS1B;ANKS1B;ANKS1B	NM_001204068.2;NM_001204068.2;NM_001204069.2;NM_001204069.2;NM_001204070.2;NM_001204070.2;NM_001352194.2;NM_001352194.2;NM_001352195.2;NM_001352195.2;NM_001352196.2;NM_001352196.2;NM_001352197.2;NM_001352197.2;NM_001352198.2;NM_001352198.2;NM_001352199.2;NM_001352199.2;NM_001352200.2;NM_001352200.2;NM_001352201.2;NM_001352201.2;NM_001352202.2;NM_001352202.2;NM_001352203.2;NM_001352203.2;NM_001352…			exon_1;exon_1;exon_1;exon_1;5UTR;5UTR;5UTR;TSS200;TSS200	ANKS1B;ANKS1B;ANKS1B;ANKS1B;ANKS1B;ANKS1B;ANKS1B;ENSG00000185046.20;ENSG00000185046.20	ENST00000549558.6;ENST00000550693.6;ENST00000549493.6;ENST00000552245.5;ENST00000549493.6;ENST00000549558.6;ENST00000550693.6;ENST00000546568.5;ENST00000546960.5					FALSE					Quies;ReprPCWk;TssFlnk;TssFlnkD;TssA;TxWk;EnhWk;ZNF/Rpts;Tx;ReprPC;Het;TssFlnkU;EnhA2;EnhA1;EnhG1	1260;83;133;44;28;27;23;2;15;6;10;27;3;1;1	cg00852595
cg00853979	cg00853979	-0.0315802	0.00638235	-4.94805	7.49613e-07	0.00768035	cg00853979_TC21	26749135	CTTAAAATTAAAAACCTCCTAACTAAAAACTAAAAACTAACCATACTCAC						cg	F	T	C	2	II	1	32215767	Human	GRCh38	CGTGAGTATGGCCAGCCTCCAGCTCTCAGCCAGGAGGTCCCCAACCCCAA	TTTCTTCCTTCCTTGGGGTTGGGGACCTCCTGGCTGAGAGCTGGAGGCTGGCCATACTCA[CG]GCTCCATTCTGTATGGCCTTCCACCTCCTGCAGAGGGCAGCACAGATAGTGGAAGAGGCC	TTTCTTCCTTCCTTGGGGTTGGGGACCTCCTGGCTGAGAGCTGGAGGCTGGCCATACTCA[CG]GCTCCATTCTGTATGGCCTTCCACCTCCTGCAGAGGGCAGCACAGATAGTGGAAGAGGCC	1	exon_8;exon_9	TMEM234;TMEM234	NR_133635.2;NR_133636.2			exon_2;exon_1;exon_9;exon_8;exon_8;3UTR;3UTR;3UTR	TMEM234;TMEM234;TMEM234;TMEM234;TMEM234;TMEM234;TMEM234;TMEM234	ENST00000466796.1;ENST00000495091.5;ENST00000491434.5;ENST00000489170.5;ENST00000461402.5;ENST00000461402.5;ENST00000489170.5;ENST00000491434.5			1:32680243-32682092	Unclassified	TRUE		EH38D4365206	EH38E2800915|CTCF-only/CTCF-bound;EH38E2800915|dELS/CTCF-bound;EH38E2800915|DNase-only;EH38E2800915|Low-DNase	48;18;1;20	EnhWk;ReprPC;Tx;TxWk;EnhA1;Quies;EnhG1;ReprPCWk;EnhG2;EnhA2;EnhBiv	94;11;371;714;50;228;90;50;21;31;3	cg00853979
cg00858941	cg00858941	-0.0338918	0.00761336	-4.45162	8.52251e-06	0.034155	cg00858941_TC21	90732136	CAAATTATCTAATAAACATAAAACCACTAAACCAATCATCCAACACACAC						cg	R	T	C	2	II	11	100832046	Human	GRCh38	CGTGTGTGCTGGATGATTGGCTCAGTGGCTCTATGTCTATCAGATAATCT	TTTTGTGGACTGGCAGGTTGGTCTCTTGAATCCACTGGGTCTGTTTCCCCTTGTGCAGCA[CG]TGTGTGCTGGATGATTGGCTCAGTGGCTCTATGTCTATCAGATAATCTGGCCTCTCTTGC	GCAAGAGAGGCCAGATTATCTGATAGACATAGAGCCACTGAGCCAATCATCCAGCACACA[CG]TGCTGCACAAGGGGAAACAGACCCAGTGGATTCAAGAGACCAACCTGCCAGTCCACAAAA	1													FALSE		EH38D4638485	EH38E2980875|dELS;EH38E2980875|DNase-only;EH38E2980875|Low-DNase	4;2;81	Quies;EnhWk;TxWk;TssFlnkU;EnhA1;Tx;EnhA2;Het;EnhG1;ReprPCWk;ReprPC;TssFlnkD	1091;257;179;2;81;30;12;4;2;3;1;1
cg00860402	cg00860402	-0.0651805	0.0116579	-5.5911	2.25641e-08	0.000961658	cg00860402_BC21	67750223	AAATTATTAATCCCCAATCAAAAATATATATCCCAACTAAAATATATCCC						cg	F	B	C	2	II	2	74026450	Human	GRCh38	GATTGTTAATCCCCAGTCAGAGGTGTGTGTCCCAACTGAGGTATGTCCCG	CCAGTGGCCGGGGATTGTTAATCCCCAGTCAGAGGTGTGTGTCCCAACTGAGGTATGTCC[CG]AGGGTGAGCCAGAGGGAGCAGGTTGCCTGTTCTCGGACCTAAGGAGGTTCCAGAGTGGTT	AACCACTCTGGAACCTCCTTAGGTCCGAGAACAGGCAACCTGCTCCCTCTGGCTCACCCT[CG]GGACATACCTCAGTTGGGACACACACCTCTGACTGGGGATTAACAATCCCCGGCCACTGG	1													FALSE		EH38D3141674	EH38E2010110|dELS;EH38E2010110|Low-DNase	3;84	Quies;EnhA1;EnhWk;TxWk;EnhA2;TssFlnkU;TssFlnkD;TssA	1264;176;105;68;39;7;2;2
cg00860550	cg00860550	-0.0171865	0.00376022	-4.57062	4.86276e-06	0.0242499	cg00860550_TC21	12722879	ACTTACTATCTAACCTATATCCTTAACRAAATATAAAACAAAAACTAACC						cg	F	T	C	2	II	19	3757459	Human	GRCh38	CGGCCAGCCTCTGTTCTACACTTCGCTAAGGATATAGGTCAGATAGTAAG	TCCCGGCCAGAACTTACTATCTGACCTATATCCTTAGCGAAGTGTAGAACAGAGGCTGGC[CG]CGGTGGCTCACACCTGTAATCCCAGCATTTTGGGAGGCCGAGGCGGGTGGATCACAAGGT	TCCCGGCCAGAACTTACTATCTGACCTATATCCTTAGCGAAGTGTAGAACAGAGGCTGGC[CG]CGGTGGCTCACACCTGTAATCCCAGCATTTTGGGAGGCCGAGGCGGGTGGATCACAAGGT	1				chr19:3753746-3754259	S_Shelf	TSS1500;TSS1500	ENSG00000011132.12;ENSG00000267138.1	ENST00000590064.1;ENST00000591962.1					FALSE					TxWk;EnhG1;Tx;Quies;EnhWk	1461;12;102;86;2	cg00860550
cg00877894	cg00877894	-0.0347439	0.00798838	-4.3493	1.36572e-05	0.0453303	cg00877894_TC21	40725985	AATAAACTCTCTTCTACAATATAACACCTTCTTTACTAATAAACCATTAC						cg	F	T	C	2	II	20	59435170	Human	GRCh38	CGTAATGGTCTATTAGTAAAGAAGGTGTCACATTGCAGAAGAGAGTTTAT	TAGTGGCAGATGATAAACTCTCTTCTGCAATGTGACACCTTCTTTACTAATAGACCATTA[CG]CTGTCTGAATCAGAGTTTCACTGATTAAACAGGAAATGCCATCTGTAGAGTCTGGTATCC	TAGTGGCAGATGATAAACTCTCTTCTGCAATGTGACACCTTCTTTACTAATAGACCATTA[CG]CTGTCTGAATCAGAGTTTCACTGATTAAACAGGAAATGCCATCTGTAGAGTCTGGTATCC	1													FALSE		EH38D3317616			Quies;ReprPCWk;Het;TxWk;ReprPC;EnhA2;EnhWk	1196;305;136;10;7;4;5
cg00882517	cg00882517	-0.0217275	0.00499962	-4.34583	1.38751e-05	0.0457687	cg00882517_TC21	95672145	AAAAAAAACAAACCRACCTCTTCCCATTTCTCTACTTAACTATATAAAAC						cg	R	T	C	2	II	21	29300025	Human	GRCh38	CGCTTCACATAGTCAAGCAGAGAAATGGGAAGAGGTCGGCTTGCTTCTTC	ATGCAGTTCAGAAGGATAAAGGGTGGAAATCCCAGATGTGTTAGTGGCAGAGCACTTGAG[CG]CTTCACATAGTCAAGCAGAGAAATGGGAAGAGGTCGGCTTGCTTCTTCCTGGTCTTTGGG	CCCAAAGACCAGGAAGAAGCAAGCCGACCTCTTCCCATTTCTCTGCTTGACTATGTGAAG[CG]CTCAAGTGCTCTGCCACTAACACATCTGGGATTTCCACCCTTTATCCTTCTGAACTGCAT	1				chr21:29298423-29299465	S_Shore	TSS200;TSS1500	ENSG00000156273.16;ENSG00000156273.16	ENST00000451655.5;ENST00000447177.5					FALSE					Quies;TssFlnkU;TssA;TssFlnkD;TssFlnk;Het;EnhA2;EnhA1;TxWk	823;475;327;8;19;6;1;3;1
cg00890518	cg00890518	-0.0330259	0.00759775	-4.3468	1.38138e-05	0.0456856	cg00890518_TC21	60645357	TATTCTATATCCAAAACCRAAATCTATAATCCTACAAATTTACACCTAAC						cg	R	T	C	2	II	4	6907959	Human	GRCh38	CGCCAGGTGCAAATCTGCAGGACCACAGACTTCGGTTCTGGATACAGAAC	CTCCGGGAGAGACGGAGTGGGCGCAGCAGGATGGCGAGTGAGGAAAAGGCAGGCAGAGGG[CG]CCAGGTGCAAATCTGCAGGACCACAGACTTCGGTTCTGGATACAGAACAATGGTTCCTTG	CAAGGAACCATTGTTCTGTATCCAGAACCGAAGTCTGTGGTCCTGCAGATTTGCACCTGG[CG]CCCTCTGCCTGCCTTTTCCTCACTCGCCATCCTGCTGCGCCCACTCCGTCTCTCCCGGAG	1				chr4:6909208-6910583	N_Shore	TSS1500;TSS1500	ENSG00000132405.19;ENSG00000132405.19	ENST00000444368.1;ENST00000448507.5			4:6909161-6911973	Promoter_Associated	TRUE		EH38D5540968	EH38E3570903|CTCF-only/CTCF-bound;EH38E3570903|DNase-H3K4me3/CTCF-bound;EH38E3570903|DNase-only;EH38E3570903|Low-DNase;EH38E3570903|pELS/CTCF-bound	39;4;1;42;1	EnhA2;TxWk;EnhWk;ReprPCWk;Quies;EnhBiv;EnhA1;ReprPC;TssFlnkD;TssBiv;TssFlnk;ZNF/Rpts;TssFlnkU	22;108;494;496;328;100;27;63;8;8;7;1;1
cg00933182	cg00933182	-0.0451806	0.0102671	-4.40052	1.07993e-05	0.0394616	cg00933182_BC21	14609169	CATCAAAAATTATTATTCTCCAAAATAAAAAACCCCCCTAAATCCCTAAC						cg	F	B	C	2	II	17	45220978	Human	GRCh38	ATCAGAGATTGTTATTCTCCAAGGTAAGAGGCCCCCCTAGATCCCTGGCG	TAATTAGCAGACATCAGAGATTGTTATTCTCCAAGGTAAGAGGCCCCCCTAGATCCCTGG[CG]GTGACAGTGTCAAGATTCTTTTTCCCTCCTCTGCGGTGCCCACTCCTTTTCCAGCCTTGT	ACAAGGCTGGAAAAGGAGTGGGCACCGCAGAGGAGGGAAAAAGAATCTTGACACTGTCAC[CG]CCAGGGATCTAGGGGGGCCTCTTACCTTGGAGAATAACAATCTCTGATGTCTGCTAATTA	1	TSS1500	FMNL1	NM_005892.4	chr17:45221358-45222370	N_Shore	exon_1;exon_1;TSS1500;TSS1500;TSS1500;TSS1500	FMNL1-DT;FMNL1-DT;ENSG00000267121.6;ENSG00000267121.6;ENSG00000184922.15;ENSG00000184922.15	ENST00000670229.1;ENST00000591365.1;ENST00000585471.1;ENST00000590522.1;ENST00000592415.1;ENST00000331495.8			17:43298159-43298346	Promoter_Associated_Cell_type_specific	TRUE		EH38D5016220	EH38E3226364|Low-DNase	87	Tx;ReprPC;TssFlnkU;TxWk;TssBiv;Quies;TssFlnk;EnhWk;EnhBiv;TssFlnkD;EnhA1;TssA;EnhA2;ReprPCWk;EnhG2	684;257;88;160;216;90;37;20;23;39;8;8;6;26;1	cg00933182
cg00934775	cg00934775	-0.0107032	0.00246653	-4.33938	1.42886e-05	0.0464567	cg00934775_BC21	51768272	RACCTAACTATAAACAACAAAATACTTCCCACAATACACCTATAACRTCC						cg	R	B	C	2	II	6	42879627	Human	GRCh38	GCCTGGCTGTGGACAGCAAAGTGCTTCCCACAATGCACCTATGGCGTCCG	TGTCTTCCTCCCCAGAGACGCAGCACAGCCGCGCCGGAAGTGCGGCGCCGTAGCTAGGAG[CG]GACGCCATAGGTGCATTGTGGGAAGCACTTTGCTGTCCACAGCCAGGCCGCTTGTGATGA	TGTCTTCCTCCCCAGAGACGCAGCACAGCCGCGCCGGAAGTGCGGCGCCGTAGCTAGGAG[CG]GACGCCATAGGTGCATTGTGGGAAGCACTTTGCTGTCCACAGCCAGGCCGCTTGTGATGA	1	5UTR;exon_1;5UTR;exon_1;exon_1;exon_1	RPL7L1;RPL7L1;RPL7L1;RPL7L1;RPL7L1;RPL7L1	NM_001366481.3;NM_001366481.3;NM_198486.5;NM_198486.5;NR_134562.3;NR_134563.3			exon_1;exon_1;5UTR;5UTR;TSS200;TSS200;TSS1500;TSS1500;TSS1500;TSS1500;TSS1500	RPL7L1;RPL7L1;RPL7L1;RPL7L1;ENSG00000146223.16;ENSG00000146223.16;ENSG00000146223.16;ENSG00000146223.16;ENSG00000146223.16;ENSG00000146223.16;ENSG00000146223.16	ENST00000493763.7;ENST00000483998.6;ENST00000483998.6;ENST00000493763.7;ENST00000397415.7;ENST00000304734.9;ENST00000487619.1;ENST00000492836.1;ENST00000497417.1;ENST00000602561.1;ENST00000462348.1			6:42846994-42848168	Promoter_Associated	TRUE		EH38D5754725	EH38E3708635|Low-DNase;EH38E3708635|PLS;EH38E3708635|PLS/CTCF-bound	6;64;17	TssFlnk;EnhWk;TssA;TssFlnkD;EnhBiv;TssFlnkU;EnhA1;ReprPC;Quies;TssBiv;ReprPCWk	273;21;867;60;46;18;2;32;147;168;29
cg00940577	cg00940577	-0.0506992	0.0092674	-5.4707	4.48258e-08	0.00144261	cg00940577_TC11	86739125	TCAACCACCACATCTAAAAAAAATAAACTAACTACTTCTACATACTCTCA	67775972	TCAACCGCCACATCTAAAAAAAATAAACTAACTACTTCTACATACTCTCG	A	Red	R	cg	R	T	C	1	I	17	30476866	Human	GRCh38	CGAGAGCATGTAGAAGCAGTTAGCTCACTCTTTCTAGATGTGGCGGCTGA	TTTATGTATCTATAAAGTGTGGGTTTGGACAGCAGATTTTATCAGGTTGAGGGCTCAGGC[CG]AGAGCATGTAGAAGCAGTTAGCTCACTCTTTCTAGATGTGGCGGCTGACAAGGACAAAGA	TCTTTGTCCTTGTCAGCCGCCACATCTAGAAAGAGTGAGCTAACTGCTTCTACATGCTCT[CG]GCCTGAGCCCTCAACCTGATAAAATCTGCTGTCCAAACCCACACTTTATAGATACATAAA	1	TSS1500;TSS1500;TSS1500	GOSR1;GOSR1;GOSR1	NM_001007025.2;NM_004871.3;NM_001007024.2	chr17:30477318-30477675	N_Shore	TSS1500;TSS1500;TSS1500;TSS1500;TSS1500;TSS1500;TSS1500;TSS1500;TSS1500	ENSG00000108587.16;ENSG00000108587.16;ENSG00000108587.16;ENSG00000108587.16;ENSG00000108587.16;ENSG00000108587.16;ENSG00000108587.16;ENSG00000108587.16;ENSG00000108587.16	ENST00000225724.9;ENST00000451249.7;ENST00000467635.6;ENST00000427274.6;ENST00000491489.6;ENST00000537788.6;ENST00000467337.6;ENST00000581721.5;ENST00000414833.2			17:28803761-28805195	Promoter_Associated	TRUE		EH38D5002166	EH38E3217029|DNase-H3K4me3;EH38E3217029|Low-DNase;EH38E3217029|pELS;EH38E3217029|pELS/CTCF-bound	1;84;1;1	TxWk;TssFlnkU;Quies;EnhA1;TssA;EnhA2;TssFlnk;EnhWk;TssFlnkD	532;550;317;42;71;30;38;32;51	cg00940577
cg00944015	cg00944015	-0.0270308	0.0059212	-4.56508	4.99305e-06	0.0246453	cg00944015_BC21	65787920	AATCTTTCCTATTTCCTAAATTCCTAAAACAACAACAATTCTAAACACAC						cg	R	B	C	2	II	1	180520017	Human	GRCh38	ATCTTTCCTGTTTCCTGAATTCCTGAGGCAGCAACAATTCTGAGCACACG	TGAGAGACAGGACTGCCACACATGAAAGAGAGAGAACCGTTATGTAAGTCAGCACTAAAT[CG]TGTGCTCAGAATTGTTGCTGCCTCAGGAATTCAGGAAACAGGAAAGATCTGTGAGGCCTG	TGAGAGACAGGACTGCCACACATGAAAGAGAGAGAACCGTTATGTAAGTCAGCACTAAAT[CG]TGTGCTCAGAATTGTTGCTGCCTCAGGAATTCAGGAAACAGGAAAGATCTGTGAGGCCTG	1						TSS1500	ENSG00000206905.1	ENST00000384178.1					FALSE		EH38D2246887	EH38E1402065|Low-DNase	87	Quies;ReprPCWk;TxWk;EnhA2;EnhWk;TssFlnk;EnhBiv;EnhA1	1416;25;177;16;24;1;1;3
cg00965578	cg00965578	-0.0318394	0.00549632	-5.79286	6.91991e-09	0.000513942	cg00965578_BC21	75675424	CAAAATATCATTTTAAACATAACAACTTCTAATTTCAATCTCACAACTTC						cg	R	B	C	2	II	22	36164753	Human	GRCh38	AATATTGTGAAATTATGGGGAGCTGCAGTTTTTTGCAATGATTTTGCCCG	CAGACCCACACCAGAATATCATTTTAAACATAACAACTTCTGGTTTCAGTCTCACAACTT[CG]GGCAAAATCATTGCAAAAAACTGCAGCTCCCCATAATTTCACAATATTGGTTGGGATCCC	CAGACCCACACCAGAATATCATTTTAAACATAACAACTTCTGGTTTCAGTCTCACAACTT[CG]GGCAAAATCATTGCAAAAAACTGCAGCTCCCCATAATTTCACAATATTGGTTGGGATCCC	1	5UTR;exon_1;5UTR;exon_1	APOL3;APOL3;APOL3;APOL3	NM_145641.3;NM_145641.3;NM_145642.3;NM_145642.3			exon_1;exon_1;5UTR;5UTR	APOL3;APOL3;APOL3;APOL3	ENST00000361710.6;ENST00000397287.6;ENST00000361710.6;ENST00000397287.6					FALSE		EH38D3368556	EH38E2161534|DNase-only;EH38E2161534|Low-DNase;EH38E2161534|pELS	1;85;1	Quies;TxWk;EnhA2;EnhWk;ReprPC;ReprPCWk;EnhA1;TssFlnkD;TssFlnkU	1144;286;44;46;48;63;29;2;1	cg00965578
cg00982082	cg00982082	-0.0582185	0.0130652	-4.45601	8.34991e-06	0.033703	cg00982082_TC21	61790420	TTAACTTTATAAATTCTATCAAACAAAAATAACTTCAACTACTACATACC						cg	F	T	C	2	II	13	89376037	Human	GRCh38	CGGTATGCAGCAGCTGAAGTCATTTCTGTTTGACAGAATCCATAAAGCCA	TATTACAGTGTTTGGCTTTATGGATTCTGTCAAACAGAAATGACTTCAGCTGCTGCATAC[CG]CTAGCTGTAACCCCTGCCAAGTTCTGTATAGAGGCCAGTAGAACAGCTTGTTGAAATTTC	TATTACAGTGTTTGGCTTTATGGATTCTGTCAAACAGAAATGACTTCAGCTGCTGCATAC[CG]CTAGCTGTAACCCCTGCCAAGTTCTGTATAGAGGCCAGTAGAACAGCTTGTTGAAATTTC	1													FALSE		EH38D4781719	EH38E3074234|DNase-only;EH38E3074234|Low-DNase	4;83	Het;Quies;EnhWk;EnhA2;ReprPCWk;TxWk;EnhA1;ZNF/Rpts	433;1148;45;24;3;4;5;1
cg01012943	cg01012943	-0.0265418	0.00593028	-4.47563	7.61857e-06	0.0320653	cg01012943_TC21	64643505	TCTATAACCCTAATATCTTATAATCCTCTACCCAAAAACAAAAAACTTTC						cg	R	T	C	2	II	3	47884828	Human	GRCh38	CGAAAGTCTCCTGCCCCTGGGTAGAGGATTACAAGACACCAGGGCTATAG	AACACCTACCTCGGGGGCTTTCTCTTGCTAAGGGGAAGGAAGTAGAGGTTCTGAAACCTA[CG]AAAGTCTCCTGCCCCTGGGTAGAGGATTACAAGACACCAGGGCTATAGAAGCCACTGGTG	CACCAGTGGCTTCTATAGCCCTGGTGTCTTGTAATCCTCTACCCAGGGGCAGGAGACTTT[CG]TAGGTTTCAGAACCTCTACTTCCTTCCCCTTAGCAAGAGAAAGCCCCCGAGGTAGGTGTT	1													FALSE		EH38D3423843			Tx;TxWk;ZNF/Rpts;Quies;EnhWk;EnhG1;EnhA1;EnhA2;Het	1013;353;106;141;17;25;2;2;4
cg01013600	cg01013600	-0.0125393	0.00285957	-4.38503	1.1597e-05	0.0410999	cg01013600_BC21	61741908	TTAAAAAACAAACTTCTTCCRAAAACCAATCTTCCTCTTTCTAAACCTCC						cg	R	B	C	2	II	19	48637920	Human	GRCh38	TAAAGAACAGACTTCTTCCGGAAACCAATCTTCCTCTTTCTAAACCTCCG	CTTAAAGGGGCCGCGGTCCTAAAGATGGTTTTGAGAAGCAGGAAGCCAAAATACCGAGAG[CG]GAGGTTTAGAAAGAGGAAGATTGGTTTCCGGAAGAAGTCTGTTCTTTAATACCCAAATGT	CTTAAAGGGGCCGCGGTCCTAAAGATGGTTTTGAGAAGCAGGAAGCCAAAATACCGAGAG[CG]GAGGTTTAGAAAGAGGAAGATTGGTTTCCGGAAGAAGTCTGTTCTTTAATACCCAAATGT	1	TSS200;TSS1500	SEC1P;DBP	NR_004401.2;NM_001352.5	chr19:48635571-48636144;chr19:48636899-48637874	S_Shore;S_Shore	TSS1500;TSS1500;TSS1500;TSS200;TSS200;TSS200	ENSG00000105516.11;ENSG00000105516.11;ENSG00000105516.11;ENSG00000232871.8;ENSG00000232871.8;ENSG00000232871.8	ENST00000222122.10;ENST00000594723.1;ENST00000601104.1;ENST00000474419.5;ENST00000483163.1;ENST00000430145.3			19:49139930-49141772	Promoter_Associated	TRUE					TxWk;TssA;Quies;Tx;TssFlnkU;EnhWk;TssFlnk;EnhA2;EnhA1;TssFlnkD	643;724;123;59;63;5;13;26;6;1	cg01013600
cg01041455	cg01041455	-0.0408921	0.0089222	-4.58319	4.57941e-06	0.0234821	cg01041455_BC21	66625939	AAATTTATATTTTCCAACTTCCCTTACAACCATCTCTAACTATAAACTAC						cg	R	B	C	2	II	3	161162195	Human	GRCh38	GATTTATATTTTCCAGCTTCCCTTACAGCCATCTCTGGCTATGAGCTACG	CTCTTTAAAGACACACCTAGAAGTGGAATCCATCATTTTCCTTCTACTCCATCTGCTAAA[CG]TAGCTCATAGCCAGAGATGGCTGTAAGGGAAGCTGGAAAATATAAATCTTATTCTGATGG	CTCTTTAAAGACACACCTAGAAGTGGAATCCATCATTTTCCTTCTACTCCATCTGCTAAA[CG]TAGCTCATAGCCAGAGATGGCTGTAAGGGAAGCTGGAAAATATAAATCTTATTCTGATGG	1				chr3:161161711-161161934	S_Shore								FALSE					Quies;Het;ZNF/Rpts;TxWk;EnhA2;EnhA1;ReprPCWk;EnhWk	1377;209;39;9;4;4;18;3	cg01041455
cg01044094	cg01044094	-0.0190723	0.00421442	-4.52549	6.02547e-06	0.0277519	cg01044094_TC21	85611338	AATCTCATTTCCATCTCAATTTAAACTCTCAAAAACCAAACTAACAATTC						cg	F	T	C	2	II	14	89418000	Human	GRCh38	CGAATTGTCAGTCTGGTTCCTGAGAGCTCAAACTGAGATGGAAATGAGAC	GAGAGAAAACAGGTCTCATTTCCATCTCAGTTTGAGCTCTCAGGAACCAGACTGACAATT[CG]CAAGCCACCCAGCGAAATGGTGCAGCCACCACTCTAAGTCTCTAGGCACCTCCAAATAAT	GAGAGAAAACAGGTCTCATTTCCATCTCAGTTTGAGCTCTCAGGAACCAGACTGACAATT[CG]CAAGCCACCCAGCGAAATGGTGCAGCCACCACTCTAAGTCTCTAGGCACCTCCAAATAAT	1	TSS1500	FOXN3	NM_005197.4	chr14:89416195-89417934	S_Shore	TSS1500	ENSG00000053254.16	ENST00000557258.6			14:89884062-89885211	Promoter_Associated	TRUE		EH38D4836819	EH38E3109806|DNase-H3K4me3/CTCF-bound;EH38E3109806|Low-DNase;EH38E3109806|pELS;EH38E3109806|pELS/CTCF-bound	2;15;24;46	ZNF/Rpts;Quies;TssFlnkU;Het;TssA;TxWk;TssFlnk;ReprPCWk;EnhA2;TssFlnkD;EnhA1;EnhBiv	325;274;610;215;193;4;9;31;4;14;2;1
cg01049520	cg01049520	-0.0459523	0.0106362	-4.32036	1.55778e-05	0.0489196	cg01049520_BC21	24786489	AACTAAAATAATAACAAACCCTAAACTCAACRTTCAAAACAACTAACTCC						cg	R	B	C	2	II	17	48501162	Human	GRCh38	GCTGGGATGGTGACAGGCCCTGGACTCAGCGTTCAGAGCAGCTGACTCCG	ATCTGAAGCTGGCGCTGGGTTCATTAAGAGACCTGGTGCAGTTTATCTGCTTCTTGTCCA[CG]GAGTCAGCTGCTCTGAACGCTGAGTCCAGGGCCTGTCACCATCCCAGCCCTGGTGGCGTC	ATCTGAAGCTGGCGCTGGGTTCATTAAGAGACCTGGTGCAGTTTATCTGCTTCTTGTCCA[CG]GAGTCAGCTGCTCTGAACGCTGAGTCCAGGGCCTGTCACCATCCCAGCCCTGGTGGCGTC	1													FALSE		EH38D2938428	EH38E1868016|CTCF-only/CTCF-bound;EH38E1868016|dELS/CTCF-bound;EH38E1868016|DNase-only;EH38E1868016|Low-DNase	6;1;1;79	TxWk;EnhWk;EnhA1;Quies;ReprPC;ReprPCWk;EnhBiv;EnhA2;TssFlnkD;ZNF/Rpts	520;143;226;285;107;199;148;31;3;1
cg01054615	cg01054615	-0.0306427	0.00692226	-4.42669	9.569e-06	0.0365854	cg01054615_TC21	8634263	AACRAACAAAAAACRAAACTACTACCAAATCTAATCAAACAAATAAAACC						cg	R	T	C	2	II	1	43366357	Human	GRCh38	CGGCTCCACCTGTCTGACTAGATCTGGCAGCAGCCCCGCCCTCTGCCCGC	CTCTCCTCTCGCAGAGCCCTTCCTCTCCTGGAGCCTGGCTCTTTGAGACTCCTGCCCCGG[CG]GCTCCACCTGTCTGACTAGATCTGGCAGCAGCCCCGCCCTCTGCCCGCCCCTGCTGTACT	AGTACAGCAGGGGCGGGCAGAGGGCGGGGCTGCTGCCAGATCTAGTCAGACAGGTGGAGC[CG]CCGGGGCAGGAGTCTCAAAGAGCCAGGCTCCAGGAGAGGAAGGGCTCTGCGAGAGGAGAG	1				chr1:43367143-43367402;chr1:43367875-43368466	N_Shore;N_Shore	exon_1;exon_2;exon_2;TSS1500;TSS1500;TSS200	ELOVL1;ELOVL1;ELOVL1;ENSG00000066322.15;ENSG00000066322.15;ENSG00000066322.15	ENST00000470769.5;ENST00000482302.5;ENST00000465321.5;ENST00000468865.6;ENST00000478481.5;ENST00000479439.5					FALSE		EH38D4375105	EH38E2807330|DNase-H3K4me3;EH38E2807330|DNase-only;EH38E2807330|Low-DNase;EH38E2807330|pELS;EH38E2807330|pELS/CTCF-bound	2;1;51;32;1	Quies;EnhA2;TxWk;EnhA1;TssFlnkU;TssA;ReprPCWk;EnhWk;TssFlnk;Het;EnhG2;TssFlnkD;ReprPC;EnhG1	736;88;40;177;344;34;71;69;29;16;3;49;5;2
cg01070065	cg01070065	-0.0165394	0.00313685	-5.2726	1.34504e-07	0.00282402	cg01070065_BC21	60613877	CTAATACAAATAACAAACTTAATCCATCTTCAATCRATACAACTAAACCC						cg	R	B	C	2	II	1	32248422	Human	GRCh38	TGGTGCAGGTGACAGGCTTGGTCCATCTTCAGTCGGTGCAGCTGGGCCCG	CGGCCGCAGCGGGAGATGCAGGCGCAGGACAGGCAGCTGGCAGGGCAGCTGCTGCGGCTG[CG]GGCCCAGCTGCACCGACTGAAGATGGACCAAGCCTGTCACCTGCACCAGGAGCTGCTGGA	CGGCCGCAGCGGGAGATGCAGGCGCAGGACAGGCAGCTGGCAGGGCAGCTGCTGCGGCTG[CG]GGCCCAGCTGCACCGACTGAAGATGGACCAAGCCTGTCACCTGCACCAGGAGCTGCTGGA	1	exon_2	FAM167B	NM_032648.3			exon_2	FAM167B	ENST00000373582.4			1:32713257-32714695	Unclassified	TRUE		EH38D4365241	EH38E2800944|CTCF-only/CTCF-bound;EH38E2800944|DNase-H3K4me3/CTCF-bound;EH38E2800944|Low-DNase;EH38E2800944|pELS;EH38E2800944|pELS/CTCF-bound	26;5;11;1;44	TxWk;EnhA1;TssA;ReprPCWk;TssFlnkU;Quies;EnhWk;EnhA2;TssFlnk;ZNF/Rpts;EnhBiv;TssFlnkD;ReprPC;TssBiv	124;519;18;37;273;274;266;88;14;1;7;36;4;2	cg01070065
cg01083340	cg01083340	-0.0210166	0.00426958	-4.92239	8.54924e-07	0.00829975	cg01083340_TC21	75768990	TTCCCAAAAACCCAAAACCCATTCATTCCCAACTAATCTTATTATATCCC						cg	R	T	C	2	II	11	66408794	Human	GRCh38	CGGGACACAACAAGATCAGCTGGGAATGAATGGGTCCTGGGCTTTTGGGA	AGCCAGGGAGCCCTGAACCAGAGGGTCAAGGACCCCTGGACGGAGTATTCCCCGGGCTCC[CG]GGACACAACAAGATCAGCTGGGAATGAATGGGTCCTGGGCTTTTGGGAATCTGAGTGGGG	CCCCACTCAGATTCCCAAAAGCCCAGGACCCATTCATTCCCAGCTGATCTTGTTGTGTCC[CG]GGAGCCCGGGGAATACTCCGTCCAGGGGTCCTTGACCCTCTGGTTCAGGGCTCCCTGGCT	1				chr11:66408563-66409258	Island	TSS1500;TSS1500;TSS1500;TSS1500;TSS1500;TSS1500;TSS1500;TSS1500;TSS1500	ENSG00000254510.3;ENSG00000254510.3;ENSG00000254510.3;ENSG00000254510.3;ENSG00000254510.3;ENSG00000254510.3;ENSG00000254510.3;ENSG00000254510.3;ENSG00000254510.3	ENST00000527061.1;ENST00000685629.1;ENST00000686306.1;ENST00000526186.2;ENST00000533759.1;ENST00000689212.1;ENST00000685966.1;ENST00000692623.1;ENST00000658173.2			11:66175758-66177101	Unclassified	TRUE					EnhG2;TssFlnkU;TssFlnkD;TssA;TssBiv;EnhG1;EnhWk;Quies;TssFlnk;Tx;ReprPCWk;EnhBiv;TxWk;EnhA2;ReprPC;EnhA1	242;352;522;69;167;40;38;7;159;6;18;18;9;8;4;4	cg01083340
cg01085287	cg01085287	-0.0496864	0.0086327	-5.7556	8.63355e-09	0.00056211	cg01085287_BC21	37798383	CTACAACCCTCTACRTAATCCTAAATTATCAATAAATCTCAACTAAATCC						cg	R	B	C	2	II	17	79326329	Human	GRCh38	TGCAGCCCTCTGCGTGATCCTGGGTTGTCAGTAAATCTCAACTAGATCCG	CTCTTGCAACTGGTTGAGAAGCTAGGAGGCGCCAGGATGTCCCTCCCTTCTCGCCCTGCA[CG]GATCTAGTTGAGATTTACTGACAACCCAGGATCACGCAGAGGGCTGCAGTGAAAATATCT	CTCTTGCAACTGGTTGAGAAGCTAGGAGGCGCCAGGATGTCCCTCCCTTCTCGCCCTGCA[CG]GATCTAGTTGAGATTTACTGACAACCCAGGATCACGCAGAGGGCTGCAGTGAAAATATCT	1													FALSE		EH38D5046754	EH38E3247742|CTCF-only/CTCF-bound;EH38E3247742|Low-DNase	1;86	Quies;TxWk;ReprPCWk;ReprPC;EnhA2;Het	587;98;825;144;6;3
cg01086978	cg01086978	-0.0209809	0.00390194	-5.37704	7.57211e-08	0.00197318	cg01086978_TC21	12603903	ATAAACAACAACTCATCTTCTACTTCATCACAAAAAATAATATCCAATCC						cg	F	T	C	2	II	8	67342853	Human	GRCh38	CGGACTGGATACCACCCTTTGTGATGAAGCAGAAGATGAGCTGTTGTTTA	TTTCCAAGCTAATAAACAACAGCTCATCTTCTGCTTCATCACAAAGGGTGGTATCCAGTC[CG]CACCTCACGGACCACCAACAAAATCCTCTCACTCTCAAGTCGATCCCTCGAACCCAGGTG	TTTCCAAGCTAATAAACAACAGCTCATCTTCTGCTTCATCACAAAGGGTGGTATCCAGTC[CG]CACCTCACGGACCACCAACAAAATCCTCTCACTCTCAAGTCGATCCCTCGAACCCAGGTG	1	TSS1500;TSS1500	ARFGEF1-DT;ARFGEF1-DT	NR_136223.1;NR_136224.1	chr8:67342894-67343815	N_Shore	TSS1500	ENSG00000271966.1	ENST00000607397.1					FALSE		EH38D5957635	EH38E3838330|Low-DNase;EH38E3838330|pELS	83;4	TssFlnkU;TssFlnk;TssA;EnhWk;TssFlnkD;TxWk;EnhA2;EnhA1;ReprPC	483;166;857;15;109;13;14;5;1	cg01086978	cg01086978
cg01091099	cg01091099	-0.0289821	0.00666208	-4.35031	1.35947e-05	0.0451991	cg01091099_BC21	47681543	TTCTAACTAACTAAAATAACTAAAACACAAACTAATTTTAAAATCCCCCC						cg	R	B	C	2	II	2	54588543	Human	GRCh38	TCTAACTAACTGAGGTGGCTGAGGCACAGACTGGTTTTGGGATCCCCCCG	GTAGGGTTCAGATAAATGTGGGCTCTAATTCTGGGTGTTTATTTGCTAGCAGCATGCCCT[CG]GGGGGATCCCAAAACCAGTCTGTGCCTCAGCCACCTCAGTTAGTTAGAAATCACAGGCTG	GTAGGGTTCAGATAAATGTGGGCTCTAATTCTGGGTGTTTATTTGCTAGCAGCATGCCCT[CG]GGGGGATCCCAAAACCAGTCTGTGCCTCAGCCACCTCAGTTAGTTAGAAATCACAGGCTG	1													FALSE					Quies;ReprPCWk;EnhWk;TssFlnkU;EnhA1;EnhA2;TxWk;EnhG1;EnhG2;Tx;ReprPC;TssFlnkD	765;49;330;7;212;121;171;2;2;1;2;1	cg01091099
cg01094172	cg01094172	-0.0123803	0.00254899	-4.85693	1.19222e-06	0.0100041	cg01094172_TC21	66715930	TATAAAAACCACAATAAACTCTATTTCCCATCTACCTACTTATTACCCTC						cg	R	T	C	2	II	1	161186174	Human	GRCh38	CGAGGGCAATAAGTAGGCAGATGGGAAACAGAGCTCACTGTGGCTCTTAC	TACTTCCTGTTATTACTGTTTCTGTTCCTCCTTATATATCTACACCCCAGCTCAGGCCCA[CG]AGGGCAATAAGTAGGCAGATGGGAAACAGAGCTCACTGTGGCTCTTACAGGGAGATATGT	ACATATCTCCCTGTAAGAGCCACAGTGAGCTCTGTTTCCCATCTGCCTACTTATTGCCCT[CG]TGGGCCTGAGCTGGGGTGTAGATATATAAGGAGGAACAGAAACAGTAATAACAGGAAGTA	1	3UTR;exon_9	ADAMTS4;ADAMTS4	NM_005099.6;NM_005099.6			exon_9;3UTR	ADAMTS4;ADAMTS4	ENST00000367996.6;ENST00000367996.6	chr1:161186118-161186181		1:161155053-161156101	Unclassified	TRUE		EH38D4429475	EH38E2843627|dELS;EH38E2843627|DNase-only;EH38E2843627|Low-DNase	9;1;77	TxWk;EnhA1;Quies;TssFlnkU;EnhA2;EnhWk;TssFlnk;TssA;ReprPCWk;EnhG1	561;330;191;55;308;57;119;39;2;1
cg01109135	cg01109135	-0.0244421	0.00493632	-4.95148	7.36519e-07	0.00761915	cg01109135_TC21	44657158	ACAATAACTATACCRAACCTTCCAAAACATACAAATACCATCCTAATCCC						cg	R	T	C	2	II	14	105065915	Human	GRCh38	CGGGACCAGGATGGCACCTGCATGTCCTGGAAGGCTCGGCACAGCCACTG	CCCAGGAGTCCCTGTCCGGGGTGCCAGGAGTAGAGAGGCTGAGTGCGCCCACTGCAGCCC[CG]GGACCAGGATGGCACCTGCATGTCCTGGAAGGCTCGGCACAGCCACTGCACACAAGCACC	GGTGCTTGTGTGCAGTGGCTGTGCCGAGCCTTCCAGGACATGCAGGTGCCATCCTGGTCC[CG]GGGCTGCAGTGGGCGCACTCAGCCTCTCTACTCCTGGCACCCCGGACAGGGACTCCTGGG	1	TSS1500;TSS1500;TSS1500;TSS1500	GPR132;GPR132;GPR132;GPR132	NM_001278694.2;NM_013345.4;NM_001278695.2;NM_001278696.2			TSS1500;TSS1500;TSS1500;TSS1500	ENSG00000183484.12;ENSG00000183484.12;ENSG00000183484.12;ENSG00000183484.12	ENST00000329797.8;ENST00000392585.2;ENST00000539291.6;ENST00000546679.1			14:105531503-105533362	Promoter_Associated	TRUE		EH38D2765351	EH38E1746434|DNase-H3K4me3;EH38E1746434|DNase-only;EH38E1746434|Low-DNase;EH38E1746434|pELS;EH38E1746434|pELS/CTCF-bound	1;1;73;11;1	Quies;ReprPCWk;TssFlnkU;EnhA2;EnhA1;TxWk;EnhWk;ReprPC;TssA;Het;EnhBiv;TssFlnk;TssFlnkD;EnhG1	453;457;179;135;49;129;47;131;59;2;10;9;2;1	cg01109135
cg01114230	cg01114230	-0.0341179	0.00696907	-4.89561	9.79998e-07	0.00902569	cg01114230_TC21	68705955	AAATAATTCAAACAAAATTCAAATCCAATCTACCTAATTTCAAAACCCAC						cg	F	T	C	2	II	12	13044105	Human	GRCh38	CGTGGGCTTTGAAATCAGGCAGACTGGATTTGAATCCTGCCTGAATCACT	GCCCAGCTAGTAAGTGATTCAGGCAGGATTCAAATCCAGTCTGCCTGATTTCAAAGCCCA[CG]CACATTGCACAATCCACACCTCCTTAAATATCTCCTTCGAATCATTTTCACTGCAAGCTT	GCCCAGCTAGTAAGTGATTCAGGCAGGATTCAAATCCAGTCTGCCTGATTTCAAAGCCCA[CG]CACATTGCACAATCCACACCTCCTTAAATATCTCCTTCGAATCATTTTCACTGCAAGCTT	1	TSS1500	FAM234B	NM_020853.2	chr12:13044304-13044847	N_Shore	TSS1500;TSS1500	ENSG00000084444.14;ENSG00000084444.14	ENST00000197268.13;ENST00000416494.6			12:13196627-13198074	Promoter_Associated_Cell_type_specific	TRUE		EH38D4673286	EH38E3004324|DNase-H3K4me3;EH38E3004324|Low-DNase;EH38E3004324|pELS	13;67;7	TssBiv;TssFlnkD;TssA;TssFlnk;EnhBiv;TssFlnkU;ReprPCWk;EnhA2;ReprPC;EnhWk;EnhA1;Quies	440;331;216;270;10;374;6;3;5;5;1;2
cg01116541	cg01116541	-0.0500625	0.0108125	-4.63005	3.65573e-06	0.0204603	cg01116541_BC21	50638978	TTTCAAAAACAACCTCTTTTTAACTTTCACCAACTTCTCCAATTTTCTCC						cg	F	B	C	2	II	7	140249072	Human	GRCh38	TTCAGAAGCAGCCTCTTTTTAGCTTTCACCAGCTTCTCCAGTTTTCTCCG	CCCCCCTTGATTTTCAGAAGCAGCCTCTTTTTAGCTTTCACCAGCTTCTCCAGTTTTCTC[CG]TTGCATTTATTATCTGTTGTCTTCCTTCTTTGGGAAACAAGGATTTAGCTATCATATATC	GATATATGATAGCTAAATCCTTGTTTCCCAAAGAAGGAAGACAACAGATAATAAATGCAA[CG]GAGAAAACTGGAGAAGCTGGTGAAAGCTAAAAAGAGGCTGCTTCTGAAAATCAAGGGGGG	1													FALSE					Quies;ReprPC;TxWk;ReprPCWk;EnhWk;EnhA2;TssFlnkD;EnhA1;Tx;TssA	1083;3;379;120;53;7;3;10;4;1
cg01120874	cg01120874	-0.0384567	0.00727582	-5.28555	1.25328e-07	0.00271632	cg01120874_TC21	29761853	ACCCAAAACTAACACAAAAAACAACCTATCTACATACTAAATCACCAAAC						cg	F	T	C	2	II	9	130936429	Human	GRCh38	CGTTTGGTGACCCAGCATGTAGACAGGCTGTTCCCTGTGCCAGCTCTGGG	GCTTCAAACAAGCCCAGAGCTGGCACAGGGAACAGCCTGTCTACATGCTGGGTCACCAAA[CG]GGCGGGGAGGGGAAGCGGGTGCTTGCTATTGGCCCAGGCTCTTGGAGCAACAGCCCTCGA	GCTTCAAACAAGCCCAGAGCTGGCACAGGGAACAGCCTGTCTACATGCTGGGTCACCAAA[CG]GGCGGGGAGGGGAAGCGGGTGCTTGCTATTGGCCCAGGCTCTTGGAGCAACAGCCCTCGA	1				chr9:130938244-130940394	N_Shore	TSS200	ENSG00000130720.13	ENST00000372337.6			9:133811244-133812422	Unclassified	TRUE		EH38D6073167	EH38E3913662|DNase-only;EH38E3913662|Low-DNase;EH38E3913662|pELS;EH38E3913662|PLS	18;52;16;1	Tx;EnhG1;ReprPC;TxWk;EnhA1;ReprPCWk;EnhBiv;Quies;EnhA2;EnhWk;EnhG2	433;24;315;364;135;61;239;18;13;60;1	cg01120874
cg01128614	cg01128614	-0.0450196	0.0102075	-4.41044	1.03162e-05	0.0382596	cg01128614_BC21	60792871	ATCRTATCRAACCTAAAACTTACAAAACATAACTTTCRATTAACACTACC						cg	R	B	C	2	II	8	30155507	Human	GRCh38	TCGTATCGAACCTAAAACTTACAGAACATGACTTTCGATTAACACTGCCG	TCTGGCTTGAGCAGCTAGGCAAATGGTGTGGATCAAAAAAGCAGCAGGTTGCAGGGAGGA[CG]GCAGTGTTAATCGAAAGTCATGTTCTGTAAGTTTTAGGTTCGATACGACTCTGAGCGGAG	TCTGGCTTGAGCAGCTAGGCAAATGGTGTGGATCAAAAAAGCAGCAGGTTGCAGGGAGGA[CG]GCAGTGTTAATCGAAAGTCATGTTCTGTAAGTTTTAGGTTCGATACGACTCTGAGCGGAG	1	TSS1500	DCTN6	NM_006571.4	chr8:30156184-30156844	N_Shore	TSS1500;TSS1500;TSS1500;TSS1500;TSS1500;TSS1500	ENSG00000104671.8;ENSG00000104671.8;ENSG00000104671.8;ENSG00000104671.8;ENSG00000104671.8;ENSG00000104671.8	ENST00000522141.5;ENST00000522540.5;ENST00000520829.5;ENST00000221114.8;ENST00000523666.5;ENST00000519830.1			8:30012707-30014568	Promoter_Associated	TRUE		EH38D5938910	EH38E3826601|Low-DNase;EH38E3826601|pELS;EH38E3826601|pELS/CTCF-bound	74;11;2	Quies;TssFlnkU;TssFlnk;TssA;ReprPCWk;TssFlnkD;EnhA2;ReprPC;TxWk;EnhWk;TssBiv	807;530;69;194;17;33;5;3;3;1;1
cg01132064	cg01132064	-0.0251309	0.0057637	-4.36021	1.29939e-05	0.0440659	cg01132064_BC21	5761480	CACTACTATCCCACTAAATAAATAAAACAACTCRAAACTTATAAAAACCC						cg	R	B	C	2	II	11	46361012	Human	GRCh38	ACTACTGTCCCACTGAATAGATGGGGCAACTCGAGGCTTGTGGAAGCCCG	GAGCCAGAAGACCCAGAAGCTGGAGTCCCAGCTCAACCAAATCGGAGTTGTGGGCAGTCA[CG]GGCTTCCACAAGCCTCGAGTTGCCCCATCTATTCAGTGGGACAGTAGTGCTGTCTGCACA	GAGCCAGAAGACCCAGAAGCTGGAGTCCCAGCTCAACCAAATCGGAGTTGTGGGCAGTCA[CG]GGCTTCCACAAGCCTCGAGTTGCCCCATCTATTCAGTGGGACAGTAGTGCTGTCTGCACA	1	TSS1500	DGKZ	NM_001105540.2			TSS1500;TSS1500;TSS1500	ENSG00000149091.15;ENSG00000149091.15;ENSG00000149091.15	ENST00000525434.5;ENST00000454345.6;ENST00000534215.5			11:46382382-46383406	Promoter_Associated	TRUE		EH38D4602162	EH38E2956779|Low-DNase;EH38E2956779|pELS	77;10	EnhA1;EnhWk;TssFlnkU;TxWk;EnhA2;ReprPCWk;TssA;EnhBiv;Quies;ReprPC;TssFlnk;EnhG1	966;239;152;116;70;22;8;30;57;1;1;1	cg01132064
cg01133446	cg01133446	-0.0305953	0.0069065	-4.42993	9.42617e-06	0.0364099	cg01133446_BC21	87610346	AAACTCAAAAAAATAACCTAACTTCCCAAAATCTCCTAACAATATAACCC						cg	R	B	C	2	II	1	203127149	Human	GRCh38	GGCTCAGGGAAGTGACCTAGCTTCCCAGGATCTCCTGGCAGTGTAACCCG	CCTTATGGCTTAGCGCTGTGCTATGAAGAGGAAGAAGGAGGAAGGAAAAGGAGCGCAGAG[CG]GGTTACACTGCCAGGAGATCCTGGGAAGCTAGGTCACTTCCCTGAGCCTCAGCATCCTTA	CCTTATGGCTTAGCGCTGTGCTATGAAGAGGAAGAAGGAGGAAGGAAAAGGAGCGCAGAG[CG]GGTTACACTGCCAGGAGATCCTGGGAAGCTAGGTCACTTCCCTGAGCCTCAGCATCCTTA	1	TSS1500;TSS1500;TSS1500;TSS1500	ADORA1;ADORA1;ADORA1;ADORA1	NM_001048230.2;NM_001365065.1;NM_001365066.1;NM_000674.3	chr1:203128105-203128368	N_Shore	exon_1;5UTR;TSS1500;TSS1500;TSS1500;TSS1500	ADORA1;ADORA1;ENSG00000163485.17;ENSG00000163485.17;ENSG00000163485.17;ENSG00000163485.17	ENST00000367236.8;ENST00000367236.8;ENST00000640524.1;ENST00000337894.9;ENST00000367235.1;ENST00000618295.1					FALSE		EH38D2263928	EH38E1413215|Low-DNase;EH38E1413215|PLS	86;1	ZNF/Rpts;ReprPCWk;EnhBiv;Quies;Het;ReprPC;EnhWk;TxWk;TssFlnkU;Tx;EnhA1;TssBiv;EnhA2;TssFlnkD;TssFlnk;TssA;EnhG1	65;264;466;346;85;188;53;94;13;3;15;39;12;10;6;1;3	cg01133446
cg01142338	cg01142338	-0.0367861	0.00838832	-4.38539	1.15778e-05	0.0410619	cg01142338_TC21	97759233	CCAAATTACTATCAAACACCTAATAAAAAACRTAACCRACTATTTTTCTC						cg	R	T	C	2	II	19	45076740	Human	GRCh38	CGAGAAAAATAGTCGGTCACGTTTCTTATTAGGTGCCTGATAGTAATCTG	CCTGATCCCGTTTTAGGGCGGGTGAAACTGAGACACGGCATGCCCACACGCACCCCCAAG[CG]AGAAAAATAGTCGGTCACGTTTCTTATTAGGTGCCTGATAGTAATCTGGGCTATTTCATT	AATGAAATAGCCCAGATTACTATCAGGCACCTAATAAGAAACGTGACCGACTATTTTTCT[CG]CTTGGGGGTGCGTGTGGGCATGCCGTGTCTCAGTTTCACCCGCCCTAAAACGGGATCAGG	1	TSS1500	ZNF296	NM_145288.3	chr19:45076063-45076760;chr19:45079079-45079678	Island;N_Shelf	exon_2;TSS1500	GEMIN7-AS1;ENSG00000170684.10	ENST00000586744.1;ENST00000303809.7			19:45578467-45580515	Promoter_Associated	TRUE					Quies;EnhWk;TssFlnkU;ReprPCWk;TssA;TssBiv;TssFlnk;TssFlnkD;EnhA1;TxWk;ReprPC;EnhA2;Het;EnhBiv	667;66;459;83;107;100;57;70;13;19;5;11;5;1
cg01152906	cg01152906	-0.0152669	0.00328195	-4.65179	3.29071e-06	0.0192163	cg01152906_TC21	71797923	CTCCRCTCTAAATTATATCTAAATCTCTCTCATTATCTCCTATTTACTAC						cg	F	T	C	2	II	10	7819189	Human	GRCh38	CGCAGCAAACAGGAGACAATGAGAGAGATCCAGACACAATTCAGAGCGGA	TCCTACCGCTCCTCCGCTCTGAATTGTGTCTGGATCTCTCTCATTGTCTCCTGTTTGCTG[CG]GGTAGATCCACCCCCAGCGTGCCCTACACCCTCTTTTACCTCGGTCCTTTTTCTCCCTTG	TCCTACCGCTCCTCCGCTCTGAATTGTGTCTGGATCTCTCTCATTGTCTCCTGTTTGCTG[CG]GGTAGATCCACCCCCAGCGTGCCCTACACCCTCTTTTACCTCGGTCCTTTTTCTCCCTTG	1				chr10:7818298-7819144	S_Shore						10:7859896-7861532	Promoter_Associated	TRUE		EH38D4489732	EH38E2884705|DNase-H3K4me3;EH38E2884705|DNase-H3K4me3/CTCF-bound;EH38E2884705|Low-DNase;EH38E2884705|pELS;EH38E2884705|pELS/CTCF-bound	4;18;30;6;29	TxWk;TssA;TssFlnk;Tx;TssFlnkU;TssFlnkD;Quies;TssBiv	692;462;254;134;104;12;4;1	cg01152906
cg01158559	cg01158559	-0.0200055	0.00454155	-4.40499	1.05789e-05	0.038935	cg01158559_BC11	22679304	TTACCTTTACACCAACCACCCTACCTTTAAAAACCCTTTCTTACAAACCA	64731863	TTACCTTTACACCAACCGCCCTACCTTTAAAAACCCTTTCTTACAAACCG	C	Grn	G	cg	R	B	C	1	I	1	247294802	Human	GRCh38	TTACCTTTGCACCAGCCGCCCTGCCTTTAAAAACCCTTTCTTGCAAGCCG	TTTGCAGGATGCCAAGCAAGGAGAATAAGGCAGCTCACACTTAATATCTGACCTCCACAG[CG]GCTTGCAAGAAAGGGTTTTTAAAGGCAGGGCGGCTGGTGCAAAGGTAATGAGTTATCACG	TTTGCAGGATGCCAAGCAAGGAGAATAAGGCAGCTCACACTTAATATCTGACCTCCACAG[CG]GCTTGCAAGAAAGGGTTTTTAAAGGCAGGGCGGCTGGTGCAAAGGTAATGAGTTATCACG	1						TSS200	ENSG00000202079.1	ENST00000365209.1					FALSE					ZNF/Rpts;Quies;ReprPCWk;EnhA1;EnhA2;TxWk;EnhWk;Het;Tx;TssFlnkD;ReprPC;EnhG1;TssFlnkU	721;641;12;33;12;98;80;33;25;4;2;1;1
cg01165575	cg01165575	-0.0146413	0.00281203	-5.20665	1.92281e-07	0.00348279	cg01165575_TC21	37631122	ACAAAAACCTATATTTAAAAAAACCTAAAACCCCTAACATTCACACTATC						cg	R	T	C	2	II	16	30064583	Human	GRCh38	CGATAGTGTGAATGTCAGGGGCTTCAGGTTTCCCTAAATATAGGTCCCTG	CCCTCCCCATCAATAGGGCCGACCCAAGTCTTCCTCCCCCTTCCCCCATGCCGGGCCCCA[CG]ATAGTGTGAATGTCAGGGGCTTCAGGTTTCCCTAAATATAGGTCCCTGCCAGAGGATCCG	CGGATCCTCTGGCAGGGACCTATATTTAGGGAAACCTGAAGCCCCTGACATTCACACTAT[CG]TGGGGCCCGGCATGGGGGAAGGGGGAGGAAGACTTGGGTCGGCCCTATTGATGGGGAGGG	1	5UTR;exon_1;TSS1500;TSS1500	ALDOA;ALDOA;ALDOA;ALDOA	NM_001127617.2;NM_001127617.2;NM_184041.5;NM_001243177.4	chr16:30064989-30066551	N_Shore	exon_2;exon_1;exon_1;5UTR;TSS200;TSS1500;TSS1500;TSS1500;TSS1500;TSS1500;TSS1500;TSS1500	ALDOA;ALDOA;ENSG00000274904;ALDOA;ENSG00000149925.22;ENSG00000149925.22;ENSG00000149925.22;ENSG00000149925.22;ENSG00000149925.22;ENSG00000149925.22;ENSG00000149925.22;ENSG00000149925.22	ENST00000562302.1;ENST00000412304.6;ENST00000617969.1;ENST00000412304.6;ENST00000563987.5;ENST00000642816.3;ENST00000643777.4;ENST00000567555.1;ENST00000569798.5;ENST00000395240.7;ENST00000566012.1;ENST00000566846.5					FALSE		EH38D4939094	EH38E3176560|Low-DNase;EH38E3176560|PLS;EH38E3176560|PLS/CTCF-bound	26;58;3	TssA;TssFlnkD;TssFlnkU;TssFlnk;EnhA1;EnhA2	840;51;579;187;5;1	cg01165575
cg01166488	cg01166488	-0.0334584	0.00747061	-4.47867	7.51108e-06	0.0318242	cg01166488_TC21	60798534	TTCCTTACCAACTTCAAAACCTCAACRCCTTTAAACTAAAAATACCAACC						cg	R	T	C	2	II	5	135834458	Human	GRCh38	CGGCTGGCACTTTCAGTTCAAAGGCGCTGAGGCTCTGAAGTTGGCAAGGA	ATCAGCATTGTCAGCACAGCACAGTACAGGGAGATACGCGCATTGCCGTCTCTGGATGGG[CG]GCTGGCACTTTCAGTTCAAAGGCGCTGAGGCTCTGAAGTTGGCAAGGAAGAGGATAACCC	GGGTTATCCTCTTCCTTGCCAACTTCAGAGCCTCAGCGCCTTTGAACTGAAAGTGCCAGC[CG]CCCATCCAGAGACGGCAATGCGCGTATCTCCCTGTACTGTGCTGTGCTGACAATGCTGAT	1	TSS1500;TSS1500;TSS1500	SLC25A48;SLC25A48;SLC25A48	NM_145282.5;NM_001349336.2;NR_146141.2	chr5:135834582-135835467	N_Shore	TSS200;TSS1500;TSS1500;TSS1500;TSS1500;TSS1500;TSS1500;TSS1500	ENSG00000145832.16;ENSG00000145832.16;ENSG00000145832.16;ENSG00000145832.16;ENSG00000145832.16;ENSG00000145832.16;ENSG00000145832.16;ENSG00000145832.16	ENST00000425402.5;ENST00000681962.1;ENST00000650267.1;ENST00000510147.2;ENST00000274513.9;ENST00000433282.6;ENST00000412661.3;ENST00000462340.1			5:135169354-135171303	Unclassified_Cell_type_specific	TRUE					Quies;EnhBiv;Het;ReprPCWk;ReprPC;TssBiv;TssFlnkD;TssFlnk;ZNF/Rpts;TssFlnkU;EnhWk;TxWk	803;276;42;40;231;211;13;24;7;6;9;1	cg01166488
cg01175020	cg01175020	-0.0534204	0.0118079	-4.52411	6.06497e-06	0.0278618	cg01175020_TC11	61640257	AAACCTCCTACTACAACTACAAAAAAATACAATTCACTTACTACCTCTCA	15661188	AAACCTCCTACTACAACTACAAAAAAATACGATTCGCTTACTACCTCTCG	A	Red	R	cg	R	T	C	1	I	10	101136718	Human	GRCh38	CGAGAGGCAGCAAGCGAACCGCATCCTCCTGCAGTTGCAGCAGGAGGCCT	CTCCTGGCAGGTAACGGCTTGTTCCCGGTGCAGACGGCAGACTGCGGAGGAACGGGAGGC[CG]AGAGGCAGCAAGCGAACCGCATCCTCCTGCAGTTGCAGCAGGAGGCCTTCCAGAAGAGCC	GGCTCTTCTGGAAGGCCTCCTGCTGCAACTGCAGGAGGATGCGGTTCGCTTGCTGCCTCT[CG]GCCTCCCGTTCCTCCGCAGTCTGCCGTCTGCACCGGGAACAAGCCGTTACCTGCCAGGAG	1	exon_3;3UTR;exon_3	TLX1;TLX1;TLX1	NM_001195517.2;NM_001195517.2;NM_005521.4	chr10:101133903-101135302;chr10:101136585-101136908;chr10:101139420-101139732;chr10:101140065-101140506	S_Shore;Island;N_Shelf;N_Shelf	exon_3;exon_3;3UTR	TLX1;TLX1;TLX1	ENST00000370196.11;ENST00000467928.2;ENST00000467928.2		10:101135948-101136913			FALSE	DMR	EH38D4545078			Quies;ReprPCWk;ReprPC;TssBiv;TxWk;EnhBiv;EnhG2;TssA;Tx;Het	726;115;754;5;29;30;1;1;1;1	cg01175020
cg01185278	cg01185278	-0.0438848	0.00866303	-5.06576	4.06771e-07	0.00547357	cg01185278_BC21	36646966	ACAAATCAAACAACTAAACCAAATAATACCCAAATCATCTAAAAACRCAC						cg	F	B	C	2	II	5	132012286	Human	GRCh38	CAAATCAGGCAGCTAGACCAGATAGTGCCCAGATCATCTGGGGACGCACG	CCTAGGCTCTGACAAATCAGGCAGCTAGACCAGATAGTGCCCAGATCATCTGGGGACGCA[CG]AGTTCAGGTCTGAGGCTACGCAAGGTCACAGGAGACTCAGTGTGATCACAGGCTGCCATA	TATGGCAGCCTGTGATCACACTGAGTCTCCTGTGACCTTGCGTAGCCTCAGACCTGAACT[CG]TGCGTCCCCAGATGATCTGGGCACTATCTGGTCTAGCTGCCTGATTTGTCAGAGCCTAGG	1	TSS1500;TSS1500;TSS1500;TSS1500;TSS1500;TSS1500	ACSL6;ACSL6;ACSL6;ACSL6;ACSL6;ACSL6	NM_001009185.3;NM_015256.4;NM_001205247.2;NM_001205248.2;NM_001205251.2;NM_001205250.1	chr5:132011199-132012083	S_Shore	TSS1500;TSS1500;TSS1500;TSS1500;TSS1500;TSS1500;TSS200;TSS1500;TSS1500;TSS1500;TSS1500;TSS1500;TSS1500;TSS1500;TSS1500;TSS1500;TSS200;TSS200;TSS200;TSS1500	ENSG00000281938.2;ENSG00000164398.15;ENSG00000164398.15;ENSG00000164398.15;ENSG00000164398.15;ENSG00000164398.15;ENSG00000164398.15;ENSG00000164398.15;ENSG00000164398.15;ENSG00000164398.15;ENSG00000164398.15;ENSG00000164398.15;ENSG00000164398.15;ENSG00000164398.15;ENSG00000164398.15;ENSG00000164398.15;ENSG00000164398.15;ENSG00000164398.15;ENSG00000164398.15;ENSG00000164398.15	ENST00000652469.1;ENST00000651356.1;ENST00000651883.2;ENST00000357096.5;ENST00000652493.1;ENST00000379255.5;ENST00000379246.5;ENST00000379246.5;ENST00000651269.1;ENST00000651086.1;ENST00000651250.1;ENST00000650697.1;ENST00000652424.1;ENST00000296869.9;ENST00000434099.6;ENST00000430403.5;ENST00000414078.5;ENST00000441995.2;ENST00000477640.1;ENST00000469164.1					FALSE					Quies;TxWk;ReprPC;TssFlnkD;TssBiv;EnhBiv;TssFlnkU;EnhWk;TssFlnk;ReprPCWk;EnhA2;EnhA1;ZNF/Rpts	518;275;179;36;438;78;7;25;47;22;35;2;1	cg01185278
cg01206333	cg01206333	-0.0296735	0.00629363	-4.71485	2.41894e-06	0.0157863	cg01206333_BC21	65699886	TTCTTATAAATATTTAATCTATACCAAATATCRTCCRCAACRTTTTACAC						cg	F	B	C	2	II	19	48513277	Human	GRCh38	TCTTATGAGTATTTAGTCTGTGCCAGGTATCGTCCGCAGCGTTTTACACG	TAATGTATTTATTCTTATGAGTATTTAGTCTGTGCCAGGTATCGTCCGCAGCGTTTTACA[CG]TACAGAATTACCTCTCAATCCTCACAACCGCCCTCTGAGACAGGTATTTTTTAATCATGC	GCATGATTAAAAAATACCTGTCTCAGAGGGCGGTTGTGAGGATTGAGAGGTAATTCTGTA[CG]TGTAAAACGCTGCGGACGATACCTGGCACAGACTAAATACTCATAAGAATAAATACATTA	1	TSS200;TSS1500	LMTK3;LMTK3	NM_001080434.2;NM_001388485.1	chr19:48511354-48511565;chr19:48513480-48513950	S_Shore;N_Shore	exon_1;3UTR;TSS200;TSS1500;TSS1500	LMTK3;LMTK3;ENSG00000142235.13;ENSG00000142235.13;ENSG00000142235.13	ENST00000598924.1;ENST00000598924.1;ENST00000673139.1;ENST00000600059.6;ENST00000647709.2		19:48513045-48513572			FALSE		EH38D5143279	EH38E3312334|Low-DNase;EH38E3312334|PLS	83;4	Quies;ReprPCWk;ReprPC;ZNF/Rpts;Het;TssFlnkU;TssBiv;TssA;EnhWk;TxWk;TssFlnk;EnhA2;TssFlnkD;EnhBiv;EnhA1	511;165;384;58;124;27;255;13;15;23;32;7;19;25;5
cg01215339	cg01215339	-0.0318267	0.00556011	-5.72411	1.03978e-08	0.000635347	cg01215339_BC21	49789849	AATAAAACTAACTACRAAAACATAACCCTACCCTAAAACCTAACTCTACC						cg	R	B	C	2	II	22	50245625	Human	GRCh38	GTGAGGCTGACTGCGGAGGCATGGCCCTGCCCTGGGGCCTGGCTCTGCCG	CCTCCGGCGCTGGAGCTGGTTCAGGGCACTCCCCTGCCCTGCCCTCCCCACCGATCTGTG[CG]GCAGAGCCAGGCCCCAGGGCAGGGCCATGCCTCCGCAGTCAGCCTCACCTGCAACATCTT	CCTCCGGCGCTGGAGCTGGTTCAGGGCACTCCCCTGCCCTGCCCTCCCCACCGATCTGTG[CG]GCAGAGCCAGGCCCCAGGGCAGGGCCATGCCTCCGCAGTCAGCCTCACCTGCAACATCTT	1	TSS1500	TUBGCP6	NM_020461.4	chr22:50244758-50245465	S_Shore	exon_1;TSS1500;TSS1500;TSS1500	ENSG00000288871;ENSG00000128159.12;ENSG00000128159.12;ENSG00000128159.12	ENST00000685176.2;ENST00000439308.6;ENST00000498611.5;ENST00000248846.10			22:50682482-50684253	Promoter_Associated	TRUE		EH38D5418697	EH38E3491002|Low-DNase;EH38E3491002|pELS	64;23	ReprPC;ReprPCWk;TssFlnkU;EnhWk;EnhG2;TssA;TssFlnk;Quies;TxWk;EnhA1;EnhA2;EnhBiv;TssFlnkD;TssBiv	348;313;648;50;67;79;23;18;46;10;3;47;10;1	cg01215339
cg01215773	cg01215773	-0.0782283	0.0169908	-4.60416	4.14129e-06	0.0220622	cg01215773_BC21	3719537	ATACTATAAAATATCCCAAATATCCAAAACAATACCTAACACATATAAAC						cg	R	B	C	2	II	10	24520359	Human	GRCh38	TGCTGTGGGGTATCCCAAGTGTCCAGAACAATGCCTGGCACATGTAGACG	TGCGGTGTTTAAAAATCTGCCACATAGAGGATTCATTCATGTATGCAAGTATTTATTAAA[CG]TCTACATGTGCCAGGCATTGTTCTGGACACTTGGGATACCCCACAGCACAAAGTAGGTGC	TGCGGTGTTTAAAAATCTGCCACATAGAGGATTCATTCATGTATGCAAGTATTTATTAAA[CG]TCTACATGTGCCAGGCATTGTTCTGGACACTTGGGATACCCCACAGCACAAAGTAGGTGC	1											10:24808926-24809431	Unclassified	TRUE					Quies;TxWk;TssFlnk;Tx;ReprPC;EnhWk;EnhA2;ReprPCWk;EnhG1;TssFlnkD;EnhBiv;TssBiv;Het	1020;462;7;79;19;22;2;35;5;8;2;1;1
cg01216369	cg01216369	0.0110843	0.00237567	4.66577	3.07469e-06	0.018378	cg01216369_BC11	16780261	ACTTATAAACACAATAAACCTCATAACACAAAACATTTCAAATCCTAACA	49805114	ACTTATAAACGCGATAAACCTCGTAACACGAAACGTTTCAAATCCTAACG	T	Red	R	cg	R	B	C	1	I	3	173141232	Human	GRCh38	ACTTGTGGGCGCGATGGGCCTCGTGGCACGGGACGTTTCAAGTCCTGGCG	CCAACACCGGCTTCCCAACGTCCCACTGCGAGGCCTGATCAGGCTGCTTGCTCGCGGGGA[CG]CCAGGACTTGAAACGTCCCGTGCCACGAGGCCCATCGCGCCCACAAGTGGCGCGGGTCAC	CCAACACCGGCTTCCCAACGTCCCACTGCGAGGCCTGATCAGGCTGCTTGCTCGCGGGGA[CG]CCAGGACTTGAAACGTCCCGTGCCACGAGGCCCATCGCGCCCACAAGTGGCGCGGGTCAC	1	5UTR;exon_1	SPATA16;SPATA16	NM_031955.6;NM_031955.6			exon_1;5UTR	SPATA16;SPATA16	ENST00000351008.4;ENST00000351008.4					FALSE		EH38D5515328			Quies;Het;ReprPCWk;EnhWk;TxWk;ZNF/Rpts;EnhA2	1528;94;27;4;6;3;1	cg01216369	cg01216369
cg01216946	cg01216946	-0.027398	0.00553875	-4.9466	7.55195e-07	0.00770641	cg01216946_BC21	5614566	TCCCTTACCATATACATTTCCRAAAATAAAACCTAAATATCTTTAAAACC						cg	F	B	C	2	II	4	4403671	Human	GRCh38	CCCTTACCATATACATTTCCGGGAGTAGGACCTGGGTGTCTTTAGGGCCG	AATCAGCAAAGTCCCTTACCATATACATTTCCGGGAGTAGGACCTGGGTGTCTTTAGGGC[CG]TTATTCAGCCAACGACAGCCAGTTTGCCTGGGCCCAGTCATGTACATCTGAGCCTCAGTT	AACTGAGGCTCAGATGTACATGACTGGGCCCAGGCAAACTGGCTGTCGTTGGCTGAATAA[CG]GCCCTAAAGACACCCAGGTCCTACTCCCGGAAATGTATATGGTAAGGGACTTTGCTGATT	1													FALSE		EH38D3543156			Quies;ReprPC;ReprPCWk;TxWk;Tx;EnhA2;Het;EnhBiv;EnhWk;EnhG1	934;144;436;108;22;6;8;2;2;1
cg01218206	cg01218206	-0.0821848	0.015977	-5.14394	2.6904e-07	0.00432481	cg01218206_BC21	54733181	TTAAACACCCTCCCCTTTCTCTAAAACTATTAACTTCAATAAATACCCAC						cg	F	B	C	2	II	11	117063261	Human	GRCh38	TAAACACCCTCCCCTTTCTCTAAAACTGTTAGCTTCAATGAGTACCCACG	AGTTATTGGAATTAAACACCCTCCCCTTTCTCTAAAACTGTTAGCTTCAATGAGTACCCA[CG]TCTCAGAAGCTATGACCATAACTACACTGAAACCATAAATTAGTGAGATTGGAATTCCCC	GGGGAATTCCAATCTCACTAATTTATGGTTTCAGTGTAGTTATGGTCATAGCTTCTGAGA[CG]TGGGTACTCATTGAAGCTAACAGTTTTAGAGAAAGGGGAGGGTGTTTAATTCCAATAACT	1											11:116933852-116934163	Unclassified	TRUE		EH38D2501963	EH38E1572975|dELS;EH38E1572975|DNase-only;EH38E1572975|Low-DNase	2;1;84	TxWk;Tx;Quies;EnhWk;EnhA1;EnhA2;EnhG1;TssFlnkU	380;522;578;105;35;16;22;5	cg01218206
cg01245301	cg01245301	-0.0446189	0.00722955	-6.17174	6.75416e-10	0.00013085	cg01245301_BC21	59645282	CTTTAAAACTAAACAAAAATCTTACCAACRCCAAACTTCAAAACTCCTCC						cg	R	B	C	2	II	8	54554321	Human	GRCh38	TTTGAAGCTGGGCAAAAATCTTGCCAACGCCAAGCTTCAGAGCTCCTCCG	CACCTCCCTCCTGTGAGAGGCTGTGAAATGCAGGCAGGAAACAGCCCCTCCCAGGTTAAG[CG]GAGGAGCTCTGAAGCTTGGCGTTGGCAAGATTTTTGCCCAGCTTCAAAGGGATTTGAAGG	CACCTCCCTCCTGTGAGAGGCTGTGAAATGCAGGCAGGAAACAGCCCCTCCCAGGTTAAG[CG]GAGGAGCTCTGAAGCTTGGCGTTGGCAAGATTTTTGCCCAGCTTCAAAGGGATTTGAAGG	1						TSS200;TSS1500	ENSG00000104237.11;ENSG00000104237.11	ENST00000522001.2;ENST00000602362.2					FALSE					Quies;ReprPCWk;Het;TssFlnkD;TssFlnkU;TssFlnk;ReprPC;ZNF/Rpts;EnhWk;EnhA2;EnhA1;TssBiv;EnhBiv;TssA;TxWk	1041;85;220;37;57;78;36;49;26;5;7;8;5;7;2
cg01264106	cg01264106	-0.0522944	0.010698	-4.88823	1.01748e-06	0.00920662	cg01264106_BC21	61637219	CCCTATCCTAACTTACAATTAACTAAACTTTCAAAAAACRAAACTCACCC						cg	F	B	C	2	II	22	37675595	Human	GRCh38	CCTATCCTGACTTGCAATTGGCTGAACTTTCAGGGGGCGGGGCTCACCCG	GTGGCCCCCAGCCCTATCCTGACTTGCAATTGGCTGAACTTTCAGGGGGCGGGGCTCACC[CG]GTCCGGTCCAGTTAAAAGGGTGGGAGCGTCCGGGGGCCCATCTCTCTCGGGTGGAGTCTT	AAGACTCCACCCGAGAGAGATGGGCCCCCGGACGCTCCCACCCTTTTAACTGGACCGGAC[CG]GGTGAGCCCCGCCCCCTGAAAGTTCAGCCAATTGCAAGTCAGGATAGGGCTGGGGGCCAC	1	TSS200	LGALS1	NM_002305.4	chr22:37677030-37677405	N_Shore	TSS200;TSS200;TSS200;TSS200;TSS200;TSS1500;TSS1500	ENSG00000100097.12;ENSG00000100097.12;ENSG00000100097.12;ENSG00000100097.12;ENSG00000100097.12;ENSG00000100097.12;ENSG00000100097.12	ENST00000215909.10;ENST00000464120.1;ENST00000425542.5;ENST00000480207.5;ENST00000454173.1;ENST00000489315.5;ENST00000472321.1			22:38070968-38071698	Unclassified	TRUE		EH38D5400652	EH38E3480220|DNase-only;EH38E3480220|Low-DNase;EH38E3480220|pELS;EH38E3480220|PLS;EH38E3480220|PLS/CTCF-bound	3;6;7;66;5	Quies;ReprPCWk;TssFlnkU;EnhWk;TssA;EnhA1;TssFlnkD;EnhA2;EnhBiv;ReprPC;TssFlnk;TssBiv;TxWk;Het;ZNF/Rpts;EnhG1	457;125;508;163;249;52;12;15;4;14;15;1;42;4;1;1	cg01264106
cg01268763	cg01268763	-0.0944019	0.0143801	-6.56477	5.21115e-11	2.78201e-05	cg01268763_BC11	68727496	ATATAAATAAAAACCTAAAAAACAAAATCCAATATTCCACCAAAAAAACA	65754554	ATATAAATAAAAACCTAAAAAACAAAATCCAATATTCCACCGAAAAAACG	A	Red	R	cg	F	B	C	1	I	14	53151701	Human	GRCh38	ATGTAAATGAGGACCTAAGAGACAGAATCCAGTATTCCACCGAGGGAGCG	AAACACAAAAATATGTAAATGAGGACCTAAGAGACAGAATCCAGTATTCCACCGAGGGAG[CG]GAGCCACTTGCCAGAGCTGCTTCACGCAGTGCTTTCCACCTCTCCGAACACACCCAGTGG	CCACTGGGTGTGTTCGGAGAGGTGGAAAGCACTGCGTGAAGCAGCTCTGGCAAGTGGCTC[CG]CTCCCTCGGTGGAATACTGGATTCTGTCTCTTAGGTCCTCATTTACATATTTTTGTGTTT	1				chr14:53152147-53153520	N_Shore						14:53618077-53619311	Promoter_Associated	TRUE		EH38D2719224	EH38E1714638|DNase-H3K4me3;EH38E1714638|Low-DNase;EH38E1714638|pELS;EH38E1714638|pELS/CTCF-bound	2;82;2;1	Quies;TxWk;TssFlnkU;TssFlnk;TssA;TssFlnkD;EnhWk;TssBiv;EnhA2	510;305;266;206;280;58;21;14;3	cg01268763
cg01270206	cg01270206	-0.080136	0.0160576	-4.99054	6.02114e-07	0.00683922	cg01270206_BC21	89673890	TATACAAATCTAATTTCTCCTACCTAACCTAAATAATCACAATAAATCCC						cg	F	B	C	2	II	20	56624437	Human	GRCh38	GTACAAGTCTGATTTCTCCTGCCTGGCCTGGGTGATCACAGTGGGTCCCG	GAAGCAGCTTCTGTACAAGTCTGATTTCTCCTGCCTGGCCTGGGTGATCACAGTGGGTCC[CG]GGATGTTTAAACTGATGGTAGAGTCAACCATCAGCATTTATTTCTGTGTTTACAGTCTTC	GAAGACTGTAAACACAGAAATAAATGCTGATGGTTGACTCTACCATCAGTTTAAACATCC[CG]GGACCCACTGTGATCACCCAGGCCAGGCAGGAGAAATCAGACTTGTACAGAAGCTGCTTC	1				chr20:56625223-56631733	N_Shore	TSS1500	ENSG00000289199.2	ENST00000691020.2					FALSE					Quies;ReprPCWk;ReprPC;EnhBiv;Het;EnhWk;TxWk;ZNF/Rpts;TssBiv;TssFlnk;TssFlnkD;EnhA2;EnhA1	615;238;642;16;94;8;25;12;8;1;2;1;1	cg01270206
cg01270489	cg01270489	-0.0479938	0.0100556	-4.77287	1.81621e-06	0.0131213	cg01270489_TC21	61756281	AAAACAAAAAATAAACTCCATCCCTTTATCAAACATACATTAAACCAAAC						cg	F	T	C	2	II	19	48169540	Human	GRCh38	CGTCTGGCCTAATGTATGCTTGATAAAGGGATGGAGCTTACCTCTTGTTT	AATAAAAAGTAAAAACAAGAGGTAAGCTCCATCCCTTTATCAAGCATACATTAGGCCAGA[CG]TCTCCCCATTCAGATGATTCTCCATCTTTTACGAGCCCTTTACCTAGACCTGGACCTTAC	AATAAAAAGTAAAAACAAGAGGTAAGCTCCATCCCTTTATCAAGCATACATTAGGCCAGA[CG]TCTCCCCATTCAGATGATTCTCCATCTTTTACGAGCCCTTTACCTAGACCTGGACCTTAC	1	TSS1500	ZSWIM9	NM_199341.4	chr19:48170072-48170878;chr19:48171808-48172095	N_Shore;N_Shelf	TSS1500;TSS1500	ENSG00000185453.13;ENSG00000185453.13	ENST00000614654.2;ENST00000328759.11					FALSE		EH38D3068961	EH38E1959704|DNase-H3K4me3;EH38E1959704|DNase-H3K4me3/CTCF-bound;EH38E1959704|Low-DNase;EH38E1959704|pELS	1;1;84;1	TxWk;TssFlnk;EnhA1;TssFlnkU;TssA;TssFlnkD;EnhA2;Quies;EnhWk;EnhG1;ReprPCWk;Tx	580;213;100;251;169;90;113;73;70;1;1;2
cg01288695	cg01288695	-0.0151004	0.0034763	-4.34381	1.40034e-05	0.0459529	cg01288695_BC21	54748506	ATTCATCTCTAAATAAATAAACATTTAACTTCCTTATCAAACCCCRAAAC						cg	F	B	C	2	II	9	129803887	Human	GRCh38	TTCATCTCTGAATGAATGAACATTTAGCTTCCTTATCAGACCCCGAAGCG	GTCAAGCGATGGTTCATCTCTGAATGAATGAACATTTAGCTTCCTTATCAGACCCCGAAG[CG]TTAAGGACCTCCACATAATCTTGAAAGTGGCATCGTTTGACTGCCTCGGCCCTAGGGTGT	ACACCCTAGGGCCGAGGCAGTCAAACGATGCCACTTTCAAGATTATGTGGAGGTCCTTAA[CG]CTTCGGGGTCTGATAAGGAAGCTAAATGTTCATTCATTCAGAGATGAACCATCGCTTGAC	1				chr9:129803037-129803754	S_Shore	TSS1500	ENSG00000136816.16	ENST00000488169.1			9:132565128-132566224	Promoter_Associated	TRUE		EH38D6071513	EH38E3912457|DNase-H3K4me3;EH38E3912457|Low-DNase;EH38E3912457|pELS	4;73;10	Quies;ReprPCWk;TssA;TssFlnk;TssFlnkU;TssFlnkD;TxWk;Tx;EnhWk;EnhA1	781;8;321;111;354;46;38;2;1;1
cg01300546	cg01300546	-0.0166774	0.00346624	-4.81138	1.49891e-06	0.0115443	cg01300546_TC21	84626868	ATCACTACCTTTTTTTACCTATTTCTATCTAACCTACCTTCCCAACTATC						cg	R	T	C	2	II	3	3800169	Human	GRCh38	CGATAGTTGGGAAGGCAGGCCAGATAGAAACAGGCAAAAAAAGGCAGTGA	TAGTGCCCCGTTTCCCCCCGTCCCCCTTGCCAAAAAAAAAAAAAAAAAGGTGTGGGAGAG[CG]ATAGTTGGGAAGGCAGGCCAGATAGAAACAGGCAAAAAAAGGCAGTGACCGGAGCCGAGC	GCTCGGCTCCGGTCACTGCCTTTTTTTGCCTGTTTCTATCTGGCCTGCCTTCCCAACTAT[CG]CTCTCCCACACCTTTTTTTTTTTTTTTTTGGCAAGGGGGACGGGGGGAAACGGGGCACTA	1				chr3:3798829-3801088	Island	TSS1500;TSS1500	ENSG00000175928.6;ENSG00000144455.14	ENST00000496115.1;ENST00000469888.1			3:3841792-3842140	Unclassified_Cell_type_specific	TRUE	DMR	EH38D5421041	EH38E3492461|DNase-H3K4me3;EH38E3492461|Low-DNase;EH38E3492461|pELS	3;79;5	Quies;Het;TssBiv;TssA;TssFlnkU;ReprPC;TssFlnk;EnhBiv;ReprPCWk;TssFlnkD;ZNF/Rpts;EnhA2;EnhWk;TxWk	795;43;453;151;26;70;56;25;8;29;3;1;2;1	cg01300546
cg01307229	cg01307229	-0.0620726	0.0110551	-5.61482	1.96769e-08	0.000895017	cg01307229_TC21	4795417	AAATACCTAACCTCTAACTCAACCATTCTATTTCTAAAAATTAATTCTAC						cg	F	T	C	2	II	12	131894052	Human	GRCh38	CGCAGAATTAATTCTTAGAAATAGAATGGCTGAGTTAGAGGTTAGGCATT	AACTCAACTTTAAATGCCTAACCTCTAACTCAGCCATTCTATTTCTAAGAATTAATTCTG[CG]CAGTCCCCCGTTTTGGGAACATTTCCCACGCCTGTTCTCCATTCTCCTGTAGAAGGGGAA	AACTCAACTTTAAATGCCTAACCTCTAACTCAGCCATTCTATTTCTAAGAATTAATTCTG[CG]CAGTCCCCCGTTTTGGGAACATTTCCCACGCCTGTTCTCCATTCTCCTGTAGAAGGGGAA	1	TSS1500	ULK1	NM_003565.4	chr12:131894397-131895507;chr12:131896084-131896397	N_Shore;N_Shelf	TSS1500	ENSG00000177169.10	ENST00000321867.6					FALSE		EH38D4746582	EH38E3052417|DNase-H3K4me3;EH38E3052417|DNase-only;EH38E3052417|Low-DNase;EH38E3052417|pELS	10;5;45;27	Quies;ReprPCWk;EnhA2;EnhWk;TssA;EnhA1;TssFlnkU;TxWk;Het;TssFlnkD;TssFlnk;ZNF/Rpts;ReprPC	729;165;307;68;25;93;84;18;96;26;42;7;3
cg01309328	cg01309328	-0.0632081	0.0127599	-4.95366	7.28288e-07	0.00756987	cg01309328_TC21	75785238	AAAACCTATAAAATTTACCTACTAACCTCCTCTCAACAACTCACTATTAC						cg	R	T	C	2	II	6	32843476	Human	GRCh38	CGCAACAGTGAGTTGCTGAGAGGAGGCCAGCAGGCAAATTTCATAGGTTT	GTATCCTCACTTTACAGAAGAGGGGCTTGGGACCTAGACTAAGTGACTTGTTCTAAGTCG[CG]CAACAGTGAGTTGCTGAGAGGAGGCCAGCAGGCAAATTTCATAGGTTTCCCAAGACACCA	TGGTGTCTTGGGAAACCTATGAAATTTGCCTGCTGGCCTCCTCTCAGCAACTCACTGTTG[CG]CGACTTAGAACAAGTCACTTAGTCTAGGTCCCAAGCCCCTCTTCTGTAAAGTGAGGATAC	1	TSS1500;TSS1500;TSS1500;TSS1500	PSMB8-AS1;PSMB8-AS1;PSMB8-AS1;PSMB8-AS1	NR_037176.1_8;NR_037174.1_8;NR_037175.1_8;NR_037173.1_8	chr6:32843717-32844062	N_Shore	exon_1;exon_1;TSS1500;TSS1500;TSS1500;TSS1500;TSS1500;TSS1500;TSS1500;TSS1500;TSS1500	PSMB8;PSMB8;ENSG00000204261.9;ENSG00000204261.9;ENSG00000204261.9;ENSG00000204261.9;ENSG00000204261.9;ENSG00000204261.9;ENSG00000204261.9;ENSG00000240065.8;ENSG00000240065.8	ENST00000650411.1;ENST00000697612.1;ENST00000429600.2;ENST00000453426.2;ENST00000415067.2;ENST00000458296.2;ENST00000666376.1;ENST00000413039.6;ENST00000412095.1;ENST00000395330.5;ENST00000414474.5					FALSE		EH38D3832572	EH38E2460170|DNase-H3K4me3;EH38E2460170|Low-DNase;EH38E2460170|pELS;EH38E2460170|pELS/CTCF-bound	1;75;10;1	ReprPCWk;TssBiv;ReprPC;TssA;TssFlnkU;Quies;TssFlnk;TssFlnkD;TxWk;EnhWk;EnhA2;EnhBiv;EnhA1	493;312;88;134;255;273;64;21;10;3;8;1;1	cg01309328
cg01310881	cg01310881	-0.0180388	0.004135	-4.36247	1.28602e-05	0.043847	cg01310881_BC21	71670582	AACTCAACAATTATTTCCTATTTCTACCTACTTTCTAAACATTTTTCCAC						cg	F	B	C	2	II	12	124898968	Human	GRCh38	ACTCAACAATTGTTTCCTGTTTCTGCCTGCTTTCTAAACATTTTTCCACG	CCCAAATGGAAGACTCAACAATTGTTTCCTGTTTCTGCCTGCTTTCTAAACATTTTTCCA[CG]TCTTACCACCATGCACATAGTTTTTAACTATTTTATCCATTTGTGTGTGTGACACTAAGG	CCTTAGTGTCACACACACAAATGGATAAAATAGTTAAAAACTATGTGCATGGTGGTAAGA[CG]TGGAAAAATGTTTAGAAAGCAGGCAGAAACAGGAAACAATTGTTGAGTCTTCCATTTGGG	1													FALSE		EH38D4741178	EH38E3049524|DNase-H3K4me3/CTCF-bound;EH38E3049524|Low-DNase	1;86	TxWk;Quies;Tx;EnhWk;TssFlnkU;EnhA1;EnhG1;TssFlnkD;EnhA2;TssFlnk;EnhG2;TssA;ReprPCWk	523;338;188;340;14;69;51;75;45;7;8;2;3
cg01311036	cg01311036	-0.0339943	0.00765002	-4.44368	8.84331e-06	0.0349034	cg01311036_BC21	68787437	ACAACTAAAACTCTCATCACTACTAATAAAATTATAAATATTACAACCAC						cg	R	B	C	2	II	1	222047370	Human	GRCh38	CAACTAGAACTCTCATCACTGCTGGTGGGGTTATAAATGTTACAGCCACG	TTATATGTGTGTGTGTGCATGTGTGTGTATATTAGTAAATACTGCCCAACAATTTTCAAA[CG]TGGCTGTAACATTTATAACCCCACCAGCAGTGATGAGAGTTCTAGTTGCTTTAGACCCTT	TTATATGTGTGTGTGTGCATGTGTGTGTATATTAGTAAATACTGCCCAACAATTTTCAAA[CG]TGGCTGTAACATTTATAACCCCACCAGCAGTGATGAGAGTTCTAGTTGCTTTAGACCCTT	1													FALSE		EH38D4464838			Quies;ReprPCWk;EnhWk;TxWk;TssFlnkD;EnhA2;EnhA1	1401;15;65;135;1;6;40
cg01338378	cg01338378	-0.027296	0.00497172	-5.49026	4.01335e-08	0.00135695	cg01338378_TC21	52788116	RCAAACATATCACTAAACTTCCTAAAAACTAAAACATTCCTCCTTTATCC						cg	R	T	C	2	II	7	102395908	Human	GRCh38	CGGACAAAGGAGGAATGTCCCAGTCTTCAGGAAGCTCAGTGACATGTTTG	AGACGGTCATTCATTGGCAGAGGTGTATTTGCGGGGGGCCAGGTATAGAGTAATTCAAGG[CG]GACAAAGGAGGAATGTCCCAGTCTTCAGGAAGCTCAGTGACATGTTTGCGCTGTCTTATG	CATAAGACAGCGCAAACATGTCACTGAGCTTCCTGAAGACTGGGACATTCCTCCTTTGTC[CG]CCTTGAATTACTCTATACCTGGCCCCCCGCAAATACACCTCTGCCAATGAATGACCGTCT	1	TSS1500	PRKRIP1	NM_024653.4	chr7:102396023-102396570	N_Shore	TSS1500	ENSG00000128563.13	ENST00000397912.3			7:102036041-102037243	Promoter_Associated	TRUE		EH38D4010203	EH38E2577238|Low-DNase;EH38E2577238|pELS	57;30	Quies;TxWk;TssFlnkU;TssA;EnhA2;TssFlnkD;TssFlnk;EnhA1;Tx	799;28;654;163;6;3;5;4;1	cg01338378
cg01357381	cg01357381	-0.022483	0.00518547	-4.33577	1.4525e-05	0.0468032	cg01357381_TC21	58704294	CAATCCAAAAATTAATTCCAAAAATACTCTACRTCCCAACCTCCTACAAC						cg	F	T	C	2	II	10	3197497	Human	GRCh38	CGCTGCAGGAGGCTGGGACGCAGAGCATTCCTGGAATTAATTCCTGGACT	CGCTTTCCCAGCAGTCCAGGAATTAATTCCAGGAATGCTCTGCGTCCCAGCCTCCTGCAG[CG]GGACTCTCTGTCCGCTGCTTCCAGCCGAAGGCCACCGGAGGGCAGCAGAGGCCTGGCTGA	CGCTTTCCCAGCAGTCCAGGAATTAATTCCAGGAATGCTCTGCGTCCCAGCCTCCTGCAG[CG]GGACTCTCTGTCCGCTGCTTCCAGCCGAAGGCCACCGGAGGGCAGCAGAGGCCTGGCTGA	1											10:3238914-3240363	Unclassified	TRUE		EH38D4485992	EH38E2881882|CTCF-only/CTCF-bound;EH38E2881882|dELS/CTCF-bound;EH38E2881882|DNase-H3K4me3/CTCF-bound;EH38E2881882|Low-DNase	36;8;33;10	Tx;EnhWk;TssFlnkD;EnhBiv;TssFlnk;TssFlnkU;Quies;EnhA1;TssBiv;TxWk;EnhA2;ReprPCWk;TssA;ReprPC;EnhG1	790;275;43;43;52;93;67;138;49;45;27;18;18;2;3	cg01357381
cg01360989	cg01360989	-0.0338679	0.0072064	-4.6997	2.60538e-06	0.016582	cg01360989_BC21	33781564	TCAATAACTAATCACRAATCCTTAAACAAACCCTAAACATTATCTAACCC						cg	R	B	C	2	II	1	28668303	Human	GRCh38	CAGTAACTGGTCACGAGTCCTTGAGCAAGCCCTAAGCATTGTCTGACCCG	CAGGGGAGTCAAGACTTCAACCCAGAAACTCACAAGCAGGAAAAACTTGGCAAACAGGCA[CG]GGTCAGACAATGCTTAGGGCTTGCTCAAGGACTCGTGACCAGTTACTGATCTATGCAGAT	CAGGGGAGTCAAGACTTCAACCCAGAAACTCACAAGCAGGAAAAACTTGGCAAACAGGCA[CG]GGTCAGACAATGCTTAGGGCTTGCTCAAGGACTCGTGACCAGTTACTGATCTATGCAGAT	1	TSS1500;TSS1500;TSS1500	GMEB1;GMEB1;GMEB1	NM_024482.3;NM_001319674.2;NM_006582.4	chr1:28668659-28669321	N_Shore	TSS1500;TSS1500;TSS1500	ENSG00000162419.13;ENSG00000162419.13;ENSG00000162419.13	ENST00000361872.8;ENST00000294409.2;ENST00000373816.6					FALSE		EH38D2144251	EH38E1332470|Low-DNase;EH38E1332470|pELS	63;24	Quies;TxWk;TssFlnkU;TssA;EnhWk;EnhA1;EnhA2;TssFlnkD	676;119;729;85;26;10;16;2
cg01363264	cg01363264	-0.0401953	0.00864961	-4.64706	3.36692e-06	0.0195264	cg01363264_TC21	13678227	ACTCTATCCTCTACAATAACTTCCCTACTTTAATTCTCCTTCTCCTTTCC						cg	F	T	C	2	II	20	40279538	Human	GRCh38	CGGAAAGGAGAAGGAGAACTAAAGCAGGGAAGTTACTGCAGAGGACAGAG	TGTCTGGTCATGCTCTGTCCTCTGCAGTAACTTCCCTGCTTTAGTTCTCCTTCTCCTTTC[CG]GAGCCAGTCCCTTCCAGCTTCTCCTCTGGTTATTCTAGTGGAGCCCCATGATGTCTGTTC	TGTCTGGTCATGCTCTGTCCTCTGCAGTAACTTCCCTGCTTTAGTTCTCCTTCTCCTTTC[CG]GAGCCAGTCCCTTCCAGCTTCTCCTCTGGTTATTCTAGTGGAGCCCCATGATGTCTGTTC	1													FALSE		EH38D3299336	EH38E2112489|dELS;EH38E2112489|DNase-only;EH38E2112489|Low-DNase	8;19;60	Quies;ReprPCWk;TxWk;EnhWk;EnhA2;EnhA1;ReprPC;TssA;TssFlnk;TssFlnkD;Het	1059;183;35;212;87;62;20;2;1;1;1
cg01364625	cg01364625	-0.0771354	0.0135277	-5.70205	1.18374e-08	0.000673991	cg01364625_TC11	64707140	TAACTCCAAACCCAATAAACTCCTCTAAAAAACACATCCATTTCAAAACA	76770482	TAACTCCAAACCCAATAAACTCCTCTAAAAAACACGTCCGTTTCAAAACG	A	Red	R	cg	R	T	C	1	I	17	8039010	Human	GRCh38	CGCCCTGAAACGGACGTGCTTTTTAGAGGAGTCCACTGGGCTTGGAGTCA	CAATCCCCCGCCCACCCCCACTTTAGTTGCGTGTTCCAGCCTCTCCGCCCCGCCCCTCCC[CG]CCCTGAAACGGACGTGCTTTTTAGAGGAGTCCACTGGGCTTGGAGTCAGTGGCAATAACC	GGTTATTGCCACTGACTCCAAGCCCAGTGGACTCCTCTAAAAAGCACGTCCGTTTCAGGG[CG]GGGAGGGGCGGGGCGGAGAGGCTGGAACACGCAACTAAAGTGGGGGTGGGCGGGGGATTG	1	TSS200;TSS200;TSS200	ALOX15B;ALOX15B;ALOX15B	NM_001039131.2;NM_001039130.2;NM_001141.3			TSS200;TSS200;TSS200;TSS200;TSS200	ENSG00000179593.16;ENSG00000179593.16;ENSG00000179593.16;ENSG00000179593.16;ENSG00000179593.16	ENST00000572022.5;ENST00000380173.6;ENST00000380183.9;ENST00000571240.1;ENST00000573359.1					FALSE		EH38D4986988	EH38E3207563|DNase-only;EH38E3207563|Low-DNase;EH38E3207563|PLS	4;72;11	ReprPCWk;TxWk;ReprPC;Quies;TssBiv;TssFlnk;EnhBiv;TssFlnkU;Het;EnhA2;TssFlnkD;EnhWk	657;100;382;391;55;54;8;1;2;6;6;1
cg01373189	cg01373189	-0.0553864	0.00930412	-5.95289	2.63451e-09	0.000275491	cg01373189_BC22	20767594	CATCTTTCTTTAACAACCTACCAAAAATATTATTAAAAAACTTTATTACC						cg	F	B	C	2	II	13	32428683	Human	GRCh38	ATCTTTCTTTAGCAGCCTGCCAAAAATATTATTAGAAAGCTTTGTTGCCG	TTTTCTTATTTCATCTTTCTTTAGCAGCCTGCCAAAAATATTATTAGAAAGCTTTGTTGC[CG]CTACATAACTTTAAATCTCTCCTTCCTCAGAAAAAGCACCCATAAAACTCAGATTGATTT	AAATCAATCTGAGTTTTATGGGTGCTTTTTCTGAGGAAGGAGAGATTTAAAGTTATGTAG[CG]GCAACAAAGCTTTCTAATAATATTTTTGGCAGGCTGCTAAAGAAAGATGAAATAAGAAAA	2	TSS1500;TSS1500;TSS1500;TSS1500;TSS1500;TSS1500;TSS1500;TSS1500;TSS1500;TSS1500;TSS1500;TSS1500;TSS1500;TSS1500;TSS1500;TSS1500;TSS1500;TSS1500;TSS1500;TSS1500;TSS1500;TSS1500	N4BP2L1;N4BP2L1;N4BP2L1;N4BP2L1;N4BP2L1;N4BP2L1;N4BP2L1;N4BP2L1;N4BP2L1;N4BP2L1;N4BP2L1;N4BP2L1;N4BP2L1;N4BP2L1;N4BP2L1;N4BP2L1;N4BP2L1;N4BP2L1;N4BP2L1;N4BP2L1;N4BP2L1;N4BP2L1	NM_001353637.2;NM_001353631.2;NM_001353629.2;NM_001353627.2;NM_001353628.2;NM_001353633.2;NM_001353632.2;NM_052818.3;NM_001286459.2;NM_001286461.2;NM_001353630.2;NM_001079691.2;NM_001286460.2;NM_001353634.2;NM_001353635.2;NM_001353636.2;NR_148475.2;NR_148480.2;NR_148478.2;NR_148476.2;NR_148477.2;NR_148479.2	chr13:32427112-32427740	S_Shore	TSS1500;TSS1500;TSS1500;TSS1500;TSS1500;TSS1500;TSS1500;TSS1500;TSS1500;TSS1500;TSS1500	ENSG00000139597.18;ENSG00000139597.18;ENSG00000139597.18;ENSG00000139597.18;ENSG00000139597.18;ENSG00000139597.18;ENSG00000139597.18;ENSG00000139597.18;ENSG00000139597.18;ENSG00000139597.18;ENSG00000139597.18	ENST00000380130.7;ENST00000380139.8;ENST00000613078.4;ENST00000635608.1;ENST00000459716.6;ENST00000635178.1;ENST00000380133.6;ENST00000495479.5;ENST00000343281.9;ENST00000472298.1;ENST00000464470.1					FALSE					TxWk;Quies;TssFlnkU;ReprPCWk;ReprPC;TssA;EnhBiv;TssBiv;EnhWk;TssFlnk;EnhA2;TssFlnkD;EnhA1	53;797;424;93;7;102;10;49;31;21;44;12;20	cg01373189
cg01373189	cg01373189	-0.0553864	0.00930412	-5.95289	2.63451e-09	0.000275491	cg01373189_BC21	92725364	CATCTTTCTTTAACAACCTACCAAAAATATTATTAAAAAACTTTATTACC						cg	F	B	C	2	II	13	32428683	Human	GRCh38	ATCTTTCTTTAGCAGCCTGCCAAAAATATTATTAGAAAGCTTTGTTGCCG	TTTTCTTATTTCATCTTTCTTTAGCAGCCTGCCAAAAATATTATTAGAAAGCTTTGTTGC[CG]CTACATAACTTTAAATCTCTCCTTCCTCAGAAAAAGCACCCATAAAACTCAGATTGATTT	AAATCAATCTGAGTTTTATGGGTGCTTTTTCTGAGGAAGGAGAGATTTAAAGTTATGTAG[CG]GCAACAAAGCTTTCTAATAATATTTTTGGCAGGCTGCTAAAGAAAGATGAAATAAGAAAA	1	TSS1500;TSS1500;TSS1500;TSS1500;TSS1500;TSS1500;TSS1500;TSS1500;TSS1500;TSS1500;TSS1500;TSS1500;TSS1500;TSS1500;TSS1500;TSS1500;TSS1500;TSS1500;TSS1500;TSS1500;TSS1500;TSS1500	N4BP2L1;N4BP2L1;N4BP2L1;N4BP2L1;N4BP2L1;N4BP2L1;N4BP2L1;N4BP2L1;N4BP2L1;N4BP2L1;N4BP2L1;N4BP2L1;N4BP2L1;N4BP2L1;N4BP2L1;N4BP2L1;N4BP2L1;N4BP2L1;N4BP2L1;N4BP2L1;N4BP2L1;N4BP2L1	NM_001353637.2;NM_001353631.2;NM_001353629.2;NM_001353627.2;NM_001353628.2;NM_001353633.2;NM_001353632.2;NM_052818.3;NM_001286459.2;NM_001286461.2;NM_001353630.2;NM_001079691.2;NM_001286460.2;NM_001353634.2;NM_001353635.2;NM_001353636.2;NR_148475.2;NR_148480.2;NR_148478.2;NR_148476.2;NR_148477.2;NR_148479.2	chr13:32427112-32427740	S_Shore	TSS1500;TSS1500;TSS1500;TSS1500;TSS1500;TSS1500;TSS1500;TSS1500;TSS1500;TSS1500;TSS1500	ENSG00000139597.18;ENSG00000139597.18;ENSG00000139597.18;ENSG00000139597.18;ENSG00000139597.18;ENSG00000139597.18;ENSG00000139597.18;ENSG00000139597.18;ENSG00000139597.18;ENSG00000139597.18;ENSG00000139597.18	ENST00000380130.7;ENST00000380139.8;ENST00000613078.4;ENST00000635608.1;ENST00000459716.6;ENST00000635178.1;ENST00000380133.6;ENST00000495479.5;ENST00000343281.9;ENST00000472298.1;ENST00000464470.1					FALSE					TxWk;Quies;TssFlnkU;ReprPCWk;ReprPC;TssA;EnhBiv;TssBiv;EnhWk;TssFlnk;EnhA2;TssFlnkD;EnhA1	53;797;424;93;7;102;10;49;31;21;44;12;20	cg01373189
cg01381568	cg01381568	-0.033337	0.00766946	-4.34672	1.38188e-05	0.045687	cg01381568_BC21	97690179	TTTTTAAAACCATATCTAACCTTTAAAAACTCTCCACCAAATATCCAAAC						cg	R	B	C	2	II	2	225615456	Human	GRCh38	TTTTAAGACCATGTCTGGCCTTTAAAAGCTCTCCACCAAATATCCAGACG	TTTGGTGGCAATATCTCTACAATCCTCATGTATTCTGATAAAAAAAAAGAATAATTCCAA[CG]TCTGGATATTTGGTGGAGAGCTTTTAAAGGCCAGACATGGTCTTAAAAATTCTATTTATT	TTTGGTGGCAATATCTCTACAATCCTCATGTATTCTGATAAAAAAAAAGAATAATTCCAA[CG]TCTGGATATTTGGTGGAGAGCTTTTAAAGGCCAGACATGGTCTTAAAAATTCTATTTATT	1													FALSE					Quies;EnhA2;EnhWk;ReprPCWk;TxWk;Het;EnhA1	1626;7;3;19;3;4;1
cg01381687	cg01381687	-0.029394	0.00669411	-4.39102	1.1282e-05	0.0404597	cg01381687_BC21	47609980	CAATACTTCTTCCATAAAAATTACCTACCCTCAACCAATCAAAACTTCCC						cg	R	B	C	2	II	9	128685043	Human	GRCh38	AGTGCTTCTTCCATAAGAGTTGCCTGCCCTCAGCCAATCAAAGCTTCCCG	GAGGGTTGTGGTGGAGCCTTCCTGGGCTGGGTGTGGATAGGCCCAGGGCCTGCAAGGAAA[CG]GGAAGCTTTGATTGGCTGAGGGCAGGCAACTCTTATGGAAGAAGCACTGAGGAGGAGTCC	GAGGGTTGTGGTGGAGCCTTCCTGGGCTGGGTGTGGATAGGCCCAGGGCCTGCAAGGAAA[CG]GGAAGCTTTGATTGGCTGAGGGCAGGCAACTCTTATGGAAGAAGCACTGAGGAGGAGTCC	1	TSS200	SET	NM_001248000.2	chr9:128688693-128690403	N_Shelf	TSS1500;TSS1500;TSS200	ENSG00000234705.3;ENSG00000234705.3;ENSG00000119335.18	ENST00000689585.1;ENST00000652876.3;ENST00000409104.7					FALSE		EH38D4243027	EH38E2729769|DNase-only;EH38E2729769|Low-DNase;EH38E2729769|pELS;EH38E2729769|PLS	1;27;5;54	Quies;ReprPCWk;TssFlnkU;TssA;EnhA1;TxWk;EnhWk;EnhA2;TssFlnk;EnhBiv;EnhG2;TssBiv;TssFlnkD;ReprPC	758;5;600;70;60;80;16;31;18;5;2;2;15;1
cg01389693	cg01389693	0.10373	0.0183674	5.64753	1.62774e-08	0.000809344	cg01389693_TC21	67697871	TTTACCTTTTAATCTAAAAATCAATTAACCTACRACTAAATATAACCATC						cg	R	T	C	2	II	4	69639721	Human	GRCh38	CGATGGTTACACTCAGTCGTAGGTCAATTGATCTTTAGATTAAAAGGTAA	ATGAAAAAAAAATCTTCAAAGTATATTTAGGTCAATTTTTAAATAAAGTAATATTTAGTG[CG]ATGGTTACACTCAGTCGTAGGTCAATTGATCTTTAGATTAAAAGGTAAATAATATAATTC	GAATTATATTATTTACCTTTTAATCTAAAGATCAATTGACCTACGACTGAGTGTAACCAT[CG]CACTAAATATTACTTTATTTAAAAATTGACCTAAATATACTTTGAAGATTTTTTTTTCAT	1	TSS200;TSS200	UGT2A2;UGT2A2	NM_001105677.2;NM_001301233.1			TSS200;TSS200	ENSG00000271271.6;ENSG00000271271.6	ENST00000604629.6;ENST00000604021.1					FALSE					Quies;Het;ZNF/Rpts;ReprPCWk;TxWk	1636;15;5;4;3
cg01394116	cg01394116	-0.0409773	0.0093183	-4.39751	1.09498e-05	0.0397379	cg01394116_BC21	41614520	CCAATATTTTATAAATTTCAAACCATTCTAATACCACTTTCATACTTACC						cg	F	B	C	2	II	5	150701937	Human	GRCh38	CAATATTTTATGAGTTTCAAGCCATTCTGGTACCACTTTCATACTTACCG	TAACCACTCTGCCAATATTTTATGAGTTTCAAGCCATTCTGGTACCACTTTCATACTTAC[CG]TGTCATCAAGCTACCTAACACATTTATTTAAATCACCTCATTAAAAAAAAAAGTTGATTT	AAATCAACTTTTTTTTTTAATGAGGTGATTTAAATAAATGTGTTAGGTAGCTTGATGACA[CG]GTAAGTATGAAAGTGGTACCAGAATGGCTTGAAACTCATAAAATATTGGCAGAGTGGTTA	1	TSS1500	RBM22	NM_018047.3	chr5:150700569-150701141	S_Shore	TSS1500;TSS1500;TSS1500;TSS1500;TSS1500;TSS1500;TSS1500	ENSG00000086589.12;ENSG00000086589.12;ENSG00000086589.12;ENSG00000086589.12;ENSG00000086589.12;ENSG00000086589.12;ENSG00000086589.12	ENST00000199814.9;ENST00000447771.6;ENST00000522469.5;ENST00000518917.5;ENST00000521248.5;ENST00000521594.1;ENST00000521464.1					FALSE					Quies;EnhBiv;TxWk;EnhA2;TssFlnk;TssFlnkD;ReprPCWk;EnhWk;Het;EnhA1;TssFlnkU;TssA;Tx;ReprPC;EnhG1	732;1;664;30;29;25;86;56;2;22;6;5;1;3;1	cg01394116
cg01401327	cg01401327	-0.0558759	0.012642	-4.41988	9.87579e-06	0.037392	cg01401327_BC21	70784955	ACAAATCATATATATTTCACTTTTTTAATTCAAACCCAAAAAATCTACAC						cg	F	B	C	2	II	7	101813895	Human	GRCh38	CAGGTCATATATATTTCACTTTTTTGGTTCAAACCCAGGGGATCTACACG	GGGAGTATTACACAGGTCATATATATTTCACTTTTTTGGTTCAAACCCAGGGGATCTACA[CG]ATAATTAGATTGAGAACATCTGCATCAAATCCAAACCATTTCCCTGATCCTTCCTTGAGC	GCTCAAGGAAGGATCAGGGAAATGGTTTGGATTTGATGCAGATGTTCTCAATCTAATTAT[CG]TGTAGATCCCCTGGGTTTGAACCAAAAAAGTGAAATATATATGACCTGTGTAATACTCCC	1				chr7:101814138-101817750	N_Shore								FALSE					EnhA2;TxWk;TssBiv;ReprPC;EnhWk;Quies;Tx;TssFlnkD;TssFlnk;ReprPCWk;TssFlnkU;TssA;EnhBiv;EnhA1;EnhG2;EnhG1	57;400;234;33;86;210;130;84;141;49;117;28;23;36;6;29	cg01401327
cg01429256	cg01429256	-0.0315578	0.00658415	-4.79299	1.64317e-06	0.0122006	cg01429256_BC21	82741547	AACACTTTTTACAAAACACATTCTAAATCAAATCTCCCCCTCATTTTACC						cg	R	B	C	2	II	17	17784520	Human	GRCh38	ACACTTTTTGCAGAGCACATTCTAGGTCAAATCTCCCCCTCATTTTGCCG	GCCCTGCTGGGCGTCCTGCACAAGCCACTGGCCCACTCTGGGCTTCTTCCATTAATCCCT[CG]GCAAAATGAGGGGGAGATTTGACCTAGAATGTGCTCTGCAAAAAGTGTCTTCCCGTGGCT	GCCCTGCTGGGCGTCCTGCACAAGCCACTGGCCCACTCTGGGCTTCTTCCATTAATCCCT[CG]GCAAAATGAGGGGGAGATTTGACCTAGAATGTGCTCTGCAAAAAGTGTCTTCCCGTGGCT	1				chr17:17781702-17783926	S_Shore						17:17687648-17689049	Unclassified	TRUE		EH38D4994518	EH38E3212219|dELS;EH38E3212219|Low-DNase	9;78	TxWk;Quies;EnhA1;TssFlnkU;Tx;EnhWk;EnhBiv;EnhA2;TssBiv;EnhG1;TssFlnk;ReprPCWk;TssFlnkD;ReprPC;EnhG2	465;79;298;149;291;255;26;12;44;15;6;8;9;5;1	cg01429256
cg01429899	cg01429899	-0.0333595	0.00510883	-6.52978	6.58677e-11	2.8865e-05	cg01429899_BC21	45775279	CTTAACCACTATAAAAATAATCAAAACCACAATCTAAAATCCTTTTCACC						cg	F	B	C	2	II	7	24791198	Human	GRCh38	TTGACCACTGTGGGAGTGGTCAAGACCACAGTCTGGGGTCCTTTTCACCG	GGCTGGGATTCCTTGACCACTGTGGGAGTGGTCAAGACCACAGTCTGGGGTCCTTTTCAC[CG]TGGCTGCAAGAGGGCTATGTTCTAATCCTTGATCTACACCTGATCACCTTTGCTGTCTTC	GAAGACAGCAAAGGTGATCAGGTGTAGATCAAGGATTAGAACATAGCCCTCTTGCAGCCA[CG]GTGAAAAGGACCCCAGACTGTGGTCTTGACCACTCCCACAGTGGTCAAGGAATCCCAGCC	1													FALSE					Quies;ReprPCWk;TxWk;EnhWk;Het;EnhA2;Tx;EnhA1	1293;83;227;33;15;5;2;5
cg01437411	cg01437411	-0.0268661	0.00562044	-4.78007	1.75233e-06	0.012815	cg01437411_BC21	56731554	ATACCTTTTAATTTCAATATAAACATCTCATCTTTCCCTTTTCTCCTAAC						cg	F	B	C	2	II	12	6924748	Human	GRCh38	TGCCTTTTAGTTTCAGTGTGGGCATCTCATCTTTCCCTTTTCTCCTGGCG	TTTCCATTTCTGTGCCTTTTAGTTTCAGTGTGGGCATCTCATCTTTCCCTTTTCTCCTGG[CG]ACCCTTTATGCCTCCCTTGGGGTTTCCTGTACTTTCCTCTGTGCCTCTCAGTTTTCTCTG	CAGAGAAAACTGAGAGGCACAGAGGAAAGTACAGGAAACCCCAAGGGAGGCATAAAGGGT[CG]CCAGGAGAAAAGGGAAAGATGAGATGCCCACACTGAAACTAAAAGGCACAGAAATGGAAA	1				chr12:6927538-6928761	N_Shelf						12:7033156-7033993	Unclassified	TRUE					Quies;TssFlnkU;ReprPCWk;TxWk;Tx;EnhA1;EnhA2;TssFlnkD;EnhWk;ReprPC;TssA;TssFlnk;EnhG1;EnhBiv;Het	494;609;125;87;53;165;19;11;16;70;7;2;2;2;1	cg01437411	cg01437411
cg01438537	cg01438537	-0.0308282	0.00672748	-4.58243	4.59598e-06	0.0235034	cg01438537_TC21	61610252	CCAACTACCAACACTAAAAAACTAAACTCTAACCAAATACAATAACTCAC						cg	R	T	C	2	II	2	70121823	Human	GRCh38	CGTGAGCCACTGCACCTGGCTAGAGCTTAGTTCTCTAGTGTTGGTAGTTG	CTTGAATTCCTGACCTCAAGTGATCTGCCCCCCTCGGCCTCCCAAAGTGCTGGGATTAGG[CG]TGAGCCACTGCACCTGGCTAGAGCTTAGTTCTCTAGTGTTGGTAGTTGGAGCCTGCTTTT	AAAAGCAGGCTCCAACTACCAACACTAGAGAACTAAGCTCTAGCCAGGTGCAGTGGCTCA[CG]CCTAATCCCAGCACTTTGGGAGGCCGAGGGGGGCAGATCACTTGAGGTCAGGAATTCAAG	1				chr2:70124183-70124418;chr2:70125072-70125399	N_Shelf;N_Shelf								FALSE		EH38D5201008	EH38E3350730|dELS;EH38E3350730|Low-DNase	9;78	TssFlnkD;TssFlnk;TxWk;EnhWk;EnhA2;EnhA1;Quies;TssA;TssFlnkU	114;550;500;53;77;115;102;132;20	cg01438537
cg01440687	cg01440687	-0.108821	0.0244841	-4.44456	8.80734e-06	0.0348422	cg01440687_TC21	81758138	CCCCTTCTCTATAATAATTCACTTTCACAACACAAAAATATACTACAATC						cg	F	T	C	2	II	14	42541814	Human	GRCh38	CGATTGCAGCATACTTTTGTGTTGTGAAAGTGAACTATTATAGAGAAGGG	CTATACTTCTCCCCCTTCTCTATAATAGTTCACTTTCACAACACAAAAGTATGCTGCAAT[CG]TGTATATAAAACAATAGTAATAAAAGAACAAAAATATCATTAAATACCATCTTTTCCATT	CTATACTTCTCCCCCTTCTCTATAATAGTTCACTTTCACAACACAAAAGTATGCTGCAAT[CG]TGTATATAAAACAATAGTAATAAAAGAACAAAAATATCATTAAATACCATCTTTTCCATT	1													FALSE		EH38D2712788	EH38E1710840|dELS;EH38E1710840|DNase-only;EH38E1710840|Low-DNase	1;4;82	Quies;EnhWk;Het;EnhA1;ReprPCWk;EnhA2;ZNF/Rpts;TssFlnkD	1617;10;23;6;1;4;1;1
cg01450522	cg01450522	-0.0475292	0.00923345	-5.1475	2.63977e-07	0.00429102	cg01450522_TC21	53646205	AAAACAAATCCAAAATATCCTATCATTTCRTCTATATTTCAATTTATATC						cg	F	T	C	2	II	3	13424378	Human	GRCh38	CGATACAAACTGAAATACAGACGAAATGACAGGATATCTTGGATTTGTTT	TATCTCATTTTGAAACAAATCCAAGATATCCTGTCATTTCGTCTGTATTTCAGTTTGTAT[CG]CTAAGAGATAAGGACCCTTTTATAGACATAACCACAATACTATTATCACACATAAAAAAG	TATCTCATTTTGAAACAAATCCAAGATATCCTGTCATTTCGTCTGTATTTCAGTTTGTAT[CG]CTAAGAGATAAGGACCCTTTTATAGACATAACCACAATACTATTATCACACATAAAAAAG	1				chr3:13419470-13420646	S_Shelf						3:13465851-13466010	Unclassified_Cell_type_specific	TRUE		EH38D5428158	EH38E3497084|DNase-only;EH38E3497084|Low-DNase	3;84	TxWk;Tx;Quies;EnhWk;ReprPCWk;EnhG1;EnhA2;EnhA1;ReprPC;Het	354;162;1021;25;83;10;4;1;1;2	cg01450522
cg01456243	cg01456243	-0.025707	0.0052025	-4.94128	7.76132e-07	0.00785655	cg01456243_BC21	22748189	CCTAAAAACRTAAATATCCAACTAAAACCCAAACATCAACTTAAATAAAC						cg	R	B	C	2	II	15	90935752	Human	GRCh38	CTGGGAGCGTGAATGTCCAGCTGGGGCCCAAGCATCAGCTTAGATGGGCG	GCCACCTCAAGCTGGTGAGGGAGCCTGGCGCTCTTCCCCTCGCCCGCCCGGGCCCCGGTT[CG]CCCATCTAAGCTGATGCTTGGGCCCCAGCTGGACATTCACGCTCCCAGGCCATCCCCGCT	GCCACCTCAAGCTGGTGAGGGAGCCTGGCGCTCTTCCCCTCGCCCGCCCGGGCCCCGGTT[CG]CCCATCTAAGCTGATGCTTGGGCCCCAGCTGGACATTCACGCTCCCAGGCCATCCCCGCT	1				chr15:90932396-90932696;chr15:90934887-90935753	S_Shelf;Island	TSS1500;TSS1500;TSS1500;TSS1500	ENSG00000184508.12;ENSG00000184508.12;ENSG00000184508.12;ENSG00000184508.12	ENST00000643068.1;ENST00000646620.1;ENST00000448987.2;ENST00000438890.1					FALSE					TxWk;TssA;EnhWk;EnhG1;TssFlnkU;Tx;EnhA1;EnhA2;Quies;EnhG2;TssFlnkD;TssFlnk	349;477;68;161;312;137;24;9;65;12;9;40	cg01456243
cg01457077	cg01457077	-0.0494506	0.00890043	-5.55598	2.76061e-08	0.00107286	cg01457077_BC21	47668118	AATAAAAAATCACRAACACCTAATAAAACAACTAAACATAACTTTATCCC						cg	F	B	C	2	II	2	238319932	Human	GRCh38	GTAAAGAATCACGGACACCTAGTAGGACAACTAGGCATGGCTTTGTCCCG	AGAGGACAGGTGGTAAAGAATCACGGACACCTAGTAGGACAACTAGGCATGGCTTTGTCC[CG]GTTTCAGAGCACCGACACAGCATTTAGTCACCATTTACCTTCTTGGGAGGTGGGTTAGGC	GCCTAACCCACCTCCCAAGAAGGTAAATGGTGACTAAATGCTGTGTCGGTGCTCTGAAAC[CG]GGACAAAGCCATGCCTAGTTGTCCTACTAGGTGTCCGTGATTCTTTACCACCTGTCCTCT	1	TSS1500;TSS1500	TRAF3IP1;TRAF3IP1	NM_001139490.1;NM_015650.4	chr2:238320233-238320795	N_Shore	TSS1500;TSS1500;TSS1500	ENSG00000204104.12;ENSG00000204104.12;ENSG00000204104.12	ENST00000391993.7;ENST00000373327.5;ENST00000409739.2			2:239228421-239229919	Promoter_Associated	TRUE		EH38D5295462	EH38E3411113|DNase-H3K4me3;EH38E3411113|Low-DNase;EH38E3411113|pELS	3;82;2	Quies;ReprPCWk;TssFlnkU;EnhA2;TssA;TssBiv;TssFlnkD;ReprPC;TssFlnk;EnhWk;TxWk;EnhG2;EnhA1;EnhBiv	181;95;444;66;373;38;246;14;119;27;21;23;9;7	cg01457077
cg01457612	cg01457612	0.0541944	0.0118926	4.55698	5.18936e-06	0.0252094	cg01457612_BC21	58617985	AACCAATAATATTTACAAACRTATATCAAATCATAACACTAAAACTAAAC						cg	R	B	C	2	II	5	55983277	Human	GRCh38	GCCAATAATGTTTGCAAGCGTATATCAAATCATAGCACTAGGGCTGGGCG	TCAAAGGGATCTGCCCACCTCAGACTCCCAAAGTGTTGGGATTACAGGCATGAGCCACCG[CG]CCCAGCCCTAGTGCTATGATTTGATATACGCTTGCAAACATTATTGGCTCACCCACACCT	TCAAAGGGATCTGCCCACCTCAGACTCCCAAAGTGTTGGGATTACAGGCATGAGCCACCG[CG]CCCAGCCCTAGTGCTATGATTTGATATACGCTTGCAAACATTATTGGCTCACCCACACCT	1						TSS1500	ENSG00000134352.21	ENST00000522633.2					FALSE		EH38D3704165	EH38E2373025|CTCF-only/CTCF-bound;EH38E2373025|DNase-only;EH38E2373025|Low-DNase;EH38E2373025|pELS	2;3;81;1	EnhWk;ReprPCWk;Quies;EnhA1;TxWk;EnhA2;ReprPC;TssFlnkU;EnhG1;TssFlnkD;EnhG2;TssFlnk;Het	220;32;874;120;356;30;1;9;4;14;1;1;1
cg01459052	cg01459052	-0.0286433	0.00603391	-4.74706	2.06396e-06	0.0142622	cg01459052_TC21	86694262	AAATTTACACACAAATAATAAACTTCAAAATTCTTCTTCCTCTCCATTAC						cg	F	T	C	2	II	3	46975047	Human	GRCh38	CGTAATGGAGAGGAAGAAGAATTCTGAAGTTCACTACCTGTGTGCAAACC	AAAGCAAACTAGGGTTTGCACACAGGTAGTGAACTTCAGAATTCTTCTTCCTCTCCATTA[CG]TTGGAAAGATGAACAAAGTAGAAATGGAACTTTTCATTTGCTGTTAAACGACAGCAAAGA	AAAGCAAACTAGGGTTTGCACACAGGTAGTGAACTTCAGAATTCTTCTTCCTCTCCATTA[CG]TTGGAAAGATGAACAAAGTAGAAATGGAACTTTTCATTTGCTGTTAAACGACAGCAAAGA	1				chr3:46976389-46976822	N_Shore								FALSE		EH38D5448608	EH38E3510884|dELS;EH38E3510884|Low-DNase	4;83	EnhWk;EnhG1;Quies;TxWk;EnhA1;TssFlnkU;TssFlnkD;TssFlnk;EnhA2;EnhG2;TssA;Tx	652;31;87;220;339;106;114;36;50;16;7;5	cg01459052
cg01469409	cg01469409	-0.0512791	0.0105908	-4.84183	1.28647e-06	0.0105054	cg01469409_BC21	65732226	ATCCAACCAATTACCAAACCCAAATAAAAACAATACAACATAACTATAAC						cg	F	B	C	2	II	19	35420564	Human	GRCh38	TCCAGCCAGTTACCAAGCCCAGGTGGGGGCAGTGCAGCATAGCTGTGACG	ATGTGACCAAAGTCCAGCCAGTTACCAAGCCCAGGTGGGGGCAGTGCAGCATAGCTGTGA[CG]TTAGGCCCGGAGGCCACTCTAGGGAGCTGGCAGCACACAGCCAGCTGCCAGGGCGGCAGA	TCTGCCGCCCTGGCAGCTGGCTGTGTGCTGCCAGCTCCCTAGAGTGGCCTCCGGGCCTAA[CG]TCACAGCTATGCTGCACTGCCCCCACCTGGGCTTGGTAACTGGCTGGACTTTGGTCACAT	1													FALSE		EH38D5129454	EH38E3302662|CTCF-only/CTCF-bound;EH38E3302662|dELS/CTCF-bound;EH38E3302662|DNase-only;EH38E3302662|Low-DNase	35;10;4;38	TxWk;Quies;ReprPCWk;EnhWk;ZNF/Rpts;EnhA1;Het;Tx;ReprPC;EnhBiv;EnhA2;TssFlnkU;TssFlnkD;TssBiv;TssFlnk	735;423;236;116;5;45;18;16;15;12;37;1;2;1;1
cg01470834	cg01470834	-0.0426063	0.00930407	-4.57932	4.66493e-06	0.0236826	cg01470834_BC21	45771171	AATATACCCTAAAATTACTATTCTTCCTTAACCTAACCCAAAACTAAATC						cg	F	B	C	2	II	1	17736044	Human	GRCh38	ATGTGCCCTAGGATTGCTATTCTTCCTTGGCCTGGCCCAGGGCTGGATCG	TCCCTGTTCCTAATGTGCCCTAGGATTGCTATTCTTCCTTGGCCTGGCCCAGGGCTGGAT[CG]ATTCCTCTCTTAAAGGCACAGGCCTCCCTTTACAGCCATCAGCGGGCATTCTGCAGAGAA	TTCTCTGCAGAATGCCCGCTGATGGCTGTAAAGGGAGGCCTGTGCCTTTAAGAGAGGAAT[CG]ATCCAGCCCTGGGCCAGGCCAAGGAAGAATAGCAATCCTAGGGCACATTAGGAACAGGGA	1													FALSE		EH38D4348878			Tx;EnhG1;Quies;ReprPCWk;ReprPC;TxWk;EnhA2;EnhWk;EnhBiv;EnhG2;Het	729;41;348;420;56;46;5;13;1;2;2
cg01478482	cg01478482	-0.0668541	0.0152998	-4.36961	1.24471e-05	0.0429145	cg01478482_TC21	16783545	CTACTATTATAAAATTACAACAAAATTCTATAATTTATCATATCATTATC						cg	F	T	C	2	II	16	21157202	Human	GRCh38	CGACAATGATATGATAAACCACAGAATCCTGCTGTAATTCCACAATAGCA	AGCTCTTCTTTCTGCTATTGTGGAATTACAGCAGGATTCTGTGGTTTATCATATCATTGT[CG]TGATCATCATCATAAATCATCATCCCAAGCAAATATTTTTGAGCCCCTACTCTGTGCCTC	AGCTCTTCTTTCTGCTATTGTGGAATTACAGCAGGATTCTGTGGTTTATCATATCATTGT[CG]TGATCATCATCATAAATCATCATCCCAAGCAAATATTTTTGAGCCCCTACTCTGTGCCTC	1	TSS1500;TSS1500;TSS1500;TSS1500;TSS1500;TSS1500;TSS1500	LDAF1;LDAF1;LDAF1;LDAF1;LDAF1;LDAF1;LDAF1	NM_001301774.2_2;NM_001301771.2_2;NM_001301775.2_2;NM_001301769.2_2;NM_001301773.2_2;NM_020422.6_2;NR_125971.2_2	chr16:21158489-21158957	N_Shore	TSS1500;TSS1500;TSS1500;TSS1500;TSS1500;TSS1500	ENSG00000011638.11;ENSG00000011638.11;ENSG00000011638.11;ENSG00000011638.11;ENSG00000011638.11;ENSG00000011638.11	ENST00000573487.5;ENST00000572258.5;ENST00000574092.1;ENST00000233047.9;ENST00000261388.7;ENST00000451578.6			16:21167980-21171253	Promoter_Associated	TRUE					Quies;ReprPCWk;EnhWk;EnhA2;EnhA1;ReprPC;TxWk;Het;EnhBiv	926;260;342;26;37;49;20;2;1	cg01478482
cg01479491	cg01479491	-0.0422703	0.00886956	-4.76577	1.88135e-06	0.0133635	cg01479491_TC21	89659439	TTTCTTATTTTACAAAACATTTTCACATTCATTACACCCCACAAAAACCC						cg	F	T	C	2	II	3	188341517	Human	GRCh38	CGATGAAGAAGCAGGAAGAGATGATTCTACTGGCTTCATAGGTGAGGAAA	TTTGAGCTTCTGTTTCCTCACCTATGAAGCCAGTAGAATCATCTCTTCCTGCTTCTTCAT[CG]GGTTCCTGTGGGGTGCAATGAATGTGAAAATGTTTTGTAAAACAAGAAACCATTATGTAG	TTTGAGCTTCTGTTTCCTCACCTATGAAGCCAGTAGAATCATCTCTTCCTGCTTCTTCAT[CG]GGTTCCTGTGGGGTGCAATGAATGTGAAAATGTTTTGTAAAACAAGAAACCATTATGTAG	1						TSS200	ENSG00000145012.14	ENST00000494233.5					FALSE		EH38D5524320			Quies;TxWk;EnhWk;EnhA1;EnhA2;ReprPCWk;EnhG1;Tx	1307;215;60;17;61;1;1;1
cg01481646	cg01481646	-0.035554	0.00694255	-5.12117	3.03647e-07	0.00465619	cg01481646_BC21	14639830	TATTACTTTAAACCTCTAAAACCTAAAAATTACTATTACCACAACAAACC						cg	R	B	C	2	II	10	80457792	Human	GRCh38	GTTGCTTTAAGCCTCTGAGACCTGGGGATTGCTGTTACCACAGCAAACCG	CCAGCACTACCACATGCAGAAGATTGGGGAGTCACTGCTTGTGTCTGTCTGGACAGATCA[CG]GTTTGCTGTGGTAACAGCAATCCCCAGGTCTCAGAGGCTTAAAGCAACAGAGGTTTATTT	CCAGCACTACCACATGCAGAAGATTGGGGAGTCACTGCTTGTGTCTGTCTGGACAGATCA[CG]GTTTGCTGTGGTAACAGCAATCCCCAGGTCTCAGAGGCTTAAAGCAACAGAGGTTTATTT	1	TSS1500;TSS1500	TSPAN14;TSPAN14	NM_001351269.2;NM_001351270.2	chr10:80453800-80455004	S_Shelf						10:82217435-82217608	Promoter_Associated_Cell_type_specific	TRUE		EH38D4532437	EH38E2912479|Low-DNase;EH38E2912479|pELS;EH38E2912479|pELS/CTCF-bound	85;1;1	Quies;ReprPC;TxWk;TssFlnkU;ReprPCWk;TssFlnkD;EnhA1;EnhWk;EnhA2;EnhG2;TssA;EnhG1;TssFlnk	631;10;220;141;157;18;172;249;20;18;4;20;3	cg01481646
cg01486537	cg01486537	-0.0400826	0.0083184	-4.81855	1.44609e-06	0.0113092	cg01486537_BC21	34710561	AACAACTAACCTTCTAAATATACCCCAAAACAATTCTAAATCCAAAAATC						cg	F	B	C	2	II	2	64274117	Human	GRCh38	GCAACTGGCCTTCTGGGTGTGCCCCAGAGCAATTCTGAGTCCAGAGATCG	GGTGCTTCAGTAGCAACTGGCCTTCTGGGTGTGCCCCAGAGCAATTCTGAGTCCAGAGAT[CG]TTTCTGGCACCACCCTCAGCTCTCTCAGGGTTCTGGGAACCCAGTGATCAGAGGCTGGCT	AGCCAGCCTCTGATCACTGGGTTCCCAGAACCCTGAGAGAGCTGAGGGTGGTGCCAGAAA[CG]ATCTCTGGACTCAGAATTGCTCTGGGGCACACCCAGAAGGCCAGTTGCTACTGAAGCACC	1						exon_1;exon_1	ENSG00000288932;ENSG00000288932	ENST00000690726.1;ENST00000692463.2					FALSE					Quies;EnhA1;EnhWk;TssFlnkU;EnhA2;TssA;TxWk;ReprPCWk;TssFlnk;EnhG1	838;533;113;94;53;7;15;6;2;2
cg01493678	cg01493678	-0.0601223	0.0124483	-4.82975	1.36703e-06	0.0109355	cg01493678_TC21	75754101	AAATAAACTCATAAAATTCAATCAAAAAATACCCATTAAAAATATAAATC						cg	F	T	C	2	II	6	32817048	Human	GRCh38	CGATTTATACTCTTAATGGGTACTTTCTGACTGAATTTTATGAGCTCATT	CAGCCTCTTCAGAATGAGCTCATAAAATTCAGTCAGAAAGTACCCATTAAGAGTATAAAT[CG]CTGTTTTTCTGGCTTCCCCAGGATTGGAAACTCCTCAGATTGACAACCAATCAAGATAGA	CAGCCTCTTCAGAATGAGCTCATAAAATTCAGTCAGAAAGTACCCATTAAGAGTATAAAT[CG]CTGTTTTTCTGGCTTCCCCAGGATTGGAAACTCCTCAGATTGACAACCAATCAAGATAGA	1	TSS200	HLA-DOB	NM_002120.4_6			TSS200;TSS200;TSS200;TSS200	ENSG00000241106.8;ENSG00000241106.8;ENSG00000241106.8;ENSG00000241106.8	ENST00000447394.1;ENST00000488325.5;ENST00000438763.7;ENST00000475235.1			6:32784640-32784956	Unclassified_Cell_type_specific	TRUE		EH38D3832550	EH38E2460155|DNase-only;EH38E2460155|Low-DNase;EH38E2460155|pELS;EH38E2460155|PLS	10;71;2;4	ReprPC;Quies;ReprPCWk;TxWk;EnhG1;Tx;TssFlnkU;TssA;EnhA2;EnhA1;EnhG2;TssFlnk;TssFlnkD;EnhWk;Het	97;560;197;250;81;317;28;16;55;13;32;5;3;8;1	cg01493678
cg01502872	cg01502872	-0.0523424	0.0105957	-4.93997	7.81343e-07	0.0078858	cg01502872_TC11	87799870	CAACTCCCTCCCCAAACTAAAAAAACCAAACATCACAAATTCAAAAATCA	63668924	CAACTCCCTCCCCAAACTAAAAAAACCAAACGTCGCAAATTCAAAAATCG	C	Grn	G	cg	R	T	C	1	I	6	33205342	Human	GRCh38	CGATCTCTGAACCTGCGACGTTTGGCCCCCTTAGCCTGGGGAGGGAGTTG	TTCTGCTGCACATGTCTGAGGATGACTGGGACAAAGTCATAGCTGTCAACCTCAAGGTGG[CG]ATCTCTGAACCTGCGACGTTTGGCCCCCTTAGCCTGGGGAGGGAGTTGGAGGAGGGCTGT	ACAGCCCTCCTCCAACTCCCTCCCCAGGCTAAGGGGGCCAAACGTCGCAGGTTCAGAGAT[CG]CCACCTTGAGGTTGACAGCTATGACTTTGTCCCAGTCATCCTCAGACATGTGCAGCAGAA	1				chr6:33204512-33205046;chr6:33207784-33208575	S_Shore;N_Shelf						6:33171945-33173651	Promoter_Associated	TRUE		EH38D5745143	EH38E3701874|DNase-H3K4me3/CTCF-bound;EH38E3701874|Low-DNase;EH38E3701874|pELS;EH38E3701874|pELS/CTCF-bound	2;71;1;13	ReprPCWk;ReprPC;TssFlnkD;Quies;TssFlnkU;TxWk;EnhWk;TssA;EnhA2;TssFlnk;EnhA1;TssBiv;EnhBiv	579;58;141;195;544;11;34;22;6;18;36;18;1	cg01502872
cg01503555	cg01503555	0.019393	0.00442617	4.38143	1.17905e-05	0.041624	cg01503555_TC21	4718284	TACATACACATATAAACACACACCTATATATACATAAATACACATCATAC						cg	F	T	C	2	II	10	1602939	Human	GRCh38	CGCATGATGTGCATCTATGTATATACAGGTGTGTGTTCATATGTGTATGT	ACACACACTTGTACATACACATATGAACACACACCTGTATATACATAGATGCACATCATG[CG]CACACCTGTACACACATGCACACACAGACACACATCAACACGTGCACACACACCAACACA	ACACACACTTGTACATACACATATGAACACACACCTGTATATACATAGATGCACATCATG[CG]CACACCTGTACACACATGCACACACAGACACACATCAACACGTGCACACACACCAACACA	1													FALSE					Quies;ReprPC;ReprPCWk;ZNF/Rpts;Het;EnhWk;TxWk;EnhA2;TssBiv;EnhG1;EnhA1	825;99;490;73;147;8;12;5;2;1;1
cg01511567	cg01511567	-0.0603095	0.013789	-4.37372	1.22146e-05	0.0425175	cg01511567_TC21	40658175	CATCRACTCCTTTCCATAACATAAAAACTATTTTACAAAAAAACRAACAC						cg	R	T	C	2	II	11	57336157	Human	GRCh38	CGTGCCCGTTTCTCTGCAAAATAGTTTCTATGTCATGGAAAGGAGTCGAT	GTAGTTTTATTGTATCAGACTTAGTACAGGGGTGGGGTGGGGGTGTGTATTGGAATGATG[CG]TGCCCGTTTCTCTGCAAAATAGTTTCTATGTCATGGAAAGGAGTCGATGGGACAAGAAGA	TCTTCTTGTCCCATCGACTCCTTTCCATGACATAGAAACTATTTTGCAGAGAAACGGGCA[CG]CATCATTCCAATACACACCCCCACCCCACCCCTGTACTAAGTCTGATACAATAAAACTAC	1	TSS1500	SSRP1	NM_003146.3	chr11:57335367-57335956	S_Shore	TSS1500;TSS1500;TSS1500;TSS1500	ENSG00000149136.9;ENSG00000149136.9;ENSG00000149136.9;ENSG00000149136.9	ENST00000293880.9;ENST00000278412.7;ENST00000526696.6;ENST00000529002.2			11:57102138-57103954	Promoter_Associated	TRUE		EH38D4605177	EH38E2958563|Low-DNase;EH38E2958563|pELS	77;10	TssFlnkU;EnhWk;EnhA1;TssA;TssFlnkD;EnhA2;TssFlnk;TxWk;Quies	1281;33;50;141;46;51;46;4;11	cg01511567	cg01511567
cg01514916	cg01514916	-0.0395278	0.00864976	-4.56981	4.88156e-06	0.0243317	cg01514916_TC21	99636929	AATACCCAAATAAAAATATACAAACTCATTTACAACTAAAACACAACCTC						cg	F	T	C	2	II	10	62105520	Human	GRCh38	CGAGGTTGTGCTCCAGTTGTAAATGAGCCTGTACATTCCTACTTGGGTAC	CTTGTAGGGGAAGTACCCAAGTAGGAATGTACAGGCTCATTTACAACTGGAGCACAACCT[CG]CATAACACAGGCCTAGTCAAATATTAATCAATAAATGATCTGACAAATATTACACCTTAT	CTTGTAGGGGAAGTACCCAAGTAGGAATGTACAGGCTCATTTACAACTGGAGCACAACCT[CG]CATAACACAGGCCTAGTCAAATATTAATCAATAAATGATCTGACAAATATTACACCTTAT	1													FALSE		EH38D4518596	EH38E2903438|dELS;EH38E2903438|DNase-only;EH38E2903438|Low-DNase	1;1;85	Quies;EnhWk;TxWk;EnhA2;EnhA1;ReprPCWk;TssFlnkD	1505;37;91;16;9;4;1
cg01535635	cg01535635	-0.0142736	0.00312367	-4.56949	4.88917e-06	0.0243338	cg01535635_TC21	43723524	AATCAATATTTATTAAACTCTAAATCTATAATCACRAACAAATCATAAAC						cg	F	T	C	2	II	17	43011953	Human	GRCh38	CGTCCATGACTTGTTCGTGACCACAGATCTAGAGTTCAACAAACACTGAT	AGCAGGAGCTTAATCAGTGTTTGTTGAACTCTAGATCTGTGGTCACGAACAAGTCATGGA[CG]CTGCAAAGGCTCCTGCCCTTTCAAGAGCAGCTGAGATGAGGCCAGCCAAGCCCTGGGTGG	AGCAGGAGCTTAATCAGTGTTTGTTGAACTCTAGATCTGTGGTCACGAACAAGTCATGGA[CG]CTGCAAAGGCTCCTGCCCTTTCAAGAGCAGCTGAGATGAGGCCAGCCAAGCCCTGGGTGG	1						TSS200;TSS1500;TSS1500	ENSG00000068079.8;ENSG00000068079.8;ENSG00000068079.8	ENST00000538473.1;ENST00000546325.1;ENST00000534876.1					FALSE		EH38D5013559	EH38E3224594|dELS;EH38E3224594|DNase-only;EH38E3224594|Low-DNase	7;1;79	Quies;Tx;EnhA1;TxWk;EnhA2;EnhWk;EnhG1;ReprPCWk;EnhG2	340;373;52;767;45;45;31;8;2
cg01537248	cg01537248	-0.0288967	0.00585019	-4.93945	7.83443e-07	0.0078858	cg01537248_TC21	47711284	TTCTCCTACAATAAAAACTCTATAATCCTAACCCTACATAAACTTCATAC						cg	F	T	C	2	II	17	48440279	Human	GRCh38	CGTATGAAGCCTATGTAGGGCCAGGACCACAGAGCTTCCATTGCAGGAGA	ACAGGTTTAATTTCTCCTGCAATGGAAGCTCTGTGGTCCTGGCCCTACATAGGCTTCATA[CG]TTGACAGACAACCTGTTTATCTCCACCAGGGCAGCTCTACATATGGCAGTTCCCTCTGCC	ACAGGTTTAATTTCTCCTGCAATGGAAGCTCTGTGGTCCTGGCCCTACATAGGCTTCATA[CG]TTGACAGACAACCTGTTTATCTCCACCAGGGCAGCTCTACATATGGCAGTTCCCTCTGCC	1									chr17:48440074-48440409		17:46517331-46517755	Unclassified	TRUE		EH38D5019202	EH38E3228339|dELS;EH38E3228339|DNase-only;EH38E3228339|Low-DNase	6;6;75	EnhWk;Quies;TxWk;ReprPCWk;EnhA1;EnhA2;ReprPC;TssFlnkU;EnhBiv	227;261;629;186;226;76;43;12;3
cg01538392	cg01538392	-0.042309	0.00785414	-5.38684	7.17072e-08	0.00189889	cg01538392_BC21	85724820	CACCACCATACCACTAACTAACATATATTAACACACTTACTATATACCAC						cg	R	B	C	2	II	20	34703421	Human	GRCh38	ACCACCATACCACTAGCTGACATGTATTGGCACACTTACTGTGTGCCACG	GGGACAATATCTACCTTTTGGGTTGTTGTGAAGATAAAAAAACACACCCATAGCACAGGT[CG]TGGCACACAGTAAGTGTGCCAATACATGTCAGCTAGTGGTATGGTGGTGCAATAGTAGGT	GGGACAATATCTACCTTTTGGGTTGTTGTGAAGATAAAAAAACACACCCATAGCACAGGT[CG]TGGCACACAGTAAGTGTGCCAATACATGTCAGCTAGTGGTATGGTGGTGCAATAGTAGGT	1	TSS1500;TSS1500;TSS1500;TSS1500	TP53INP2;TP53INP2;TP53INP2;TP53INP2	NM_001329431.2;NM_001329430.2;NM_001329429.2;NM_021202.3	chr20:34704011-34704764	N_Shore	TSS1500;TSS1500;TSS1500;TSS1500	ENSG00000078804.13;ENSG00000078804.13;ENSG00000078804.13;ENSG00000078804.13	ENST00000374809.6;ENST00000374810.8;ENST00000451665.5;ENST00000414082.1					FALSE					Quies;TssFlnkD;TssBiv;TssFlnkU;ReprPCWk;TssFlnk;TxWk;EnhWk;TssA;EnhA2;EnhA1;EnhBiv;Tx;ReprPC	548;248;244;192;154;51;119;52;21;19;9;3;1;2	cg01538392
cg01539577	cg01539577	-0.0420711	0.00923858	-4.55385	5.2672e-06	0.0254144	cg01539577_TC21	72657291	CTTACTCAAACTTCACAATCAAAATAAATTCTACTTCTCACTTAAAACCC						cg	F	T	C	2	II	5	126748385	Human	GRCh38	CGGGCCTCAAGTGAGAAGTAGAACCTACTCTGACTGTGAAGCCTGAGCAA	TGTGTCTGACTCTTGCTCAGGCTTCACAGTCAGAGTAGGTTCTACTTCTCACTTGAGGCC[CG]CCCCCAGATCCCCAGCCCACCAGGATTTCCCTTCAGTGGCGCTTGCATTGAAGGCTACTT	TGTGTCTGACTCTTGCTCAGGCTTCACAGTCAGAGTAGGTTCTACTTCTCACTTGAGGCC[CG]CCCCCAGATCCCCAGCCCACCAGGATTTCCCTTCAGTGGCGCTTGCATTGAAGGCTACTT	1											5:126083608-126084238	Unclassified	TRUE		EH38D5681826	EH38E3658557|CTCF-only/CTCF-bound;EH38E3658557|dELS;EH38E3658557|dELS/CTCF-bound;EH38E3658557|DNase-only;EH38E3658557|Low-DNase	3;4;5;11;64	Quies;ReprPCWk;EnhA1;TssFlnkU;EnhWk;TssFlnkD;TxWk;Tx;TssA;TssFlnk;EnhA2;Het	1290;40;85;55;104;13;48;3;5;5;14;1
cg01542384	cg01542384	-0.0296798	0.00633194	-4.68732	2.76803e-06	0.0171515	cg01542384_TC21	7676226	ACATAACCTAAAACAAAAATCAAAACTACTAACTCCTCTATTAACTTTCC						cg	R	T	C	2	II	3	50246873	Human	GRCh38	CGGAAAGCCAACAGAGGAGCCAGTAGCTCTGACTCCTGTCCCAGGTTATG	GGAAGGAGGCCCCAGCTGTGTAGGAGTGCCGGGTTATACTGAAGGGAAGTGACGACACAG[CG]GAAAGCCAACAGAGGAGCCAGTAGCTCTGACTCCTGTCCCAGGTTATGCTGAGTCCCAGC	GCTGGGACTCAGCATAACCTGGGACAGGAGTCAGAGCTACTGGCTCCTCTGTTGGCTTTC[CG]CTGTGTCGTCACTTCCCTTCAGTATAACCCGGCACTCCTACACAGCTGGGGCCTCCTTCC	1	TSS200	GNAI2	NM_001166425.2			TSS200	ENSG00000114353.17	ENST00000451956.1			3:50283228-50284481	Promoter_Associated	TRUE		EH38D3426073	EH38E2200967|Low-DNase;EH38E2200967|pELS;EH38E2200967|pELS/CTCF-bound;EH38E2200967|PLS;EH38E2200967|PLS/CTCF-bound	29;3;8;8;39	ReprPCWk;EnhA1;Quies;TssFlnkU;EnhG2;EnhA2;TxWk;TssA;ReprPC;EnhWk;Het	431;513;238;221;18;74;69;11;54;33;1	cg01542384
cg01550884	cg01550884	-0.0411864	0.00830987	-4.95632	7.18392e-07	0.00755608	cg01550884_TC21	12675375	TAAATAAATTCTATAACTCCTCTCCTTCTCAATCTCTCRTCTATAAAATC						cg	F	T	C	2	II	5	176542178	Human	GRCh38	CGATTTTACAGACGAGAGATTGAGAAGGAGAGGAGCCATAGAACTCACCC	TTTTGAGACCTTGGGTGAGTTCTATGGCTCCTCTCCTTCTCAATCTCTCGTCTGTAAAAT[CG]GGTGATCGATAATAACTAGGCCACTGGGGCGAAAGGACTACACTGAGGGGTGAGACAGAG	TTTTGAGACCTTGGGTGAGTTCTATGGCTCCTCTCCTTCTCAATCTCTCGTCTGTAAAAT[CG]GGTGATCGATAATAACTAGGCCACTGGGGCGAAAGGACTACACTGAGGGGTGAGACAGAG	1	TSS1500	CDHR2	NM_001171976.2	chr5:176542748-176544052	N_Shore	TSS1500;TSS1500	ENSG00000074276.11;ENSG00000074276.11	ENST00000510636.5;ENST00000510124.5		5:176542043-176543516			FALSE		EH38D5715596	EH38E3681103|Low-DNase;EH38E3681103|pELS	79;8	TxWk;EnhA1;Quies;TssFlnkU;EnhA2;TssA;TssFlnk;EnhWk;TssFlnkD;EnhBiv;ReprPCWk;TssBiv;ReprPC;EnhG2	445;315;319;335;57;10;8;125;22;5;15;1;3;3
cg01565936	cg01565936	-0.028523	0.00564253	-5.055	4.30394e-07	0.00566227	cg01565936_BC21	42642391	AAAATCTAAACCTAATCCAAAACTATTTCCACTAATATTTCACACATTCC						cg	F	B	C	2	II	13	46380502	Human	GRCh38	AAGTCTGAACCTGATCCAAAGCTGTTTCCACTGGTATTTCACACATTCCG	GGACAAAAACAAAAGTCTGAACCTGATCCAAAGCTGTTTCCACTGGTATTTCACACATTC[CG]TGTGGGCTGAAATTAGCAGGCTATTTTCAATTTCATTAGCAAAGTAATTTTAAGAACTTT	AAAGTTCTTAAAATTACTTTGCTAATGAAATTGAAAATAGCCTGCTAATTTCAGCCCACA[CG]GAATGTGTGAAATACCAGTGGAAACAGCTTTGGATCAGGTTCAGACTTTTGTTTTTGTCC	1													FALSE		EH38D4765209	EH38E3064906|dELS;EH38E3064906|Low-DNase	1;86	Quies;ReprPCWk;TxWk;TssFlnkU;EnhA1;EnhWk;Het;EnhA2;Tx;EnhG2;ReprPC;EnhG1	1412;108;86;5;22;5;5;14;1;3;1;1
cg01573661	cg01573661	-0.0239844	0.00553151	-4.33595	1.45129e-05	0.0468032	cg01573661_BC21	56733298	TAAATACTCAATCCACTCTCAAAATACCTAAAACAAATATTCTCTCCAAC						cg	R	B	C	2	II	12	21666800	Human	GRCh38	AAATGCTCAATCCACTCTCAGAATGCCTGAGGCAAATGTTCTCTCCAACG	CCTAGGTTTTTAGGCAATATCAGTGGACTCAGGAGTTTATTTTACTTTTAGAGTAGAAAA[CG]TTGGAGAGAACATTTGCCTCAGGCATTCTGAGAGTGGATTGAGCATTTACGTTAATTATT	CCTAGGTTTTTAGGCAATATCAGTGGACTCAGGAGTTTATTTTACTTTTAGAGTAGAAAA[CG]TTGGAGAGAACATTTGCCTCAGGCATTCTGAGAGTGGATTGAGCATTTACGTTAATTATT	1													FALSE		EH38D2537568			TxWk;Quies;Tx;EnhA2;ReprPCWk;TssFlnkD;EnhA1;EnhWk;EnhG1	418;761;385;45;55;1;9;7;1
cg01578576	cg01578576	-0.0363583	0.00815875	-4.45635	8.33672e-06	0.0336798	cg01578576_BC21	90809578	ACACAAATATCCACTCTACTTTCACTTTTTTAAAATATATACCTAAAAAC						cg	F	B	C	2	II	5	173204532	Human	GRCh38	CACAAATATCCACTCTGCTTTCACTTTTTTGGGGTATATACCTAGAAGCG	TTAATCTTGGTGCACAAATATCCACTCTGCTTTCACTTTTTTGGGGTATATACCTAGAAG[CG]GAATTGCTGGATCTTATGGCAATTGTATGTCATTTTTTTTTGAGGAATTGTCATAACTTT	AAAGTTATGACAATTCCTCAAAAAAAAATGACATACAATTGCCATAAGATCCAGCAATTC[CG]CTTCTAGGTATATACCCCAAAAAAGTGAAAGCAGAGTGGATATTTGTGCACCAAGATTAA	1											5:172631260-172631607	Unclassified_Cell_type_specific	TRUE		EH38D5712913	EH38E3679332|CTCF-only/CTCF-bound;EH38E3679332|DNase-H3K4me3/CTCF-bound;EH38E3679332|Low-DNase	15;1;71	TxWk;ReprPCWk;Quies;ReprPC;EnhA2;EnhWk;EnhA1;Het;TssFlnk;TssFlnkU	266;755;521;35;32;31;19;2;1;1
cg01583646	cg01583646	-0.0413391	0.00883877	-4.67702	2.9108e-06	0.0177221	cg01583646_TC21	59809342	AAATCTAATTTCCTATTTCTCTTTTTCCAACCAATTTCCAAATAAAACTC						cg	R	T	C	2	II	15	43284221	Human	GRCh38	CGAGTCTTATCTGGAAACTGGCTGGAAAAAGAGAAACAGGAAACCAGATT	TGCACTCCAGCCTGGGCAACAGAGCGAGACTCCATCTCAAAAACAAACAAACCAACACAG[CG]AGTCTTATCTGGAAACTGGCTGGAAAAAGAGAAACAGGAAACCAGATTTGCGGGTAGAGC	GCTCTACCCGCAAATCTGGTTTCCTGTTTCTCTTTTTCCAGCCAGTTTCCAGATAAGACT[CG]CTGTGTTGGTTTGTTTGTTTTTGAGATGGAGTCTCGCTCTGTTGCCCAGGCTGGAGTGCA	1													FALSE					TxWk;Quies;ReprPCWk;ReprPC;EnhWk;Tx;EnhA2;TssFlnkU;Het;EnhA1;EnhBiv	766;385;436;17;43;10;2;1;1;1;1
cg01586640	cg01586640	-0.0510785	0.00998646	-5.11478	3.14107e-07	0.00474826	cg01586640_BC21	61614404	AAATTACTCTAAACATATAATCCAAAACAAAATAAACCTACAATCCTTTC						cg	F	B	C	2	II	12	49017876	Human	GRCh38	AATTACTCTGGGCATGTAATCCAAAGCAAAGTGAACCTGCAGTCCTTTCG	GGTGTGGCAAAGAATTACTCTGGGCATGTAATCCAAAGCAAAGTGAACCTGCAGTCCTTT[CG]TAACTACAGTAGCAGATGATAAAAACCAAGATGGAAAGAGTTACTCTGCCTGAAAGAAGA	TCTTCTTTCAGGCAGAGTAACTCTTTCCATCTTGGTTTTTATCATCTGCTACTGTAGTTA[CG]AAAGGACTGCAGGTTCACTTTGCTTTGGATTACATGCCCAGAGTAATTCTTTGCCACACC	1				chr12:49018516-49018973	N_Shore	exon_2;TSS1500	DDN-AS1;ENSG00000257913.4	ENST00000547866.1;ENST00000691225.1			12:49411493-49413178	Promoter_Associated	TRUE					Quies;ReprPC;TssFlnkU;ReprPCWk;TssA;Het;TssFlnk;TxWk;EnhA2;TssFlnkD;EnhA1;EnhWk;ZNF/Rpts	622;2;637;192;79;12;33;4;6;54;12;9;1
cg01602822	cg01602822	-0.0478678	0.00822809	-5.81761	5.96964e-09	0.000469394	cg01602822_BC21	9726139	ATACTTCCAAATACTAACTCCATAATAACCCAAATACTTACCTAAAAAAC						cg	R	B	C	2	II	3	56917889	Human	GRCh38	TGCTTCCAGGTGCTAGCTCCATGGTGACCCAGATGCTTGCCTGAAAGGCG	TGTGAGGGAATCACACCTGCTTAGAGAAAGGAGGAAGTGAAATCACTGTAAAAAGCCTTA[CG]CCTTTCAGGCAAGCATCTGGGTCACCATGGAGCTAGCACCTGGAAGCACTCGGTAATGAG	TGTGAGGGAATCACACCTGCTTAGAGAAAGGAGGAAGTGAAATCACTGTAAAAAGCCTTA[CG]CCTTTCAGGCAAGCATCTGGGTCACCATGGAGCTAGCACCTGGAAGCACTCGGTAATGAG	1	TSS1500	ARHGEF3	NM_001289698.2			TSS1500	ENSG00000163947.12	ENST00000496106.5			3:56951756-56951955	Unclassified_Cell_type_specific	TRUE		EH38D3432249	EH38E2205191|Low-DNase;EH38E2205191|pELS	80;7	Quies;ReprPCWk;TxWk;TssFlnkU;EnhA1;EnhA2;EnhWk;ReprPC;TssA;TssFlnkD	977;52;239;35;169;63;119;4;4;1
cg01611115	cg01611115	-0.0563323	0.0119547	-4.71214	2.45126e-06	0.0158874	cg01611115_TC21	33754506	ATAAAATAACCTAATCATAAAAATTCCCCAAACACCTCAATAACTACAAC						cg	R	T	C	2	II	18	2978835	Human	GRCh38	CGTTGCAGTCACTGAGGTGCTTGGGGAATCCTCATGATCAGGCCACCCCA	CAGTGATGAGTCAGATGTGGGCATCATCGTCCTTGGGGCTCACTTCTCACCCCCGGTGCA[CG]TTGCAGTCACTGAGGTGCTTGGGGAATCCTCATGATCAGGCCACCCCATCTGCAGATTCT	AGAATCTGCAGATGGGGTGGCCTGATCATGAGGATTCCCCAAGCACCTCAGTGACTGCAA[CG]TGCACCGGGGGTGAGAAGTGAGCCCCAAGGACGATGATGCCCACATCTGACTCATCACTG	1													FALSE		EH38D5055209	EH38E3253890|dELS;EH38E3253890|DNase-only;EH38E3253890|Low-DNase	15;3;69	EnhA1;EnhWk;EnhA2;Quies;TssFlnkU;TxWk;TssFlnkD;TssA;TssFlnk;EnhG1;EnhG2	874;98;137;120;334;82;8;2;2;2;4
cg01612601	cg01612601	-0.0375989	0.00663752	-5.66461	1.47361e-08	0.000774471	cg01612601_BC21	19604291	AAAAATATATCRCRTACCTCCTTTATACCAAAATAATCTACACACTACAC						cg	R	B	C	2	II	11	45593962	Human	GRCh38	GAGGTGTGTCGCGTGCCTCCTTTGTGCCAGAATGGTCTGCACACTGCACG	CTCGTCTGGAGCATGAGAGTCAAGCTCTTACCTCATGGAGATATTAAATAAGATAACGTA[CG]TGCAGTGTGCAGACCATTCTGGCACAAAGGAGGCACGCGACACACCTCTATTTCCTTCCT	CTCGTCTGGAGCATGAGAGTCAAGCTCTTACCTCATGGAGATATTAAATAAGATAACGTA[CG]TGCAGTGTGCAGACCATTCTGGCACAAAGGAGGCACGCGACACACCTCTATTTCCTTCCT	1													FALSE					Quies;ReprPCWk;EnhA2;ReprPC;TxWk;ZNF/Rpts;Het;EnhWk	595;959;9;89;3;1;5;2
cg01616446	cg01616446	-0.0110871	0.00205355	-5.39902	6.70055e-08	0.0018076	cg01616446_BC21	70735594	TAACCTTTAATTCCTTCTTAAAAAACTCTATCTTCAACTACTTTCAAAAC						cg	R	B	C	2	II	6	43228977	Human	GRCh38	GACCTTTGGTTCCTTCTTGGAGAACTCTGTCTTCAGCTGCTTTCAGAGCG	GTGGGAACTGAGCCCAAGCAAAGCAGCCCAATCTACCTTCTTTCTGTTGCACCCTACAAA[CG]CTCTGAAAGCAGCTGAAGACAGAGTTCTCCAAGAAGGAACCAAAGGTCAAGATAATGCTG	GTGGGAACTGAGCCCAAGCAAAGCAGCCCAATCTACCTTCTTTCTGTTGCACCCTACAAA[CG]CTCTGAAAGCAGCTGAAGACAGAGTTCTCCAAGAAGGAACCAAAGGTCAAGATAATGCTG	1				chr6:43229073-43229602	N_Shore						6:43196516-43197701	Promoter_Associated	TRUE		EH38D5755196	EH38E3708917|DNase-H3K4me3;EH38E3708917|DNase-H3K4me3/CTCF-bound;EH38E3708917|Low-DNase;EH38E3708917|pELS;EH38E3708917|pELS/CTCF-bound	3;1;62;18;3	Quies;ReprPCWk;TssA;TssFlnk;TssFlnkU;TssFlnkD;Tx;TxWk;EnhA2;ReprPC;EnhWk;EnhA1;TssBiv;Het	460;291;278;230;259;51;13;51;15;2;7;3;2;1	cg01616446
cg01630417	cg01630417	-0.036711	0.00841712	-4.36147	1.29191e-05	0.0439332	cg01630417_BC21	45790456	CTTCCTACAACTATTCCAATCATCTACTCTAATATAACAACAAAATCCCC						cg	F	B	C	2	II	12	50233131	Human	GRCh38	TTCCTGCAGCTATTCCAGTCATCTGCTCTGATATAACAACAAGATCCCCG	AGCAGACCTCACTTCCTGCAGCTATTCCAGTCATCTGCTCTGATATAACAACAAGATCCC[CG]TGGATAAGGTCAAATGCTGAAACAATTGGATAGAGCAGAAAGTCTAGGCTTTAAGCCCCA	TGGGGCTTAAAGCCTAGACTTTCTGCTCTATCCAATTGTTTCAGCATTTGACCTTATCCA[CG]GGGATCTTGTTGTTATATCAGAGCAGATGACTGGAATAGCTGCAGGAAGTGAGGTCTGCT	1													FALSE		EH38D2557487	EH38E1610836|DNase-only;EH38E1610836|Low-DNase;EH38E1610836|pELS	2;81;4	Quies;TxWk;EnhWk;Het;EnhA2;Tx;TssFlnk;ReprPCWk;EnhA1;EnhG1	1321;260;59;1;12;3;1;1;4;1
cg01635117	cg01635117	-0.0461619	0.00862862	-5.34986	8.8022e-08	0.00214378	cg01635117_BC21	70798222	AAATAAATACAAAAACRAATATACAATACTCTACTTTCTCATACACRCAC						cg	R	B	C	2	II	13	106859784	Human	GRCh38	GGTAAATACAAGAGCGAGTGTACAGTACTCTGCTTTCTCATACACGCACG	CAACTGCTTCAGGAGATTCCTTCATTTTAGAAAAGGCCCTGGAAATCCTCAGCCTAACCA[CG]TGCGTGTATGAGAAAGCAGAGTACTGTACACTCGCTCTTGTATTTACCTCCTGAGGCAAT	CAACTGCTTCAGGAGATTCCTTCATTTTAGAAAAGGCCCTGGAAATCCTCAGCCTAACCA[CG]TGCGTGTATGAGAAAGCAGAGTACTGTACACTCGCTCTTGTATTTACCTCCTGAGGCAAT	1													FALSE		EH38D4790995	EH38E3080144|dELS;EH38E3080144|DNase-only;EH38E3080144|Low-DNase	3;1;83	Quies;EnhA1;EnhWk;ReprPCWk;EnhA2;TxWk;TssFlnkD;Het	1488;62;12;14;69;15;1;2
cg01636591	cg01636591	-0.0306959	0.00680884	-4.50825	6.53654e-06	0.0292466	cg01636591_TC21	53769971	CCTCCTATTACCCACAAAAAAATAAACCCTTAACTCTCTTCCACTATAAC						cg	F	T	C	2	II	17	34319137	Human	GRCh38	CGTCATAGTGGAAGAGAGCCAAGGGCCTACCCCTCTGTGGGTAACAGGAG	CCCATCCCTGGCCTCCTGTTACCCACAGAGGGGTAGGCCCTTGGCTCTCTTCCACTATGA[CG]TCAGCTTCCATTCTTCCTTTCTTATAGACAATTTTCCATTTCAAGGAAATCAGAGCCCTT	CCCATCCCTGGCCTCCTGTTACCCACAGAGGGGTAGGCCCTTGGCTCTCTTCCACTATGA[CG]TCAGCTTCCATTCTTCCTTTCTTATAGACAATTTTCCATTTCAAGGAAATCAGAGCCCTT	1	TSS1500	CCL8	NM_005623.3			TSS1500	ENSG00000108700.5	ENST00000394620.2					FALSE		EH38D5004969			Quies;ReprPCWk;EnhA1;Het;ReprPC;EnhA2;EnhWk;EnhBiv;TxWk;Tx;EnhG2;EnhG1	1323;148;12;76;5;27;26;1;39;2;2;2	cg01636591	cg01636591
cg01637169	cg01637169	-0.0378226	0.00770717	-4.90745	9.22664e-07	0.00871402	cg01637169_TC21	88785412	ACAATCACACATCTACAATCACACATCTACAATACAAACTACAAATCAAC						cg	F	T	C	2	II	3	13417781	Human	GRCh38	CGTTGATCTGTAGTTTGTATTGCAGATGTGTGACTGCAGATGTGTGACTG	CACTTTGAATAGCAGTCACACATCTGCAGTCACACATCTGCAATACAAACTACAGATCAA[CG]CCAAACACGTTATAAGGTACTTAGCACTTCTCTGATGCATCAGAGATTAAGAATGTTTTT	CACTTTGAATAGCAGTCACACATCTGCAGTCACACATCTGCAATACAAACTACAGATCAA[CG]CCAAACACGTTATAAGGTACTTAGCACTTCTCTGATGCATCAGAGATTAAGAATGTTTTT	1				chr3:13419470-13420646	N_Shore								FALSE		EH38D5428148	EH38E3497074|dELS;EH38E3497074|Low-DNase	1;86	TxWk;Tx;ReprPCWk;TssFlnkU;Quies;EnhA1;ReprPC;EnhWk;EnhG2;EnhG1;TssA;EnhA2;EnhBiv;TssFlnkD	333;207;297;49;564;86;25;68;13;6;5;7;1;2	cg01637169
cg01642550	cg01642550	-0.0497588	0.0102999	-4.83098	1.3586e-06	0.0109054	cg01642550_BC21	62666294	CCTATAACTAAAATAATCCTCCTAAAACCTACCTTACTAAAATTATCAAC						cg	F	B	C	2	II	16	89031919	Human	GRCh38	CTGTGGCTAGGATAGTCCTCCTGAGACCTGCCTTACTGGGGTTGTCAGCG	GCAATCCTTAGCCTGTGGCTAGGATAGTCCTCCTGAGACCTGCCTTACTGGGGTTGTCAG[CG]AGGTCTTTCCACTCAAGCTGTTTGGGTCACACAGTGTCTTCCAGCACTGTTTTACCTCCA	TGGAGGTAAAACAGTGCTGGAAGACACTGTGTGACCCAAACAGCTTGAGTGGAAAGACCT[CG]CTGACAACCCCAGTAAGGCAGGTCTCAGGAGGACTATCCTAGCCACAGGCTAAGGATTGC	1											16:89098192-89098955	Unclassified_Cell_type_specific	TRUE					ReprPCWk;Tx;Quies;TssFlnkU;EnhWk;EnhA1;ZNF/Rpts;ReprPC;TxWk;Het;TssA;TssFlnkD;EnhA2;TssFlnk;EnhBiv;EnhG1	801;1;284;75;50;55;98;150;55;63;1;14;9;1;4;2	cg01642550
cg01647734	cg01647734	-0.0276171	0.00602195	-4.58608	4.51654e-06	0.0233461	cg01647734_TC21	48621407	ATCRCCTAATAACATCATAACTACCTTAACATCATAATACAATACATTAC						cg	F	T	C	2	II	11	100851463	Human	GRCh38	CGTAATGTATTGCACTATGATGTTAAGGCAGCTATGATGTCATTAGGCGA	AAACAATTCCTATCGCCTAATGACATCATAGCTGCCTTAACATCATAGTGCAATACATTA[CG]TGTTTCTGGTGATGCCAGTGCAAACAAATCTGTGCTGCCCATCTGTGGAAGTATGGCACA	AAACAATTCCTATCGCCTAATGACATCATAGCTGCCTTAACATCATAGTGCAATACATTA[CG]TGTTTCTGGTGATGCCAGTGCAAACAAATCTGTGCTGCCCATCTGTGGAAGTATGGCACA	1													FALSE		EH38D2488857	EH38E1564422|dELS;EH38E1564422|DNase-only;EH38E1564422|Low-DNase	3;7;77	Quies;TxWk;EnhWk;EnhA2;TssFlnkD;EnhA1;ReprPCWk;Tx;ReprPC	1428;157;25;18;1;16;13;4;1
cg01650991	cg01650991	-0.060824	0.0126481	-4.80896	1.51714e-06	0.0116412	cg01650991_TC21	58624243	TCTACTTCCATTACAACCAAAAACTCCRAAAAATTATACAATCAAAATTC						cg	R	T	C	2	II	2	185739231	Human	GRCh38	CGAACCCTGATTGTATAATTCTTCGGAGTCTTTGGTTGCAATGGAAGTAG	CAGGCGCGGGACGCCAGGAGAGCTGGTGACCAGGGAAAACGGGAGGACTTCAGGATGCCC[CG]AACCCTGATTGTATAATTCTTCGGAGTCTTTGGTTGCAATGGAAGTAGATTGGTCTAAAC	GTTTAGACCAATCTACTTCCATTGCAACCAAAGACTCCGAAGAATTATACAATCAGGGTT[CG]GGGCATCCTGAAGTCCTCCCGTTTTCCCTGGTCACCAGCTCTCCTGGCGTCCCGCGCCTG	1	TSS1500;TSS1500;TSS200	FSIP2-AS2;FSIP2-AS2;FSIP2-AS2	NR_110216.1;NR_110215.1;NR_110214.1	chr2:185738665-185739183	S_Shore	TSS1500;TSS1500;TSS200	ENSG00000226747.6;ENSG00000226747.6;ENSG00000188738.16	ENST00000421998.5;ENST00000437717.1;ENST00000465275.1					FALSE		EH38D5263033	EH38E3389193|CTCF-only/CTCF-bound;EH38E3389193|DNase-H3K4me3;EH38E3389193|DNase-H3K4me3/CTCF-bound;EH38E3389193|DNase-only;EH38E3389193|Low-DNase;EH38E3389193|pELS/CTCF-bound	7;1;32;1;45;1	Quies;TssFlnk;TssBiv;ZNF/Rpts;ReprPCWk;TssA;TxWk;Het;TssFlnkD;ReprPC;EnhWk;EnhBiv;EnhA2	977;377;32;164;19;17;6;25;10;17;15;3;1
cg01667702	cg01667702	-0.0650907	0.0122968	-5.2933	1.20129e-07	0.00266379	cg01667702_BC21	60683425	TTCTTTTCCAATCCRACTAACAAACTTCRACTCAATTCTTAAACRAAACC						cg	R	B	C	2	II	17	7933286	Human	GRCh38	TCTTTTCCAATCCGACTGACAAGCTTCGACTCAATTCTTGGGCGAAGCCG	GGCCACGGCCCGAGCCCAGCTGTATTTACCCTCCACCTCCCCGCCTCATGAAGGGTTAGA[CG]GCTTCGCCCAAGAATTGAGTCGAAGCTTGTCAGTCGGATTGGAAAAGAACTTGAAGAAAA	GGCCACGGCCCGAGCCCAGCTGTATTTACCCTCCACCTCCCCGCCTCATGAAGGGTTAGA[CG]GCTTCGCCCAAGAATTGAGTCGAAGCTTGTCAGTCGGATTGGAAAAGAACTTGAAGAAAA	1	exon_1;exon_1;exon_1;exon_2;5UTR;exon_2;5UTR;exon_1;exon_2;exon_2;exon_2;exon_2;exon_1;TSS1500;TSS1500;TSS1500;TSS1500	CNTROB;CNTROB;CNTROB;CNTROB;CNTROB;CNTROB;CNTROB;CNTROB;CNTROB;CNTROB;CNTROB;CNTROB;CNTROB;TRAPPC1;TRAPPC1;TRAPPC1;TRAPPC1	NM_001037144.7;NM_001330124.3;NM_001353202.2;NM_001353203.2;NM_001353204.2;NM_001353204.2;NM_001353205.2;NM_001353205.2;NM_001353206.2;NM_001353207.1;NM_001353208.2;NM_001353209.1;NM_053051.5;NM_021210.5;NM_001166621.1;NR_030684.2;NR_030697.1	chr17:7929214-7929846;chr17:7931853-7932251	S_Shelf;S_Shore	exon_2;exon_1;exon_1;exon_2;exon_2;exon_1;exon_1;5UTR;TSS1500;TSS1500;TSS1500;TSS1500;TSS1500;TSS1500;TSS1500;TSS1500	CNTROB;CNTROB;CNTROB;CNTROB;CNTROB;CNTROB;CNTROB;CNTROB;ENSG00000170043.12;ENSG00000170043.12;ENSG00000170043.12;ENSG00000170043.12;ENSG00000170043.12;ENSG00000170043.12;ENSG00000170043.12;ENSG00000170037.14	ENST00000576538.5;ENST00000380262.7;ENST00000563694.6;ENST00000570784.1;ENST00000575408.5;ENST00000565740.5;ENST00000571540.5;ENST00000575408.5;ENST00000540486.5;ENST00000571739.5;ENST00000303731.9;ENST00000575639.1;ENST00000571947.5;ENST00000572656.2;ENST00000573989.1;ENST00000571632.5			17:7834710-7836807	Promoter_Associated	TRUE		EH38D2906459	EH38E1844815|Low-DNase;EH38E1844815|PLS;EH38E1844815|PLS/CTCF-bound	33;24;30	ReprPCWk;TssFlnkU;TssFlnk;EnhWk;Quies;TssFlnkD;TxWk;TssA;ReprPC;TssBiv;EnhA1;Het;EnhA2;EnhBiv	608;345;84;47;203;323;19;15;9;4;2;2;1;1	cg01667702	cg01667702
cg01680844	cg01680844	-0.0392156	0.00809371	-4.84519	1.26489e-06	0.0104057	cg01680844_TC21	57713855	TAAATACRTTACCAAAACCTCTATTAATCCCAAATAACTCCCAAAACACC						cg	F	T	C	2	II	16	726501	Human	GRCh38	CGGTGCCCTGGGAGTCACCTGGGACCAACAGAGGCCTTGGCAACGCACTT	ACTGGCACTGCTAAGTGCGTTGCCAAGGCCTCTGTTGGTCCCAGGTGACTCCCAGGGCAC[CG]CCCACAGGGGCCGGCCAGACCGGTGGTTGCTGAGGAGGGAGGATAGCTCTTCCTCTCTCC	ACTGGCACTGCTAAGTGCGTTGCCAAGGCCTCTGTTGGTCCCAGGTGACTCCCAGGGCAC[CG]CCCACAGGGGCCGGCCAGACCGGTGGTTGCTGAGGAGGGAGGATAGCTCTTCCTCTCTCC	1	TSS1500;TSS1500;TSS1500;TSS1500;TSS1500;TSS1500;TSS200;TSS200;TSS200;TSS200;TSS200;TSS200	HAGHL;HAGHL;HAGHL;HAGHL;HAGHL;HAGHL;CCDC78;CCDC78;CCDC78;CCDC78;CCDC78;CCDC78	NM_001365282.1;NM_001290137.2;NM_001290139.2;NM_001323636.2;NM_001323635.2;NM_032304.4;NM_001378030.1;NM_001031737.3;NM_001378031.1;NR_165382.1;NR_165385.1;NR_165386.1	chr16:726636-729417	N_Shore	TSS200;TSS200;TSS200;TSS200;TSS200;TSS200;TSS200;TSS200;TSS200;TSS200;TSS200;TSS1500;TSS200;TSS1500;TSS1500;TSS1500;TSS1500;TSS1500;TSS1500;TSS1500;TSS1500;TSS1500;TSS1500;TSS1500;TSS1500;TSS1500;TSS1500;TSS1500	ENSG00000162004.19;ENSG00000162004.19;ENSG00000162004.19;ENSG00000162004.19;ENSG00000162004.19;ENSG00000162004.19;ENSG00000162004.19;ENSG00000162004.19;ENSG00000162004.19;ENSG00000162004.19;ENSG00000162004.19;ENSG00000162004.19;ENSG00000162004.19;ENSG00000103253.19;ENSG00000103253.19;ENSG00000103253.19;ENSG00000103253.19;ENSG00000103253.19;ENSG00000103253.19;ENSG00000103253.19;ENSG00000103253.19;…	ENST00000485091.5;ENST00000463539.5;ENST00000345165.10;ENST00000482878.5;ENST00000293889.10;ENST00000478979.5;ENST00000481804.5;ENST00000682391.1;ENST00000538176.5;ENST00000439619.6;ENST00000460023.5;ENST00000544996.1;ENST00000650995.1;ENST00000549114.5;ENST00000341413.8;ENST00000562187.1;ENST00000564537.5;ENST00000389703.8;ENST00000562141.5;ENST00000561546.5;ENST00000564545.1;ENST00000561750.1;E…					FALSE		EH38D4915106	EH38E3160881|DNase-only;EH38E3160881|Low-DNase;EH38E3160881|PLS	11;53;23	EnhBiv;EnhWk;ReprPC;TxWk;TssBiv;TssFlnkD;TssFlnkU;EnhA2;Quies;TssA;EnhA1;ReprPCWk;TssFlnk;EnhG2;EnhG1;ZNF/Rpts	380;193;399;179;159;54;88;16;63;3;59;41;25;2;1;1	cg01680844
cg01682506	cg01682506	0.0141954	0.00300721	4.72046	2.35312e-06	0.0155805	cg01682506_TC11	4788256	CTTCCTACAAAAAAACAAAATAAACTCTAACTAACACTAAACAACAACCA	15602489	CTTCCTACAAAAAAACGAAATAAACTCTAACTAACGCTAAACGACAACCG	A	Red	R	cg	R	T	C	1	I	14	76956500	Human	GRCh38	CGGCTGCCGCCCAGCGCCAGCCAGAGCCCACCCCGCCTCCCTGCAGGAAG	GGCCACCCCCTCCTCTTGCTCCCCTCCCCTCCCCGGGTCCAGCCCCTCCCCTGCCTGGCC[CG]GCTGCCGCCCAGCGCCAGCCAGAGCCCACCCCGCCTCCCTGCAGGAAGCCGGCTGGCGGC	GCCGCCAGCCGGCTTCCTGCAGGGAGGCGGGGTGGGCTCTGGCTGGCGCTGGGCGGCAGC[CG]GGCCAGGCAGGGGAGGGGCTGGACCCGGGGAGGGGAGGGGAGCAAGAGGAGGGGGTGGCC	1				chr14:76956499-76956751	Island						14:77422079-77424026	Promoter_Associated	TRUE		EH38D2740201	EH38E1729713|dELS;EH38E1729713|dELS/CTCF-bound;EH38E1729713|DNase-H3K4me3;EH38E1729713|DNase-only;EH38E1729713|Low-DNase	43;40;1;1;2	Quies;TxWk;TssA;EnhA1;TssFlnkU;ReprPCWk;EnhA2;TssFlnk;EnhWk;TssFlnkD;TssBiv;Het;ReprPC	676;19;425;40;317;122;36;10;9;6;1;1;1	cg01682506
cg01692572	cg01692572	-0.0251094	0.00491123	-5.11266	3.17654e-07	0.00476635	cg01692572_BC21	11624948	CCTAAAACRCCCAACAAATAACACCCTAAATAAAAACTAACTTCTAATAC						cg	F	B	C	2	II	8	143828617	Human	GRCh38	CTAGGGCGCCCAGCAAATGGCACCCTGGGTGGGAACTGGCTTCTGGTGCG	CCACGCAGCTCCCTAGGGCGCCCAGCAAATGGCACCCTGGGTGGGAACTGGCTTCTGGTG[CG]CACTAGACCTCCAACTGCCTGTCTGGTTCCCCACTGCGTCCCCAGATCCTCCCGCAGAGC	GCTCTGCGGGAGGATCTGGGGACGCAGTGGGGAACCAGACAGGCAGTTGGAGGTCTAGTG[CG]CACCAGAAGCCAGTTCCCACCCAGGGTGCCATTTGCTGGGCGCCCTAGGGAGCTGCGTGG	1				chr8:143828885-143829905	N_Shore	TSS1500	ENSG00000287222.1	ENST00000654408.1					FALSE					Quies;ReprPCWk;TssFlnkU;TssFlnkD;TssA;TssFlnk;TxWk;Het;EnhA2;ReprPC;EnhG2;EnhA1	685;110;589;56;150;32;12;10;6;7;5;1	cg01692572	cg01692572
cg01697383	cg01697383	-0.0410785	0.00888433	-4.6237	3.76948e-06	0.0208252	cg01697383_TC21	93617857	ACACACATAAATATTTATATCAATAAATACRCRCCCACATCATCATTTTC						cg	F	T	C	2	II	17	63439802	Human	GRCh38	CGAAAATGATGATGTGGGCGCGTATCCATTGACACAAACATCCATGTGTG	CTGAGGGCGTAGCACACATGGATGTTTGTGTCAATGGATACGCGCCCACATCATCATTTT[CG]TAACCTCACACTCTTGCATTGCACGGCCATTTTTTAGCCAACTAGTTCCCATTGTTCAGC	CTGAGGGCGTAGCACACATGGATGTTTGTGTCAATGGATACGCGCCCACATCATCATTTT[CG]TAACCTCACACTCTTGCATTGCACGGCCATTTTTTAGCCAACTAGTTCCCATTGTTCAGC	1				chr17:63437391-63438025	S_Shore	TSS1500	ENSG00000008283.16	ENST00000542042.5			17:61516910-61517930	Unclassified	TRUE		EH38D5030387	EH38E3236347|DNase-only;EH38E3236347|Low-DNase;EH38E3236347|pELS	5;78;4	Quies;ReprPCWk;EnhA1;EnhA2;ReprPC;EnhWk;TxWk;TssFlnkD;EnhBiv;TssFlnkU;Het;TssA;TssFlnk;TssBiv	600;437;148;78;82;92;147;5;16;45;3;2;6;2
cg01699998	cg01699998	-0.0348536	0.00807781	-4.31473	1.59797e-05	0.0496509	cg01699998_BC21	7607898	ATCACAACAATCTCAACTCACAAAAACATAATTTTAAAACTCRAAAAACC						cg	R	B	C	2	II	2	64787929	Human	GRCh38	TCACAGCAGTCTCAACTCACAAAGACATGATTTTGAAACTCGGGAAGCCG	CTTATAACTGAGAGTAGCCCTGTGACTAGGCATGGCCAATGACTAGAAGTGATGTAACTT[CG]GCTTCCCGAGTTTCAAAATCATGTCTTTGTGAGTTGAGACTGCTGTGATAACACACCGCA	CTTATAACTGAGAGTAGCCCTGTGACTAGGCATGGCCAATGACTAGAAGTGATGTAACTT[CG]GCTTCCCGAGTTTCAAAATCATGTCTTTGTGAGTTGAGACTGCTGTGATAACACACCGCA	1													FALSE		EH38D3133189	EH38E2004126|DNase-only;EH38E2004126|Low-DNase	3;84	Quies;TxWk;EnhA2;EnhA1;ReprPCWk;EnhWk	1359;275;11;4;10;4
cg01702042	cg01702042	-0.0094082	0.00202793	-4.63931	3.49575e-06	0.0199766	cg01702042_BC21	15777447	CACAATCAAAAAAAAATTATAACCAAAACAACCTTTACTAAAATACCAAC						cg	F	B	C	2	II	14	96501560	Human	GRCh38	ACAGTCAAGGGGAAATTATGACCAAGACAACCTTTGCTAAAATGCCAGCG	AGGGCTGGAAACACAGTCAAGGGGAAATTATGACCAAGACAACCTTTGCTAAAATGCCAG[CG]GTGACTGCCATTGATGTTCCTATAAAAGGTCAGCTCTGTCAGGAAGTTCCAGTGCATCAT	ATGATGCACTGGAACTTCCTGACAGAGCTGACCTTTTATAGGAACATCAATGGCAGTCAC[CG]CTGGCATTTTAGCAAAGGTTGTCTTGGTCATAATTTCCCCTTGACTGTGTTTCCAGCCCT	1	TSS1500;TSS1500;TSS1500;TSS1500;TSS1500;TSS1500;TSS1500;TSS1500;TSS1500;TSS1500	PAPOLA;PAPOLA;PAPOLA;PAPOLA;PAPOLA;PAPOLA;PAPOLA;PAPOLA;PAPOLA;PAPOLA	NM_001293628.2;NM_001293632.3;NM_001363666.3;NM_001363664.3;NM_001363665.3;NM_001363662.3;NM_032632.5;NM_001252006.1;NM_001252007.1;NM_001293627.1	chr14:96501817-96503034	N_Shore	exon_1;exon_1;TSS1500;TSS1500;TSS1500;TSS1500;TSS1500;TSS1500;TSS1500;TSS1500;TSS1500;TSS1500	PAPOLA;PAPOLA-DT;ENSG00000090060.19;ENSG00000090060.19;ENSG00000090060.19;ENSG00000090060.19;ENSG00000090060.19;ENSG00000090060.19;ENSG00000090060.19;ENSG00000090060.19;ENSG00000090060.19;ENSG00000090060.19	ENST00000554887.5;ENST00000569214.1;ENST00000618976.2;ENST00000553357.5;ENST00000216277.13;ENST00000553689.5;ENST00000557320.5;ENST00000554130.5;ENST00000557471.5;ENST00000556619.5;ENST00000392990.6;ENST00000555626.5					FALSE		EH38D2756042	EH38E1739882|DNase-H3K4me3;EH38E1739882|Low-DNase;EH38E1739882|pELS	1;67;19	ReprPCWk;TssA;TssFlnkU;TssFlnk;Quies;TxWk;TssFlnkD;EnhA2;EnhA1;ReprPC;EnhWk;Het	609;317;422;55;212;5;26;8;3;3;2;1	cg01702042
cg01715740	cg01715740	-0.0120877	0.0028009	-4.31566	1.5913e-05	0.049558	cg01715740_BC21	58623217	ACTCAACRAAACCCTACTTTATCTTATAAAAACTATTTCCACATTCACTC						cg	R	B	C	2	II	14	65412148	Human	GRCh38	CTCAGCGAAGCCCTACTTTATCTTGTAAGAGCTGTTTCCACATTCACTCG	CCGCGGGTCGGGAGAGGCCGGGCATCGAACTCAGGCCCTCGTGGGGGGGGTCTTTCTCTT[CG]AGTGAATGTGGAAACAGCTCTTACAAGATAAAGTAGGGCTTCGCTGAGTCTCCTGGGGGA	CCGCGGGTCGGGAGAGGCCGGGCATCGAACTCAGGCCCTCGTGGGGGGGGTCTTTCTCTT[CG]AGTGAATGTGGAAACAGCTCTTACAAGATAAAGTAGGGCTTCGCTGAGTCTCCTGGGGGA	1	exon_1;TSS1500	FUT8-AS1;FUT8	NR_024334.1;NM_001371533.1	chr14:65411768-65413652	Island	exon_1;TSS1500;TSS1500;TSS1500;TSS1500;TSS1500;TSS1500;TSS1500	FUT8-AS1;ENSG00000033170.17;ENSG00000033170.17;ENSG00000033170.17;ENSG00000033170.17;ENSG00000033170.17;ENSG00000033170.17;ENSG00000033170.17	ENST00000621019.2;ENST00000673929.1;ENST00000674118.1;ENST00000553924.5;ENST00000358307.6;ENST00000557338.5;ENST00000554610.1;ENST00000556292.1			14:65878344-65879697	Promoter_Associated	TRUE		EH38D4822287	EH38E3100268|Low-DNase;EH38E3100268|pELS;EH38E3100268|pELS/CTCF-bound	15;35;37	TxWk;TssA;Quies;Tx;TssFlnkU;TssFlnk;EnhWk;EnhG1;TssFlnkD;EnhA2	435;754;358;32;74;4;3;1;1;1	cg01715740
cg01725773	cg01725773	-0.0132747	0.00270199	-4.91296	8.9712e-07	0.00856844	cg01725773_BC21	6642502	CCTTATCATCCTTAACTAATATTTAATCAACTAACATTTACCAAATTCTC						cg	F	B	C	2	II	14	23006641	Human	GRCh38	TATGGAGAAACTGAAAAATGAAAAAGTAGCTCCTAGAACTCGTGCCAGCG	ACCCACTGCATTTATGGAGAAACTGAAAAATGAAAAAGTAGCTCCTAGAACTCGTGCCAG[CG]AGAACTTGGTAAATGTTAGTTGATTAAATATTAGTCAAGGATGACAAGGTGGACCCCAGG	CCTGGGGTCCACCTTGTCATCCTTGACTAATATTTAATCAACTAACATTTACCAAGTTCT[CG]CTGGCACGAGTTCTAGGAGCTACTTTTTCATTTTTCAGTTTCTCCATAAATGCAGTGGGT	1				chr14:23006713-23007218;chr14:23010101-23010323	N_Shore;N_Shelf	exon_1	ENSG00000280129	ENST00000623843.1			14:23475785-23476943	Promoter_Associated	TRUE					TssFlnkU;EnhWk;TssA;ReprPCWk;EnhA1;TxWk;EnhG2;Quies;EnhA2;ReprPC;TssFlnkD;Het;TssFlnk;EnhG1;Tx;ZNF/Rpts	328;88;542;8;139;29;38;338;120;2;8;6;10;3;2;2	cg01725773
cg01731096	cg01731096	-0.00909715	0.00187045	-4.86362	1.15259e-06	0.00990772	cg01731096_BC11	41715537	TTATAATTTTTTATAAAAACAATCTCACTATATTCTACAAACTATTCTCA	73775859	TTATAATTTTTTATAAAAACGATCTCGCTATATTCTACAAACTATTCTCG	A	Red	R	cg	R	B	C	1	I	7	100611327	Human	GRCh38	TTGTAATTTTTTGTAGAGACGATCTCGCTATGTTCTGCAGGCTGTTCTCG	ACAGTGGCTCTCATGCACTTTGGGAGGCTTAAGTGGGAGGATCGCTTGGGCCCAGGAGTT[CG]AGAACAGCCTGCAGAACATAGCGAGATCGTCTCTACAAAAAATTACAAAAAGCCAGGCAT	ACAGTGGCTCTCATGCACTTTGGGAGGCTTAAGTGGGAGGATCGCTTGGGCCCAGGAGTT[CG]AGAACAGCCTGCAGAACATAGCGAGATCGTCTCTACAAAAAATTACAAAAAGCCAGGCAT	1	TSS1500;TSS1500;TSS1500;TSS1500;TSS1500;TSS1500	MOSPD3;MOSPD3;MOSPD3;MOSPD3;MOSPD3;MOSPD3	NM_001363415.1;NM_001040099.2;NM_023948.5;NM_001040098.1;NM_001363416.1;NM_001040097.2	chr7:100611971-100613032	N_Shore	TSS1500;TSS1500;TSS1500;TSS1500;TSS1500;TSS1500;TSS1500;TSS1500	ENSG00000106330.12;ENSG00000106330.12;ENSG00000106330.12;ENSG00000106330.12;ENSG00000106330.12;ENSG00000106330.12;ENSG00000106330.12;ENSG00000106330.12	ENST00000223054.8;ENST00000462372.5;ENST00000490309.1;ENST00000493970.5;ENST00000379527.6;ENST00000393950.7;ENST00000424091.2;ENST00000497456.1					FALSE					ReprPC;TxWk;ReprPCWk;Quies;EnhA2;TssBiv;EnhBiv;EnhWk;TssA;TssFlnk;EnhA1;TssFlnkU;TssFlnkD;EnhG2	640;185;184;386;79;33;83;36;6;17;5;4;4;1	cg01731096
cg01735049	cg01735049	-0.0234496	0.0052375	-4.47724	7.56129e-06	0.0319169	cg01735049_BC21	65765575	ACACAAAATCTAAACCCACCRTTACCAAAAATACACAAATAAACAAAAAC						cg	R	B	C	2	II	16	9093756	Human	GRCh38	CACAAAATCTAAACCCACCGTTACCAAGAATGCACAAATGGGCAAGAACG	TGGTTCCTTTCTGGAGTTAATCCCCCTCCCTTTGTGATGACATGAAGATGTGTAAGTAAA[CG]TTCTTGCCCATTTGTGCATTCTTGGTAACGGTGGGTTTAGATTTTGTGCCTTACTGGTTT	TGGTTCCTTTCTGGAGTTAATCCCCCTCCCTTTGTGATGACATGAAGATGTGTAAGTAAA[CG]TTCTTGCCCATTTGTGCATTCTTGGTAACGGTGGGTTTAGATTTTGTGCCTTACTGGTTT	1				chr16:9090289-9092832	S_Shore								FALSE		EH38D4924207	EH38E3167036|dELS;EH38E3167036|Low-DNase	1;86	Quies;TssFlnkD;TssFlnk;TssFlnkU;EnhG2;TssA;EnhWk;ReprPCWk;TxWk;EnhA1;EnhG1;EnhA2	805;320;277;97;58;50;7;23;20;2;2;2	cg01735049
cg01735788	cg01735788	-0.145105	0.0324932	-4.46572	7.9799e-06	0.0328893	cg01735788_TC21	95758507	ACRATAAAAACCTCTCTCCAAAAACCAATAATTAATCTTAAAACTAAAAC						cg	R	T	C	2	II	22	27124392	Human	GRCh38	CGTCCCAGTTTCAAGATTAATCACTGGCTTTTGGAGAGAGGCCCTCACCG	CCATGGCATGTGTGCTGTGATTTTCTCTACATGGTACTCCAGTTTGCAGGAAAATGAAAG[CG]TCCCAGTTTCAAGATTAATCACTGGCTTTTGGAGAGAGGCCCTCACCGCCCTCCCTGCTC	GAGCAGGGAGGGCGGTGAGGGCCTCTCTCCAAAAGCCAGTGATTAATCTTGAAACTGGGA[CG]CTTTCATTTTCCTGCAAACTGGAGTACCATGTAGAGAAAATCACAGCACACATGCCATGG	1									chr22:27124339-27124731				FALSE		EH38D3359974	EH38E2155193|dELS;EH38E2155193|DNase-only;EH38E2155193|Low-DNase	7;13;67	Quies;TxWk;ReprPCWk;Tx;EnhA2;EnhWk;EnhA1;TssFlnkD;Het;EnhBiv;TssFlnkU;ReprPC;TssA;TssFlnk;ZNF/Rpts	1123;171;105;52;59;52;36;13;6;11;11;20;2;1;1
cg01745448	cg01745448	-0.0203	0.00394572	-5.14482	2.67784e-07	0.00432481	cg01745448_TC21	69617957	AACCAAATTAAACACRTTTTCAACCTAAATTTCTAACTCTATACTAAACC						cg	F	T	C	2	II	1	155262588	Human	GRCh38	CGGCCCAGTATAGAGCCAGAAACTCAGGTTGAAAACGTGCTCAACCTGGC	TCCCCCCTAGGAGCCAGGTTGAGCACGTTTTCAACCTGAGTTTCTGGCTCTATACTGGGC[CG]CGGCCTAATGACTCTAGGAGTCAGATCTTTCCCAACTCTCATAATTCCACATCCGAGAAG	TCCCCCCTAGGAGCCAGGTTGAGCACGTTTTCAACCTGAGTTTCTGGCTCTATACTGGGC[CG]CGGCCTAATGACTCTAGGAGTCAGATCTTTCCCAACTCTCATAATTCCACATCCGAGAAG	1	TSS1500;TSS1500	SCAMP3;SCAMP3	NM_005698.4_2;NM_052837.3_2	chr1:155262021-155262521	S_Shore	TSS1500;TSS200;TSS1500;TSS1500;TSS1500;TSS1500	ENSG00000116521.11;ENSG00000116521.11;ENSG00000116521.11;ENSG00000116521.11;ENSG00000116521.11;ENSG00000116521.11	ENST00000302631.8;ENST00000355379.3;ENST00000465312.5;ENST00000462151.5;ENST00000497470.1;ENST00000480219.1			1:155231375-155232661	Promoter_Associated	TRUE					ReprPCWk;Tx;TssA;TssFlnkU;Quies;EnhA2;TssFlnk;TxWk;ReprPC;TssFlnkD;EnhWk;EnhBiv;Het;EnhA1	608;5;592;157;48;26;48;47;124;4;1;1;1;1	cg01745448	cg01745448
cg01748255	cg01748255	-0.0573482	0.0119756	-4.78874	1.6783e-06	0.0124078	cg01748255_BC21	72624151	ACATTCCATCTCCTTAACACAATAACAAATTAAAAACTAAACATTTAACC						cg	R	B	C	2	II	18	58682581	Human	GRCh38	CATTCCATCTCCTTGGCACAGTGACAGGTTAAGAGCTAGGCATTTGACCG	TCTGGGCTCCTTCATTCTTGCCCCAGCAAAACCCAGAGGGTTCATCTAGTTAACTAGCTT[CG]GTCAAATGCCTAGCTCTTAACCTGTCACTGTGCCAAGGAGATGGAATGTGCTGACTCGCC	TCTGGGCTCCTTCATTCTTGCCCCAGCAAAACCCAGAGGGTTCATCTAGTTAACTAGCTT[CG]GTCAAATGCCTAGCTCTTAACCTGTCACTGTGCCAAGGAGATGGAATGTGCTGACTCGCC	1													FALSE		EH38D3014450	EH38E1920521|dELS;EH38E1920521|DNase-only;EH38E1920521|Low-DNase	6;34;47	Quies;EnhWk;TxWk;Tx;TssFlnkD;EnhG1;EnhA1;EnhG2;Het;EnhA2;TssA;ReprPCWk	926;232;229;73;1;114;42;12;18;13;1;2
cg01751746	cg01751746	-0.0337254	0.00753991	-4.47292	7.71591e-06	0.0322608	cg01751746_BC21	63740870	CCRTAAACCTTAACRATACTCAAAATCTATACAAACAACAAACAAATACC						cg	F	B	C	2	II	5	41058227	Human	GRCh38	CGTGGGCCTTAACGATGCTCAAAGTCTGTACAGGCAGCAAACAAATACCG	TCACCGTGGGCCCGTGGGCCTTAACGATGCTCAAAGTCTGTACAGGCAGCAAACAAATAC[CG]TTTCTGAAACTTCCTTATGTTTTTCATAGGTTTTCAGAACACCAGGAGCTTTAGGTACTC	GAGTACCTAAAGCTCCTGGTGTTCTGAAAACCTATGAAAAACATAAGGAAGTTTCAGAAA[CG]GTATTTGTTTGCTGCCTGTACAGACTTTGAGCATCGTTAAGGCCCACGGGCCCACGGTGA	1						TSS200;TSS200	ENSG00000171495.17;ENSG00000171495.17	ENST00000515297.5;ENST00000506092.6					FALSE		EH38D5644499			Quies;Het;ReprPCWk;ZNF/Rpts	1617;28;14;4
cg01763364	cg01763364	-0.0488698	0.0105792	-4.61941	3.84827e-06	0.0210754	cg01763364_TC21	47650309	ACTAAAATCCCCTATCAATTCATTCAACCAAACTTACAAAAAATCACAAC						cg	F	T	C	2	II	1	64922415	Human	GRCh38	CGTTGTGACTTCTTGTAAGCTTGGCTGAATGAACTGACAGGGGATTCCAG	ATACAGTAAGGGCTGGAATCCCCTGTCAGTTCATTCAGCCAAGCTTACAAGAAGTCACAA[CG]TGGGAATTTCCAAAGCCAGTCAAACATCAGGAGTATAAATGTCATGTACCTAGACTTCTC	ATACAGTAAGGGCTGGAATCCCCTGTCAGTTCATTCAGCCAAGCTTACAAGAAGTCACAA[CG]TGGGAATTTCCAAAGCCAGTCAAACATCAGGAGTATAAATGTCATGTACCTAGACTTCTC	1									chr1:64922089-64922864				FALSE	RDMR	EH38D4389508	EH38E2816812|Low-DNase	87	Quies;ReprPCWk;EnhWk;TxWk;EnhA1;EnhA2;TssFlnkU;TssFlnkD;Het;ReprPC	1038;84;326;113;90;7;1;1;1;2
cg01804557	cg01804557	-0.0356423	0.00760703	-4.68544	2.79358e-06	0.01724	cg01804557_BC21	48605845	CTTTCATTCTACTTACTTTTTTTAATTTCTTCCTTAAATCTATTCCTTAC						cg	R	B	C	2	II	15	65800910	Human	GRCh38	TTTCATTCTGCTTACTTTTTTTAGTTTCTTCCTTAGATCTATTCCTTACG	GGCCAAGTTGCATTAGAAGGAGAAAGTCAGTAGAGGTTAGTGTTGCAATCTGTAAATATA[CG]TAAGGAATAGATCTAAGGAAGAAACTAAAAAAAGTAAGCAGAATGAAAGTATGGCCAGTA	GGCCAAGTTGCATTAGAAGGAGAAAGTCAGTAGAGGTTAGTGTTGCAATCTGTAAATATA[CG]TAAGGAATAGATCTAAGGAAGAAACTAAAAAAAGTAAGCAGAATGAAAGTATGGCCAGTA	1													FALSE		EH38D4883807			TxWk;Quies;Tx;EnhA2;EnhA1;EnhWk;TssFlnk;ReprPCWk;TssFlnkU	748;737;151;6;6;10;2;1;2
cg01809871	cg01809871	-0.028414	0.00622404	-4.56521	4.99004e-06	0.0246453	cg01809871_BC21	40640294	CTACACTTACAAAAATAACTCAAACTTTCACCTACTTCAAACCCTAAACC						cg	F	B	C	2	II	20	63377993	Human	GRCh38	TGCACTTGCAGAAGTAGCTCAGACTTTCACCTGCTTCAAACCCTGGGCCG	TGGAACAAAGGCTGCACTTGCAGAAGTAGCTCAGACTTTCACCTGCTTCAAACCCTGGGC[CG]TCTTCTGGTCTCAAGGCCAGGAGGCAGGGCCCACCGTCTGCTCCCTCCTGCTGGATGGAG	CTCCATCCAGCAGGAGGGAGCAGACGGTGGGCCCTGCCTCCTGGCCTTGAGACCAGAAGA[CG]GCCCAGGGTTTGAAGCAGGTGAAAGTCTGAGCTACTTCTGCAAGTGCAGCCTTTGTTCCA	1						exon_1;exon_1	CHRNA4;CHRNA4	ENST00000463705.5;ENST00000475033.5			20:62008883-62009532	Unclassified_Cell_type_specific	TRUE		EH38D5353180	EH38E3448651|CTCF-only/CTCF-bound;EH38E3448651|dELS/CTCF-bound;EH38E3448651|DNase-H3K4me3/CTCF-bound;EH38E3448651|DNase-only;EH38E3448651|Low-DNase	1;1;2;1;82	ReprPC;EnhA1;ReprPCWk;EnhBiv;Quies;EnhWk;EnhA2;Het;TssFlnkU;TssBiv;TssFlnkD;EnhG1	447;30;96;177;35;25;5;2;9;3;3;1
cg01829672	cg01829672	-0.0496918	0.0109323	-4.54541	5.48284e-06	0.0260243	cg01829672_BC21	40728413	CCACAATATTCTACAAAACAAATCCCTCTACTACCACCAAAAAATACAAC						cg	F	B	C	2	II	5	157855609	Human	GRCh38	CACAATGTTCTGCAAAACAAATCCCTCTACTGCCACCAGGAGGTGCAGCG	TTCCCTCAGTTCCACAATGTTCTGCAAAACAAATCCCTCTACTGCCACCAGGAGGTGCAG[CG]ATTGTGGAAAATATACCCCCACTTCCAGAAAAAGTCTTCAAGGTCTCAAAAGCCAGTGTT	AACACTGGCTTTTGAGACCTTGAAGACTTTTTCTGGAAGTGGGGGTATATTTTCCACAAT[CG]CTGCACCTCCTGGTGGCAGTAGAGGGATTTGTTTTGCAGAACATTGTGGAACTGAGGGAA	1				chr5:157858761-157859246	N_Shelf						5:157282261-157283207	Promoter_Associated_Cell_type_specific	TRUE		EH38D5703835	EH38E3673605|CTCF-only/CTCF-bound;EH38E3673605|dELS/CTCF-bound;EH38E3673605|DNase-H3K4me3/CTCF-bound;EH38E3673605|Low-DNase	50;1;3;33	Quies;TxWk;EnhWk;ReprPC;TssFlnkD;EnhA1;Het;EnhA2;ReprPCWk;TssFlnk;EnhG2;EnhG1;TssFlnkU	1008;378;219;1;6;7;14;8;11;2;1;7;1	cg01829672
cg01832997	cg01832997	-0.0398271	0.00859643	-4.63298	3.60442e-06	0.020362	cg01832997_TC21	19794323	TAAAAATAATCAACCCTATTTATAACCTACTAACCAAAACCACTAAAAAC						cg	F	T	C	2	II	10	100286986	Human	GRCh38	CGTCTTCAGTGGTTTTGGTCAGCAGGCCACAAACAGGGTTGACTATTCCC	CACGACCCGTCTGGGAATAGTCAACCCTGTTTGTGGCCTGCTGACCAAAACCACTGAAGA[CG]GATTGCCCGCTCTCCTGACACTCCGCACTGGAGTTAGTCATCAAAAGATTGCTCAGGGAA	CACGACCCGTCTGGGAATAGTCAACCCTGTTTGTGGCCTGCTGACCAAAACCACTGAAGA[CG]GATTGCCCGCTCTCCTGACACTCCGCACTGGAGTTAGTCATCAAAAGATTGCTCAGGGAA	1	TSS1500;TSS1500;TSS1500;TSS1500;TSS1500;TSS1500	BLOC1S2;BLOC1S2;BLOC1S2;BLOC1S2;BLOC1S2;BLOC1S2	NM_001282437.2;NM_001282436.2;NM_173809.5;NM_001282439.2;NM_001001342.2;NM_001282438.1	chr10:100286385-100286875	S_Shore	TSS1500;TSS1500;TSS1500;TSS1500;TSS1500	ENSG00000196072.12;ENSG00000196072.12;ENSG00000196072.12;ENSG00000196072.12;ENSG00000196072.12	ENST00000614731.4;ENST00000370372.7;ENST00000441611.5;ENST00000361832.2;ENST00000579542.1			10:102045499-102047347	Promoter_Associated	TRUE		EH38D4544202	EH38E2920079|DNase-H3K4me3;EH38E2920079|Low-DNase;EH38E2920079|pELS;EH38E2920079|pELS/CTCF-bound	2;24;54;7	Quies;ReprPCWk;TssFlnkU;TssA;ReprPC;TssFlnk;EnhWk;EnhA2;EnhA1;TssFlnkD;TxWk	663;147;682;107;21;11;5;13;3;10;1
cg01841520	cg01841520	-0.0329976	0.00707809	-4.66193	3.13262e-06	0.0186146	cg01841520_BC21	23741863	TAAACCTTCCCCAATCAACTCAATTAAAAATTCCCTAACAAACAATAAAC						cg	F	B	C	2	II	2	43011293	Human	GRCh38	AAGCCTTCCCCAATCAGCTCAGTTAAGAATTCCCTGACAGACAATGGGCG	GACTATGGACCTAAGCCTTCCCCAATCAGCTCAGTTAAGAATTCCCTGACAGACAATGGG[CG]TTAGCCCAGCAGTCAAGATCAGATTGACAGTGTTGCTTTTTCACTCAGACCTACTGTGAC	GTCACAGTAGGTCTGAGTGAAAAAGCAACACTGTCAATCTGATCTTGACTGCTGGGCTAA[CG]CCCATTGTCTGTCAGGGAATTCTTAACTGAGCTGATTGGGGAAGGCTTAGGTCCATAGTC	1													FALSE		EH38D5185236	EH38E3339753|dELS;EH38E3339753|DNase-only;EH38E3339753|Low-DNase	4;4;79	Quies;ReprPC;TxWk;EnhA2;EnhA1;EnhWk;ReprPCWk;Tx;Het;EnhG1	1145;5;218;24;65;120;56;16;8;6
cg01854097	cg01854097	-0.0378406	0.00697251	-5.42712	5.72715e-08	0.00166931	cg01854097_BC21	43743973	RATTCCTTTACCTTCCTTCAAAACTATTCTTAACRAATTCCTACTATTTC						cg	F	B	C	2	II	15	75624753	Human	GRCh38	GTTCCTTTACCTTCCTTCAAGGCTGTTCTTGGCGGGTTCCTGCTGTTTCG	GATACTGGGGCGGTTCCTTTACCTTCCTTCAAGGCTGTTCTTGGCGGGTTCCTGCTGTTT[CG]TTTTGTTTTTTCTTTGTTGTTGTTGTTTTTTTTTTGAGACAGAGTTTCGCTCTTGTTGCC	GGCAACAAGAGCGAAACTCTGTCTCAAAAAAAAAACAACAACAACAAAGAAAAAACAAAA[CG]AAACAGCAGGAACCCGCCAAGAACAGCCTTGAAGGAAGGTAAAGGAACCGCCCCAGTATC	1				chr15:75625262-75625871	N_Shore	exon_2;exon_1;5UTR;5UTR;TSS200	SNUPN;SNUPN;SNUPN;SNUPN;ENSG00000260235.1	ENST00000564644.5;ENST00000563793.1;ENST00000564644.5;ENST00000563793.1;ENST00000566036.1					FALSE		EH38D4893655	EH38E3146941|Low-DNase;EH38E3146941|PLS	86;1	Quies;TssFlnk;EnhA1;TssFlnkD;TssA;TssFlnkU;TxWk;ReprPCWk;ReprPC;EnhA2;EnhWk	780;329;5;56;179;152;82;47;2;17;14
cg01855070	cg01855070	-0.0802423	0.0163707	-4.90159	9.50662e-07	0.00887544	cg01855070_TC21	30711488	ACRCTATCAAACAATTATCACAATCAAATTTATCTCCACATCTTAAACCC						cg	F	T	C	2	II	3	42159822	Human	GRCh38	CGGGCTTAAGATGTGGAGACAAATCTGACTGTGACAACTGCCTGACAGCG	TCCTCTGCTCAGCGCTGTCAGGCAGTTGTCACAGTCAGATTTGTCTCCACATCTTAAGCC[CG]CCCACAGGAAGTCTCTCATCTGGGGGTGTTGGGCAGTGCTTCAGCAGGACAATTCCTCCG	TCCTCTGCTCAGCGCTGTCAGGCAGTTGTCACAGTCAGATTTGTCTCCACATCTTAAGCC[CG]CCCACAGGAAGTCTCTCATCTGGGGGTGTTGGGCAGTGCTTCAGCAGGACAATTCCTCCG	1	TSS1500	TRAK1	NM_014965.5			TSS1500;TSS1500;TSS1500	ENSG00000182606.17;ENSG00000182606.17;ENSG00000182606.17	ENST00000341421.7;ENST00000396175.5;ENST00000469506.3			3:42201101-42201687	Unclassified_Cell_type_specific	TRUE		EH38D5444568	EH38E3507988|DNase-only;EH38E3507988|Low-DNase;EH38E3507988|pELS;EH38E3507988|PLS	4;42;9;32	EnhWk;TxWk;TssFlnkU;EnhA1;Quies;TssFlnkD;TssA;EnhA2;TssFlnk	337;494;360;96;158;56;70;65;27	cg01855070
cg01856754	cg01856754	-0.0319382	0.00725936	-4.3996	1.08453e-05	0.0395316	cg01856754_TC21	34763920	TCTTATATCTACCRAACAATAAACAAAACTCCTTCCTATCCAAACTCCCC						cg	R	T	C	2	II	14	94390737	Human	GRCh38	CGGGGAGCTTGGACAGGAAGGAGCCTTGCTCATTGCCCGGCAGACACAAG	GCCCAGTTCCTGCCCACCCAGGAAGTAGACTTCGGGTGGAGGCAGTAGGCTGGGGAGGGG[CG]GGGAGCTTGGACAGGAAGGAGCCTTGCTCATTGCCCGGCAGACACAAGACTGGGCCCTCA	TGAGGGCCCAGTCTTGTGTCTGCCGGGCAATGAGCAAGGCTCCTTCCTGTCCAAGCTCCC[CG]CCCCTCCCCAGCCTACTGCCTCCACCCGAAGTCTACTTCCTGGGTGGGCAGGAACTGGGC	1	TSS200;TSS200;TSS200;TSS200;TSS200;TSS200;TSS200;TSS200;TSS200;TSS200	SERPINA1;SERPINA1;SERPINA1;SERPINA1;SERPINA1;SERPINA1;SERPINA1;SERPINA1;SERPINA1;SERPINA1	NM_001127701.2_2;NM_001127702.2_2;NM_001127700.2_2;NM_001002236.3_2;NM_001127705.2_2;NM_001127703.2_2;NM_001127704.2_2;NM_001127706.2_2;NM_001127707.2_2;NM_001002235.3_2			TSS200;TSS200;TSS200;TSS200;TSS200;TSS200;TSS200;TSS200;TSS200;TSS200;TSS200;TSS200;TSS200;TSS200;TSS200	ENSG00000197249.14;ENSG00000197249.14;ENSG00000197249.14;ENSG00000197249.14;ENSG00000197249.14;ENSG00000197249.14;ENSG00000197249.14;ENSG00000197249.14;ENSG00000197249.14;ENSG00000197249.14;ENSG00000197249.14;ENSG00000197249.14;ENSG00000197249.14;ENSG00000197249.14;ENSG00000289541.1	ENST00000440909.5;ENST00000355814.8;ENST00000437397.5;ENST00000448921.5;ENST00000393088.8;ENST00000404814.8;ENST00000449399.7;ENST00000557492.5;ENST00000556955.5;ENST00000553327.5;ENST00000557118.5;ENST00000555289.5;ENST00000557361.5;ENST00000557093.1;ENST00000693506.1					FALSE		EH38D4841418	EH38E3112983|DNase-only;EH38E3112983|Low-DNase;EH38E3112983|pELS;EH38E3112983|PLS	11;47;16;13	Quies;ReprPC;TssA;EnhA2;EnhA1;EnhWk;ReprPCWk;TxWk;TssFlnkU;Het;TssFlnk;TssFlnkD;EnhBiv	1081;11;23;105;99;91;134;59;42;8;7;2;1
cg01858866	cg01858866	-0.0284676	0.00656435	-4.3367	1.44636e-05	0.0467225	cg01858866_BC21	37609361	ACTATTTCATTAATTAACAATAAAAAAACCCACTTCAACAACAACTCCTC						cg	F	B	C	2	II	1	39574344	Human	GRCh38	CTATTTCATTAATTAGCAGTAAAGGAGCCCACTTCAACAACAGCTCCTCG	TGGGATCGCAAACTATTTCATTAATTAGCAGTAAAGGAGCCCACTTCAACAACAGCTCCT[CG]TCTATTTCCAGACAGCACTGCACAAGGCAAGCCGGCTTAGTCTGACAAATCTGGCTGCAC	GTGCAGCCAGATTTGTCAGACTAAGCCGGCTTGCCTTGTGCAGTGCTGTCTGGAAATAGA[CG]AGGAGCTGTTGTTGAAGTGGGCTCCTTTACTGCTAATTAATGAAATAGTTTGCGATCCCA	1				chr1:39575645-39576995	N_Shore	exon_1	PABPC4	ENST00000677548.1			1:40039959-40040155	Promoter_Associated_Cell_type_specific	TRUE		EH38D2154448	EH38E1339505|DNase-H3K4me3;EH38E1339505|Low-DNase;EH38E1339505|pELS	8;67;12	EnhA2;TxWk;TssFlnkU;TssFlnkD;Quies;EnhG2;TssFlnk;EnhA1;TssA;EnhWk;EnhG1;ReprPCWk;ReprPC;Tx	95;235;162;486;161;142;52;91;26;178;18;12;4;1	cg01858866
cg01867298	cg01867298	-0.0340029	0.00669399	-5.07962	3.78196e-07	0.00527669	cg01867298_TC21	48685309	AACAAACTAAATTATCCTCTATATAAAACATTCTAAAACATTCTAAAAAC						cg	F	T	C	2	II	11	117818428	Human	GRCh38	CGTTTCTAGAATGTTCTAGAATGTTCCATACAGAGGACAATCCAGCCTGC	CCTCTGAGGGTGGCAGGCTGGATTGTCCTCTGTATGGAACATTCTAGAACATTCTAGAAA[CG]TGATTCTTCTCCAGTGCTCTTACTTCTCCTGGGGTGGGCCACAGGTCTGAATACCCCCTC	CCTCTGAGGGTGGCAGGCTGGATTGTCCTCTGTATGGAACATTCTAGAACATTCTAGAAA[CG]TGATTCTTCTCCAGTGCTCTTACTTCTCCTGGGGTGGGCCACAGGTCTGAATACCCCCTC	1	TSS1500	DSCAML1	NM_001367905.1			exon_1;TSS1500;TSS200	FXYD2;ENSG00000177103.15;ENSG00000254844.4	ENST00000514385.1;ENST00000525836.1;ENST00000531850.2			11:117688229-117689306	Unclassified	TRUE		EH38D2502776	EH38E1573609|CTCF-only/CTCF-bound;EH38E1573609|DNase-only;EH38E1573609|Low-DNase;EH38E1573609|pELS;EH38E1573609|pELS/CTCF-bound	4;2;69;6;6	EnhWk;TxWk;Quies;EnhA1;EnhA2;ReprPCWk;EnhG2;ReprPC	297;244;541;260;133;186;1;1
cg01871427	cg01871427	-0.046751	0.0102501	-4.56103	5.09023e-06	0.024911	cg01871427_TC21	67628377	AAACTATCAACCCCAAAATTCAATATTTCCCTATATCTTACATACTCTAC						cg	R	T	C	2	II	12	89948178	Human	GRCh38	CGTAGAGTATGCAAGATACAGGGAAACACTGAATCCTGGGGCTGACAGTT	AGAGGAGAATGAATCATTGGAATTTTTTTTTTTTTTTAAACAGTGATTCAGAGCAAACTG[CG]TAGAGTATGCAAGATACAGGGAAACACTGAATCCTGGGGCTGACAGTTTACATCCTGGCT	AGCCAGGATGTAAACTGTCAGCCCCAGGATTCAGTGTTTCCCTGTATCTTGCATACTCTA[CG]CAGTTTGCTCTGAATCACTGTTTAAAAAAAAAAAAAAATTCCAATGATTCATTCTCCTCT	1	exon_2	LINC02399	NR_135019.1			exon_2	LINC02399	ENST00000547094.1					FALSE		EH38D2588599	EH38E1631267|DNase-only;EH38E1631267|Low-DNase;EH38E1631267|pELS	2;69;16	Quies;EnhA1;EnhA2;TssFlnkU;EnhWk;TssA;TxWk;ReprPCWk;Het	910;422;230;9;48;7;32;4;1	cg01871427
cg01875596	cg01875596	-0.0344115	0.00735309	-4.67987	2.87056e-06	0.0175509	cg01875596_BC21	33660433	ACCACACATACATAACACCATAATATTCTACACACATATAACTACCACAC						cg	R	B	C	2	II	18	25353732	Human	GRCh38	CCACACATACATGGCACCATAGTATTCTGCACACATATGGCTACCACACG	CAGAAATCATTCAGAAAGGGAAAAATGTGTAAACACCAAGTTTTTACAAGACTTTCCTTT[CG]TGTGGTAGCCATATGTGTGCAGAATACTATGGTGCCATGTATGTGTGGTCCCAAGTTATG	CAGAAATCATTCAGAAAGGGAAAAATGTGTAAACACCAAGTTTTTACAAGACTTTCCTTT[CG]TGTGGTAGCCATATGTGTGCAGAATACTATGGTGCCATGTATGTGTGGTCCCAAGTTATG	1				chr18:25349215-25350266	S_Shelf								FALSE					Quies;Het;ReprPC;EnhBiv;EnhWk;EnhA2;ReprPCWk;TssFlnkD;TssBiv;TxWk;TssA;TssFlnk	1027;8;451;12;18;4;128;5;6;2;1;1	cg01875596
cg01880290	cg01880290	-0.0334403	0.00659531	-5.07031	3.97168e-07	0.00544405	cg01880290_BC21	87733599	CTTAATACRCTACRAACTCAACTCCTAAAACTTCTATTACTACTATAACC						cg	R	B	C	2	II	4	2756784	Human	GRCh38	TTGGTGCGCTGCGAGCTCAGCTCCTGGAGCTTCTGTTGCTGCTGTGGCCG	AACCCCCAAGCTCTGGAGCTAAGTGTGGGTCTGAATCTCCCCGCGAGGGTCCAGGCCTTG[CG]GCCACAGCAGCAACAGAAGCTCCAGGAGCTGAGCTCGCAGCGCACCAAGCACGTGGCATG	AACCCCCAAGCTCTGGAGCTAAGTGTGGGTCTGAATCTCCCCGCGAGGGTCCAGGCCTTG[CG]GCCACAGCAGCAACAGAAGCTCCAGGAGCTGAGCTCGCAGCGCACCAAGCACGTGGCATG	1	TSS1500;TSS1500;TSS1500	TNIP2;TNIP2;TNIP2	NM_001161527.2;NM_024309.4;NM_001292016.2	chr4:2755926-2756562	S_Shore	TSS1500;TSS1500;TSS1500;TSS1500;TSS1500	ENSG00000168884.15;ENSG00000168884.15;ENSG00000168884.15;ENSG00000168884.15;ENSG00000168884.15	ENST00000510267.5;ENST00000315423.12;ENST00000503235.1;ENST00000507686.1;ENST00000511352.1			4:2756910-2758712	Promoter_Associated	TRUE		EH38D5535934	EH38E3568009|DNase-H3K4me3;EH38E3568009|Low-DNase;EH38E3568009|pELS;EH38E3568009|pELS/CTCF-bound	16;15;53;3	EnhWk;TssFlnkD;TssFlnkU;TxWk;EnhA2;EnhA1;TssFlnk;TssA;Quies;TssBiv;EnhG1	251;410;614;212;26;26;87;18;16;2;1
cg01885503	cg01885503	-0.0280623	0.00616762	-4.54994	5.36604e-06	0.0256564	cg01885503_TC21	62757276	TAAAATTCRAATTCRATTCCTAAATCCATCCATACAAAATAACRATTTCC						cg	R	T	C	2	II	16	54287936	Human	GRCh38	CGGAAACCGTCACCTTGCATGGATGGATCCAGGAATCGAATTCGAATTCC	CCCCGGAGACAAAACGGGGGTGGTGACTCTGCCGTGGAGTGGCCAGCCCCAGCTCGGAGG[CG]GAAACCGTCACCTTGCATGGATGGATCCAGGAATCGAATTCGAATTCCACCAGAGTGGCG	CGCCACTCTGGTGGAATTCGAATTCGATTCCTGGATCCATCCATGCAAGGTGACGGTTTC[CG]CCTCCGAGCTGGGGCTGGCCACTCCACGGCAGAGTCACCACCCCCGTTTTGTCTCCGGGG	1	TSS1500	IRX3	NM_024336.3	chr16:54281690-54290692;chr16:54291128-54291791	Island;N_Shelf	TSS1500;TSS1500	ENSG00000177508.12;ENSG00000177508.12	ENST00000329734.4;ENST00000558180.2					FALSE		EH38D4947210	EH38E3181482|DNase-H3K4me3;EH38E3181482|DNase-only;EH38E3181482|Low-DNase;EH38E3181482|pELS	4;1;73;9	Quies;ReprPCWk;TssBiv;ReprPC;EnhWk;EnhBiv;TssFlnk;Het;TxWk;TssA;TssFlnkD;EnhA1;EnhA2;ZNF/Rpts;TssFlnkU	660;187;390;298;19;54;24;6;7;3;6;2;5;1;1	cg01885503
cg01897074	cg01897074	-0.0460798	0.0104889	-4.39319	1.11699e-05	0.0402484	cg01897074_TC21	7704849	CTAAATAACCTTTAAATACCCCAATCCACTTCAACTCAACTCTATTCTTC						cg	F	T	C	2	II	13	106560926	Human	GRCh38	CGAAGAATAGAGTTGAGTTGAAGTGGATTGGGGTATTTAAAGGTCACTTA	CTTTATAGTTTCTAAGTGACCTTTAAATACCCCAATCCACTTCAACTCAACTCTATTCTT[CG]GGATGATTCAATTCTCACCCAAGGGCTCTCATTTTCAACTCCTGTTACTTATTCAGTGAT	CTTTATAGTTTCTAAGTGACCTTTAAATACCCCAATCCACTTCAACTCAACTCTATTCTT[CG]GGATGATTCAATTCTCACCCAAGGGCTCTCATTTTCAACTCCTGTTACTTATTCAGTGAT	1													FALSE		EH38D4790828	EH38E3080036|dELS;EH38E3080036|Low-DNase	1;86	Quies;TxWk;EnhWk;ReprPCWk;EnhA2;TssFlnkU;EnhA1;TssFlnk;TssA;Tx;ReprPC;TssFlnkD;Het	764;747;121;3;10;1;4;4;1;2;1;3;2
cg01900755	cg01900755	-0.0546109	0.0119084	-4.5859	4.5204e-06	0.0233461	cg01900755_BC21	37713341	TATATCATACCACATAACCTAACCACTTATTAATTTTTAACTCTATCCTC						cg	F	B	C	2	II	6	63640275	Human	GRCh38	GTGTCATACCACATGGCCTAACCACTTATTAATTTTTGACTCTGTCCTCG	CTTTGTAGTATTGTGTCATACCACATGGCCTAACCACTTATTAATTTTTGACTCTGTCCT[CG]AAGGATGGATAACCCATGATTCATCTTTAGTGTTGTTATATCATAGTAGTTAAGAACTGA	TCAGTTCTTAACTACTATGATATAACAACACTAAAGATGAATCATGGGTTATCCATCCTT[CG]AGGACAGAGTCAAAAATTAATAAGTGGTTAGGCCATGTGGTATGACACAATACTACAAAG	1				chr6:63635585-63636560	S_Shelf								FALSE		EH38D3856032	EH38E2476491|DNase-H3K4me3;EH38E2476491|DNase-only;EH38E2476491|Low-DNase	1;6;80	Quies;EnhWk;TxWk;Het;TssFlnkD;EnhA1;EnhA2;TssFlnk;EnhG1;TssFlnkU	1048;403;140;44;10;10;4;2;1;1
cg01912286	cg01912286	-0.0567785	0.0122098	-4.65025	3.3154e-06	0.0193049	cg01912286_TC21	75752432	TACTTACATTCCACTTAAATAAAACAATCAACACATAACCAACCACCAAC						cg	F	T	C	2	II	9	109108562	Human	GRCh38	CGTTGGTGGTTGGCTATGTGTTGACTGTTTCATTCAAGTGGAATGCAAGC	GTAGCGTTCAGTGCTTGCATTCCACTTGAATGAAACAGTCAACACATAGCCAACCACCAA[CG]TCCAGATCTTAAATAAATGAAAGACACAGCTGTAAAATCTATACACGTGAAAATGAACAT	GTAGCGTTCAGTGCTTGCATTCCACTTGAATGAAACAGTCAACACATAGCCAACCACCAA[CG]TCCAGATCTTAAATAAATGAAAGACACAGCTGTAAAATCTATACACGTGAAAATGAACAT	1	exon_2	TMEM245	NM_032012.4			exon_2;TSS200	TMEM245;ENSG00000106771.13	ENST00000374586.8;ENST00000491854.1					FALSE		EH38D6053921	EH38E3900530|dELS;EH38E3900530|DNase-H3K4me3;EH38E3900530|DNase-only;EH38E3900530|Low-DNase	8;2;1;76	Quies;Het;EnhA1;TxWk;EnhWk;EnhA2;TssFlnkU;TssA;TssFlnk;TssFlnkD;ReprPCWk	868;5;261;220;128;131;37;4;1;7;1
cg01917681	cg01917681	-0.0366905	0.00806817	-4.54756	5.42722e-06	0.0258693	cg01917681_BC21	31764916	CCTAAACCAAAACAACAAATACATAACACTTATAATACCACTTCTACCTC						cg	F	B	C	2	II	12	68367317	Human	GRCh38	CTAAACCAAGACAGCAAATACATGGCACTTGTGATGCCACTTCTGCCTCG	AGGAAGAATGTCCTAAACCAAGACAGCAAATACATGGCACTTGTGATGCCACTTCTGCCT[CG]TATACACATAACTGACATCACTAAATGACTGGCACCATTGCCAGCTGAGCCTGGATGCAG	CTGCATCCAGGCTCAGCTGGCAATGGTGCCAGTCATTTAGTGATGTCAGTTATGTGTATA[CG]AGGCAGAAGTGGCATCACAAGTGCCATGTATTTGCTGTCTTGGTTTAGGACATTCTTCCT	1									chr12:68367258-68367383				FALSE		EH38D4705591	EH38E3025656|dELS;EH38E3025656|Low-DNase	1;86	Quies;TxWk;EnhWk;EnhA1;ReprPCWk;EnhA2;TssFlnkD	1322;134;52;91;28;35;1
cg01928418	cg01928418	-0.0456863	0.00701117	-6.51621	7.21048e-11	2.8865e-05	cg01928418_TC21	30769922	CTAAACCAATCAACTCCCTATAAACCTTAACCTTTACCCTAAAAACATAC						cg	F	T	C	2	II	22	41414661	Human	GRCh38	CGCATGCTCCCAGGGCAAAGGCCAAGGTCCACAGGGAGCTGACTGGCCCA	GTGGTGCCCAGCTGGGCCAGTCAGCTCCCTGTGGACCTTGGCCTTTGCCCTGGGAGCATG[CG]GTGCAGGCCTGCCCTGTGGCTCAGCAGCTGCAGAATGGCTGGTGTTCTGTGGCCTGGTGA	GTGGTGCCCAGCTGGGCCAGTCAGCTCCCTGTGGACCTTGGCCTTTGCCCTGGGAGCATG[CG]GTGCAGGCCTGCCCTGTGGCTCAGCAGCTGCAGAATGGCTGGTGTTCTGTGGCCTGGTGA	1				chr22:41413464-41414259	S_Shore				chr22:41413423-41414692		22:41809304-41810731	Promoter_Associated	TRUE		EH38D5405503	EH38E3483559|dELS;EH38E3483559|dELS/CTCF-bound;EH38E3483559|Low-DNase	49;1;37	Quies;TssFlnkU;TxWk;TssA;TssFlnk;EnhA1;TssFlnkD;EnhA2;ReprPCWk;EnhWk;Tx;EnhG2	750;736;64;49;15;9;19;8;6;4;2;1	cg01928418
cg01928659	cg01928659	-0.0385128	0.00696512	-5.52939	3.21351e-08	0.0011725	cg01928659_BC21	91778212	ATTTTAAAATTTTCTACTTCCTACCCTAAATCTAATTCTAAACCACTCCC						cg	R	B	C	2	II	10	133009449	Human	GRCh38	TTTTAAAGTTTTCTACTTCCTGCCCTGGGTCTGGTTCTGGGCCACTCCCG	GTTACCCACACTTGAATGTGAGTGACGCCCTCAGGCCACCAAGGGCGTGACTCTCCCACA[CG]GGAGTGGCCCAGAACCAGACCCAGGGCAGGAAGTAGAAAACTTTAAAATATTTTGGTCTG	GTTACCCACACTTGAATGTGAGTGACGCCCTCAGGCCACCAAGGGCGTGACTCTCCCACA[CG]GGAGTGGCCCAGAACCAGACCCAGGGCAGGAAGTAGAAAACTTTAAAATATTTTGGTCTG	1				chr10:133008229-133008433;chr10:133012626-133013339	S_Shore;N_Shelf								FALSE		EH38D2411719	EH38E1512823|dELS;EH38E1512823|dELS/CTCF-bound;EH38E1512823|DNase-only;EH38E1512823|Low-DNase	17;1;32;37	Quies;ReprPCWk;EnhA1;EnhA2;EnhWk;Het;TxWk;ZNF/Rpts;EnhBiv;ReprPC;EnhG1;TssFlnkU;TssA	1015;119;116;87;84;146;9;71;6;7;1;1;1
cg01937395	cg01937395	-0.0507505	0.00888173	-5.71403	1.10329e-08	0.000650639	cg01937395_TC21	80640307	ACACAAAAATTACTAAAACCTAACAACAAAAATTACAAAAAACTAAAATC						cg	F	T	C	2	II	22	49822378	Human	GRCh38	CGATTTCAGCTCTCTGCAACCTCTGCTGCCAGGTTCCAGCAATTCTTGTG	AGGAGGCTGAGACACAAGAATTGCTGGAACCTGGCAGCAGAGGTTGCAGAGAGCTGAAAT[CG]TGCCACTACACTCCAGCCTGGGCAACAGAGCAAAACCCTATTTAAAAAAAAAAAAGGCTG	AGGAGGCTGAGACACAAGAATTGCTGGAACCTGGCAGCAGAGGTTGCAGAGAGCTGAAAT[CG]TGCCACTACACTCCAGCCTGGGCAACAGAGCAAAACCCTATTTAAAAAAAAAAAAGGCTG	1				chr22:49823509-49824015	N_Shore								FALSE		EH38D5417831			Het;TxWk;Tx;ReprPCWk;Quies;ReprPC;ZNF/Rpts;EnhG1;TssFlnk	100;238;561;394;293;12;28;36;1	cg01937395
cg01937809	cg01937809	-0.0475171	0.0104872	-4.53095	5.87188e-06	0.0272326	cg01937809_BC21	60715437	CTCCACTCCTCTCCTATAATATAAAACAAAACTATAAAAAAAACCAACCC						cg	F	B	C	2	II	1	37476253	Human	GRCh38	TCCACTCCTCTCCTGTAATGTGAGGCAGGGCTGTAAAGGGGACCAGCCCG	CAGCACTGTGTCTCCACTCCTCTCCTGTAATGTGAGGCAGGGCTGTAAAGGGGACCAGCC[CG]TGGGCAGCTGCTCACTCACCCCTCGGAACCTGATCTCAGGTGGGTGTTGTGAGGAGGGAG	CTCCCTCCTCACAACACCCACCTGAGATCAGGTTCCGAGGGGTGAGTGAGCAGCTGCCCA[CG]GGCTGGTCCCCTTTACAGCCCTGCCTCACATTACAGGAGAGGAGTGGAGACACAGTGCTG	1				chr1:37474122-37474620	S_Shore						1:37941673-37942038	Promoter_Associated	TRUE		EH38D4369725	EH38E2803651|Low-DNase;EH38E2803651|pELS	72;15	Quies;ReprPCWk;TssFlnkU;TssFlnkD;TssA;EnhG2;EnhA1;TxWk;EnhA2;EnhG1;Het;ReprPC;EnhWk;TssFlnk	677;107;453;23;87;217;18;44;8;9;4;2;9;5	cg01937809
cg01946790	cg01946790	-0.0490002	0.0103119	-4.7518	2.01612e-06	0.0140611	cg01946790_TC21	63715438	ACTAAAATAAATCCTACTATCTACAAATTCATCCTAACTAAATCACAATC						cg	F	T	C	2	II	13	30377450	Human	GRCh38	CGACTGTGATTCAGTCAGGATGAATCTGCAGACAGCAGGATCCACTCTAG	TTTCTACTATAACTAGAGTGGATCCTGCTGTCTGCAGATTCATCCTGACTGAATCACAGT[CG]CTGTCCTCATGTTGTCCATAAGGAAGACAATAAATAATGACAAAGCAGCATGTCATTCTG	TTTCTACTATAACTAGAGTGGATCCTGCTGTCTGCAGATTCATCCTGACTGAATCACAGT[CG]CTGTCCTCATGTTGTCCATAAGGAAGACAATAAATAATGACAAAGCAGCATGTCATTCTG	1						TSS1500;TSS1500;TSS1500;TSS1500	ENSG00000238121.7;ENSG00000238121.7;ENSG00000238121.7;ENSG00000238121.7	ENST00000654979.1;ENST00000420219.5;ENST00000693355.1;ENST00000416261.2					FALSE		EH38D4756345	EH38E3058594|Low-DNase;EH38E3058594|pELS	85;2	Quies;EnhA1;EnhA2;TxWk;TssFlnkU;ZNF/Rpts;EnhWk;ReprPCWk;Het;TssA	1319;44;20;88;61;3;86;25;16;1
cg01949024	cg01949024	-0.0394241	0.00754381	-5.22602	1.73198e-07	0.00330224	cg01949024_BC21	5603431	TACAACCTTCAAATTAACCCTACTATTCCCAAACCACAAAACCCCAAAAC						cg	R	B	C	2	II	17	44841079	Human	GRCh38	GCAGCCTTCAGATTGACCCTACTGTTCCCAAACCACAGAGCCCCAGGGCG	TTTAATCCACATGGGGCTCAGGCAGGAAAGGATCAAAACCCAATTTGAGAACTTGAGAGT[CG]CCCTGGGGCTCTGTGGTTTGGGAACAGTAGGGTCAATCTGAAGGCTGCAATGTGTCACTA	TTTAATCCACATGGGGCTCAGGCAGGAAAGGATCAAAACCCAATTTGAGAACTTGAGAGT[CG]CCCTGGGGCTCTGTGGTTTGGGAACAGTAGGGTCAATCTGAAGGCTGCAATGTGTCACTA	1													FALSE		EH38D2935109			TxWk;Quies;ReprPCWk;Tx;EnhWk;EnhA2;EnhG1;ReprPC	499;1036;64;17;34;10;2;1
cg01950449	cg01950449	-0.0327618	0.00711199	-4.60656	4.09393e-06	0.0219019	cg01950449_BC21	91769837	ATCTTCCTAACCTCAAAACTAAATTACATATCCTTAATAAAAACTACCAC						cg	R	B	C	2	II	13	29496353	Human	GRCh38	TCTTCCTGGCCTCAGGACTGGGTTGCATGTCCTTAATAGGAGCTGCCACG	GCCAGTCTGGCCACGGGGCAGGTCTGAGCAGGGAGGAGGAGACTGTGTGGACTCAGCTTA[CG]TGGCAGCTCCTATTAAGGACATGCAACCCAGTCCTGAGGCCAGGAAGACTGTGTGGGAGC	GCCAGTCTGGCCACGGGGCAGGTCTGAGCAGGGAGGAGGAGACTGTGTGGACTCAGCTTA[CG]TGGCAGCTCCTATTAAGGACATGCAACCCAGTCCTGAGGCCAGGAAGACTGTGTGGGAGC	1						exon_1;TSS200	MTUS2;ENSG00000132938.22	ENST00000400542.3;ENST00000467990.1					FALSE		EH38D4755652	EH38E3058093|CTCF-only/CTCF-bound;EH38E3058093|dELS;EH38E3058093|dELS/CTCF-bound;EH38E3058093|DNase-H3K4me3;EH38E3058093|DNase-only;EH38E3058093|Low-DNase	2;4;4;1;7;69	ZNF/Rpts;Quies;EnhWk;Het;ReprPCWk;TssFlnkD;EnhBiv;EnhA1;ReprPC;EnhA2;TssFlnkU;TxWk;TssFlnk;TssBiv;TssA	195;472;260;347;82;16;96;38;82;15;37;18;2;2;1
cg01958008	cg01958008	-0.0444312	0.00941056	-4.72142	2.34203e-06	0.0155369	cg01958008_TC21	50688853	TTTAAAATTAAACTATAAACTCATTCCTTCCCAAAATTAATTCAACCTAC						cg	R	T	C	2	II	3	128878313	Human	GRCh38	CGTAGGCTGAACTAACCTTGGGAAGGAATGAGTTTATAGTTTAACTTCAA	TCTGACCTAACCAACTCCATCTTGCTTCTAACCTCCAAGCTGTCCTTGTTCATTCCTGAG[CG]TAGGCTGAACTAACCTTGGGAAGGAATGAGTTTATAGTTTAACTTCAAAACAAAAATAGC	GCTATTTTTGTTTTGAAGTTAAACTATAAACTCATTCCTTCCCAAGGTTAGTTCAGCCTA[CG]CTCAGGAATGAACAAGGACAGCTTGGAGGTTAGAAGCAAGATGGAGTTGGTTAGGTCAGA	1	TSS1500;TSS1500	ACAD9;ACAD9	NM_014049.5;NR_033426.2	chr3:128879333-128879860	N_Shore	TSS1500;TSS1500;TSS1500;TSS1500;TSS1500;TSS1500;TSS1500;TSS1500;TSS1500;TSS1500;TSS1500;TSS1500;TSS1500;TSS1500;TSS1500;TSS1500;TSS1500;TSS1500;TSS1500;TSS1500;TSS1500;TSS1500;TSS1500;TSS1500;TSS1500;TSS1500	ENSG00000177646.20;ENSG00000177646.20;ENSG00000177646.20;ENSG00000177646.20;ENSG00000177646.20;ENSG00000177646.20;ENSG00000177646.20;ENSG00000177646.20;ENSG00000177646.20;ENSG00000177646.20;ENSG00000177646.20;ENSG00000177646.20;ENSG00000177646.20;ENSG00000177646.20;ENSG00000177646.20;ENSG00000177646.20;ENSG00000177646.20;ENSG00000177646.20;ENSG00000177646.20;ENSG00000177646.20;ENSG00000177646.20;…	ENST00000505602.1;ENST00000679613.1;ENST00000681367.1;ENST00000681583.1;ENST00000514643.5;ENST00000681784.1;ENST00000681319.1;ENST00000681585.1;ENST00000511325.2;ENST00000680636.1;ENST00000512801.5;ENST00000308982.12;ENST00000505192.5;ENST00000511227.5;ENST00000681552.1;ENST00000679399.1;ENST00000515429.1;ENST00000514336.1;ENST00000679990.1;ENST00000681886.1;ENST00000679431.1;ENST00000680764.1;EN…					FALSE					TxWk;EnhA1;EnhWk;Quies;EnhA2;TssFlnkD;TssFlnkU;TssA;TssFlnk;EnhG2;EnhG1;ReprPCWk;Tx	389;175;690;49;45;165;83;7;48;2;7;1;2	cg01958008
cg01974375	cg01974375	-0.037513	0.00789032	-4.7543	1.99135e-06	0.0139302	cg01974375_BC21	62767271	ATTTAACAATACCCTTCCCATTCAAAATTTCCAACTTTAACACCTCCCTC						cg	R	B	C	2	II	1	151326478	Human	GRCh38	TTTGACAGTGCCCTTCCCATTCAGGATTTCCAACTTTGACACCTCCCTCG	CATGAAGCCCACGGGAAAAACAGAACAAATGTCACAAGGATCAGAGAAATCCCTGAAACT[CG]AGGGAGGTGTCAAAGTTGGAAATCCTGAATGGGAAGGGCACTGTCAAATCTCTCCCCTAC	CATGAAGCCCACGGGAAAAACAGAACAAATGTCACAAGGATCAGAGAAATCCCTGAAACT[CG]AGGGAGGTGTCAAAGTTGGAAATCCTGAATGGGAAGGGCACTGTCAAATCTCTCCCCTAC	1				chr1:151328046-151328248	N_Shore	TSS1500	ENSG00000273481.1	ENST00000609583.1			1:151298798-151298969	Unclassified	TRUE					Quies;TssFlnkU;TssFlnk;EnhA1;TssFlnkD;Het;TxWk;TssA;EnhA2;EnhWk;ReprPCWk	799;486;44;24;198;19;16;39;8;24;6	cg01974375
cg01975156	cg01975156	-0.0463481	0.0104833	-4.42114	9.81826e-06	0.0372297	cg01975156_BC21	4715972	ATATCTAAATACCATACCTAAACRAATTACCACTTAAAATTAATCATCAC						cg	F	B	C	2	II	4	15781779	Human	GRCh38	TATCTGGATACCATGCCTGGGCGAATTGCCACTTAAAATTAATCATCACG	TGTTTGACCAAATATCTGGATACCATGCCTGGGCGAATTGCCACTTAAAATTAATCATCA[CG]TACATGTTTTAAGGTTTTGTTACACAAGACCTCACTTCCAAGTATCACTTTCTGTTTTGG	CCAAAACAGAAAGTGATACTTGGAAGTGAGGTCTTGTGTAACAAAACCTTAAAACATGTA[CG]TGATGATTAATTTTAAGTGGCAATTCGCCCAGGCATGGTATCCAGATATTTGGTCAAACA	1				chr4:15778375-15779106	S_Shelf								FALSE		EH38D5547862	EH38E3575087|dELS;EH38E3575087|DNase-H3K4me3;EH38E3575087|DNase-only;EH38E3575087|Low-DNase	4;1;1;81	ReprPC;ReprPCWk;EnhBiv;EnhWk;TssFlnk;Quies;EnhA1;EnhG1;TssFlnkD;EnhG2;TssBiv;TssA;TxWk;TssFlnkU;EnhA2	310;492;62;134;24;342;25;13;74;15;56;7;51;39;19
cg01985390	cg01985390	-0.0380973	0.00756072	-5.03884	4.68359e-07	0.00592721	cg01985390_TC21	2661317	ATTCRCTCCTAACATCACAAAAATACCCAATAAAAATTCATTTAACTTCC						cg	R	T	C	2	II	2	27307113	Human	GRCh38	CGGAAGCCAAATGAACCCCTATTGGGCACCTCTGTGATGCCAGGAGCGAA	GCTTCGAAGGCGACCCGCCCACCATCCTGCCCTTCCCAGAACCTGAGACCGTCTGGGGGG[CG]GAAGCCAAATGAACCCCTATTGGGCACCTCTGTGATGCCAGGAGCGAACTGGTGAGCCCA	TGGGCTCACCAGTTCGCTCCTGGCATCACAGAGGTGCCCAATAGGGGTTCATTTGGCTTC[CG]CCCCCCAGACGGTCTCAGGTTCTGGGAAGGGCAGGATGGTGGGCGGGTCGCCTTCGAAGC	1	3UTR;exon_10;3UTR;exon_9	TRIM54;TRIM54;TRIM54;TRIM54	NM_032546.4;NM_032546.4;NM_187841.3;NM_187841.3	chr2:27306215-27308597	Island	exon_9;exon_10;3UTR;3UTR	TRIM54;TRIM54;TRIM54;TRIM54	ENST00000380075.7;ENST00000296098.4;ENST00000296098.4;ENST00000380075.7			2:27529290-27530288	Unclassified_Cell_type_specific	TRUE		EH38D5175246	EH38E3332924|DNase-H3K4me3;EH38E3332924|DNase-only;EH38E3332924|Low-DNase	1;2;84	TxWk;EnhWk;ReprPC;TssBiv;EnhBiv;EnhA2;ReprPCWk;Quies;EnhG1;TssFlnk;EnhA1;TssFlnkD;TssFlnkU;Tx	641;114;371;166;220;27;28;25;28;7;12;7;10;7	cg01985390
cg01991752	cg01991752	-0.0358743	0.00794677	-4.51433	6.3518e-06	0.0287369	cg01991752_BC21	51675835	AAACCCTAACTCTACCCAAATATACTATAAAACCTTAAACAAAAACCCRC						cg	F	B	C	2	II	14	100547811	Human	GRCh38	AACCCTGACTCTGCCCAGATGTGCTGTGGGACCTTGGGCAAAAGCCCGCG	GAGAGGGCCTGGAACCCTGACTCTGCCCAGATGTGCTGTGGGACCTTGGGCAAAAGCCCG[CG]TTCTTGTGATATTCCCGACCCAAACCCAAGCGAGGGGAGTAGAGGGCAGGCAGGAGGCTC	GAGCCTCCTGCCTGCCCTCTACTCCCCTCGCTTGGGTTTGGGTCGGGAATATCACAAGAA[CG]CGGGCTTTTGCCCAAGGTCCCACAGCACATCTGGGCAGAGTCAGGGTTCCAGGCCCTCTC	1	5UTR;exon_1	BEGAIN;BEGAIN	NM_001385104.1;NM_001385104.1	chr14:100546304-100546763	S_Shore	exon_1	BEGAIN	ENST00000556751.5					FALSE					TxWk;Quies;ReprPC;EnhA1;TssA;EnhBiv;TssFlnkU;ReprPCWk;EnhWk;EnhA2;TssFlnkD;TssFlnk;EnhG1	365;406;69;256;6;159;125;82;127;57;5;4;2	cg01991752
cg02006119	cg02006119	-0.0315582	0.00719755	-4.38458	1.1621e-05	0.0411433	cg02006119_BC21	33775182	TACATATACCATAACTACATAAACATAACAACTACATATACCATAACTAC						cg	R	B	C	2	II	18	13302730	Human	GRCh38	GCATGTACCATAACTGCATAAACATAACAACTGCATGTACCATAACTGCG	AACGCCTTGCTAGCTCTGCAACTACAGAGGGAAAGGAGGAAAACATGCACTGCTGTTACA[CG]CAGTTATGGTACATGCAGTTGTTATGTTTATGCAGTTATGGTACATGCAGTTACTGTTAC	AACGCCTTGCTAGCTCTGCAACTACAGAGGGAAAGGAGGAAAACATGCACTGCTGTTACA[CG]CAGTTATGGTACATGCAGTTGTTATGTTTATGCAGTTATGGTACATGCAGTTACTGTTAC	1													FALSE					EnhA1;ReprPCWk;EnhWk;Quies;TxWk;EnhA2;TssFlnkD;ReprPC;TssFlnkU;Het;TssFlnk;EnhBiv	191;46;670;638;34;10;36;8;10;16;2;2
cg02010738	cg02010738	-0.0844557	0.0184158	-4.58605	4.51716e-06	0.0233461	cg02010738_TC11	7724863	AAAAACCCTACCAACAACTTTAAAAACCCCAAACAAAAAAAACCTATTCA	86763462	AAAAACCCTACCAACGACTTTAAAAACCCCGAACAAAAAAAACCTATTCG	A	Red	R	cg	F	T	C	1	I	19	2095467	Human	GRCh38	CGAATAGGCCCTTCTTGCTCGGGGTCCCCAAAGTCGCTGGCAGGGCCCCC	CTTCCGGGGTGGGGGGGCCCTGCCAGCGACTTTGGGGACCCCGAGCAAGAAGGGCCTATT[CG]AAAGGGCCCGACCGCCGCGTTGGCTTGGGGATCCTGAAGCCCTGCAGAATTTTAATCCAC	CTTCCGGGGTGGGGGGGCCCTGCCAGCGACTTTGGGGACCCCGAGCAAGAAGGGCCTATT[CG]AAAGGGCCCGACCGCCGCGTTGGCTTGGGGATCCTGAAGCCCTGCAGAATTTTAATCCAC	1	TSS1500;TSS1500;TSS1500	IZUMO4;IZUMO4;IZUMO4	NM_001363588.2;NM_001031735.3;NM_001039846.2	chr19:2095396-2095728;chr19:2096044-2097492	Island;N_Shore	TSS1500;TSS1500;TSS1500;TSS1500;TSS1500;TSS1500;TSS1500;TSS1500;TSS1500	ENSG00000099840.14;ENSG00000099840.14;ENSG00000099840.14;ENSG00000099840.14;ENSG00000099840.14;ENSG00000099840.14;ENSG00000099840.14;ENSG00000099840.14;ENSG00000099840.14	ENST00000481489.5;ENST00000497445.5;ENST00000478879.5;ENST00000395307.6;ENST00000498554.5;ENST00000590985.2;ENST00000395301.8;ENST00000620263.4;ENST00000395296.5					FALSE		EH38D5098239	EH38E3281912|Low-DNase;EH38E3281912|pELS;EH38E3281912|pELS/CTCF-bound	72;11;4	TssFlnkU;TssFlnkD;TssA;TssFlnk;EnhA1;TxWk;EnhA2;EnhWk;Quies	884;42;587;116;6;10;4;4;10	cg02010738
cg02019508	cg02019508	-0.0564007	0.00986835	-5.71531	1.09505e-08	0.000649558	cg02019508_TC21	34682456	TACAACTAATACAATTCCTTATATCAATAAATTCACTAAACRCTCRATAC						cg	F	T	C	2	II	12	53601370	Human	GRCh38	CGCATCGAGCGTTCAGTGAATTTATTGACATAAGGAACTGCACTAGTTGT	GTCTGTTGAATTACAACTAGTGCAGTTCCTTATGTCAATAAATTCACTGAACGCTCGATG[CG]GAAGCCATATTTCTGAACGAGAGAAGACCAAAATTTGTCATTTAATTAATTAAGGGATTA	GTCTGTTGAATTACAACTAGTGCAGTTCCTTATGTCAATAAATTCACTGAACGCTCGATG[CG]GAAGCCATATTTCTGAACGAGAGAAGACCAAAATTTGTCATTTAATTAATTAAGGGATTA	1													FALSE		EH38D4695603	EH38E3018861|dELS;EH38E3018861|Low-DNase	1;86	TxWk;EnhWk;Quies;TssFlnkU;EnhA1;ReprPCWk;EnhA2;TssFlnkD;ReprPC;TssFlnk;Tx;TssA	584;137;583;152;99;20;30;26;4;14;5;9	cg02019508
cg02019955	cg02019955	-0.0333192	0.00639915	-5.20681	1.92111e-07	0.00348279	cg02019955_BC21	55775556	AAAACAAACAATCTTTACTATTCTACAATCATTACTATTCTACAACCTCC						cg	F	B	C	2	II	9	78201767	Human	GRCh38	GAACAGACAATCTTTGCTGTTCTGCAATCATTGCTGTTCTGCAGCCTCCG	TTCCAGAGGAAGGAACAGACAATCTTTGCTGTTCTGCAATCATTGCTGTTCTGCAGCCTC[CG]CTGGTGATACCCAGGCAAACAGGGTCTGGCGTGGACCTCCAACAAACTCCAGCAGACCTG	CAGGTCTGCTGGAGTTTGTTGGAGGTCCACGCCAGACCCTGTTTGCCTGGGTATCACCAG[CG]GAGGCTGCAGAACAGCAATGATTGCAGAACAGCAAAGATTGTCTGTTCCTTCCTCTGGAA	1													FALSE					Quies;EnhWk;ReprPCWk;TxWk;Het;EnhA1;ZNF/Rpts;ReprPC	1563;58;25;5;7;1;3;1
cg02021012	cg02021012	-0.0119066	0.00265366	-4.48685	7.22847e-06	0.0310045	cg02021012_BC21	25681507	AACAATATTTCAATAAAATCTCTCCTTCCTAAACTTAAACTTTCTATAAC						cg	F	B	C	2	II	18	32379383	Human	GRCh38	ACAATATTTCAATGGAGTCTCTCCTTCCTAGACTTGGACTTTCTATGACG	GGACCTGCAGCAACAATATTTCAATGGAGTCTCTCCTTCCTAGACTTGGACTTTCTATGA[CG]TTGCCCAAACTTAAAAATGCTGGGAAGGGGCCAGGCACGATGGCTCATGCCTGTAATCCC	GGGATTACAGGCATGAGCCATCGTGCCTGGCCCCTTCCCAGCATTTTTAAGTTTGGGCAA[CG]TCATAGAAAGTCCAAGTCTAGGAAGGAGAGACTCCATTGAAATATTGTTGCTGCAGGTCC	1													FALSE		EH38D5068526			Quies;TxWk;EnhA2;EnhWk;EnhA1;ReprPCWk;EnhG1	1199;295;59;22;57;30;1
cg02025412	cg02025412	-0.0361968	0.00696073	-5.20015	1.99125e-07	0.00355596	cg02025412_BC21	85745149	TAAAAAACACAAATCCTTAACTCCCCAAAAAAACACAACCTCAAAAAACC						cg	R	B	C	2	II	12	52022759	Human	GRCh38	GGGAGGCACAGGTCCTTAGCTCCCCAAGAAGACACAGCCTCAGGGGGCCG	CTGGAGATCTCTGAGCTCCCTCCCACACAGATCCTTGGGACTCTAAATACTGGCCGAACT[CG]GCCCCCTGAGGCTGTGTCTTCTTGGGGAGCTAAGGACCTGTGCCTCCCACTGGCCCGGAA	CTGGAGATCTCTGAGCTCCCTCCCACACAGATCCTTGGGACTCTAAATACTGGCCGAACT[CG]GCCCCCTGAGGCTGTGTCTTCTTGGGGAGCTAAGGACCTGTGCCTCCCACTGGCCCGGAA	1	TSS200	NR4A1	NM_001202233.2	chr12:52023234-52023919	N_Shore	TSS200;TSS200	ENSG00000123358.20;ENSG00000123358.20	ENST00000548977.5;ENST00000360284.7					FALSE		EH38D2559144	EH38E1612137|Low-DNase;EH38E1612137|PLS	86;1	Quies;EnhBiv;ReprPCWk;ReprPC;TxWk;TssBiv;EnhWk;EnhA1;TssFlnkD;TssFlnk;TssFlnkU;TssA;EnhA2	814;99;116;288;124;61;49;9;56;10;30;1;6
cg02037342	cg02037342	-0.0319396	0.00718442	-4.44568	8.76143e-06	0.0347147	cg02037342_BC21	39805455	CCCTAAAAAATAACTTACTATATATATTAACACTATAAACCCTACCCTAC						cg	F	B	C	2	II	22	36332035	Human	GRCh38	CCTGGGGGGTGGCTTGCTATATGTGTTGGCACTGTGAGCCCTGCCCTGCG	TCCAGAGTGGCCCCTGGGGGGTGGCTTGCTATATGTGTTGGCACTGTGAGCCCTGCCCTG[CG]TTGCCAGGATGGCTTGATCAGAGTTGCACAAATGGGGCTGAGAACTCAGGTCTCTGGAAA	TTTCCAGAGACCTGAGTTCTCAGCCCCATTTGTGCAACTCTGATCAAGCCATCCTGGCAA[CG]CAGGGCAGGGCTCACAGTGCCAACACATATAGCAAGCCACCCCCCAGGGGCCACTCTGGA	1									chr22:36331437-36332405		22:36727411-36729627	Promoter_Associated	TRUE		EH38D5398636	EH38E3478722|dELS;EH38E3478722|dELS/CTCF-bound;EH38E3478722|Low-DNase	33;10;44	Quies;EnhWk;TssFlnkU;EnhA1;EnhG2;EnhA2;TxWk;ReprPC;Tx;ReprPCWk;TssFlnkD;TssA;EnhG1	697;8;262;406;139;19;92;1;26;7;1;3;2
cg02060682	cg02060682	-0.0651797	0.0130219	-5.00541	5.57438e-07	0.00656709	cg02060682_TC21	96762291	TAACACCACTACTTTAAAAATCAATTTAAAAATTTCCTAAAAAATTAAAC						cg	R	T	C	2	II	7	36151115	Human	GRCh38	CGTTTAACTTCTTAGGAAACTTCCAAACTGATTTCCAAAGTAGTGGTGCC	TTTTCCTTTTTCTTTGGTAAATACCTATAAGTAGATTGGTTGAGTCATATGGTAAGTATA[CG]TTTAACTTCTTAGGAAACTTCCAAACTGATTTCCAAAGTAGTGGTGCCATCTTACACCTC	GAGGTGTAAGATGGCACCACTACTTTGGAAATCAGTTTGGAAGTTTCCTAAGAAGTTAAA[CG]TATACTTACCATATGACTCAACCAATCTACTTATAGGTATTTACCAAAGAAAAAGGAAAA	1				chr7:36152739-36153825	N_Shore								FALSE					Quies;ReprPCWk;TxWk;ReprPC;Het;EnhA2;EnhWk	1513;39;97;1;4;5;4	cg02060682
cg02063736	cg02063736	-0.0453906	0.00992294	-4.57431	4.77803e-06	0.0239953	cg02063736_TC21	2753483	ACAATCCCAACCCTCCAACRAAAATAAACRAAAATCTCAAAAATAACATC						cg	R	T	C	2	II	20	35739462	Human	GRCh38	CGATGCCATTCCTGAGATCTTCGCCCATTTCCGTTGGAGGGTTGGGACTG	ATTTCTGCCTAAGCCCCAAGTGGCCATGCTAGCAGCCAGCCACTATCGATTTCCTGTGAC[CG]ATGCCATTCCTGAGATCTTCGCCCATTTCCGTTGGAGGGTTGGGACTGTAAGAGCTTGAT	ATCAAGCTCTTACAGTCCCAACCCTCCAACGGAAATGGGCGAAGATCTCAGGAATGGCAT[CG]GTCACAGGAAATCGATAGTGGCTGGCTGCTAGCATGGCCACTTGGGGCTTAGGCAGAAAT	1				chr20:35741568-35742641	N_Shelf	exon_2;exon_3;exon_4;TSS1500;TSS200;TSS1500;TSS1500	RBM39;RBM39;RBM39;ENSG00000131051.24;ENSG00000131051.24;ENSG00000131051.24;ENSG00000131051.24	ENST00000463004.5;ENST00000416529.5;ENST00000463098.5;ENST00000461283.5;ENST00000481037.5;ENST00000477334.1;ENST00000487604.1					FALSE		EH38D5324790	EH38E3429670|dELS/CTCF-bound;EH38E3429670|DNase-H3K4me3;EH38E3429670|DNase-H3K4me3/CTCF-bound;EH38E3429670|DNase-only;EH38E3429670|Low-DNase	1;2;2;1;81	Quies;EnhG1;Tx;EnhG2;TssFlnk;TssFlnkD;TxWk;ReprPCWk;EnhA1;EnhWk;TssA;TssFlnkU	780;301;41;344;26;90;40;19;2;12;7;1
cg02071600	cg02071600	0.0492742	0.0101722	4.844	1.27251e-06	0.0104429	cg02071600_TC21	90692232	AATTCTACATTTCCCTACTTATAAACTCATTTTATAAAATAAAATTAATC						cg	R	T	C	2	II	5	79513029	Human	GRCh38	CGATCAACTCTATTCCACAAAATGAGTCTACAAGTAGGGAAATGCAGAAT	AACGTTCAAACAGAGGCGGCATTTGCTTATTCGAGTTAAAATGCTTTGCGGAGGAGACAG[CG]ATCAACTCTATTCCACAAAATGAGTCTACAAGTAGGGAAATGCAGAATCCGGCTTCACCG	CGGTGAAGCCGGATTCTGCATTTCCCTACTTGTAGACTCATTTTGTGGAATAGAGTTGAT[CG]CTGTCTCCTCCGCAAAGCATTTTAACTCGAATAAGCAAATGCCGCCTCTGTTTGAACGTT	1	exon_1;5UTR;exon_1;5UTR;exon_1;5UTR	HOMER1;HOMER1;HOMER1;HOMER1;HOMER1;HOMER1	NM_001277077.1;NM_001277077.1;NM_001277078.1;NM_001277078.1;NM_004272.5;NM_004272.5	chr5:79513524-79514645	N_Shore	exon_1;5UTR;TSS1500;TSS1500;TSS1500	HOMER1;HOMER1;ENSG00000152413.15;ENSG00000152413.15;ENSG00000152413.15	ENST00000334082.11;ENST00000334082.11;ENST00000282260.10;ENST00000508576.5;ENST00000535690.1					FALSE		EH38D5660907	EH38E3645418|DNase-H3K4me3;EH38E3645418|Low-DNase;EH38E3645418|pELS;EH38E3645418|pELS/CTCF-bound	1;75;10;1	EnhA1;Quies;TssFlnkU;EnhA2;TssA;TxWk;TssBiv;TssFlnkD;EnhWk;TssFlnk;EnhBiv;ReprPCWk;Tx	46;430;178;95;190;149;361;24;108;69;10;1;2	cg02071600
cg02072495	cg02072495	-0.064363	0.0140447	-4.58272	4.58965e-06	0.0234885	cg02072495_BC21	14603410	CTATACAACTAACCCCACTACTAATATAAAAAACTTAAATTCCATCAACC						cg	R	B	C	2	II	15	60397086	Human	GRCh38	TGTGCAGCTGGCCCCACTGCTGGTGTGGAGGGCTTGGGTTCCATCAGCCG	CTTAAGCCACCTTCCCAGATGAGGAAACTTATCTGTGTTCCCCTCCTTCTTCTCAACAGC[CG]GCTGATGGAACCCAAGCCCTCCACACCAGCAGTGGGGCCAGCTGCACAGAGCGGCCAGAA	CTTAAGCCACCTTCCCAGATGAGGAAACTTATCTGTGTTCCCCTCCTTCTTCTCAACAGC[CG]GCTGATGGAACCCAAGCCCTCCACACCAGCAGTGGGGCCAGCTGCACAGAGCGGCCAGAA	1				chr15:60397550-60398231;chr15:60398509-60398731	N_Shore;N_Shore						15:60689255-60689526	Unclassified_Cell_type_specific	TRUE		EH38D4879534	EH38E3137548|DNase-H3K4me3;EH38E3137548|Low-DNase;EH38E3137548|pELS;EH38E3137548|pELS/CTCF-bound	2;17;65;3	Quies;ReprPCWk;TssA;TssBiv;TssFlnkD;TssFlnkU;TssFlnk;TxWk;ReprPC;EnhA2;Het;EnhBiv;EnhA1;EnhG2;EnhWk	519;278;411;90;18;274;22;6;17;5;10;4;4;2;3	cg02072495
cg02097429	cg02097429	-0.0761508	0.0157842	-4.82451	1.40348e-06	0.0110872	cg02097429_TC21	71807580	TTAATCAAAAACCTATAATTTAAATATATCCAAATATACTAAAAACATTC						cg	R	T	C	2	II	16	27199674	Human	GRCh38	CGAATGCTCCCAGCACACTTGGATATATTTAAATTACAGGCTTCTGATCA	TTGCAAGTTTGGAGCTTTGTTTGTATGTATATATTTTAAATAAATTTGATAATTAAGTCA[CG]AATGCTCCCAGCACACTTGGATATATTTAAATTACAGGCTTCTGATCAAATGGAGAAAAA	TTTTTCTCCATTTGATCAGAAGCCTGTAATTTAAATATATCCAAGTGTGCTGGGAGCATT[CG]TGACTTAATTATCAAATTTATTTAAAATATATACATACAAACAAAGCTCCAAACTTGCAA	1				chr16:27203451-27204357	N_Shelf								FALSE					Quies;ReprPCWk;EnhA1;TssFlnkU;EnhWk;TxWk;EnhA2;TssFlnk;ReprPC;TssFlnkD	1043;391;101;12;56;41;14;1;3;1	cg02097429
cg02099194	cg02099194	-0.0574613	0.0112242	-5.11941	3.06493e-07	0.00467496	cg02099194_BC21	70712226	CATATCAAAAAACCATACAATCCAAACAATACCATATTTTAATACATCCC						cg	R	B	C	2	II	13	42575553	Human	GRCh38	ATGTCAAAAAACCATACAATCCAAGCAATGCCATGTTTTGATGCATCCCG	AAAGAAAGTTGGGTTTGGACTACATTCGTTTTCAGATTCAAAGGTGATTACTAAACCAAA[CG]GGATGCATCAAAACATGGCATTGCTTGGATTGTATGGTTTTTTGACATGTGCCAATGTCT	AAAGAAAGTTGGGTTTGGACTACATTCGTTTTCAGATTCAAAGGTGATTACTAAACCAAA[CG]GGATGCATCAAAACATGGCATTGCTTGGATTGTATGGTTTTTTGACATGTGCCAATGTCT	1											13:43149668-43149965	Unclassified_Cell_type_specific	TRUE		EH38D4762844			Quies;ReprPCWk;ReprPC;TssFlnkD;EnhBiv;TssBiv;TxWk;EnhWk;EnhA1;TssFlnk;Het;EnhA2;TssA;TssFlnkU	735;63;588;7;48;103;20;64;25;5;2;1;1;1	cg02099194
cg02102872	cg02102872	-0.0419826	0.00900134	-4.66404	3.10055e-06	0.0184673	cg02102872_TC21	13781199	TAAAAAAATTATTCTAACCTACAAATTCTACCTCTCCCCAAAACAAATAC						cg	F	T	C	2	II	4	78417683	Human	GRCh38	CGTATTTGTCCTGGGGAGAGGCAGAATTTGCAGGTTAGAACAATCCCCCT	ACTCTTTACTATAGGGGGATTGTTCTAACCTGCAAATTCTGCCTCTCCCCAGGACAAATA[CG]CCTTGGGGACAATTACAAAGCAACTGCAACCTACAATCTTTTCATGGTTAAAGGAAGAAC	ACTCTTTACTATAGGGGGATTGTTCTAACCTGCAAATTCTGCCTCTCCCCAGGACAAATA[CG]CCTTGGGGACAATTACAAAGCAACTGCAACCTACAATCTTTTCATGGTTAAAGGAAGAAC	1						TSS1500	ENSG00000138759.20	ENST00000510944.3					FALSE		EH38D3592036	EH38E2306039|dELS;EH38E2306039|DNase-only;EH38E2306039|Low-DNase	1;1;85	Quies;EnhWk;TxWk;Het;EnhA1;Tx;ReprPCWk;EnhA2;ReprPC;EnhG1;ZNF/Rpts	1448;60;65;12;9;3;53;4;2;3;4	cg02102872
cg02104009	cg02104009	-0.0503214	0.0113909	-4.41769	9.97631e-06	0.0376461	cg02104009_BC21	5685475	CAAAAATACCATTAATACACAAAACAAATACCACTAAAAACCAATTCCAC						cg	F	B	C	2	II	4	156792665	Human	GRCh38	AGAAATGCCATTAATACACAAAGCAAATACCACTAAAGGCCAATTCCACG	TTATCTTCAGGCAGAAATGCCATTAATACACAAAGCAAATACCACTAAAGGCCAATTCCA[CG]TAGTGTGCATAGTTCAGGAAGTCTACAGACCTATCTAAACAATGAATAACTGTGGTTTCC	GGAAACCACAGTTATTCATTGTTTAGATAGGTCTGTAGACTTCCTGAACTATGCACACTA[CG]TGGAATTGGCCTTTAGTGGTATTTGCTTTGTGTATTAATGGCATTTCTGCCTGAAGATAA	1													FALSE		EH38D3646190	EH38E2338863|dELS;EH38E2338863|DNase-only;EH38E2338863|Low-DNase	2;1;84	Quies;TxWk;Het;EnhWk;ReprPCWk;EnhA1;EnhA2	1435;59;125;31;7;2;4
cg02135151	cg02135151	-0.0297944	0.00617865	-4.82216	1.42015e-06	0.0111494	cg02135151_BC21	43792987	ATAAAAATCCTATCCCCATTCCTTTCTATCCTAAAAACATAAAAAAACTC						cg	F	B	C	2	II	22	31343729	Human	GRCh38	TAGAGATCCTGTCCCCATTCCTTTCTGTCCTGAAAACATAAAGGGGCTCG	AGTGAACCTACATAGAGATCCTGTCCCCATTCCTTTCTGTCCTGAAAACATAAAGGGGCT[CG]TGGGTCCCATTAGGCTCTAGAGCTACCAGGTCAGAGCAGATCAAAGCTTTTGGTGTTAAG	CTTAACACCAAAAGCTTTGATCTGCTCTGACCTGGTAGCTCTAGAGCCTAATGGGACCCA[CG]AGCCCCTTTATGTTTTCAGGACAGAAAGGAATGGGGACAGGATCTCTATGTAGGTTCACT	1				chr22:31345059-31347721	N_Shore	TSS1500;TSS200	ENSG00000100105.18;ENSG00000100105.18	ENST00000494109.1;ENST00000465287.1			22:31739650-31740012	Promoter_Associated_Cell_type_specific	TRUE		EH38D5394975	EH38E3476311|dELS;EH38E3476311|dELS/CTCF-bound;EH38E3476311|Low-DNase	20;1;66	EnhG1;Tx;TssFlnkU;EnhA1;EnhG2;TssFlnkD;TxWk;EnhA2;EnhWk;TssA;TssFlnk;Quies	126;363;541;110;85;86;168;79;57;30;12;6
cg02151293	cg02151293	-0.0267763	0.00608297	-4.40184	1.07336e-05	0.0393148	cg02151293_BC21	99635103	AATAAACTCTAATATAACACATACTTCAAAAATCCCCATAAAATCAAACC						cg	R	B	C	2	II	1	203269737	Human	GRCh38	ATGAACTCTGGTGTAGCACATGCTTCAGGGATCCCCATGAAATCAGGCCG	GAAGGAGAGTGGGGTGGGGAAGGAGGGAGCCAGGCTGTGGTGTCAGCTGTGGCTGAGCTG[CG]GCCTGATTTCATGGGGATCCCTGAAGCATGTGCTACACCAGAGTTCATCTTGTCTTGAGG	GAAGGAGAGTGGGGTGGGGAAGGAGGGAGCCAGGCTGTGGTGTCAGCTGTGGCTGAGCTG[CG]GCCTGATTTCATGGGGATCCCTGAAGCATGTGCTACACCAGAGTTCATCTTGTCTTGAGG	1				chr1:203273391-203273690	N_Shelf	exon_1	CHIT1	ENST00000484834.5					FALSE		EH38D4452588			ReprPCWk;EnhWk;TxWk;Quies;TssFlnkU;EnhA1;EnhA2;ReprPC;TssA;EnhBiv;TssFlnkD	293;89;723;235;36;98;71;114;2;1;1
cg02154074	cg02154074	-0.0261084	0.00556319	-4.69307	2.69133e-06	0.0169349	cg02154074_TC21	56609332	TCAATTTACTTACCACCTATAACACCRTAAATAAAAACRAAACCRAAAAC						cg	R	T	C	2	II	2	74529107	Human	GRCh38	CGCTCTCGGCCTCGCTCTCACTCACGGTGCTACAGGTGGTAAGCAAATTG	TGGGGAACGCGAGTGGGGACAGGGGGGCCTTCAGCTGGGCCCCAGGGAACCGCCCCGTGG[CG]CTCTCGGCCTCGCTCTCACTCACGGTGCTACAGGTGGTAAGCAAATTGACTATGTTGTGG	CCACAACATAGTCAATTTGCTTACCACCTGTAGCACCGTGAGTGAGAGCGAGGCCGAGAG[CG]CCACGGGGCGGTTCCCTGGGGCCCAGCTGAAGGCCCCCCTGTCCCCACTCGCGTTCCCCA	1	exon_3;TSS1500;TSS1500;TSS1500;TSS1500;TSS1500;TSS1500;TSS1500;TSS1500	AUP1;HTRA2;HTRA2;HTRA2;HTRA2;HTRA2;HTRA2;HTRA2;HTRA2	NR_126511.2;NM_013247.5;NM_145074.2;NM_001321728.1;NM_001321727.1;NR_135771.1;NR_135770.1;NR_135772.1;NR_135769.1	chr2:74529096-74530803	Island	exon_3;exon_3;TSS1500;TSS1500;TSS200;TSS1500;TSS1500;TSS1500;TSS1500;TSS1500;TSS1500;TSS1500;TSS1500;TSS1500;TSS1500;TSS1500;TSS1500;TSS1500;TSS1500;TSS1500	AUP1;AUP1;ENSG00000115307.17;ENSG00000115307.17;ENSG00000115307.17;ENSG00000115317.13;ENSG00000115317.13;ENSG00000115317.13;ENSG00000115317.13;ENSG00000115317.13;ENSG00000115317.13;ENSG00000115317.13;ENSG00000115317.13;ENSG00000115317.13;ENSG00000115317.13;ENSG00000115317.13;ENSG00000115317.13;ENSG00000115317.13;ENSG00000115317.13;ENSG00000115317.13	ENST00000463900.5;ENST00000466894.5;ENST00000486234.1;ENST00000462297.1;ENST00000464887.1;ENST00000696725.1;ENST00000462909.6;ENST00000467961.6;ENST00000696726.1;ENST00000484881.6;ENST00000258080.8;ENST00000696727.1;ENST00000352222.7;ENST00000696728.1;ENST00000437202.2;ENST00000484352.5;ENST00000696729.1;ENST00000696730.1;ENST00000465521.2;ENST00000482205.1					FALSE		EH38D5204962	EH38E3353162|DNase-H3K4me3;EH38E3353162|Low-DNase;EH38E3353162|pELS;EH38E3353162|pELS/CTCF-bound	1;63;13;10	Quies;ReprPCWk;TssFlnkU;TssA;TxWk;TssFlnkD;TssFlnk;Het;ReprPC;Tx;EnhG2;EnhA1	725;34;463;309;63;13;46;4;3;1;1;1	cg02154074	cg02154074
cg02172440	cg02172440	-0.0167371	0.00361623	-4.62833	3.68623e-06	0.0205717	cg02172440_BC21	74740467	TAAATAACTTCRTACCTCCRAAAATTATAACCRTTCTTAAACTCCTTAAC						cg	R	B	C	2	II	16	29807370	Human	GRCh38	GGATGGCTTCGTGCCTCCGGAGATTGTAGCCGTTCTTGAACTCCTTGGCG	GGTCGCGTCTGCCTTGGAGAAGAAGACAAAGAGCAAGGGGCCCTACATCTGCGCTCTGTG[CG]CCAAGGAGTTCAAGAACGGCTACAATCTCCGGAGGCACGAAGCCATCCACACGGGAGCCA	GGTCGCGTCTGCCTTGGAGAAGAAGACAAAGAGCAAGGGGCCCTACATCTGCGCTCTGTG[CG]CCAAGGAGTTCAAGAACGGCTACAATCTCCGGAGGCACGAAGCCATCCACACGGGAGCCA	1	exon_2;exon_3;exon_2	MAZ;MAZ;MAZ	NM_001042539.3;NM_001276275.2;NM_002383.4	chr16:29804926-29807918	Island	exon_3;exon_2;exon_2;exon_1;TSS200;TSS1500;TSS1500;TSS1500;TSS1500;TSS1500;TSS1500;TSS1500;TSS1500	MAZ;MAZ;MAZ;ENSG00000259952;ENSG00000103495.15;ENSG00000103495.15;ENSG00000103495.15;ENSG00000103495.15;ENSG00000103495.15;ENSG00000103495.15;ENSG00000103495.15;ENSG00000103495.15;ENSG00000280607.1	ENST00000545521.5;ENST00000322945.11;ENST00000219782.10;ENST00000566537.1;ENST00000567444.5;ENST00000568411.5;ENST00000563012.1;ENST00000562557.5;ENST00000568544.5;ENST00000569978.1;ENST00000568282.1;ENST00000565777.1;ENST00000562594.2		16:29806932-29808295			FALSE					TxWk;Tx;TssA;TssFlnkU;EnhA1;TssFlnk;EnhG2;Quies;TssFlnkD;EnhG1;EnhA2	774;48;325;474;3;15;13;7;2;1;1
cg02176569	cg02176569	-0.0522342	0.0119628	-4.36638	1.26322e-05	0.0432878	cg02176569_BC21	9778145	CTAACTCATTCTTTAAAATTAACATTAACCCATTATCACCTCTCAATACC						cg	R	B	C	2	II	2	230227406	Human	GRCh38	TAACTCATTCTTTGAGGTTAGCATTAGCCCATTGTCACCTCTCAGTGCCG	GAAGATGAGCCAGCGGAGCTCAAAGTCCAGCCAGCCCATGGTCACCAAGCAGGAAGAAGA[CG]GCACTGAGAGGTGACAATGGGCTAATGCTAACCTCAAAGAATGAGTTAGGAAGTGTTGCC	GAAGATGAGCCAGCGGAGCTCAAAGTCCAGCCAGCCCATGGTCACCAAGCAGGAAGAAGA[CG]GCACTGAGAGGTGACAATGGGCTAATGCTAACCTCAAAGAATGAGTTAGGAAGTGTTGCC	1													FALSE		EH38D5286767	EH38E3405436|DNase-H3K4me3;EH38E3405436|Low-DNase;EH38E3405436|pELS	1;84;2	Quies;TssFlnkU;TssA;TssFlnk;EnhA2;TssFlnkD;TxWk;EnhWk;ReprPCWk;Het;EnhA1;EnhG2;Tx	1446;66;11;21;26;8;30;16;12;14;9;1;3
cg02197022	cg02197022	-0.0267393	0.00585614	-4.56602	4.97073e-06	0.0246189	cg02197022_BC21	5797845	AAAACTCTCCACACAACAAACACTAAAAAACTATCACAAATCTTAACTCC						cg	F	B	C	2	II	12	48213056	Human	GRCh38	GGACTCTCCACACAGCAGGCACTGGGGAGCTGTCACAAATCTTGACTCCG	CAGATCACAACAGGACTCTCCACACAGCAGGCACTGGGGAGCTGTCACAAATCTTGACTC[CG]TTAACCCCCCTCTGCTCTGTTTCTCCTTCTCTAAGCTCGCTGTGGTCCCAACTTCCTCCG	CGGAGGAAGTTGGGACCACAGCGAGCTTAGAGAAGGAGAAACAGAGCAGAGGGGGGTTAA[CG]GAGTCAAGATTTGTGACAGCTCCCCAGTGCCTGCTGTGTGGAGAGTCCTGTTGTGATCTG	1													FALSE		EH38D4689685	EH38E3014835|Low-DNase;EH38E3014835|pELS	84;3	TssFlnkU;TssFlnkD;Quies;TssA;EnhWk;EnhA2;ReprPC;ReprPCWk;TssFlnk;EnhA1;EnhBiv;TssBiv;Het	173;20;280;688;33;168;106;106;51;6;20;10;2
cg02207086	cg02207086	-0.0447249	0.0101474	-4.4075	1.04571e-05	0.0385425	cg02207086_TC21	5795256	TACATCTTAAATCATCTTCCRTTTTAAAAAATTAATCCCACCTACTACAC						cg	F	T	C	2	II	4	185394946	Human	GRCh38	CGTGTAGCAGGTGGGATCAATTTTCTAAAACGGAAGATGATCTAAGATGC	CCTATAAAATATGCATCTTAGATCATCTTCCGTTTTAGAAAATTGATCCCACCTGCTACA[CG]CCTGGTGAAACTCCAGTTACTTGCCAGTAAGATATTGTCCCCCAAATGTACTTATCCTGT	CCTATAAAATATGCATCTTAGATCATCTTCCGTTTTAGAAAATTGATCCCACCTGCTACA[CG]CCTGGTGAAACTCCAGTTACTTGCCAGTAAGATATTGTCCCCCAAATGTACTTATCCTGT	1	5UTR;exon_1;5UTR;exon_1;5UTR;exon_1	LRP2BP;LRP2BP;LRP2BP;LRP2BP;LRP2BP;LRP2BP	NM_001377440.1;NM_001377440.1;NM_001377441.3;NM_001377441.3;NM_001385603.1;NM_001385603.1	chr4:185395989-185397101	N_Shore	exon_1;5UTR;TSS1500;TSS1500	LRP2BP;LRP2BP;ENSG00000186352.9;ENSG00000186352.9	ENST00000505916.6;ENST00000505916.6;ENST00000507479.5;ENST00000507753.1					FALSE					TssA;EnhA1;Quies;TssFlnkU;TssFlnk;EnhWk;TssFlnkD;TxWk;EnhA2;ReprPCWk;TssBiv;ReprPC	856;17;133;336;119;63;72;21;29;13;1;3
cg02217814	cg02217814	-0.0621046	0.0111897	-5.55017	2.85391e-08	0.00109238	cg02217814_TC21	39791434	TCTTCAAATTATACCCAAAATTTCAAAACTCATAATAATCCATAATACTC						cg	F	T	C	2	II	19	17419510	Human	GRCh38	CGAGTACTATGGACCATCATGAGCTTTGAAATCTTGGGTATAACTTGAAG	CTGTGAACAAATCTTCAAGTTATACCCAAGATTTCAAAGCTCATGATGGTCCATAGTACT[CG]CTCTTTAAATCAATAGCTGCGTATCCCACAGATGATTTCCTTTGGGATGATTTCCCAGAA	CTGTGAACAAATCTTCAAGTTATACCCAAGATTTCAAAGCTCATGATGGTCCATAGTACT[CG]CTCTTTAAATCAATAGCTGCGTATCCCACAGATGATTTCCTTTGGGATGATTTCCCAGAA	1	TSS1500	MVB12A	NM_138401.4	chr19:17419841-17420726	N_Shore	exon_1;TSS1500;TSS1500;TSS1500;TSS1500;TSS1500;TSS1500;TSS1500;TSS1500;TSS1500	ENSG00000269053;ENSG00000141971.13;ENSG00000141971.13;ENSG00000141971.13;ENSG00000141971.13;ENSG00000141971.13;ENSG00000141971.13;ENSG00000141971.13;ENSG00000141971.13;ENSG00000254503.1	ENST00000597028.1;ENST00000528659.5;ENST00000317040.12;ENST00000528997.5;ENST00000528732.1;ENST00000529939.5;ENST00000528515.5;ENST00000543795.5;ENST00000526234.1;ENST00000526892.1			19:17530286-17531771	Promoter_Associated	TRUE					TxWk;TssA;TssFlnkU;TssFlnk;EnhA2;EnhWk;TssFlnkD;Quies;EnhA1	780;230;544;26;53;5;12;10;3	cg02217814	cg02217814
cg02251917	cg02251917	-0.0339988	0.00734018	-4.63187	3.62376e-06	0.0204205	cg02251917_TC21	61763165	AAAAAACTAATTCTAACTCCATCTACCACCACAAAAATAATCTCTCTATC						cg	F	T	C	2	II	2	181268607	Human	GRCh38	CGATAGAGAGATTATTTCTGTGGTGGCAGATGGAGCCAGAACCAGCCCTC	GGGGATATGTAGGAGGGCTGGTTCTGGCTCCATCTGCCACCACAGAAATAATCTCTCTAT[CG]TATCTCACTGTCCTTCCCACCACACACACAGTCTATTTTTACTCTCATTCTTACTGTAAT	GGGGATATGTAGGAGGGCTGGTTCTGGCTCCATCTGCCACCACAGAAATAATCTCTCTAT[CG]TATCTCACTGTCCTTCCCACCACACACACAGTCTATTTTTACTCTCATTCTTACTGTAAT	1													FALSE		EH38D3216998	EH38E2056904|dELS;EH38E2056904|Low-DNase	1;86	Quies;TxWk;ReprPCWk;EnhWk;TssFlnk;Het;EnhA2	1639;7;5;5;1;3;3
cg02256034	cg02256034	-0.0500431	0.00835208	-5.99169	2.07676e-09	0.000232835	cg02256034_TC21	58784247	ACAATCCACTAAATTAAAACACCTCATTCATAAAATTCTATTATTTATTC						cg	R	T	C	2	II	8	70219759	Human	GRCh38	CGAATAAATAACAGAACCTCATGAATGAGGTGCTCTAACCTAGTGGACTG	AGACAGCTGCAGTCTTAGAGCAGACACATAAATTTATGCCCTGCATTTTAGTGGGAGAGC[CG]AATAAATAACAGAACCTCATGAATGAGGTGCTCTAACCTAGTGGACTGTCTGATATTTCT	AGAAATATCAGACAGTCCACTAGGTTAGAGCACCTCATTCATGAGGTTCTGTTATTTATT[CG]GCTCTCCCACTAAAATGCAGGGCATAAATTTATGTGTCTGCTCTAAGACTGCAGCTGTCT	1													FALSE		EH38D5959025	EH38E3839201|dELS;EH38E3839201|DNase-only;EH38E3839201|Low-DNase	3;3;81	Quies;TxWk;EnhA1;EnhWk;EnhA2;TssFlnkU;Het;TssFlnkD;ReprPCWk	1047;260;75;240;14;12;5;4;6
cg02258335	cg02258335	0.0652805	0.0124009	5.26416	1.4083e-07	0.00287602	cg02258335_BC21	71690489	TTTCTACAATATACATAACAATTTATATACCTACAAAACRCTCTAAAAAC						cg	F	B	C	2	II	X	155119602	Human	GRCh38	TTCTGCAATATACATAACAGTTTATATACCTACAGGGCGCTCTGGAAACG	ATTAATGTATATTTCTGCAATATACATAACAGTTTATATACCTACAGGGCGCTCTGGAAA[CG]TAAGTTGCAGAAGGCAGACTTCTGGCCCATTAGGAGGTTATGGTGGTTTACAGCAAGGGA	TCCCTTGCTGTAAACCACCATAACCTCCTAATGGGCCAGAAGTCTGCCTTCTGCAACTTA[CG]TTTCCAGAGCGCCCTGTAGGTATATAAACTGTTATGTATATTGCAGAAATATACATTAAT	1													FALSE					Quies;TxWk;Tx;Het;EnhA2;ZNF/Rpts	1408;208;36;6;1;4
cg02259081	cg02259081	-0.0573241	0.0122734	-4.67059	3.00337e-06	0.0180814	cg02259081_TC21	3672556	AAAAAACTATATATCTATCCATAAACRATAAAACCTTCTATCCCCACAAC						cg	F	T	C	2	II	12	52874649	Human	GRCh38	CGTTGTGGGGACAGAAGGCCCCACCGCCCATGGACAGACACACAGTCTCC	TCTGTTCTTCTGGGAGACTGTGTGTCTGTCCATGGGCGGTGGGGCCTTCTGTCCCCACAA[CG]GGAGGTTGTGTGCCTGTCTTTCTGGGGGTGTCTCTGTGTCTTAAGATCTTTATGAGTGTG	TCTGTTCTTCTGGGAGACTGTGTGTCTGTCCATGGGCGGTGGGGCCTTCTGTCCCCACAA[CG]GGAGGTTGTGTGCCTGTCTTTCTGGGGGTGTCTCTGTGTCTTAAGATCTTTATGAGTGTG	1				chr12:52874075-52874506	S_Shore					12:52874439-52875201	12:53267215-53268678	Promoter_Associated_Cell_type_specific	TRUE					Quies;ReprPCWk;TssFlnkU;EnhBiv;Het;TssFlnkD;EnhA1;EnhWk;TssBiv;TxWk;EnhA2;TssFlnk;ReprPC;TssA;ZNF/Rpts	642;128;420;77;68;21;79;22;143;5;23;7;12;15;1	cg02259081
cg02266849	cg02266849	-0.0590448	0.0128695	-4.58795	4.47621e-06	0.0232483	cg02266849_TC21	89617366	TTTATAAAATACTACCATCTTAACAATATTATACTTTCCAATCCATAAAC						cg	F	T	C	2	II	19	17510264	Human	GRCh38	CGTTCATGGATTGGAAAGTATAATATTGTTAAGATGGCAGTACTCCACAA	CCGTAGACCAATTTGTGGAGTACTGCCATCTTAACAATATTATACTTTCCAATCCATGAA[CG]TGGAATGTCTTACCATTTATTTAGATCATCTTTAATTTTTTTTTTCACCAAAGTTTTAGT	CCGTAGACCAATTTGTGGAGTACTGCCATCTTAACAATATTATACTTTCCAATCCATGAA[CG]TGGAATGTCTTACCATTTATTTAGATCATCTTTAATTTTTTTTTTCACCAAAGTTTTAGT	1	TSS1500	PGLS	NM_012088.3	chr19:17511508-17512507	N_Shore	exon_1;TSS1500;TSS1500;TSS1500;TSS1500	PGLS-DT;ENSG00000130313.7;ENSG00000130313.7;ENSG00000130313.7;ENSG00000130313.7	ENST00000615939.1;ENST00000594761.5;ENST00000596799.1;ENST00000252603.7;ENST00000600923.5					FALSE					Quies;EnhA1;TssFlnk;ReprPCWk;TxWk;EnhWk;TssFlnkD;EnhG1;TssA;Tx;EnhA2;TssFlnkU;ZNF/Rpts;EnhG2;Het	460;14;225;124;406;143;154;6;50;19;9;43;8;1;1	cg02266849
cg02268851	cg02268851	-0.0344099	0.00618766	-5.56106	2.68147e-08	0.00105422	cg02268851_TC21	48640331	ACCACAAAAAAAACTACCTCAATCAAAATATTTCTCCAACATTTAATAAC						cg	F	T	C	2	II	11	47523655	Human	GRCh38	CGTTATTAAATGCTGGAGAAACACCTTGATTGAGGCAGCTTCTTCTGTGG	CATACCACACAGCCACAGAAGAAGCTGCCTCAATCAAGGTGTTTCTCCAGCATTTAATAA[CG]TCCTTTCCTCTCCTCATTGACTACAGTTACAAATAGTATGGGCAGAGAACTGTCTCATCC	CATACCACACAGCCACAGAAGAAGCTGCCTCAATCAAGGTGTTTCTCCAGCATTTAATAA[CG]TCCTTTCCTCTCCTCATTGACTACAGTTACAAATAGTATGGGCAGAGAACTGTCTCATCC	1	5UTR;exon_1	CELF1;CELF1	NM_001172639.2;NM_001172639.2			exon_1;5UTR;TSS200;TSS200	CELF1;CELF1;ENSG00000149187.19;ENSG00000149187.19	ENST00000532048.5;ENST00000532048.5;ENST00000528434.5;ENST00000526277.1			11:47545062-47546460	Promoter_Associated	TRUE		EH38D2450384	EH38E1538301|DNase-only;EH38E1538301|Low-DNase;EH38E1538301|pELS	3;41;43	TxWk;EnhA1;Quies;TssFlnkU;EnhA2;TssA;EnhWk;EnhG1;TssFlnk;TssFlnkD;Tx;ReprPCWk;EnhG2	423;497;364;186;76;15;78;5;1;5;11;1;1
cg02278864	cg02278864	-0.0409943	0.00834286	-4.9137	8.93735e-07	0.00854422	cg02278864_TC21	17725560	TTCAATATACCAATTCAATAAATTCTACTACTCTATAACTACTTCCCAAC						cg	R	T	C	2	II	1	45608776	Human	GRCh38	CGTTGGGAAGCAGCTACAGAGCAGTAGAATCCACTGAATTGGTACACTGA	GATGTTCACTTGCATGCCTCTGGATTTTAAAATTATTGTTCACATGACTCCTTTTCTGTG[CG]TTGGGAAGCAGCTACAGAGCAGTAGAATCCACTGAATTGGTACACTGAAGCAGGCATGCC	GGCATGCCTGCTTCAGTGTACCAATTCAGTGGATTCTACTGCTCTGTAGCTGCTTCCCAA[CG]CACAGAAAAGGAGTCATGTGAACAATAATTTTAAAATCCAGAGGCATGCAAGTGAACATC	1						TSS1500	ENSG00000132780.17	ENST00000530073.5					FALSE					Quies;ReprPCWk;Tx;EnhG1;TxWk;EnhA1;TssFlnkU;EnhWk;EnhG2;EnhA2;TssFlnkD	843;14;448;86;190;18;11;14;24;14;1
cg02283691	cg02283691	-0.0354798	0.00612669	-5.79102	6.99613e-09	0.000513942	cg02283691_TC21	1796993	TCATCAAACCTAAATTAACATCCTATTTTTTACCATAACAAATCATATAC						cg	F	T	C	2	II	19	32691620	Human	GRCh38	CGCATATGACTTGCCATGGTAAAAAACAGGATGCCAACCCAGGCCTGATG	TGAGGTGGATGTCATCAGGCCTGGGTTGGCATCCTGTTTTTTACCATGGCAAGTCATATG[CG]CCCTTAAGCATTCCTGCTTTTGGTCCAAGCTTCCTGCGTGGGAATACTGCGGTCCTCCTT	TGAGGTGGATGTCATCAGGCCTGGGTTGGCATCCTGTTTTTTACCATGGCAAGTCATATG[CG]CCCTTAAGCATTCCTGCTTTTGGTCCAAGCTTCCTGCGTGGGAATACTGCGGTCCTCCTT	1	TSS1500	NUDT19	NM_001105570.2	chr19:32691703-32692656	N_Shore	exon_1;exon_1;exon_1;TSS1500	NUDT19-DT;NUDT19-DT;NUDT19-DT;ENSG00000213965.4	ENST00000592431.3;ENST00000702394.1;ENST00000701994.1;ENST00000397061.4			19:33182048-33183790	Promoter_Associated	TRUE		EH38D5126433	EH38E3300866|Low-DNase;EH38E3300866|PLS;EH38E3300866|PLS/CTCF-bound	5;71;11	Quies;ReprPCWk;TssFlnkU;TssFlnk;TssA;EnhWk;ReprPC;EnhA2;Het;TssBiv;TssFlnkD;EnhA1;TxWk;EnhBiv	683;98;660;27;100;7;5;6;41;16;14;4;1;1	cg02283691
cg02287279	cg02287279	0.0374543	0.00830439	4.51018	6.47722e-06	0.0290452	cg02287279_BC21	6626947	TTAACCTCTATTATAAAAATTATAAATCACTTTCCCCTTTCTCTTTATAC						cg	F	B	C	2	II	5	90518303	Human	GRCh38	TGGCCTCTGTTGTAGGAATTATAAATCACTTTCCCCTTTCTCTTTGTACG	TAATCTATTTCTTGGCCTCTGTTGTAGGAATTATAAATCACTTTCCCCTTTCTCTTTGTA[CG]TATGCTTTCATAGCACATGTGCTAAATGTATTTTTTAAAAGTTTTGAAGGGGTGTGTTAC	GTAACACACCCCTTCAAAACTTTTAAAAAATACATTTAGCACATGTGCTATGAAAGCATA[CG]TACAAAGAGAAAGGGGAAAGTGATTTATAATTCCTACAACAGAGGCCAAGAAATAGATTA	1	3UTR;exon_3;3UTR;exon_3	LYSMD3;LYSMD3;LYSMD3;LYSMD3	NM_001286812.1;NM_001286812.1;NM_198273.2;NM_198273.2			exon_4;exon_3;exon_3;3UTR;3UTR;3UTR	LYSMD3;LYSMD3;LYSMD3;LYSMD3;LYSMD3;LYSMD3	ENST00000500869.6;ENST00000315948.11;ENST00000509384.5;ENST00000315948.11;ENST00000500869.6;ENST00000509384.5					FALSE					Quies;TxWk;Tx;ReprPCWk;EnhA2;EnhWk;EnhG2;EnhA1;Het	896;694;44;5;13;6;1;3;1	cg02287279
cg02289689	cg02289689	-0.0132931	0.0030828	-4.31201	1.61776e-05	0.0499899	cg02289689_TC21	59733862	ACCCAAATAATACTTCCRACACAAATTCAATTTCTCCTCATTAAACACTC						cg	R	T	C	2	II	19	35745943	Human	GRCh38	CGAGTGTCCAATGAGGAGAAATTGAACCTGTGCCGGAAGTACTACCTGGG	TGGGTCTTGCCCCGCAGACCCTTGGGACGACCCGGCCCCAGCGCAGCTATGAACCTGGAG[CG]AGTGTCCAATGAGGAGAAATTGAACCTGTGCCGGAAGTACTACCTGGGTAAGGCAGATCG	CGATCTGCCTTACCCAGGTAGTACTTCCGGCACAGGTTCAATTTCTCCTCATTGGACACT[CG]CTCCAGGTTCATAGCTGCGCTGGGGCCGGGTCGTCCCAAGGGTCTGCGGGGCAAGACCCA	1	exon_2;exon_2;TSS1500;TSS1500;TSS1500;TSS1500;TSS1500;TSS1500;TSS1500;TSS1500;TSS1500	PSENEN;PSENEN;U2AF1L4;U2AF1L4;U2AF1L4;U2AF1L4;U2AF1L4;U2AF1L4;U2AF1L4;U2AF1L4;U2AF1L4	NM_001281532.3;NM_172341.4;NM_001040425.3;NM_144987.4;NM_001369824.2;NR_163170.1;NR_110173.2;NR_163171.1;NR_163173.1;NR_163169.1;NR_163172.2	chr19:35744906-35745647;chr19:35748771-35748983	S_Shore;N_Shelf	exon_2;exon_2;exon_2;exon_2;TSS1500;TSS1500;TSS1500;TSS1500;TSS1500;TSS1500;TSS1500;TSS1500;TSS1500;TSS1500;TSS1500;TSS1500;TSS1500;TSS1500;TSS1500;TSS1500;TSS1500;TSS1500;TSS1500;TSS1500;TSS1500;TSS1500	PSENEN;PSENEN;PSENEN;ENSG00000188223;ENSG00000267120.3;ENSG00000161265.15;ENSG00000161265.15;ENSG00000161265.15;ENSG00000161265.15;ENSG00000161265.15;ENSG00000161265.15;ENSG00000161265.15;ENSG00000161265.15;ENSG00000161265.15;ENSG00000161265.15;ENSG00000161265.15;ENSG00000161265.15;ENSG00000161265.15;ENSG00000161265.15;ENSG00000161265.15;ENSG00000161265.15;ENSG00000161265.15;ENSG00000161265.15;EN…	ENST00000591949.1;ENST00000222266.2;ENST00000587708.7;ENST00000591613.2;ENST00000589807.1;ENST00000591057.5;ENST00000591084.5;ENST00000378975.8;ENST00000590135.5;ENST00000585554.5;ENST00000412391.6;ENST00000591855.5;ENST00000594792.5;ENST00000600296.5;ENST00000587987.5;ENST00000589429.5;ENST00000588980.5;ENST00000592913.5;ENST00000292879.9;ENST00000588892.1;ENST00000586476.5;ENST00000601236.1;ENS…					FALSE		EH38D5129899	EH38E3302949|DNase-H3K4me3;EH38E3302949|Low-DNase;EH38E3302949|pELS	2;56;29	ReprPCWk;Tx;TssFlnkU;TssA;TxWk;Quies;TssFlnk;EnhWk;EnhG1;EnhA2;ReprPC;TssFlnkD;EnhA1;EnhBiv;EnhG2	163;141;529;268;158;290;24;5;12;46;7;9;9;1;1	cg02289689
cg02305757	cg02305757	-0.0289027	0.00658375	-4.39	1.13349e-05	0.0405406	cg02305757_BC21	55688279	CCTAATAAATACTCCATCTCCAATAAAAAACTCCACAAAAAAAAACATCC						cg	R	B	C	2	II	6	33414780	Human	GRCh38	CTGGTGAGTGCTCCATCTCCAGTAGGGGGCTCCACAGGGGGAGGCATCCG	CCCAGTTTCATTTCAGGGAGAGAGATTAAGAAGAGGAAATGTTTGTTTGGTCTCCATGCT[CG]GATGCCTCCCCCTGTGGAGCCCCCTACTGGAGATGGAGCACTCACCAGGTCACTGGTCCA	CCCAGTTTCATTTCAGGGAGAGAGATTAAGAAGAGGAAATGTTTGTTTGGTCTCCATGCT[CG]GATGCCTCCCCCTGTGGAGCCCCCTACTGGAGATGGAGCACTCACCAGGTCACTGGTCCA	1	exon_11;exon_11;exon_11	PHF1;PHF1;PHF1	NM_002636.5_2;NM_024165.3_2;NR_027692.2_2	chr6:33410152-33410868;chr6:33411056-33411390;chr6:33417901-33418485	S_Shelf;S_Shelf;N_Shelf	exon_11;exon_11;exon_11;exon_11;exon_3;TSS1500;TSS1500	PHF1;PHF1;PHF1;PHF1;PHF1;ENSG00000112511.18;ENSG00000112511.18	ENST00000487667.5;ENST00000374512.7;ENST00000374516.8;ENST00000495509.6;ENST00000486845.1;ENST00000427826.1;ENST00000479029.1			6:33381563-33383449	Gene_Associated	TRUE		EH38D5745417	EH38E3702059|CTCF-only/CTCF-bound;EH38E3702059|dELS;EH38E3702059|dELS/CTCF-bound;EH38E3702059|Low-DNase	15;1;3;68	Tx;EnhG1;TxWk;Quies;EnhG2;EnhA2;EnhWk;EnhA1	996;174;346;66;65;4;7;5	cg02305757
cg02306082	cg02306082	-0.036148	0.00818462	-4.41657	1.0028e-05	0.0377396	cg02306082_BC21	99677233	CTTATCATCTAAATCACCTTAACAACTTCCCAACATTTCTAAAAATCAAC						cg	R	B	C	2	II	4	124642209	Human	GRCh38	TTGTCATCTGAATCACCTTGGCAGCTTCCCAGCATTTCTGAAAATCAGCG	GAGTCATTCTCTTAAAGGAGGAAGTTGAACTAGATGACCCAATGCAGCACTTGTAAGCAT[CG]CTGATTTTCAGAAATGCTGGGAAGCTGCCAAGGTGATTCAGATGACAAGCCAGGTTTGAA	GAGTCATTCTCTTAAAGGAGGAAGTTGAACTAGATGACCCAATGCAGCACTTGTAAGCAT[CG]CTGATTTTCAGAAATGCTGGGAAGCTGCCAAGGTGATTCAGATGACAAGCCAGGTTTGAA	1													FALSE		EH38D5593745	EH38E3603443|dELS;EH38E3603443|DNase-only;EH38E3603443|Low-DNase	8;14;65	Quies;Het;EnhA1;EnhWk;TxWk;ZNF/Rpts;TssFlnkU;EnhA2;ReprPCWk	1422;61;39;71;37;8;14;10;1
cg02315509	cg02315509	-0.0435121	0.00985303	-4.41612	1.0049e-05	0.0377659	cg02315509_TC21	86745258	TACCTTCRTAAAATAATAACACCCCCACTTACTCCTAATATTACCATATC						cg	F	T	C	2	II	3	111596540	Human	GRCh38	CGATATGGTAATATCAGGAGTAAGTGGGGGTGTTATTATTTTACGAAGGC	AGTGAGCCAGTTGCCTTCGTAAAATAATAACACCCCCACTTACTCCTGATATTACCATAT[CG]TCATCTTTGGTGGGTTAACTAAAGAGAAAGGAAATGAATCATAAGAATGGTTAATGTCAC	AGTGAGCCAGTTGCCTTCGTAAAATAATAACACCCCCACTTACTCCTGATATTACCATAT[CG]TCATCTTTGGTGGGTTAACTAAAGAGAAAGGAAATGAATCATAAGAATGGTTAATGTCAC	1	TSS1500	ZBED2	NM_024508.5			TSS1500	ENSG00000177494.6	ENST00000317012.5					FALSE		EH38D5480166			Quies;TxWk;EnhWk;EnhA2;ReprPCWk;Tx;Het;EnhA1;EnhG2	1436;183;9;6;11;7;9;1;1
cg02324227	cg02324227	-0.0540504	0.0122611	-4.4083	1.04185e-05	0.0384705	cg02324227_BC21	40603425	TAAAAAAATCACAACAAATTAACAAAAATAAAATTCRAACCCATACCTCC						cg	F	B	C	2	II	5	181164594	Human	GRCh38	GGAGAAATCACAACAAGTTGGCAGAGGTGGAATTCGAACCCATGCCTCCG	GGGGGACAAAATGGAGAAATCACAACAAGTTGGCAGAGGTGGAATTCGAACCCATGCCTC[CG]AAGACACCGGCGCCTTAATCCGGAGCCTTAGACCGCTCGGCCTTGCTATCTTTCTCCTGG	CCAGGAGAAAGATAGCAAGGCCGAGCGGTCTAAGGCTCCGGATTAAGGCGCCGGTGTCTT[CG]GAGGCATGGGTTCGAATTCCACCTCTGCCAACTTGTTGTGATTTCTCCATTTTGTCCCCC	1				chr5:181160685-181161234	S_Shelf								FALSE		EH38D3802084	EH38E2437982|DNase-H3K4me3;EH38E2437982|DNase-only;EH38E2437982|Low-DNase	1;1;85	ReprPC;TssBiv;ReprPCWk;EnhWk;TssFlnk;Quies;TxWk;TssA;EnhBiv;ZNF/Rpts;TssFlnkD;EnhA2;TssFlnkU;Het	374;92;124;12;64;50;21;19;62;5;4;4;1;1	cg02324227
cg02343446	cg02343446	-0.0481566	0.0107821	-4.46636	7.95599e-06	0.0328315	cg02343446_BC21	4627525	ACCTACRAAACTTCCCATCTAAACTTTCAATTACTACATTCTCTAAAACC						cg	F	B	C	2	II	12	11546429	Human	GRCh38	CCTACGGAGCTTCCCATCTGGGCTTTCAGTTGCTACATTCTCTAAAGCCG	CTTATCCAGCTGCCTACGGAGCTTCCCATCTGGGCTTTCAGTTGCTACATTCTCTAAAGC[CG]TATCTGACCCACACCTTACTAACACTATGTGCTTCTACAGCATTCACCCAGTGTTACAGC	GCTGTAACACTGGGTGAATGCTGTAGAAGCACATAGTGTTAGTAAGGTGTGGGTCAGATA[CG]GCTTTAGAGAATGTAGCAACTGAAAGCCCAGATGGGAAGCTCCGTAGGCAGCTGGATAAG	1						TSS200	ENSG00000251747.1	ENST00000515938.1			12:11698229-11699743	Unclassified	TRUE					Quies;TssFlnkU;EnhA1;EnhA2;EnhWk;ReprPCWk;TxWk;Het;TssFlnkD;TssFlnk;TssA;ReprPC	1305;65;75;54;36;91;29;2;1;2;1;2
cg02350755	cg02350755	-0.026928	0.00623079	-4.32177	1.54784e-05	0.0487128	cg02350755_BC21	86810535	AACACATTTTACATCATAACTCCATACACACATCCATCTATAACTAAAAC						cg	F	B	C	2	II	4	55032155	Human	GRCh38	ACACATTTTACATCATGACTCCATACACACATCCATCTATAACTGAAACG	TCACAACGTGAAACACATTTTACATCATGACTCCATACACACATCCATCTATAACTGAAA[CG]AAATTCTACTTTGTAATCCTTGCACTTCTTCCATGTAGTACACTACATTTTTCTATTACA	TGTAATAGAAAAATGTAGTGTACTACATGGAAGAAGTGCAAGGATTACAAAGTAGAATTT[CG]TTTCAGTTATAGATGGATGTGTGTATGGAGTCATGATGTAAAATGTGTTTCACGTTGTGA	1						TSS200	ENSG00000252815.1	ENST00000517006.1					FALSE					Quies;ReprPCWk;TxWk;EnhA1;EnhWk;EnhA2;Het;ReprPC	1397;82;31;83;36;30;2;2
cg02352722	cg02352722	-0.0345402	0.00782087	-4.41641	1.00353e-05	0.0377422	cg02352722_BC21	62604274	CAACAACCTCACCTAAACCAAAAAACCTCCAACTCTAAATTCCTAATCAC						cg	F	B	C	2	II	16	65089249	Human	GRCh38	AGCAGCCTCACCTAAACCAAGAAACCTCCAACTCTGGGTTCCTAGTCACG	TGCAACTGAAACAGCAGCCTCACCTAAACCAAGAAACCTCCAACTCTGGGTTCCTAGTCA[CG]AACTACATTACCCTAGACAAGGATTTAAACTTCTCTGAGCATTATTTTTCTCATAGCAAA	TTTGCTATGAGAAAAATAATGCTCAGAGAAGTTTAAATCCTTGTCTAGGGTAATGTAGTT[CG]TGACTAGGAACCCAGAGTTGGAGGTTTCTTGGTTTAGGTGAGGCTGCTGTTTCAGTTGCA	1													FALSE					Quies;TxWk;EnhWk;EnhA2;ReprPCWk;Het;Tx;EnhA1;EnhG1;ReprPC	1258;337;16;3;11;20;11;3;3;1	cg02352722
cg02353844	cg02353844	-0.010777	0.00218672	-4.92837	8.29166e-07	0.00815759	cg02353844_TC21	28727195	AAAACRAAACCCRATAACCCCTAAATTCTACTATATAAATCACTACCCTC						cg	R	T	C	2	II	1	101236628	Human	GRCh38	CGAGGGCAGTGATTTATACAGTAGAATCCAGGGGTTACCGGGCTCCGCCC	TTTTTTTTTCAGGGGCTCGGGAGAATCCTCTCCACAGCCAGGGATCAGCGTCTATCTGGG[CG]AGGGCAGTGATTTATACAGTAGAATCCAGGGGTTACCGGGCTCCGCCCCTTCTCTCTCTC	GAGAGAGAGAAGGGGCGGAGCCCGGTAACCCCTGGATTCTACTGTATAAATCACTGCCCT[CG]CCCAGATAGACGCTGATCCCTGGCTGTGGAGAGGATTCTCCCGAGCCCCTGAAAAAAAAA	1	TSS1500;TSS200;TSS1500	S1PR1;S1PR1-DT;S1PR1	NM_001320730.2;NR_104626.1;NM_001400.5	chr1:101236229-101236512;chr1:101236889-101237189	S_Shore;N_Shore	TSS1500;TSS1500;TSS200;TSS200;TSS1500;TSS1500;TSS1500	ENSG00000170989.10;ENSG00000170989.10;ENSG00000225938.3;ENSG00000225938.3;ENSG00000170989.10;ENSG00000170989.10;ENSG00000170989.10	ENST00000475821.2;ENST00000561748.2;ENST00000432195.2;ENST00000686331.2;ENST00000305352.7;ENST00000649383.1;ENST00000475289.2			1:101701230-101702700	Unclassified	TRUE		EH38D4406175	EH38E2827750|DNase-H3K4me3;EH38E2827750|Low-DNase;EH38E2827750|pELS;EH38E2827750|pELS/CTCF-bound	9;33;43;2	Quies;TssA;TssBiv;TssFlnkU;TssFlnk;EnhWk;ReprPCWk;TssFlnkD;EnhBiv;EnhA2	825;395;216;105;99;5;6;7;3;2
cg02355924	cg02355924	-0.0982529	0.0176048	-5.58102	2.39112e-08	0.000998088	cg02355924_BC21	84667172	ACCAAATAAACAAATCTATTCCTCTTACCAAATAAACTACTATTTTTCTC						cg	F	B	C	2	II	2	216303744	Human	GRCh38	CCAAGTGAGCAAGTCTGTTCCTCTTGCCAAGTGAGCTGCTGTTTTTCTCG	CCCCTCCACCTGCCAAGTGAGCAAGTCTGTTCCTCTTGCCAAGTGAGCTGCTGTTTTTCT[CG]TTGGTTAAATGGGATGTTGGATAAATCATCTCTACTAGTCTGACAGTTTTTTATATTTAA	TTAAATATAAAAAACTGTCAGACTAGTAGAGATGATTTATCCAACATCCCATTTAACCAA[CG]AGAAAAACAGCAGCTCACTTGGCAAGAGGAACAGACTTGCTCACTTGGCAGGTGGAGGGG	1													FALSE		EH38D3243040			ReprPCWk;TxWk;Quies;ReprPC;EnhA1;EnhBiv;EnhWk;EnhA2;TssFlnkU;Het;TssA	176;130;1061;132;60;12;21;63;4;2;2
cg02357838	cg02357838	-0.00623063	0.00142259	-4.37978	1.188e-05	0.0418265	cg02357838_TC21	73781291	CTAAATTCCAAAAAATAACACTAAACCTATCRCAACCACRTTAAAATTCC						cg	R	T	C	2	II	12	112409218	Human	GRCh38	CGGAACCCCAACGTGGCTGCGACAGGCTCAGTGTCATCCTCTGGAACCCA	GACCAAGAGGCGACTTCCGGTCGGGGACGCTGGGAGACGCGAAACCTTTTGGCTTCAGTG[CG]GAACCCCAACGTGGCTGCGACAGGCTCAGTGTCATCCTCTGGAACCCAGGACCAGGAACA	TGTTCCTGGTCCTGGGTTCCAGAGGATGACACTGAGCCTGTCGCAGCCACGTTGGGGTTC[CG]CACTGAAGCCAAAAGGTTTCGCGTCTCCCAGCGTCCCCGACCGGAAGTCGCCTCTTGGTC	1	5UTR;exon_1;5UTR;exon_1;5UTR;exon_1	RPL6;RPL6;RPL6;RPL6;RPL6;RPL6	NM_001320138.2;NM_001320138.2;NM_001320139.2;NM_001320139.2;NM_001320140.2;NM_001320140.2	chr12:112409151-112409396	Island	exon_1;exon_1;5UTR;5UTR;TSS1500	RPL6;RPL6;RPL6;RPL6;ENSG00000089009.16	ENST00000550566.6;ENST00000549847.5;ENST00000550566.6;ENST00000549847.5;ENST00000548343.1			12:112846849-112847686	Promoter_Associated_Cell_type_specific	TRUE		EH38D4729984	EH38E3041823|Low-DNase;EH38E3041823|pELS	23;64	ZNF/Rpts;Het;TssA;Quies;TxWk;TssFlnkU;Tx	238;452;825;117;21;8;2	cg02357838
cg02390408	cg02390408	-0.0562052	0.00876115	-6.41528	1.40568e-10	4.59943e-05	cg02390408_BC21	66689875	TCTTAACTACATACCTATTCTAAAAAAACCATCTTAACCCTTATCAAACC						cg	F	B	C	2	II	1	47521609	Human	GRCh38	CTTGGCTGCATGCCTGTTCTGGAAGGGCCATCTTAGCCCTTGTCAGGCCG	TTATTTAAAGCTCTTGGCTGCATGCCTGTTCTGGAAGGGCCATCTTAGCCCTTGTCAGGC[CG]TGGCAGATTGAAGGGAAGCTTGCACATCACTTATTGAGGGTGACTTCTTTTATTCCATTA	TAATGGAATAAAAGAAGTCACCCTCAATAAGTGATGTGCAAGCTTCCCTTCAATCTGCCA[CG]GCCTGACAAGGGCTAAGATGGCCCTTCCAGAACAGGCATGCAGCCAAGAGCTTTAAATAA	1													FALSE		EH38D4378824	EH38E2809834|dELS;EH38E2809834|DNase-only;EH38E2809834|Low-DNase	4;3;80	Quies;ReprPCWk;ReprPC;EnhWk;EnhA1;EnhA2;TxWk;Het;EnhBiv	995;518;58;45;2;19;15;4;7
cg02392228	cg02392228	-0.045325	0.00982227	-4.61451	3.94019e-06	0.0213636	cg02392228_TC21	43781323	TAATATTAAACTCTCCCATTTTTTCCTTAAACACATAAACAAAAAAACCC						cg	R	T	C	2	II	19	4523333	Human	GRCh38	CGGGCCTCTTTGTCCATGTGTTCAAGGAAAAAATGGGAGAGTCCAATACC	GGTGAAGAACCCAGCTTGTGGCTCAAGTTGGCCTGAATAGGGTTCGAGGCCCTGCTCCCC[CG]GGCCTCTTTGTCCATGTGTTCAAGGAAAAAATGGGAGAGTCCAATACCAAAAAGGTGGTC	GACCACCTTTTTGGTATTGGACTCTCCCATTTTTTCCTTGAACACATGGACAAAGAGGCC[CG]GGGGAGCAGGGCCTCGAACCCTATTCAGGCCAACTTGAGCCACAAGCTGGGTTCTTCACC	1	3UTR;exon_8	PLIN5;PLIN5	NM_001013706.3;NM_001013706.3	chr19:4523680-4524008	N_Shore	exon_8;3UTR	PLIN5;PLIN5	ENST00000381848.7;ENST00000381848.7			19:4523287-4523623	Unclassified_Cell_type_specific	TRUE					Quies;TxWk;ReprPCWk;EnhA1;EnhG1;EnhA2;EnhWk;Tx;EnhBiv;Het	1131;118;337;8;2;30;29;2;2;4	cg02392228
cg02399464	cg02399464	-0.0486961	0.010249	-4.75131	2.02099e-06	0.014072	cg02399464_BC21	13700313	AACATACTAATACCACCTAAAAATCAATATACAAACTATACACCTAAAAC						cg	R	B	C	2	II	12	50088758	Human	GRCh38	ACATGCTAGTGCCACCTAGAGGTCAATGTGCAAACTGTACACCTGGAGCG	TATTTTAATGTCTAAGGAGATGGGGAGGTATAAAGTAGTCACTCTAGGTGTACACAGTAC[CG]CTCCAGGTGTACAGTTTGCACATTGACCTCTAGGTGGCACTAGCATGTTTAGTTAGGACC	TATTTTAATGTCTAAGGAGATGGGGAGGTATAAAGTAGTCACTCTAGGTGTACACAGTAC[CG]CTCCAGGTGTACAGTTTGCACATTGACCTCTAGGTGGCACTAGCATGTTTAGTTAGGACC	1				chr12:50085103-50085546	S_Shelf	exon_6	SMARCD1	ENST00000547247.5			12:50482172-50482895	Gene_Associated	TRUE		EH38D2557338	EH38E1610705|CTCF-only/CTCF-bound;EH38E1610705|Low-DNase;EH38E1610705|pELS/CTCF-bound	48;32;7	Quies;Tx;EnhG1;TxWk;EnhG2;TssFlnkU;EnhA1;EnhA2;EnhWk;TssFlnk;ReprPCWk	671;450;127;274;91;7;28;6;4;2;3	cg02399464
cg02423080	cg02423080	-0.0257395	0.00570929	-4.50835	6.53338e-06	0.0292454	cg02423080_TC21	18782879	ACTATAAAATCTACACCCTAAACACTACCATTCTCACCAATACCTCCTAC						cg	F	T	C	2	II	5	150043908	Human	GRCh38	CGTAGGAGGTACTGGTGAGAATGGCAGTGCTTAGGGTGCAGACTCCACAG	CTCAGCCGCTGACTGTGGAGTCTGCACCCTAAGCACTGCCATTCTCACCAGTACCTCCTA[CG]ACTCTGAGTTCTGTTTCTTCTGATCATATCTGGCCACAGCAAGTTTATGGTTTCCAAGAA	CTCAGCCGCTGACTGTGGAGTCTGCACCCTAAGCACTGCCATTCTCACCAGTACCTCCTA[CG]ACTCTGAGTTCTGTTTCTTCTGATCATATCTGGCCACAGCAAGTTTATGGTTTCCAAGAA	1													FALSE		EH38D5698684	EH38E3670075|dELS;EH38E3670075|DNase-only;EH38E3670075|Low-DNase	3;4;80	Quies;ReprPC;EnhA1;Tx;ReprPCWk;EnhG1;TxWk;EnhG2;EnhWk;EnhA2;TssFlnkD;TssFlnkU;Het	481;10;32;228;288;225;184;139;56;14;4;1;1	cg02423080
cg02426071	cg02426071	-0.0325578	0.00643553	-5.05908	4.21282e-07	0.00560786	cg02426071_TC21	99669881	AACAAACTCCTTAAAAATAATCCAATAAATCCAATCCCTTTTTTTACTAC						cg	F	T	C	2	II	16	30814208	Human	GRCh38	CGCAGCAAAAAAAGGGATTGGACTCACTGGACCACCTCCAAGGAGCCTGT	CTGTCAGACTGGACAGGCTCCTTGGAGGTGGTCCAGTGAGTCCAATCCCTTTTTTTGCTG[CG]GCTTAGACGAGGGGCCGCTGAGGATTCTCCGAATTCGCTGGATCTGGACCCAGACTTCCG	CTGTCAGACTGGACAGGCTCCTTGGAGGTGGTCCAGTGAGTCCAATCCCTTTTTTTGCTG[CG]GCTTAGACGAGGGGCCGCTGAGGATTCTCCGAATTCGCTGGATCTGGACCCAGACTTCCG	1				chr16:30814207-30814657	Island						16:30825180-30826305	Promoter_Associated	TRUE					ReprPCWk;Quies;TssFlnkU;EnhWk;TssA;TssFlnk;EnhA1;ReprPC;TssFlnkD;TxWk;EnhBiv;TssBiv;EnhA2	33;755;699;18;70;22;10;12;29;7;1;2;5	cg02426071
cg02426464	cg02426464	-0.0286837	0.00653452	-4.38956	1.1358e-05	0.0405802	cg02426464_TC21	14763492	ACCATAATAAACTACACAAATACCTAACCCTAACTAAAAAAACTAACTTC						cg	F	T	C	2	II	17	1578011	Human	GRCh38	CGAAGTCAGTTCCCCCAGCCAGGGTCAGGCACCTGTGCAGCTCATTATGG	TGGCCCCTGAGGCCATAATGAGCTGCACAGGTGCCTGACCCTGGCTGGGGGAACTGACTT[CG]TGTTGAATGCCAAGGCTTGTGAGCACCCAACTGTCTGCCCACTGACCTGCTTCCCACGAG	TGGCCCCTGAGGCCATAATGAGCTGCACAGGTGCCTGACCCTGGCTGGGGGAACTGACTT[CG]TGTTGAATGCCAAGGCTTGTGAGCACCCAACTGTCTGCCCACTGACCTGCTTCCCACGAG	1				chr17:1574753-1574965;chr17:1575290-1575920	S_Shelf;S_Shelf						17:1480856-1481405	Unclassified_Cell_type_specific	TRUE		EH38D4979629	EH38E3202872|dELS;EH38E3202872|Low-DNase	27;60	Tx;EnhA2;Quies;EnhA1;EnhWk;EnhG1;EnhG2;TxWk;TssFlnkU;TssA;ReprPCWk;EnhBiv	808;192;87;411;70;7;15;59;10;1;2;1	cg02426464
cg02436098	cg02436098	-0.0452649	0.00861134	-5.25643	1.46883e-07	0.0029406	cg02436098_BC21	99730367	AATAACCTATAAAAACTTAACCTCAATTTTACCAACTATAAACTAAAACC						cg	F	B	C	2	II	19	4640147	Human	GRCh38	GTGGCCTGTGGGGACTTGGCCTCAGTTTTGCCAGCTGTGAACTGGGACCG	ATGAGCTCCCAAGTGGCCTGTGGGGACTTGGCCTCAGTTTTGCCAGCTGTGAACTGGGAC[CG]TCGCTGCTAAGGTAATTGGCAGGTGATCTGAAGGACACCTGCCGCCTCCTGGCCTTTTCT	AGAAAAGGCCAGGAGGCGGCAGGTGTCCTTCAGATCACCTGCCAATTACCTTAGCAGCGA[CG]GTCCCAGTTCACAGCTGGCAAAACTGAGGCCAAGTCCCCACAGGCCACTTGGGAGCTCAT	1	5UTR;exon_1	TNFAIP8L1;TNFAIP8L1	NM_001167942.1;NM_001167942.1	chr19:4636195-4636555;chr19:4639206-4639738	S_Shelf;S_Shore	exon_1;exon_1;5UTR	TNFAIP8L1;TNFAIP8L1;TNFAIP8L1	ENST00000598107.1;ENST00000536716.1;ENST00000536716.1					FALSE		EH38D5102409	EH38E3285058|Low-DNase;EH38E3285058|PLS	84;3	TssFlnkD;TssFlnkU;TssA;TssFlnk;EnhWk;EnhA1;EnhG2;Quies	275;1080;156;130;6;6;4;6	cg02436098
cg02439189	cg02439189	-0.044969	0.00986512	-4.55839	5.15482e-06	0.0251191	cg02439189_TC21	47705880	CCAAAAATAAATACCAAAACAATTTCCAAACTTTATAACAACTTCTACTC						cg	F	T	C	2	II	20	3115452	Human	GRCh38	CGAGCAGAAGCTGTCACAAAGCTTGGAAATTGCCTTGGCATCCACCCTTG	AGGGCATAGAGCCAAGGGTGGATGCCAAGGCAATTTCCAAGCTTTGTGACAGCTTCTGCT[CG]TGGGACAGTGGACCTGTCGAGAGATGCGCACAGCACAACATCCAGAGACAGGCTCCGCAA	AGGGCATAGAGCCAAGGGTGGATGCCAAGGCAATTTCCAAGCTTTGTGACAGCTTCTGCT[CG]TGGGACAGTGGACCTGTCGAGAGATGCGCACAGCACAACATCCAGAGACAGGCTCCGCAA	1	exon_4;exon_4	UBOX5;UBOX5	NM_001267584.2;NM_014948.4			exon_4	UBOX5	ENST00000217173.7			20:3095249-3097248	Unclassified	TRUE		EH38D5304668	EH38E3416747|CTCF-only/CTCF-bound;EH38E3416747|DNase-only;EH38E3416747|Low-DNase	2;1;84	Quies;TxWk;EnhWk;TssFlnkD;EnhA1;EnhA2;EnhG1;Tx;TssFlnk	856;547;192;8;17;7;25;10;1
cg02441982	cg02441982	-0.01841	0.00330716	-5.56671	2.59596e-08	0.00104077	cg02441982_BC21	41663945	ACTTAAAAACCRTCTAAAACACTCCTATAAACATACAAAACRCCTAATAC						cg	F	B	C	2	II	17	78187560	Human	GRCh38	CTTAGAAGCCGTCTAGAGCACTCCTGTGGGCATGCAGAGCGCCTAGTGCG	CCAAGAAGGAAGCTTAGAAGCCGTCTAGAGCACTCCTGTGGGCATGCAGAGCGCCTAGTG[CG]TGCCAGGTCCCCAGTGCTTGAGCACCATGGTGTATTTTACCTTCTCCTAAGGATTTTTGT	ACAAAAATCCTTAGGAGAAGGTAAAATACACCATGGTGCTCAAGCACTGGGGACCTGGCA[CG]CACTAGGCGCTCTGCATGCCCACAGGAGTGCTCTAGACGGCTTCTAAGCTTCCTTCTTGG	1	TSS1500;TSS1500;TSS1500	TK1;TK1;TK1	NM_003258.5;NM_001346663.2;NM_001363848.1	chr17:78186996-78187368	S_Shore	TSS1500;TSS1500;TSS1500;TSS1500;TSS1500;TSS1500	ENSG00000167900.12;ENSG00000167900.12;ENSG00000167900.12;ENSG00000167900.12;ENSG00000167900.12;ENSG00000167900.12	ENST00000301634.12;ENST00000588734.5;ENST00000590862.5;ENST00000590430.5;ENST00000586613.1;ENST00000592126.1			17:76182344-76183759	Promoter_Associated	TRUE					TxWk;EnhWk;TssFlnkU;Tx;TssFlnkD;TssA;Quies;TssFlnk;EnhA2;EnhG1;EnhA1;EnhBiv;EnhG2;ReprPCWk;TssBiv	429;23;580;272;38;122;48;68;18;17;33;5;6;3;1	cg02441982
cg02441982	cg02441982	-0.01841	0.00330716	-5.56671	2.59596e-08	0.00104077	cg02441982_BC23	33646527	ACTTAAAAACCRTCTAAAACACTCCTATAAACATACAAAACRCCTAATAC						cg	F	B	C	2	II	17	78187560	Human	GRCh38	CTTAGAAGCCGTCTAGAGCACTCCTGTGGGCATGCAGAGCGCCTAGTGCG	CCAAGAAGGAAGCTTAGAAGCCGTCTAGAGCACTCCTGTGGGCATGCAGAGCGCCTAGTG[CG]TGCCAGGTCCCCAGTGCTTGAGCACCATGGTGTATTTTACCTTCTCCTAAGGATTTTTGT	ACAAAAATCCTTAGGAGAAGGTAAAATACACCATGGTGCTCAAGCACTGGGGACCTGGCA[CG]CACTAGGCGCTCTGCATGCCCACAGGAGTGCTCTAGACGGCTTCTAAGCTTCCTTCTTGG	3	TSS1500;TSS1500;TSS1500	TK1;TK1;TK1	NM_003258.5;NM_001346663.2;NM_001363848.1	chr17:78186996-78187368	S_Shore	TSS1500;TSS1500;TSS1500;TSS1500;TSS1500;TSS1500	ENSG00000167900.12;ENSG00000167900.12;ENSG00000167900.12;ENSG00000167900.12;ENSG00000167900.12;ENSG00000167900.12	ENST00000301634.12;ENST00000588734.5;ENST00000590862.5;ENST00000590430.5;ENST00000586613.1;ENST00000592126.1			17:76182344-76183759	Promoter_Associated	TRUE					TxWk;EnhWk;TssFlnkU;Tx;TssFlnkD;TssA;Quies;TssFlnk;EnhA2;EnhG1;EnhA1;EnhBiv;EnhG2;ReprPCWk;TssBiv	429;23;580;272;38;122;48;68;18;17;33;5;6;3;1	cg02441982
cg02441982	cg02441982	-0.01841	0.00330716	-5.56671	2.59596e-08	0.00104077	cg02441982_BC22	23716446	ACTTAAAAACCRTCTAAAACACTCCTATAAACATACAAAACRCCTAATAC						cg	F	B	C	2	II	17	78187560	Human	GRCh38	CTTAGAAGCCGTCTAGAGCACTCCTGTGGGCATGCAGAGCGCCTAGTGCG	CCAAGAAGGAAGCTTAGAAGCCGTCTAGAGCACTCCTGTGGGCATGCAGAGCGCCTAGTG[CG]TGCCAGGTCCCCAGTGCTTGAGCACCATGGTGTATTTTACCTTCTCCTAAGGATTTTTGT	ACAAAAATCCTTAGGAGAAGGTAAAATACACCATGGTGCTCAAGCACTGGGGACCTGGCA[CG]CACTAGGCGCTCTGCATGCCCACAGGAGTGCTCTAGACGGCTTCTAAGCTTCCTTCTTGG	2	TSS1500;TSS1500;TSS1500	TK1;TK1;TK1	NM_003258.5;NM_001346663.2;NM_001363848.1	chr17:78186996-78187368	S_Shore	TSS1500;TSS1500;TSS1500;TSS1500;TSS1500;TSS1500	ENSG00000167900.12;ENSG00000167900.12;ENSG00000167900.12;ENSG00000167900.12;ENSG00000167900.12;ENSG00000167900.12	ENST00000301634.12;ENST00000588734.5;ENST00000590862.5;ENST00000590430.5;ENST00000586613.1;ENST00000592126.1			17:76182344-76183759	Promoter_Associated	TRUE					TxWk;EnhWk;TssFlnkU;Tx;TssFlnkD;TssA;Quies;TssFlnk;EnhA2;EnhG1;EnhA1;EnhBiv;EnhG2;ReprPCWk;TssBiv	429;23;580;272;38;122;48;68;18;17;33;5;6;3;1	cg02441982
cg02447451	cg02447451	-0.0537718	0.00987179	-5.44702	5.12221e-08	0.00156967	cg02447451_BC21	31609275	TTCAAAACCTTCCTAAAAACTAACTCTATACTAAACTCAATACCAAAATC						cg	F	B	C	2	II	2	235459178	Human	GRCh38	TCAGAACCTTCCTAAGGGCTGGCTCTGTGCTGGGCTCAGTGCCAGGGTCG	AAGGCCAGCGTTTCAGAACCTTCCTAAGGGCTGGCTCTGTGCTGGGCTCAGTGCCAGGGT[CG]TTACGGTGATGGCTGTACTGAATCTTCACTACTGTGTGAAAGGCAGGCAATCTATCACAG	CTGTGATAGATTGCCTGCCTTTCACACAGTAGTGAAGATTCAGTACAGCCATCACCGTAA[CG]ACCCTGGCACTGAGCCCAGCACAGAGCCAGCCCTTAGGAAGGTTCTGAAACGCTGGCCTT	1													FALSE		EH38D5292035	EH38E3408934|dELS;EH38E3408934|DNase-only;EH38E3408934|Low-DNase	6;20;61	Quies;ReprPCWk;EnhA1;TxWk;EnhWk;EnhA2;ReprPC;Het;EnhBiv;TssFlnkD	970;313;53;121;151;42;6;1;4;2
cg02474460	cg02474460	-0.0442372	0.00892046	-4.95907	7.08299e-07	0.00751287	cg02474460_BC21	6653330	CCCTATATCTAATACTATATTCTTTTTCTTAAAAAATTCCCCCATCAAAC						cg	F	B	C	2	II	7	28200720	Human	GRCh38	CCTGTGTCTAATGCTGTATTCTTTTTCTTAAAGAGTTCCCCCATCAGACG	GTCCTACAAGACCCTGTGTCTAATGCTGTATTCTTTTTCTTAAAGAGTTCCCCCATCAGA[CG]TATTAGCATCAAGCACCACAAAACCTCATATCCTCTGTTGGTGCCATAGTAATTATCACA	TGTGATAATTACTATGGCACCAACAGAGGATATGAGGTTTTGTGGTGCTTGATGCTAATA[CG]TCTGATGGGGGAACTCTTTAAGAAAAAGAATACAGCATTAGACACAGGGTCTTGTAGGAC	1									chr7:28200671-28200982				FALSE		EH38D5840109	EH38E3764271|Low-DNase	87	Quies;ReprPCWk;TxWk;EnhWk;TssFlnkD;ReprPC;EnhA1;EnhA2;EnhG2;TssFlnkU;Het;EnhBiv	1252;82;167;88;3;6;41;19;1;1;2;1
cg02489245	cg02489245	-0.030607	0.00686279	-4.45985	8.20174e-06	0.0334746	cg02489245_BC21	68796231	AACCCAAATTATTTATAAAATACAAAATCCCTAATCCTAACTAAAACACC						cg	F	B	C	2	II	15	53203089	Human	GRCh38	GCCCAAGTTATTTGTGGAATGCAGGGTCCCTGATCCTAGCTAAAGCACCG	TTGCCTACCCTGGCCCAAGTTATTTGTGGAATGCAGGGTCCCTGATCCTAGCTAAAGCAC[CG]CTGTCTTTACTGTGTGATGATCTATTATCATGCTTTTACTGAGTTTGAAATGGCATCAGA	TCTGATGCCATTTCAAACTCAGTAAAAGCATGATAATAGATCATCACACAGTAAAGACAG[CG]GTGCTTTAGCTAGGATCAGGGACCCTGCATTCCACAAATAACTTGGGCCAGGGTAGGCAA	1													FALSE		EH38D4875519			Quies;EnhA2;ReprPCWk;EnhA1;EnhWk;Het;ZNF/Rpts;TssFlnkD;TxWk;TssFlnkU;ReprPC	1482;3;85;7;48;29;2;1;4;1;1	cg02489245
cg02491385	cg02491385	-0.053789	0.0119774	-4.49087	7.09334e-06	0.0307347	cg02491385_BC21	43622537	TAAATTTTCATTTCTATATTCTCCTTTATTCCAAATTCAAAATACTACTC						cg	R	B	C	2	II	17	52985309	Human	GRCh38	GAGTTTTCATTTCTGTGTTCTCCTTTATTCCAAGTTCAAAATGCTGCTCG	TAGTGAGAGGGAGAAATGAGAGAGACAAGGAGGGTTTTTAAGATCTATGATTAGGTTTCA[CG]AGCAGCATTTTGAACTTGGAATAAAGGAGAACACAGAAATGAAAACTCATTCTGCCATAT	TAGTGAGAGGGAGAAATGAGAGAGACAAGGAGGGTTTTTAAGATCTATGATTAGGTTTCA[CG]AGCAGCATTTTGAACTTGGAATAAAGGAGAACACAGAAATGAAAACTCATTCTGCCATAT	1	TSS200	LINC02876	NR_164143.1			TSS1500;TSS1500	ENSG00000227011.4;ENSG00000227011.4	ENST00000649605.1;ENST00000623702.1					FALSE		EH38D5023414			Quies;TxWk;Het;Tx;EnhWk;EnhG1;ZNF/Rpts;EnhA2;ReprPCWk;EnhA1;TssFlnkD;EnhG2	957;462;95;82;13;7;5;11;12;16;2;1
cg02491912	cg02491912	-0.0242536	0.0054473	-4.4524	8.49142e-06	0.0340573	cg02491912_BC21	9747456	AATACCCCAAAAACTACTAAAATTTTAAAAACAAACAAATATTTACACCC						cg	R	B	C	2	II	16	74775193	Human	GRCh38	GTACCCCAAAAGCTACTGAAATTTTAAAAACAAACAAATATTTGCACCCG	TGGGACCCTCTGGCTCCAGGAGGTGCCCGAGAGAGCGAGAGGCGAATGAGGTGCTCGCCT[CG]GGTGCAAATATTTGTTTGTTTTTAAAATTTCAGTAGCTTTTGGGGTACCAGTGGTTTTTG	TGGGACCCTCTGGCTCCAGGAGGTGCCCGAGAGAGCGAGAGGCGAATGAGGTGCTCGCCT[CG]GGTGCAAATATTTGTTTGTTTTTAAAATTTCAGTAGCTTTTGGGGTACCAGTGGTTTTTG	1	TSS1500	FA2H	NM_024306.5	chr16:74774415-74775088	S_Shore	TSS1500;TSS1500	ENSG00000103089.9;ENSG00000103089.9	ENST00000219368.8;ENST00000567683.5			16:74808049-74809351	Unclassified	TRUE		EH38D4962041	EH38E3190811|Low-DNase;EH38E3190811|pELS	86;1	Quies;EnhWk;TssBiv;EnhA2;TxWk;TssFlnkU;EnhBiv;EnhA1;ReprPCWk;TssA;ReprPC;TssFlnk;TssFlnkD;Het;ZNF/Rpts;Tx	221;81;520;227;99;67;92;136;42;29;41;65;40;1;1;1	cg02491912
cg02495298	cg02495298	-0.0546622	0.0123975	-4.40915	1.03778e-05	0.0383898	cg02495298_TC21	22723588	AAAACTAAATACACAATAAACCCACATAACCATTATTATTACATCAAAAC						cg	R	T	C	2	II	13	27482873	Human	GRCh38	CGTTCTGATGTAATAATAATGGCTATGTGGGTTTACTGTGCACCCAGCCT	AATCTCTGGCAGAGAGAGATAGTGGGAAAACATACCATTGATAGAGAAGAAACATGGAGA[CG]TTCTGATGTAATAATAATGGCTATGTGGGTTTACTGTGCACCCAGCCTTGCTCAATGCCT	AGGCATTGAGCAAGGCTGGGTGCACAGTAAACCCACATAGCCATTATTATTACATCAGAA[CG]TCTCCATGTTTCTTCTCTATCAATGGTATGTTTTCCCACTATCTCTCTCTGCCAGAGATT	1													FALSE					ReprPCWk;Quies;TssA;Het;ReprPC;EnhWk;TssFlnkD;TssFlnkU;ZNF/Rpts;EnhA1;TxWk;EnhA2;TssFlnk;EnhBiv	430;787;5;85;248;14;5;22;16;16;8;15;11;1
cg02509804	cg02509804	-0.0275766	0.00564641	-4.88391	1.04004e-06	0.00927833	cg02509804_BC21	99621329	CTCTCCACCAACTAAAAATATTTTATCCTTCCTCTAAACTCCCTTAACAC						cg	F	B	C	2	II	8	25880879	Human	GRCh38	TCTCCACCAGCTGGAAGTATTTTGTCCTTCCTCTGAACTCCCTTAGCACG	AATCTTCCCACCTCTCCACCAGCTGGAAGTATTTTGTCCTTCCTCTGAACTCCCTTAGCA[CG]TTATATCTTAAAAAAAAATCACTTTCTAAACTATACCCACCCAATTTTTCAACTCTGAAA	TTTCAGAGTTGAAAAATTGGGTGGGTATAGTTTAGAAAGTGATTTTTTTTTAAGATATAA[CG]TGCTAAGGGAGTTCAGAGGAAGGACAAAATACTTCCAGCTGGTGGAGAGGTGGGAAGATT	1									chr8:25880543-25880891				FALSE					ReprPCWk;Quies;ReprPC;TxWk;EnhA1;EnhWk;EnhA2;Tx;Het;EnhG1	604;878;144;23;1;5;2;1;4;1
cg02514715	cg02514715	-0.0515533	0.00885075	-5.82474	5.7202e-09	0.00046049	cg02514715_BC21	15683257	CAAAATTATATTCACATCCCTAATCCAATCTAAAACCTTATAACAACCTC						cg	F	B	C	2	II	1	17766303	Human	GRCh38	AAAATTGTGTTCACATCCCTGATCCAATCTGGAGCCTTGTAGCAGCCTCG	CCCTGTCTTCCCAAAATTGTGTTCACATCCCTGATCCAATCTGGAGCCTTGTAGCAGCCT[CG]TGAGGCTGGGACTGGTACTTTGGCCCTGACTTAATCGGCAGAGAACTTGTGCATTCCTTG	CAAGGAATGCACAAGTTCTCTGCCGATTAAGTCAGGGCCAAAGTACCAGTCCCAGCCTCA[CG]AGGCTGCTACAAGGCTCCAGATTGGATCAGGGATGTGAACACAATTTTGGGAAGACAGGG	1													FALSE		EH38D2132917	EH38E1323464|dELS;EH38E1323464|dELS/CTCF-bound;EH38E1323464|DNase-only;EH38E1323464|Low-DNase	6;1;4;76	TssA;TssFlnk;Quies;ReprPCWk;ReprPC;TxWk;EnhA1;EnhWk;EnhA2;Het;ZNF/Rpts;EnhBiv	617;200;466;143;24;38;129;15;25;4;1;1
cg02531797	cg02531797	-0.0203644	0.00395121	-5.15396	2.55038e-07	0.00419786	cg02531797_TC21	55664948	CTAATACCCTTAAATCCCTCCTCTTTATACAAATAACCTCCRCATACTCC						cg	F	T	C	2	II	6	31620540	Human	GRCh38	CGGAGCATGCGGAGGTTATTTGCATAAAGAGGAGGGACTTAAGGGCACTA	CAATCGGGGTCCTAGTGCCCTTAAGTCCCTCCTCTTTATGCAAATAACCTCCGCATGCTC[CG]CGCGCCCGGCCCTTTTTTTTTTTTTTTTAAACTAAAGACAGCCCTGGAAGTAGAGGGTTA	CAATCGGGGTCCTAGTGCCCTTAAGTCCCTCCTCTTTATGCAAATAACCTCCGCATGCTC[CG]CGCGCCCGGCCCTTTTTTTTTTTTTTTTAAACTAAAGACAGCCCTGGAAGTAGAGGGTTA	1	TSS200;TSS200	PRRC2A;PRRC2A	NM_080686.3_7;NM_004638.4_7	chr6:31620002-31621247	Island	TSS200;TSS200;TSS200;TSS200	ENSG00000289375.1;ENSG00000204469.13;ENSG00000204469.13;ENSG00000204469.13	ENST00000691329.1;ENST00000376033.3;ENST00000376007.8;ENST00000469577.5			6:31587577-31589180	Promoter_Associated	TRUE		EH38D5743510	EH38E3700720|pELS;EH38E3700720|pELS/CTCF-bound	85;2	TssA;EnhA2;TssFlnkU;TssFlnk	1494;13;54;102	cg02531797
cg02546941	cg02546941	-0.0150151	0.00324204	-4.63138	3.63237e-06	0.0204374	cg02546941_TC21	16760381	TAATAAATATTCAACCATAATACCCAAACACRACCCTACTATAAATCACC						cg	F	T	C	2	II	17	75034582	Human	GRCh38	CGGTGACCCACAGCAGGGCCGTGTTTGGGCACTATGGTTGAACACCTATC	CACGTGCTCCTTGATAGGTGTTCAACCATAGTGCCCAAACACGGCCCTGCTGTGGGTCAC[CG]CGCTCCAAGCCTGAGAAGCCATGGGGACGACAGGATGAACCGCTGGCTGGGCGCGGCGTC	CACGTGCTCCTTGATAGGTGTTCAACCATAGTGCCCAAACACGGCCCTGCTGTGGGTCAC[CG]CGCTCCAAGCCTGAGAAGCCATGGGGACGACAGGATGAACCGCTGGCTGGGCGCGGCGTC	1				chr17:75034581-75035065	Island						17:73029662-73031584	Promoter_Associated	TRUE		EH38D5040158	EH38E3242986|DNase-H3K4me3;EH38E3242986|Low-DNase;EH38E3242986|pELS;EH38E3242986|pELS/CTCF-bound	2;5;48;32	Quies;ReprPC;TssA;ReprPCWk;TssFlnkU;EnhA1;EnhA2;TssBiv;TssFlnk;TxWk;TssFlnkD;EnhWk;Het	256;75;553;472;250;3;8;8;8;19;7;3;1	cg02546941
cg02567151	cg02567151	0.0469722	0.00955187	4.91759	8.76162e-07	0.00843185	cg02567151_BC21	26609491	AAAATCCAAAATCTACATCAAACTTAACTATATATACCTATCACCCCTAC						cg	F	B	C	2	II	20	63284085	Human	GRCh38	AGATCCAGGATCTGCATCAGGCTTGGCTGTGTGTGCCTGTCACCCCTGCG	GGCTCTCCTTTAAGATCCAGGATCTGCATCAGGCTTGGCTGTGTGTGCCTGTCACCCCTG[CG]CAGTACCACTGCGCTCCCCCCGGGCAAAAAAATGAGACCCCCATCTCCAAAACACACAGA	TCTGTGTGTTTTGGAGATGGGGGTCTCATTTTTTTGCCCGGGGGGAGCGCAGTGGTACTG[CG]CAGGGGTGACAGGCACACACAGCCAAGCCTGATGCAGATCCTGGATCTTAAAGGAGAGCC	1	TSS1500;TSS1500	ARFGAP1;ARFGAP1	NR_104022.2;NR_104023.2	chr20:63284582-63284938;chr20:63286147-63286416;chr20:63287672-63288451	N_Shore;N_Shelf;N_Shelf	TSS200;TSS1500;TSS1500;TSS1500;TSS1500	ENSG00000101199.13;ENSG00000101199.13;ENSG00000101199.13;ENSG00000101199.13;ENSG00000101199.13	ENST00000518794.6;ENST00000468975.6;ENST00000520022.2;ENST00000518691.1;ENST00000518618.2			20:61915371-61916083	Unclassified_Cell_type_specific	TRUE					TxWk;Tx;EnhG1;EnhA2;TssFlnkU;TssFlnk;EnhG2;TssFlnkD;Quies;ReprPCWk;TssA	341;363;35;13;11;29;8;8;19;1;5	cg02567151
cg02582028	cg02582028	-0.0360672	0.00811022	-4.44713	8.70257e-06	0.0345625	cg02582028_BC21	56609447	TACCCCCAATATCATATAACCTTAAATAACTCATCCCATCTCTCTAAACC						cg	R	B	C	2	II	8	129984468	Human	GRCh38	GCCCCCAGTATCATGTGGCCTTGGGTGACTCATCCCATCTCTCTGAGCCG	GGAAGCCCACAGTCACTGCTGTTACTGTGGTTGCTACCCTCATCTCACTGGGAAAGAAGC[CG]GCTCAGAGAGATGGGATGAGTCACCCAAGGCCACATGATACTGGGGGCAGGGCTGGCACA	GGAAGCCCACAGTCACTGCTGTTACTGTGGTTGCTACCCTCATCTCACTGGGAAAGAAGC[CG]GCTCAGAGAGATGGGATGAGTCACCCAAGGCCACATGATACTGGGGGCAGGGCTGGCACA	1				chr8:129983675-129983903	S_Shore				chr8:129984423-129984557		8:130996564-130996912	Unclassified_Cell_type_specific	TRUE		EH38D5990714	EH38E3860381|dELS;EH38E3860381|DNase-H3K4me3;EH38E3860381|DNase-only;EH38E3860381|Low-DNase	24;5;21;37	EnhA2;Quies;EnhWk;TxWk;EnhA1;TssFlnkU;ReprPCWk;Tx;TssFlnkD;TssFlnk;TssA;ReprPC;EnhG2	86;822;305;60;327;35;14;2;6;1;2;1;2
cg02584094	cg02584094	-0.0343896	0.007239	-4.7506	2.02817e-06	0.0141003	cg02584094_TC21	26741183	CCAAAACTCTTAAAACTCATAAATTTCCTAAAAAATAAACTCTAACAAAC						cg	R	T	C	2	II	17	6557955	Human	GRCh38	CGTTTGCCAGAGCTCACCTCCCAGGAAACCCATGAGTCCCAAGAGCTCTG	TCCCAAGGCCTTCTACCCAAACTCCCTAGTATGGATTCACCCAGGGAGAACAACCATCCA[CG]TTTGCCAGAGCTCACCTCCCAGGAAACCCATGAGTCCCAAGAGCTCTGGATCCCAGAGCC	GGCTCTGGGATCCAGAGCTCTTGGGACTCATGGGTTTCCTGGGAGGTGAGCTCTGGCAAA[CG]TGGATGGTTGTTCTCCCTGGGTGAATCCATACTAGGGAGTTTGGGTAGAAGGCCTTGGGA	1	TSS1500;TSS1500	PITPNM3;PITPNM3	NM_031220.4;NM_001165966.2	chr17:6555809-6556604	S_Shore	TSS1500;TSS1500	ENSG00000091622.16;ENSG00000091622.16	ENST00000262483.13;ENST00000421306.7					FALSE					TssBiv;TxWk;ReprPC;ReprPCWk;EnhBiv;Quies;EnhA1;EnhWk;TssFlnkD;TssFlnk;EnhA2;TssFlnkU;ZNF/Rpts;TssA;EnhG1	294;61;771;259;92;96;3;27;11;20;17;8;1;2;1
cg02589672	cg02589672	-0.0209344	0.00441431	-4.7424	2.11204e-06	0.0145143	cg02589672_TC21	48650119	AACTAAAACTACCAAATAAAAATAATAAACTCCACRCCCACAACAAACAC						cg	R	T	C	2	II	22	41367124	Human	GRCh38	CGTGCTTGCTGTGGGCGTGGAGCTTACCATTCTCACCTGGCAGCCCCAGT	TCCCAGCCCGGGATGGTTTCCACTGCGTGCCTGGGCCTCCAGGGCACCTCCATGCTGATG[CG]TGCTTGCTGTGGGCGTGGAGCTTACCATTCTCACCTGGCAGCCCCAGTTATGGCTCCCAG	CTGGGAGCCATAACTGGGGCTGCCAGGTGAGAATGGTAAGCTCCACGCCCACAGCAAGCA[CG]CATCAGCATGGAGGTGCCCTGGAGGCCCAGGCACGCAGTGGAAACCATCCCGGGCTGGGA	1	TSS1500	TEF	NM_001145398.3			TSS1500	ENSG00000167074.15	ENST00000406644.7			22:41763076-41763760	Unclassified_Cell_type_specific	TRUE					TxWk;EnhA1;Tx;TssFlnkD;TssFlnkU;Quies;EnhWk;TssFlnk;ZNF/Rpts;EnhBiv;EnhA2;TssA;EnhG1;ReprPC;ReprPCWk	577;253;231;94;282;48;109;10;1;25;15;9;5;1;3	cg02589672
cg02602310	cg02602310	-0.0338667	0.00725181	-4.6701	3.01052e-06	0.0181119	cg02602310_BC21	80754384	TTTTTAAAACTTACTCTAAATCTAAACACCAAACTACCACRCTTACAAAC						cg	F	B	C	2	II	17	49909954	Human	GRCh38	TTTTAAAGCTTGCTCTAGGTCTGAGCACCAGGCTGCCACGCTTACAGACG	TTGAATTTTTTTTTTTAAAGCTTGCTCTAGGTCTGAGCACCAGGCTGCCACGCTTACAGA[CG]TCATTTCACTCGTTCTCTTTTAGGGAGACCCGAACCCTGCCCTCAGGGAGCTCCCCAGCA	TGCTGGGGAGCTCCCTGAGGGCAGGGTTCGGGTCTCCCTAAAAGAGAACGAGTGAAATGA[CG]TCTGTAAGCGTGGCAGCCTGGTGCTCAGACCTAGAGCAAGCTTTAAAAAAAAAAATTCAA	1				chr17:49910160-49910737	N_Shore								FALSE					Quies;ReprPC;EnhBiv;TssBiv;ReprPCWk;EnhA2;TxWk;Het;EnhA1;EnhWk;TssFlnkD;TssFlnk	734;687;43;39;77;4;8;63;2;4;1;1
cg02602508	cg02602508	-0.0196642	0.00385651	-5.09897	3.41509e-07	0.00495608	cg02602508_BC21	31630102	CTTTCACRTACATTTTTCAACATATTCTTCTTCTTACTTCATTTCCAATC						cg	F	B	C	2	II	X	2874371	Human	GRCh38	TTTCACGTGCATTTTTCAGCATGTTCTTCTTCTTACTTCATTTCCAGTCG	ATGCTGATCTGCTTTCACGTGCATTTTTCAGCATGTTCTTCTTCTTACTTCATTTCCAGT[CG]TTCTACATCATTGGCTTCTACTCAGCCTTCAGGCTTCATTTTAGATATTACTTCCCTAGG	CCTAGGGAAGTAATATCTAAAATGAAGCCTGAAGGCTGAGTAGAAGCCAATGATGTAGAA[CG]ACTGGAAATGAAGTAAGAAGAAGAACATGCTGAAAAATGCACGTGAAAGCAGATCAGCAT	1													FALSE		EH38D6088211	EH38E3923374|dELS;EH38E3923374|Low-DNase	1;86	Quies;ReprPC;Tx;ReprPCWk;Het;TxWk;EnhG1;ZNF/Rpts;EnhWk;EnhA2	1405;2;15;42;105;75;3;14;1;1
cg02609480	cg02609480	-0.0490376	0.0101892	-4.8127	1.48902e-06	0.0115121	cg02609480_BC21	22765100	CAAATCRAAACTCAAAACAATTTCACAAAATAAATACCTACTTAAACCAC						cg	R	B	C	2	II	21	45551637	Human	GRCh38	AAATCGAAGCTCAAAACAATTTCACAAAATGAATACCTGCTTAGGCCACG	TAGGCAGATGTTGTTGTTTGTTGGTTTAATATGTCGTTTTATAAAGTTCAGATCAAAGAA[CG]TGGCCTAAGCAGGTATTCATTTTGTGAAATTGTTTTGAGCTTCGATTTGTGGCTTGGTTT	TAGGCAGATGTTGTTGTTTGTTGGTTTAATATGTCGTTTTATAAAGTTCAGATCAAAGAA[CG]TGGCCTAAGCAGGTATTCATTTTGTGAAATTGTTTTGAGCTTCGATTTGTGGCTTGGTTT	1				chr21:45553992-45554539;chr21:45554872-45555134;chr21:45555563-45556427	N_Shelf;N_Shelf;N_Shelf						21:46971274-46971564	Unclassified_Cell_type_specific	TRUE		EH38D5376918	EH38E3464115|dELS;EH38E3464115|DNase-only;EH38E3464115|Low-DNase	13;8;66	TxWk;EnhG1;Quies;EnhA1;TssFlnkU;EnhWk;EnhA2;ReprPC;Tx;ReprPCWk;EnhBiv;EnhG2;TssFlnkD;Het	725;29;268;151;35;178;95;7;109;59;3;1;2;1
cg02620741	cg02620741	-0.0260005	0.00596593	-4.35817	1.31157e-05	0.0442571	cg02620741_TC21	41810243	AACTAACCCTAACTCCAAATACAACTAAACTAAATTTTTCTACCCTAATC						cg	R	T	C	2	II	6	37548117	Human	GRCh38	CGATCAGGGCAGAAAAATCTAGCTCAGCTGCATCTGGAGCCAGGGTTAGC	GTAAATTAACCACCCTCTGAGGCTGGTGGGTCCAACCAGCCTTGCACAGATGGCAGCCCA[CG]ATCAGGGCAGAAAAATCTAGCTCAGCTGCATCTGGAGCCAGGGTTAGCCTCCCTTCTGCC	GGCAGAAGGGAGGCTAACCCTGGCTCCAGATGCAGCTGAGCTAGATTTTTCTGCCCTGAT[CG]TGGGCTGCCATCTGTGCAAGGCTGGTTGGACCCACCAGCCTCAGAGGGTGGTTAATTTAC	1						TSS1500;TSS1500	ENSG00000229559.2;ENSG00000229559.2	ENST00000445172.1;ENST00000434901.2			6:37515255-37516048	Unclassified_Cell_type_specific	TRUE					Quies;EnhBiv;ReprPCWk;EnhWk;EnhA1;EnhA2;TxWk;ZNF/Rpts;TssFlnkD;Het;ReprPC	750;75;332;279;119;18;69;4;1;4;12
cg02659784	cg02659784	-0.0296926	0.00687852	-4.31672	1.58364e-05	0.049468	cg02659784_BC21	52764461	TCTAAATTAATTAATAAACTAACCAAAAATACCACCRACTAAATACCACC						cg	F	B	C	2	II	1	64969790	Human	GRCh38	CTGAATTGGTTAATAAGCTGACCAAGGATGCCACCGACTGGATGCCACCG	CTCCCAAATTTTCTGAATTGGTTAATAAGCTGACCAAGGATGCCACCGACTGGATGCCAC[CG]ACTAAACAGGATAAGAAATTCAGTTTTATGTTTGAGAAGAGGAAAGTTTTAAACAGTCAC	GTGACTGTTTAAAACTTTCCTCTTCTCAAACATAAAACTGAATTTCTTATCCTGTTTAGT[CG]GTGGCATCCAGTCGGTGGCATCCTTGGTCAGCTTATTAACCAATTCAGAAAATTTGGGAG	1				chr1:64965772-64966931	S_Shelf								FALSE		EH38D4389555	EH38E2816851|CTCF-only/CTCF-bound;EH38E2816851|DNase-only;EH38E2816851|Low-DNase	3;1;83	Quies;ReprPCWk;TxWk;EnhWk;ReprPC;EnhA1;EnhA2;TssFlnkD	1187;53;251;143;5;11;12;1
cg02666302	cg02666302	-0.0497488	0.00964254	-5.15931	2.47867e-07	0.00414199	cg02666302_TC21	81620959	TATACCTTCCRAAAAAAACAACCCAAAACTCCTAAAAAAACAAACAACAC						cg	F	T	C	2	II	5	181042248	Human	GRCh38	CGTGCTGCTTGTCCTCCCAGGAGCCTTGGGCTGCTCCCTCCGGAAGGCAC	TTATTTCTCCCTGTGCCTTCCGGAGGGAGCAGCCCAAGGCTCCTGGGAGGACAAGCAGCA[CG]TGCCCGCCGGCAGAGCTCAGCTCCAGCTGGAGGACCCCTTTGTGGTCCTTGCGCACACTG	TTATTTCTCCCTGTGCCTTCCGGAGGGAGCAGCCCAAGGCTCCTGGGAGGACAAGCAGCA[CG]TGCCCGCCGGCAGAGCTCAGCTCCAGCTGGAGGACCCCTTTGTGGTCCTTGCGCACACTG	1													FALSE		EH38D5721187			ReprPC;ReprPCWk;TssBiv;TssA;TxWk;TssFlnk;Quies;EnhBiv;Het;EnhA1;EnhA2	545;136;19;42;6;27;41;6;6;1;4	cg02666302
cg02667934	cg02667934	-0.0171005	0.00388686	-4.39958	1.08462e-05	0.0395316	cg02667934_TC21	49790281	AATATCTTAACTTTCCTTCCTTCTCCAATCTACCTTAAATATAAAATCAC						cg	F	T	C	2	II	3	188674449	Human	GRCh38	CGTGACTCTATACCCAAGGCAGATTGGAGAAGGAAGGAAAGCTAAGACAT	CTCATCACAGGAATGTCTTAGCTTTCCTTCCTTCTCCAATCTGCCTTGGGTATAGAGTCA[CG]CCTTTAAATCTTTTAGCATACCACAATGTAACTTACATAAGGAAATGTTTAATTTGGGAA	CTCATCACAGGAATGTCTTAGCTTTCCTTCCTTCTCCAATCTGCCTTGGGTATAGAGTCA[CG]CCTTTAAATCTTTTAGCATACCACAATGTAACTTACATAAGGAAATGTTTAATTTGGGAA	1													FALSE		EH38D5524537			Quies;ReprPCWk;EnhA1;TxWk;EnhA2;EnhWk;TssFlnkU;Het	1225;11;89;130;82;124;1;1
cg02670426	cg02670426	-0.0458506	0.00753502	-6.085	1.16488e-09	0.000168796	cg02670426_BC21	90612105	TTATATCTCATAAAATCCATTCTTTCTCCCCTACACTAAAATATAACAAC						cg	F	B	C	2	II	7	24820331	Human	GRCh38	TGTGTCTCATGAAATCCATTCTTTCTCCCCTGCACTGAGATGTAACAGCG	TGAATGAACTTTTGTGTCTCATGAAATCCATTCTTTCTCCCCTGCACTGAGATGTAACAG[CG]TGCAATGCTGAACTGAAGGAAAAACTTCTTTAGTTTCCCTCATCAAGTGTGTCCTCAAGA	TCTTGAGGACACACTTGATGAGGGAAACTAAAGAAGTTTTTCCTTCAGTTCAGCATTGCA[CG]CTGTTACATCTCAGTGCAGGGGAGAAAGAATGGATTTCATGAGACACAAAAGTTCATTCA	1											7:24859727-24860336	Unclassified	TRUE		EH38D5837722	EH38E3762479|CTCF-only/CTCF-bound;EH38E3762479|dELS/CTCF-bound;EH38E3762479|DNase-only;EH38E3762479|Low-DNase	48;29;1;9	Quies;TxWk;EnhWk;EnhA1;EnhA2;ReprPCWk;Het;TssFlnkD;EnhG2;EnhG1;Tx;TssFlnkU	900;239;182;296;27;4;2;1;4;2;4;2
cg02672229	cg02672229	-0.0473493	0.0099262	-4.77013	1.84106e-06	0.0131992	cg02672229_BC21	19655550	ATTTCCAAACCTACCTAAACAAATACATAAATAATACCAAAAAAAATAAC						cg	R	B	C	2	II	10	99834499	Human	GRCh38	TTTCCAAACCTACCTGAACAGATACATAAATAATGCCAAGAGGAATGACG	CCTGGGGATAATCAGCACCCTTGTCATGATCTGCATGGCCACTCCTGTCTTCACCATCAT[CG]TCATTCCTCTTGGCATTATTTATGTATCTGTTCAGGTAGGTTTGGAAATGGCTAAGTCAT	CCTGGGGATAATCAGCACCCTTGTCATGATCTGCATGGCCACTCCTGTCTTCACCATCAT[CG]TCATTCCTCTTGGCATTATTTATGTATCTGTTCAGGTAGGTTTGGAAATGGCTAAGTCAT	1	exon_24	ABCC2	NM_000392.5			exon_24	ABCC2	ENST00000647814.1					FALSE		EH38D4543890	EH38E2919865|dELS;EH38E2919865|DNase-only;EH38E2919865|Low-DNase	7;4;76	ReprPCWk;Quies;TxWk;EnhWk;EnhA1;EnhA2;EnhG1;EnhG2;ReprPC;Tx;Het	340;1076;44;51;98;13;8;10;5;15;3	cg02672229
cg02691398	cg02691398	-0.0120687	0.0026363	-4.57789	4.69681e-06	0.023773	cg02691398_TC21	61788270	CRAAAACTACCAATCCCAAAAAATTTCAAAACAAATCTTCCCCTAAATCC						cg	R	T	C	2	II	19	49666244	Human	GRCh38	CGGACCTAGGGGAAGATTTGCCCTGAAACCTCTTGGGATTGGTAGTTCCC	TCCAGCAGGGGTCGGAGATTTGGAACTACACCTCACAGCAGGCTGCGCGGCGAAGAAGCG[CG]GACCTAGGGGAAGATTTGCCCTGAAACCTCTTGGGATTGGTAGTTCCCGATGCTTTAAGG	CCTTAAAGCATCGGGAACTACCAATCCCAAGAGGTTTCAGGGCAAATCTTCCCCTAGGTC[CG]CGCTTCTTCGCCGCGCAGCCTGCTGTGAGGTGTAGTTCCAAATCTCCGACCCCTGCTGGA	1	TSS1500;TSS1500;TSS1500;TSS1500;TSS1500;TSS1500;TSS1500;TSS1500;TSS1500	IRF3;IRF3;IRF3;IRF3;IRF3;IRF3;IRF3;IRF3;IRF3	NM_001197122.2;NM_001571.6;NM_001197124.2;NM_001197123.2;NM_001197125.2;NM_001197127.2;NM_001197126.2;NM_001197128.2;NR_045568.2	chr19:49664433-49664941;chr19:49665578-49666085;chr19:49670123-49670496	S_Shore;S_Shore;N_Shelf	exon_1;exon_1;exon_1;exon_1;exon_1;exon_1;exon_1;exon_1;exon_1;5UTR;5UTR;5UTR;5UTR;5UTR;5UTR;5UTR;5UTR;5UTR;TSS1500;TSS1500;TSS1500;TSS1500;TSS1500;TSS1500;TSS1500;TSS1500;TSS1500;TSS1500;TSS1500;TSS1500;TSS1500;TSS1500;TSS1500;TSS1500;TSS1500;TSS1500;TSS1500;TSS1500;TSS1500;TSS1500;TSS1500;TSS1500;TSS1500	BCL2L12;BCL2L12;BCL2L12;BCL2L12;BCL2L12;BCL2L12;BCL2L12;BCL2L12;BCL2L12;BCL2L12;BCL2L12;BCL2L12;BCL2L12;BCL2L12;BCL2L12;BCL2L12;BCL2L12;BCL2L12;ENSG00000126456.16;ENSG00000126456.16;ENSG00000126456.16;ENSG00000126456.16;ENSG00000126456.16;ENSG00000126456.16;ENSG00000126456.16;ENSG00000126456.16;ENSG00000126456.16;ENSG00000126456.16;ENSG00000126456.16;ENSG00000126456.16;ENSG00000126456.16;ENSG0000…	ENST00000698553.1;ENST00000698554.1;ENST00000698555.1;ENST00000698556.1;ENST00000698557.1;ENST00000698558.1;ENST00000698559.1;ENST00000698560.1;ENST00000698561.1;ENST00000698553.1;ENST00000698554.1;ENST00000698555.1;ENST00000698556.1;ENST00000698557.1;ENST00000698558.1;ENST00000698559.1;ENST00000698560.1;ENST00000698561.1;ENST00000377135.8;ENST00000309877.11;ENST00000600911.5;ENST00000596822.5;EN…					FALSE		EH38D3070613	EH38E1961101|Low-DNase;EH38E1961101|PLS;EH38E1961101|PLS/CTCF-bound	32;28;27	ReprPCWk;TxWk;TssA;Quies;TssFlnkU;TssFlnkD;EnhA2;TssFlnk;ReprPC;EnhA1;EnhWk	230;227;444;365;343;11;5;31;4;2;1
cg02693870	cg02693870	-0.0717752	0.0145379	-4.93711	7.92905e-07	0.0079473	cg02693870_BC21	80604834	CATCTCTATTATTTATAAACAAAATAACAAATCATTTAAAATTATAACCC						cg	R	B	C	2	II	16	55655412	Human	GRCh38	ATCTCTGTTATTTATGGGCAGGGTAGCAGGTCATTTGAGGTTGTGACCCG	GAAGGTGTGAATGAATGAATAATTGAAAGAATAAATAGTAGTTCTCAGCCTCACAGAACA[CG]GGTCACAACCTCAAATGACCTGCTACCCTGCCCATAAATAACAGAGATGCAGGAGTAAGT	GAAGGTGTGAATGAATGAATAATTGAAAGAATAAATAGTAGTTCTCAGCCTCACAGAACA[CG]GGTCACAACCTCAAATGACCTGCTACCCTGCCCATAAATAACAGAGATGCAGGAGTAAGT	1	TSS1500;TSS1500;TSS1500	SLC6A2;SLC6A2;SLC6A2	NM_001172504.1;NM_001043.3;NM_001172501.3	chr16:55655686-55656983	N_Shore	TSS1500;TSS1500;TSS1500;TSS1500;TSS1500;TSS1500;TSS1500;TSS1500;TSS1500	ENSG00000103546.19;ENSG00000103546.19;ENSG00000103546.19;ENSG00000103546.19;ENSG00000103546.19;ENSG00000103546.19;ENSG00000103546.19;ENSG00000103546.19;ENSG00000103546.19	ENST00000568943.6;ENST00000568529.6;ENST00000414754.7;ENST00000219833.13;ENST00000574918.2;ENST00000682050.1;ENST00000379906.6;ENST00000561820.5;ENST00000566163.5					FALSE					Quies;ReprPC;ReprPCWk;EnhBiv;EnhWk;TssBiv;EnhA2;EnhA1;TssFlnkU;TxWk;TssFlnkD	809;700;72;22;18;32;5;1;2;1;1	cg02693870
cg02696867	cg02696867	-0.0519875	0.00981617	-5.29611	1.18297e-07	0.00264647	cg02696867_BC21	10626106	TATTTTTCAAAAATATTTTACAACAACTCAAAATCCCACCACTAAATATC						cg	F	B	C	2	II	12	91361969	Human	GRCh38	ATTTTTCAAGAGTATTTTACAACAACTCAGAATCCCACCACTAGGTGTCG	TGTGAACAAAGTATTTTTCAAGAGTATTTTACAACAACTCAGAATCCCACCACTAGGTGT[CG]ATAAATATACACTATAAAAACAAGACCTGGCTTCCTAGATTCTGAATCTGCCGTTAAATT	AATTTAACGGCAGATTCAGAATCTAGGAAGCCAGGTCTTGTTTTTATAGTGTATATTTAT[CG]ACACCTAGTGGTGGGATTCTGAGTTGTTGTAAAATACTCTTGAAAAATACTTTGTTCACA	1						exon_1;TSS1500	LINC02823;ENSG00000258100.3	ENST00000657916.1;ENST00000551571.1			12:91754856-91756122	Unclassified	TRUE		EH38D2589713	EH38E1631918|CTCF-only/CTCF-bound;EH38E1631918|Low-DNase	18;69	Quies;ReprPCWk;TxWk;EnhA2;TssFlnk;EnhWk	1627;21;8;4;2;1
cg02702424	cg02702424	-0.0326413	0.00695849	-4.69086	2.7206e-06	0.0170349	cg02702424_BC21	75681195	TCAAAAATCCATACAAACTACAAATACCAATTCAAAACCTTCTAAACAAC						cg	R	B	C	2	II	3	30613379	Human	GRCh38	CAAGGATCCATGCAAACTGCAGATACCAGTTCAGGGCCTTCTGGACAGCG	TTCCAGTCTTACTCTCTTTTCATTTTTAGACCATGATTTGGTTATGTGGGAACCCACATT[CG]CTGTCCAGAAGGCCCTGAACTGGTATCTGCAGTTTGCATGGATCCTTGAAGCCATCTTCC	TTCCAGTCTTACTCTCTTTTCATTTTTAGACCATGATTTGGTTATGTGGGAACCCACATT[CG]CTGTCCAGAAGGCCCTGAACTGGTATCTGCAGTTTGCATGGATCCTTGAAGCCATCTTCC	1						TSS1500	ENSG00000163513.19	ENST00000673250.1					FALSE		EH38D3408906	EH38E2188759|dELS;EH38E2188759|dELS/CTCF-bound;EH38E2188759|DNase-only;EH38E2188759|Low-DNase	7;1;5;74	Quies;TssFlnkU;EnhWk;EnhA2;EnhA1;TxWk;TssA;EnhG1;EnhG2;TssFlnkD;EnhBiv;Het;ReprPCWk;TssFlnk	1082;64;247;48;107;81;3;4;7;14;1;2;2;1
cg02704908	cg02704908	-0.0361512	0.0079114	-4.56951	4.8887e-06	0.0243338	cg02704908_BC21	50649151	CAACACAAAAACACTATAACCAAAAACCCTATCAAAAAACCTACTAACAC						cg	F	B	C	2	II	2	144505772	Human	GRCh38	AGCACAAAAACACTGTGGCCAGAAGCCCTATCAAAGAACCTACTGACACG	TAGCAGTTTGACAGCACAAAAACACTGTGGCCAGAAGCCCTATCAAAGAACCTACTGACA[CG]TATCATTTGTGGTCTTGGTTTCACAGGGCAAGGCTACCTCACACTTATCTGCACAAGTAT	ATACTTGTGCAGATAAGTGTGAGGTAGCCTTGCCCTGTGAAACCAAGACCACAAATGATA[CG]TGTCAGTAGGTTCTTTGATAGGGCTTCTGGCCACAGTGTTTTTGTGCTGTCAAACTGCTA	1													FALSE		EH38D5242700	EH38E3375840|dELS;EH38E3375840|DNase-only;EH38E3375840|Low-DNase	8;2;77	Quies;EnhA1;EnhWk;TxWk;EnhA2;TssFlnkU;ReprPCWk;EnhBiv;ReprPC;EnhG2;TssA;EnhG1;Tx;TssFlnkD	865;407;105;105;97;18;40;7;8;5;3;1;1;1
cg02707558	cg02707558	-0.0734522	0.0167647	-4.38137	1.17937e-05	0.041624	cg02707558_BC21	82800323	TAAAAAAATTTTCCTAAACTAAACTACAAACTAACTTCCCAACAAAAAAC						cg	F	B	C	2	II	2	59025353	Human	GRCh38	GGGGGGATTTTCCTAAGCTGGACTGCAGGCTGGCTTCCCAGCAGAGGGCG	GGCAGGCTCTTTGGGGGGATTTTCCTAAGCTGGACTGCAGGCTGGCTTCCCAGCAGAGGG[CG]CACTGCCCCAGTGCCATGGCCCAGAGCAGTTTCCTCCTCTTTTGGGTGGACTTCCCTCCC	GGGAGGGAAGTCCACCCAAAAGAGGAGGAAACTGCTCTGGGCCATGGCACTGGGGCAGTG[CG]CCCTCTGCTGGGAAGCCAGCCTGCAGTCCAGCTTAGGAAAATCCCCCCAAAGAGCCTGCC	1											2:59251883-59252932	Unclassified	TRUE		EH38D5194237	EH38E3345876|CTCF-only/CTCF-bound;EH38E3345876|Low-DNase	19;68	Quies;EnhWk;ReprPCWk;EnhBiv;EnhA2;TssFlnkD;EnhA1;Het;TssFlnk;TxWk;ReprPC	1586;9;44;1;3;8;1;3;3;4;1
cg02724490	cg02724490	-0.0370932	0.007466	-4.96828	6.75481e-07	0.00730432	cg02724490_TC21	92757832	TCCATTACTAAAACTCAAATTCCCATCAATAAAATAACCTCTAAATTCAC						cg	F	T	C	2	II	8	10630721	Human	GRCh38	CGTGAATTTAGAGGTCACTTTACTGATGGGAACCTGAGTCCCAGCAATGG	GCAAATTGCCCTCCATTGCTGGGACTCAGGTTCCCATCAGTAAAGTGACCTCTAAATTCA[CG]TCTTGCACAAAGAAGTGAATTTTTTCATTTTAAAAAGCTCTCCAGGTGATTCTCAGCCAG	GCAAATTGCCCTCCATTGCTGGGACTCAGGTTCCCATCAGTAAAGTGACCTCTAAATTCA[CG]TCTTGCACAAAGAAGTGAATTTTTTCATTTTAAAAAGCTCTCCAGGTGATTCTCAGCCAG	1											8:10487569-10488477	Promoter_Associated	TRUE		EH38D5925321	EH38E3817307|dELS;EH38E3817307|DNase-H3K4me3;EH38E3817307|DNase-only;EH38E3817307|Low-DNase	3;1;3;80	Quies;EnhWk;ReprPC;TssFlnkD;TxWk;ReprPCWk;EnhA1;TssFlnk;EnhA2;TssFlnkU;TssA;TssBiv	761;241;3;99;309;84;58;29;27;48;3;1	cg02724490
cg02726018	cg02726018	-0.041352	0.00801108	-5.16186	2.44513e-07	0.00411305	cg02726018_BC21	88710527	CTCCCCCTACTAAATACTCTTAAAAAACAACTTTAAAAAAAACATTTCAC						cg	F	B	C	2	II	3	122993870	Human	GRCh38	TCCCCCTGCTGAATACTCTTGGGGAACAACTTTGGAAGAAGCATTTCACG	TCAGCAGTCAGCTCCCCCTGCTGAATACTCTTGGGGAACAACTTTGGAAGAAGCATTTCA[CG]AAATAGTCAGCGGCATCGCCCCTCCTTTTCCCAGCCCAGGTCCTTTCATGCTCCCATTTT	AAAATGGGAGCATGAAAGGACCTGGGCTGGGAAAAGGAGGGGCGATGCCGCTGACTATTT[CG]TGAAATGCTTCTTCCAAAGTTGTTCCCCAAGAGTATTCAGCAGGGGGAGCTGACTGCTGA	1	TSS1500	SEMA5B	NM_001256346.2			TSS1500;TSS1500;TSS1500	ENSG00000082684.16;ENSG00000082684.16;ENSG00000082684.16	ENST00000616742.4;ENST00000650207.1;ENST00000393583.6					FALSE		EH38D5485979	EH38E3534914|CTCF-only/CTCF-bound;EH38E3534914|DNase-H3K4me3/CTCF-bound;EH38E3534914|Low-DNase	1;1;85	Quies;EnhWk;TxWk;ReprPC;ReprPCWk;EnhBiv;EnhA1;EnhA2;TssFlnkD;EnhG2;EnhG1	791;80;171;373;166;60;9;7;4;1;1	cg02726018
cg02734358	cg02734358	-0.0707281	0.0142845	-4.95138	7.3688e-07	0.00761915	cg02734358_TC21	61712326	TACTTCCCATATAAAACTAATACACTTATAATTTTATCCTAATCATTTTC						cg	F	T	C	2	II	4	89305923	Human	GRCh38	CGAAAATGATTAGGACAAAATCACAAGTGCATCAGCTTCACATGGGAAGT	CCTCAGTCCTCTACTTCCCATGTGAAGCTGATGCACTTGTGATTTTGTCCTAATCATTTT[CG]TAGAAGTCTAGTTAGTGATTAGGTGAAGGCTCACCACACCACAACACACTGTACATGGCT	CCTCAGTCCTCTACTTCCCATGTGAAGCTGATGCACTTGTGATTTTGTCCTAATCATTTT[CG]TAGAAGTCTAGTTAGTGATTAGGTGAAGGCTCACCACACCACAACACACTGTACATGGCT	1				chr4:89307563-89307839	N_Shore				chr4:89305572-89305960				FALSE		EH38D5579036	EH38E3594591|DNase-H3K4me3;EH38E3594591|DNase-only;EH38E3594591|Low-DNase;EH38E3594591|pELS	1;1;80;5	Quies;ReprPCWk;TssFlnkU;TssFlnk;TxWk;EnhA2;TssA;EnhWk;TssFlnkD;EnhA1;ReprPC;TssBiv;Tx;EnhBiv	697;147;133;152;226;52;128;38;27;9;37;10;4;3	cg02734358
cg02743036	cg02743036	-0.0490053	0.0111673	-4.38827	1.14256e-05	0.0407501	cg02743036_TC21	71722117	AATTAATTCAACTACTCTTCAAAATCTCTCAATTATTCCCAAATTCTCTC						cg	F	T	C	2	II	13	24680054	Human	GRCh38	CGAGAGAATTTGGGAATAACTGAGAGACTCTGAAGAGTAGCTGAATTAAT	TGGATCCGGCAAATTAATTCAGCTACTCTTCAGAGTCTCTCAGTTATTCCCAAATTCTCT[CG]GAAGCTTGAATTTACCTATCTAAATCCATTCTCAAAAACACATTGGCCTTTTCTAGCCGG	TGGATCCGGCAAATTAATTCAGCTACTCTTCAGAGTCTCTCAGTTATTCCCAAATTCTCT[CG]GAAGCTTGAATTTACCTATCTAAATCCATTCTCAAAAACACATTGGCCTTTTCTAGCCGG	1	TSS1500;TSS1500	ATP12A;ATP12A	NM_001676.7;NM_001185085.2	chr13:24680255-24680955	N_Shore	TSS1500;TSS1500	ENSG00000075673.12;ENSG00000075673.12	ENST00000381946.5;ENST00000218548.10			13:25253798-25255422	Unclassified_Cell_type_specific	TRUE					Quies;ReprPCWk;ReprPC;TssBiv;EnhBiv;EnhWk;TssFlnk;TxWk;TssFlnkD;TssFlnkU;EnhA2	803;75;561;60;123;17;2;18;2;1;1
cg02753354	cg02753354	-0.0160346	0.00362752	-4.42027	9.85761e-06	0.0373371	cg02753354_BC21	10772559	CATAATACAAACRATAAACACCTTACAAACCCAAACCTTCATACAAATAC						cg	F	B	C	2	II	19	1074728	Human	GRCh38	ATGGTGCAGGCGGTGGGCACCTTGCAGACCCAGACCTTCATGCAGGTGCG	TTCGGCCACAGCATGGTGCAGGCGGTGGGCACCTTGCAGACCCAGACCTTCATGCAGGTG[CG]TGGTGCCCGGGAGGGCGGGCTGGGCGGGGGTGTCACCGGGGTACCCACTCACGGCCCGTC	GACGGGCCGTGAGTGGGTACCCCGGTGACACCCCCGCCCAGCCCGCCCTCCCGGGCACCA[CG]CACCTGCATGAAGGTCTGGGTCTGCAAGGTGCCCACCGCCTGCACCATGCTGTGGCCGAA	1				chr19:1070986-1071813;chr19:1074727-1075072	S_Shelf;Island						19:1074369-1075290	Promoter_Associated	TRUE		EH38D5096275	EH38E3280267|dELS;EH38E3280267|DNase-H3K4me3;EH38E3280267|DNase-only;EH38E3280267|Low-DNase	24;13;26;24	EnhWk;ReprPCWk;TxWk;EnhA2;TssA;TssFlnkU;EnhG2;TssFlnkD;Quies;EnhA1;TssFlnk;EnhG1;Tx;TssBiv;ReprPC	82;683;100;68;94;247;104;40;66;44;102;10;16;2;5	cg02753354
cg02762573	cg02762573	-0.0402202	0.00931837	-4.31623	1.58716e-05	0.0495203	cg02762573_TC21	18758217	TTTCCAATAACTTATTCCTCATTTCTATATAAATCCTCACCAAAATAACC						cg	F	T	C	2	II	17	58707240	Human	GRCh38	CGGCTATTCTGGTGAGGATTTATACAGAAATGAGGAACAAGTTACTGGAA	CTTTCCTTCAGTTTCCAGTAACTTGTTCCTCATTTCTGTATAAATCCTCACCAGAATAGC[CG]GGCATGGTGGCTCACACCTGTAATCCCAGCACTTTGGGAGGCTGAGGTGGGCGGATTGCC	CTTTCCTTCAGTTTCCAGTAACTTGTTCCTCATTTCTGTATAAATCCTCACCAGAATAGC[CG]GGCATGGTGGCTCACACCTGTAATCCCAGCACTTTGGGAGGCTGAGGTGGGCGGATTGCC	1													FALSE					Quies;TxWk;Tx;EnhA2;EnhG1;EnhWk;EnhA1	929;668;47;10;5;3;1
cg02769599	cg02769599	-0.0440089	0.00984873	-4.46849	7.87745e-06	0.0326269	cg02769599_TC21	91600308	AAAAATAACTCCTCTATAACTCCTAATTCTAAATAACCCATACAACATAC						cg	F	T	C	2	II	15	27258433	Human	GRCh38	CGCATGCTGCATGGGTCACTCAGAACCAGGAGTTACAGAGGAGCCATTTC	TTCGCAGCCTGAGAAATGGCTCCTCTGTAACTCCTGGTTCTGAGTGACCCATGCAGCATG[CG]GGACCATTTTCCAGAGTCTCTGCACCCTCTGCATAGCTGAGTGTGAGCCGTGGGGCACAC	TTCGCAGCCTGAGAAATGGCTCCTCTGTAACTCCTGGTTCTGAGTGACCCATGCAGCATG[CG]GGACCATTTTCCAGAGTCTCTGCACCCTCTGCATAGCTGAGTGTGAGCCGTGGGGCACAC	1													FALSE		EH38D2769868	EH38E1749218|CTCF-only/CTCF-bound;EH38E1749218|Low-DNase	4;83	Quies;ReprPCWk;Het;TxWk;ZNF/Rpts;EnhWk;TssFlnkD;EnhA1	1394;28;207;5;6;16;5;2	cg02769599
cg02769865	cg02769865	-0.0150971	0.00312284	-4.83441	1.33543e-06	0.0107761	cg02769865_TC11	75791228	AATATAACCCAAAACTAAAATATAAAATAAAATTCAAAACTCTAAACACA	27704433	AATATAACCCGAAACTAAAATATAAAATAAAATTCGAAACTCTAAACACG	A	Red	R	cg	R	T	C	1	I	1	9729924	Human	GRCh38	CGTGCTCAGAGCTCCGAACTTCACTTTACATTCCAGTCCCGGGTTACACT	CTGGGCGGGGTGGGCCTCTCCCTCTGGGGTCTGGGGAGGGAGGACCCGGCGGGAAGAGCC[CG]TGCTCAGAGCTCCGAACTTCACTTTACATTCCAGTCCCGGGTTACACTAGCACAAAGGAC	GTCCTTTGTGCTAGTGTAACCCGGGACTGGAATGTAAAGTGAAGTTCGGAGCTCTGAGCA[CG]GGCTCTTCCCGCCGGGTCCTCCCTCCCCAGACCCCAGAGGGAGAGGCCCACCCCGCCCAG	1	3UTR;exon_19;3UTR;exon_18;3UTR;exon_18	CLSTN1;CLSTN1;CLSTN1;CLSTN1;CLSTN1;CLSTN1	NM_001009566.3;NM_001009566.3;NM_001302883.1;NM_001302883.1;NM_014944.4;NM_014944.4	chr1:9730234-9730646;chr1:9731100-9731428	N_Shore;N_Shore	exon_19;exon_19;exon_4;exon_14;exon_18;3UTR;3UTR;5UTR;5UTR	CLSTN1;CLSTN1;CLSTN1;CLSTN1;CLSTN1;CLSTN1;CLSTN1;CLSTN1;CLSTN1	ENST00000377298.9;ENST00000650348.1;ENST00000477264.1;ENST00000435891.5;ENST00000361311.4;ENST00000361311.4;ENST00000377298.9;ENST00000650348.1;ENST00000435891.5			1:9789886-9790175	Promoter_Associated_Cell_type_specific	TRUE		EH38D4340367	EH38E2784954|Low-DNase	87	Quies;ReprPCWk;TxWk;Tx;EnhWk;EnhG1;EnhA2;EnhG2;EnhA1;ReprPC	614;78;143;598;61;125;5;32;5;2	cg02769865
cg02770479	cg02770479	-0.0579705	0.0109838	-5.27782	1.30732e-07	0.00278389	cg02770479_BC21	47764947	AAACCTAACATTTCTTTATAAATATCACACTAACTCATCCAATATCACAC						cg	R	B	C	2	II	22	32344162	Human	GRCh38	AACCTGACATTTCTTTGTGGATATCACACTGACTCATCCAATGTCACACG	AAAGAAAACAGGATGAGAAGGCTAGTTTTCAATAGGAAGAAAAGACATCGCTGGGTTCAA[CG]TGTGACATTGGATGAGTCAGTGTGATATCCACAAAGAAATGTCAGGTTTAAAGGTCAAAA	AAAGAAAACAGGATGAGAAGGCTAGTTTTCAATAGGAAGAAAAGACATCGCTGGGTTCAA[CG]TGTGACATTGGATGAGTCAGTGTGATATCCACAAAGAAATGTCAGGTTTAAAGGTCAAAA	1						TSS1500;TSS1500	ENSG00000234626.2;ENSG00000234626.2	ENST00000667569.1;ENST00000446543.1					FALSE		EH38D5395848			Tx;EnhG1;Quies;TxWk;ReprPC;ReprPCWk;TssFlnk;EnhA2;EnhWk;EnhG2	165;45;588;583;39;204;5;20;13;1
cg02771362	cg02771362	-0.0274838	0.00583051	-4.71379	2.43153e-06	0.0158143	cg02771362_TC21	37713110	ATCATCCTAAACATCTACAAAAAATATCAACAACTACTAAAACTAAAAAC						cg	F	T	C	2	II	9	127779580	Human	GRCh38	CGCCCCCAGCCCCAGCAGCTGCTGACACCCTTTGCAGATGTCCAGGATGA	CCCCTCCACGGGTCATCCTGGACATCTGCAAAGGGTGTCAGCAGCTGCTGGGGCTGGGGG[CG]GGGCCCAAGACCCAGGGCTGCCAATCCCAGCTACTTCCACCTCCCAAGCCTCAGTCACCT	CCCCTCCACGGGTCATCCTGGACATCTGCAAAGGGTGTCAGCAGCTGCTGGGGCTGGGGG[CG]GGGCCCAAGACCCAGGGCTGCCAATCCCAGCTACTTCCACCTCCCAAGCCTCAGTCACCT	1	TSS1500	SH2D3C	NM_170600.3			TSS1500;TSS1500	ENSG00000095370.20;ENSG00000095370.20	ENST00000314830.13;ENST00000468969.6			9:130541691-130541972	Promoter_Associated	TRUE		EH38D6068323	EH38E3910224|DNase-only;EH38E3910224|Low-DNase;EH38E3910224|pELS	2;69;16	Quies;TxWk;TssFlnkU;EnhA1;EnhA2;Tx;ReprPCWk;EnhWk;TssA;EnhG2;ReprPC;EnhBiv;TssFlnkD;TssFlnk	602;572;100;107;87;23;64;95;4;3;2;2;1;1	cg02771362
cg02793162	cg02793162	-0.0542424	0.0106078	-5.11344	3.16338e-07	0.0047607	cg02793162_TC21	57682487	ACCAAATTTTATATCCRCTACCCAAAATATTCCCAAAAAATTATCTATTC						cg	R	T	C	2	II	15	68666195	Human	GRCh38	CGAACAGATAATTCTTTGGGAACATTCTGGGTAGCGGACATAAAACCTGG	AACAGCTTGCTGTACTTCTCAAAGCTGAGTGTCCTATTTGTTTGAGGTAGAGAAGAGGCT[CG]AACAGATAATTCTTTGGGAACATTCTGGGTAGCGGACATAAAACCTGGCACATGGCAAGT	ACTTGCCATGTGCCAGGTTTTATGTCCGCTACCCAGAATGTTCCCAAAGAATTATCTGTT[CG]AGCCTCTTCTCTACCTCAAACAAATAGGACACTCAGCTTTGAGAAGTACAGCAAGCTGTT	1													FALSE					Quies;ReprPCWk;EnhWk;TxWk;Tx;EnhA1;Het;EnhA2;ReprPC;TssFlnkD;EnhG1	1414;72;57;74;5;23;3;12;1;1;1	cg02793162
cg02797271	cg02797271	-0.0365701	0.00752367	-4.86068	1.16986e-06	0.00995814	cg02797271_BC21	4662242	CRAACAAAAACTCCTAAAAAAACACAACCTCTAAAAAATCACCCTACTCC						cg	R	B	C	2	II	14	105065822	Human	GRCh38	GGACAGGGACTCCTGGGAGGACACAGCCTCTGGGAAGTCACCCTGCTCCG	CAAAATCCAGCTCCTCTGCAGCTCAGGCCTGGTGTTGCCCACTCTCGGGCCAGGCAAGCA[CG]GAGCAGGGTGACTTCCCAGAGGCTGTGTCCTCCCAGGAGTCCCTGTCCGGGGTGCCAGGA	CAAAATCCAGCTCCTCTGCAGCTCAGGCCTGGTGTTGCCCACTCTCGGGCCAGGCAAGCA[CG]GAGCAGGGTGACTTCCCAGAGGCTGTGTCCTCCCAGGAGTCCCTGTCCGGGGTGCCAGGA	1	TSS1500;TSS1500;TSS1500;TSS1500	GPR132;GPR132;GPR132;GPR132	NM_001278694.2;NM_013345.4;NM_001278695.2;NM_001278696.2			TSS1500;TSS1500;TSS1500;TSS1500	ENSG00000183484.12;ENSG00000183484.12;ENSG00000183484.12;ENSG00000183484.12	ENST00000329797.8;ENST00000392585.2;ENST00000539291.6;ENST00000546679.1			14:105531503-105533362	Promoter_Associated	TRUE		EH38D2765351	EH38E1746434|DNase-H3K4me3;EH38E1746434|DNase-only;EH38E1746434|Low-DNase;EH38E1746434|pELS;EH38E1746434|pELS/CTCF-bound	1;1;73;11;1	Quies;ReprPCWk;TssFlnkU;EnhA2;EnhA1;EnhWk;ReprPC;TxWk;TssA;TssFlnk;TssFlnkD;Het;EnhBiv;TssBiv;EnhG1;ZNF/Rpts	423;436;186;124;68;81;130;85;79;28;5;2;13;1;1;1	cg02797271
cg02797329	cg02797329	-0.0328262	0.00729745	-4.49831	6.84958e-06	0.0300637	cg02797329_BC21	5640194	AATCCTCTACTTATTTTTTTCTTCATATCTTCCAATAAATATTCCTTCTC						cg	R	B	C	2	II	3	192289447	Human	GRCh38	ATCCTCTACTTATTTTTTTCTTCATATCTTCCAGTGAGTGTTCCTTCTCG	TGATTTGGAGCAACAGGATAGCGTCTCAGCTTTTGTGCCAAAAGGAAGGTAAGAATAAAA[CG]AGAAGGAACACTCACTGGAAGATATGAAGAAAAAAATAAGTAGAGGATTCAAATGCGAAA	TGATTTGGAGCAACAGGATAGCGTCTCAGCTTTTGTGCCAAAAGGAAGGTAAGAATAAAA[CG]AGAAGGAACACTCACTGGAAGATATGAAGAAAAAAATAAGTAGAGGATTCAAATGCGAAA	1													FALSE					TssFlnkU;Quies;TssA;TssFlnk;EnhA2;ReprPCWk;EnhWk;TssBiv;ReprPC;TssFlnkD;EnhA1;EnhBiv;Het;TxWk	26;1199;64;141;25;74;23;28;44;13;4;10;8;4
cg02802514	cg02802514	-0.040363	0.00775542	-5.20448	1.94536e-07	0.00349956	cg02802514_BC21	86610141	TAAAACAAAATCATAACTATCAACCTCAAAATAACRATCTCTAAACCTAC						cg	F	B	C	2	II	6	33205357	Human	GRCh38	GGGACAAAGTCATAGCTGTCAACCTCAAGGTGGCGATCTCTGAACCTGCG	CTGAGGATGACTGGGACAAAGTCATAGCTGTCAACCTCAAGGTGGCGATCTCTGAACCTG[CG]ACGTTTGGCCCCCTTAGCCTGGGGAGGGAGTTGGAGGAGGGCTGTCACCCCAGCTGATCT	AGATCAGCTGGGGTGACAGCCCTCCTCCAACTCCCTCCCCAGGCTAAGGGGGCCAAACGT[CG]CAGGTTCAGAGATCGCCACCTTGAGGTTGACAGCTATGACTTTGTCCCAGTCATCCTCAG	1				chr6:33204512-33205046;chr6:33207784-33208575	S_Shore;N_Shelf						6:33171945-33173651	Promoter_Associated	TRUE		EH38D5745143	EH38E3701874|DNase-H3K4me3/CTCF-bound;EH38E3701874|Low-DNase;EH38E3701874|pELS;EH38E3701874|pELS/CTCF-bound	2;71;1;13	ReprPCWk;ReprPC;TssFlnkD;Quies;TssFlnkU;TxWk;EnhWk;TssA;EnhA2;TssFlnk;EnhA1;TssBiv;EnhBiv	579;58;141;195;544;11;34;22;6;18;36;18;1	cg02802514
cg02823803	cg02823803	-0.0396562	0.00806904	-4.91461	8.89594e-07	0.00852875	cg02823803_BC21	11697978	CTATTCTTACACAATCTAATCTCRCATACATAATAATTCTTCTCTCTCTC						cg	R	B	C	2	II	19	56508589	Human	GRCh38	TGTTCTTGCACAGTCTAGTCTCGCATACATGGTGATTCTTCTCTCTCTCG	CCTGTGTGTGAAAGGCCGGTCGGTCGGTGGGTGAGGCTCAATGAGAGGCCGGTGTGTGTT[CG]AGAGAGAGAAGAATCACCATGTATGCGAGACTAGACTGTGCAAGAACAGAGTGTGAGACT	CCTGTGTGTGAAAGGCCGGTCGGTCGGTGGGTGAGGCTCAATGAGAGGCCGGTGTGTGTT[CG]AGAGAGAGAAGAATCACCATGTATGCGAGACTAGACTGTGCAAGAACAGAGTGTGAGACT	1				chr19:56507374-56508137	S_Shore								FALSE	DMR	EH38D5152028	EH38E3318227|Low-DNase;EH38E3318227|pELS	85;2	Het;ReprPCWk;TssFlnkU;TssFlnk;Quies;TssFlnkD;TssBiv;ZNF/Rpts;TssA;EnhA2;EnhWk;TxWk	586;20;429;100;242;93;45;81;61;1;4;1	cg02823803
cg02839514	cg02839514	0.0784572	0.0166399	4.715	2.41705e-06	0.0157863	cg02839514_BC21	60605991	TACAAAAAACTTTAAACCATCCTAATAAATTATCACAAATTTTTTTTTCC						cg	F	B	C	2	II	12	22472527	Human	GRCh38	GCAGGAGACTTTAAACCATCCTAATAAATTATCACAGGTTTTTTTTTCCG	AAAACTATACCTGCAGGAGACTTTAAACCATCCTAATAAATTATCACAGGTTTTTTTTTC[CG]TGTATAAATATAAAAGGACTAAAAATCACTTCCACCTAAGTTCTAACATAAGTATTTTTA	TAAAAATACTTATGTTAGAACTTAGGTGGAAGTGATTTTTAGTCCTTTTATATTTATACA[CG]GAAAAAAAAACCTGTGATAATTTATTAGGATGGTTTAAAGTCTCCTGCAGGTATAGTTTT	1						TSS1500;TSS200	ENSG00000111731.13;ENSG00000111731.13	ENST00000539615.1;ENST00000540245.5					FALSE					Quies;ReprPCWk;TxWk;Tx;Het;EnhWk;ReprPC;EnhA2	1024;34;560;38;2;3;1;1
cg02853393	cg02853393	-0.0269296	0.00556988	-4.83486	1.3324e-06	0.0107646	cg02853393_TC21	60736188	TAAACAAAAACTAAACCAATAAAAAACTTCAAACCATCTCTTAAACACCC						cg	R	T	C	2	II	1	224747770	Human	GRCh38	CGGGTGTCTAAGAGATGGTCTGAAGTCCTTCATTGGCTCAGCTCTTGTCC	CTTATGGCCAGGGGAGCAGCAGTTGGGGAGTGACACACAGGAAACCCGCCCACAGTGCCC[CG]GGTGTCTAAGAGATGGTCTGAAGTCCTTCATTGGCTCAGCTCTTGTCCAATGTTTCTGGC	GCCAGAAACATTGGACAAGAGCTGAGCCAATGAAGGACTTCAGACCATCTCTTAGACACC[CG]GGGCACTGTGGGCGGGTTTCCTGTGTGTCACTCCCCAACTGCTGCTCCCCTGGCCATAAG	1											1:224935400-224935612	Unclassified_Cell_type_specific	TRUE		EH38D4466527	EH38E2869096|dELS;EH38E2869096|DNase-only;EH38E2869096|Low-DNase	2;7;78	Het;ReprPCWk;Quies;TxWk;EnhWk;EnhA2;EnhA1;ZNF/Rpts;ReprPC	158;59;1278;39;109;6;11;1;2
cg02886079	cg02886079	-0.031545	0.00660225	-4.77791	1.77123e-06	0.0128974	cg02886079_BC21	79749934	CCTAACCTACCTAACCCRTAAAAATCTACACCAACAAATCRATAACCAAC						cg	F	B	C	2	II	19	14081936	Human	GRCh38	CTGGCCTGCCTGGCCCGTGAGGATCTGCACCAGCAGGTCGGTGGCCAGCG	CGGAGGCCGGGCCTGGCCTGCCTGGCCCGTGAGGATCTGCACCAGCAGGTCGGTGGCCAG[CG]TGGGCGTGGGCTCCTCGAAGCCGATGGTCAGCAGCTGCTGGTAGTCCCCAAGCGGCTGCG	CGCAGCCGCTTGGGGACTACCAGCAGCTGCTGACCATCGGCTTCGAGGAGCCCACGCCCA[CG]CTGGCCACCGACCTGCTGGTGCAGATCCTCACGGGCCAGGCAGGCCAGGCCCGGCCTCCG	1	exon_6	C19orf67	NM_001277378.2_2	chr19:14081175-14081960;chr19:14085432-14085894	Island;N_Shelf	exon_6;exon_6	C19orf67;C19orf67	ENST00000548523.6;ENST00000343945.5			19:14191729-14193259	Promoter_Associated	TRUE		EH38D5112935	EH38E3292407|dELS;EH38E3292407|dELS/CTCF-bound;EH38E3292407|DNase-H3K4me3;EH38E3292407|Low-DNase	51;2;3;31	TxWk;TssA;TssFlnkU;Tx;EnhA1;Quies;TssFlnk;TssFlnkD	728;432;373;80;1;22;19;8	cg02886079
cg02892589	cg02892589	-0.0161	0.00344279	-4.67642	2.9192e-06	0.0177626	cg02892589_TC21	34607870	RCRCACACRTCRAAAAATTAACCAAAAAAAACCATTATATATTTCTAAAC						cg	F	T	C	2	II	X	41333276	Human	GRCh38	CGCCTAGAAACACACAATGGCCCCTCCTGGCCAACCCCCCGACGTGTGCG	CGGAGGCGCGCGCGCACACGTCGGGGGGTTGGCCAGGAGGGGCCATTGTGTGTTTCTAGG[CG]GCGCCCCCGCTGCCTAGGCAACCGCGCAGGAAGGTGTCCGGCCACCTGCGCGCGCCGCCG	CGGAGGCGCGCGCGCACACGTCGGGGGGTTGGCCAGGAGGGGCCATTGTGTGTTTCTAGG[CG]GCGCCCCCGCTGCCTAGGCAACCGCGCAGGAAGGTGTCCGGCCACCTGCGCGCGCCGCCG	1	TSS1500;TSS1500;TSS1500;TSS1500;TSS1500;TSS200	DDX3X;DDX3X;DDX3X;DDX3X;DDX3X;DDX3X	NM_001363819.1;NM_001356.5;NM_001193417.3;NM_001193416.3;NR_126094.2;NR_126093.1	chrX:41332721-41335025	Island	TSS200;TSS200;TSS200;TSS200;TSS200;TSS200;TSS200;TSS200;TSS200;TSS200;TSS1500;TSS1500;TSS1500;TSS1500;TSS1500;TSS1500;TSS1500;TSS1500;TSS1500;TSS1500;TSS1500;TSS1500;TSS1500;TSS1500;TSS1500;TSS1500;TSS1500;TSS1500;TSS1500;TSS1500;TSS1500;TSS1500;TSS1500;TSS1500;TSS1500;TSS1500;TSS1500;TSS1500;TSS1500;TSS1500;TSS1500;TSS1500;TSS1500;TSS1500;TSS1500;TSS1500;TSS1500;TSS1500;TSS1500	ENSG00000215301.11;ENSG00000215301.11;ENSG00000215301.11;ENSG00000215301.11;ENSG00000215301.11;ENSG00000215301.11;ENSG00000215301.11;ENSG00000215301.11;ENSG00000215301.11;ENSG00000215301.11;ENSG00000215301.11;ENSG00000215301.11;ENSG00000215301.11;ENSG00000215301.11;ENSG00000215301.11;ENSG00000215301.11;ENSG00000215301.11;ENSG00000215301.11;ENSG00000215301.11;ENSG00000215301.11;ENSG00000215301.11;…	ENST00000610559.5;ENST00000629496.3;ENST00000625837.2;ENST00000626301.2;ENST00000629785.2;ENST00000630255.2;ENST00000630370.2;ENST00000630858.2;ENST00000611546.2;ENST00000478993.5;ENST00000457138.7;ENST00000643821.1;ENST00000480592.6;ENST00000647219.1;ENST00000615742.4;ENST00000631641.2;ENST00000646822.1;ENST00000441189.4;ENST00000645589.1;ENST00000644513.1;ENST00000642597.1;ENST00000642722.1;ENS…			X:41192282-41193494	Promoter_Associated	TRUE		EH38D6103527	EH38E3931742|Low-DNase;EH38E3931742|PLS;EH38E3931742|PLS/CTCF-bound	7;75;5	Quies;ReprPCWk;TssA;EnhA1;TssFlnk;Het;TxWk;EnhA2;TssFlnkU;EnhWk;ZNF/Rpts;ReprPC;EnhG2;TssBiv	644;73;804;4;15;57;28;17;4;4;9;2;1;1	cg02892589
cg02918253	cg02918253	-0.0531443	0.0115616	-4.59661	4.29412e-06	0.0226593	cg02918253_TC11	15631104	TATCCTTAAAAAAAAACTTAATTTCAAAATATCCATCAACTATTACAACA	10746208	TATCCTTAAAAAAAAACTTAATTTCAAAATATCCATCAACTATTACGACG	A	Red	R	cg	R	T	C	1	I	19	19213187	Human	GRCh38	CGTCGCAATAGCTGATGGACATTCTGAAATCAAGTTCCCCCTCAAGGATA	GGACGTGGGGGCAGGGCAGGCAGGAAGGGGTGGGTGCACTGTGGGACCCCAGAACCCAGC[CG]TCGCAATAGCTGATGGACATTCTGAAATCAAGTTCCCCCTCAAGGATATGGGGGTTTTGT	ACAAAACCCCCATATCCTTGAGGGGGAACTTGATTTCAGAATGTCCATCAGCTATTGCGA[CG]GCTGGGTTCTGGGGTCCCACAGTGCACCCACCCCTTCCTGCCTGCCCTGCCCCCACGTCC	1				chr19:19211866-19212107	S_Shore						19:19323922-19324114	Unclassified_Cell_type_specific	TRUE		EH38D5119572	EH38E3297061|Low-DNase	87	Quies;TxWk;ReprPC;TssFlnkU;TssFlnk;TssBiv;ReprPCWk;EnhA2;TssA;Tx;Het;EnhBiv;EnhWk;TssFlnkD;ZNF/Rpts	466;358;698;6;5;46;43;7;6;12;6;5;3;1;1	cg02918253
cg02926820	cg02926820	-0.0494935	0.0113184	-4.37285	1.22637e-05	0.0426154	cg02926820_BC21	40605444	ACAAACTTCATACTTATCTACTTACAAAAAACRTAAAACAAAACAAAAAC						cg	R	B	C	2	II	17	80501891	Human	GRCh38	CAGGCTTCATGCTTGTCTGCTTGCAGGAGACGTGAAACAGAGCAGAGGCG	CCTCTCCTGCTCGGAATCCCCCGCTGCCCTCCCCCAGGCCCTGGTCTCTGATTTCAGACT[CG]CCTCTGCTCTGTTTCACGTCTCCTGCAAGCAGACAAGCATGAAGCCTGCCCTCCGAGGCT	CCTCTCCTGCTCGGAATCCCCCGCTGCCCTCCCCCAGGCCCTGGTCTCTGATTTCAGACT[CG]CCTCTGCTCTGTTTCACGTCTCCTGCAAGCAGACAAGCATGAAGCCTGCCCTCCGAGGCT	1													FALSE		EH38D2969566	EH38E1891122|dELS;EH38E1891122|DNase-only;EH38E1891122|Low-DNase	6;1;80	Quies;TxWk;EnhA2;ReprPCWk;ReprPC;EnhA1;EnhWk;TssA;TssFlnkU;EnhBiv;TssFlnk;TssBiv;EnhG1;Het;TssFlnkD	458;371;130;286;190;80;71;8;34;25;4;1;2;2;1	cg02926820
cg02931464	cg02931464	-0.0295553	0.0054687	-5.40445	6.50069e-08	0.0017943	cg02931464_BC21	13760180	TCCCCACTTCTAATTTACTCTCTATCCTAAAAACAAAAACCTCTTTACAC						cg	R	B	C	2	II	12	121388500	Human	GRCh38	CCCCACTTCTGGTTTGCTCTCTATCCTGAGGACAAAAGCCTCTTTACACG	AGCCGCCTTGCCCCACCATCCCAAAGGAATTTAAACAGGAAAAGACAAAGTCAGACTTTT[CG]TGTAAAGAGGCTTTTGTCCTCAGGATAGAGAGCAAACCAGAAGTGGGGATGACTAAGCAG	AGCCGCCTTGCCCCACCATCCCAAAGGAATTTAAACAGGAAAAGACAAAGTCAGACTTTT[CG]TGTAAAGAGGCTTTTGTCCTCAGGATAGAGAGCAAACCAGAAGTGGGGATGACTAAGCAG	1													FALSE		EH38D2616273	EH38E1650662|dELS;EH38E1650662|DNase-only;EH38E1650662|Low-DNase	5;5;77	Quies;TxWk;EnhWk;ReprPCWk;EnhA2;ZNF/Rpts;ReprPC;Het;EnhA1	1462;9;84;48;4;3;1;30;22	cg02931464
cg02932021	cg02932021	-0.080442	0.0156135	-5.1521	2.57589e-07	0.00422784	cg02932021_BC21	13706364	TACTATAACTAATATTAATTAAACACCTACTAAATACCAAACACTATTCC						cg	R	B	C	2	II	16	19412706	Human	GRCh38	ACTGTAGCTAATGTTGATTGAGCACCTACTAAGTGCCAGGCACTGTTCCG	GCGTGAGCCACCGCACCCAGCCCGAGCCCACCCTTTTGTGGGGATTAAAGATGAAACACT[CG]GAACAGTGCCTGGCACTTAGTAGGTGCTCAATCAACATTAGCTACAGTAAATGCTGTGAC	GCGTGAGCCACCGCACCCAGCCCGAGCCCACCCTTTTGTGGGGATTAAAGATGAAACACT[CG]GAACAGTGCCTGGCACTTAGTAGGTGCTCAATCAACATTAGCTACAGTAAATGCTGTGAC	1				chr16:19410494-19411176	S_Shore	TSS1500	ENSG00000260681.1	ENST00000568635.1					FALSE		EH38D4931390			ZNF/Rpts;Het;ReprPCWk;Quies;ReprPC;TxWk;EnhA2;EnhWk	539;186;598;103;173;36;19;9
cg02934347	cg02934347	-0.0373316	0.00607312	-6.14702	7.89525e-10	0.000138076	cg02934347_BC21	55701492	TCTTTACAATACTACCTCATACACTAAATCCATTTCTCRCATAACCTAAC						cg	F	B	C	2	II	6	17393397	Human	GRCh38	CTTTGCAATACTGCCTCATGCACTGAATCCATTTCTCGCATAGCCTGGCG	CTTTCCAGACTTCTTTGCAATACTGCCTCATGCACTGAATCCATTTCTCGCATAGCCTGG[CG]CTTGGCAGGCAGGCTGGCGTTCCCTGGCTCTGCCTTCCCCATCTCCCTGTCTTTTCTCCC	GGGAGAAAAGACAGGGAGATGGGGAAGGCAGAGCCAGGGAACGCCAGCCTGCCTGCCAAG[CG]CCAGGCTATGCGAGAAATGGATTCAGTGCATGAGGCAGTATTGCAAAGAAGTCTGGAAAG	1	TSS200;TSS200;TSS200	CAP2;CAP2;CAP2	NM_001363534.2;NM_001363533.2;NM_006366.3			TSS200;TSS1500;TSS1500;TSS1500;TSS1500;TSS1500;TSS1500	ENSG00000112186.13;ENSG00000112186.13;ENSG00000112186.13;ENSG00000112186.13;ENSG00000112186.13;ENSG00000112186.13;ENSG00000112186.13	ENST00000229922.7;ENST00000489374.5;ENST00000378990.6;ENST00000493172.5;ENST00000479291.5;ENST00000465994.5;ENST00000476263.1					FALSE		EH38D5734411	EH38E3694217|Low-DNase;EH38E3694217|PLS;EH38E3694217|PLS/CTCF-bound	53;33;1	TssA;ReprPCWk;TssFlnk;ReprPC;Quies;TssBiv;TssFlnkU;TssFlnkD;EnhWk;EnhA2;EnhBiv;TxWk;EnhA1	691;18;245;156;120;124;159;54;22;26;35;8;5	cg02934347
cg02947519	cg02947519	-0.0584917	0.0130728	-4.47429	7.66646e-06	0.0321197	cg02947519_TC21	93607247	ACAACAACAATATCATAACCAAATATAACCTTAATTACTATCATTCTAAC						cg	F	T	C	2	II	1	85153744	Human	GRCh38	CGTCAGAATGACAGCAATCAAGGCCATACCTGGTTATGACACTGCTGTTG	TGACAGTGACAGCAACAGCAGTGTCATAACCAGGTATGGCCTTGATTGCTGTCATTCTGA[CG]ACCTAGCCTCTCTTAGTTTCTGTTTCTTTTCCAAGTCTATTTCTCAAGCTTGCCCATTAA	TGACAGTGACAGCAACAGCAGTGTCATAACCAGGTATGGCCTTGATTGCTGTCATTCTGA[CG]ACCTAGCCTCTCTTAGTTTCTGTTTCTTTTCCAAGTCTATTTCTCAAGCTTGCCCATTAA	1						exon_1	ENSG00000280099	ENST00000624216.1					FALSE		EH38D4398006	EH38E2822121|Low-DNase;EH38E2822121|pELS	86;1	EnhWk;TssA;Quies;TxWk;EnhA1;TssFlnkD;TssFlnk;TssFlnkU;EnhA2;ReprPCWk;ReprPC	154;3;1323;98;13;14;14;25;12;6;1
cg02966574	cg02966574	-0.0332902	0.0070493	-4.72249	2.32976e-06	0.0154859	cg02966574_BC21	52639476	TAAACAACRCCTTCTACACAAAATAACTTTAAAATAAAACCAACRCTCCC						cg	R	B	C	2	II	15	68579743	Human	GRCh38	GGGCAGCGCCTTCTGCACAGAGTGGCTTTGGAGTGGAGCCAGCGCTCCCG	CCCCGAGGAGGCCAGCGGAGGGGAAACCCCACCCCACCTGCCAGCCTCTGCCGCCCATGC[CG]GGAGCGCTGGCTCCACTCCAAAGCCACTCTGTGCAGAAGGCGCTGCCCAGTCCCGGGAGC	CCCCGAGGAGGCCAGCGGAGGGGAAACCCCACCCCACCTGCCAGCCTCTGCCGCCCATGC[CG]GGAGCGCTGGCTCCACTCCAAAGCCACTCTGTGCAGAAGGCGCTGCCCAGTCCCGGGAGC	1				chr15:68578294-68579635	S_Shore						15:68871799-68872405	Unclassified_Cell_type_specific	TRUE		EH38D2803904	EH38E1773277|DNase-H3K4me3;EH38E1773277|DNase-H3K4me3/CTCF-bound;EH38E1773277|Low-DNase;EH38E1773277|pELS	10;1;64;12	TxWk;TssBiv;ReprPCWk;TssFlnkU;TssFlnkD;TssFlnk;TssA;EnhWk;ReprPC;Quies;EnhBiv;EnhA1;EnhA2;EnhG1;Tx;EnhG2	766;327;16;202;55;53;72;45;39;27;34;5;13;3;5;1	cg02966574
cg02973993	cg02973993	-0.0539921	0.0103437	-5.2198	1.79115e-07	0.00337697	cg02973993_TC21	81678234	AAATACAATACCTAACCTCTAAAAAATCAAAATTAACCCAAAAAACAAAC						cg	F	T	C	2	II	20	32745188	Human	GRCh38	CGTCTGCCCCCTGGGTCAATTCTGACTTCTCAGAGGCCAGGCACTGCATC	CCAGATGAACCAGATGCAGTGCCTGGCCTCTGAGAAGTCAGAATTGACCCAGGGGGCAGA[CG]CAAGTGTGTGTGAAAGTATTAAGGGATGCCAAAAAGTAGGAGGTGCTTTGAGAATGTGTA	CCAGATGAACCAGATGCAGTGCCTGGCCTCTGAGAAGTCAGAATTGACCCAGGGGGCAGA[CG]CAAGTGTGTGTGAAAGTATTAAGGGATGCCAAAAAGTAGGAGGTGCTTTGAGAATGTGTA	1				chr20:32743151-32743626	S_Shore								FALSE		EH38D3292507	EH38E2107276|CTCF-only/CTCF-bound;EH38E2107276|DNase-only;EH38E2107276|Low-DNase;EH38E2107276|pELS;EH38E2107276|pELS/CTCF-bound	7;8;64;4;4	Quies;TxWk;EnhWk;ReprPCWk;EnhA1;EnhA2;ReprPC;TssFlnkD;Het	1256;147;148;50;41;18;1;1;1	cg02973993
cg02983974	cg02983974	-0.0601902	0.012713	-4.73453	2.19566e-06	0.0149171	cg02983974_BC21	90605358	AAAAAATAATTACATCATAATAACAAATTTCCCCCTTTAAACCTATTCTC						cg	F	B	C	2	II	7	12826265	Human	GRCh38	GGAGATGATTGCATCATGGTGACAGATTTCCCCCTTTGGGCCTGTTCTCG	TGGGGCCTGGTGGGAGATGATTGCATCATGGTGACAGATTTCCCCCTTTGGGCCTGTTCT[CG]TGATAGAGTTGTCATGAGATCTGGTTGTCTAAAAGTGTTTGGCACCTTCCCCCTCATCCT	AGGATGAGGGGGAAGGTGCCAAACACTTTTAGACAACCAGATCTCATGACAACTCTATCA[CG]AGAACAGGCCCAAAGGGGGAAATCTGTCACCATGATGCAATCATCTCCCACCAGGCCCCA	1													FALSE		EH38D3946294			Quies;EnhA2;TxWk;EnhWk;ReprPCWk;Het	1646;2;7;2;2;4
cg02985292	cg02985292	-0.0421387	0.00966966	-4.35783	1.31356e-05	0.04428	cg02985292_TC21	25767859	TAACTTAACRCCTTTACTAAACCRTTTTTCACCAATAAAAACCCCATATC						cg	F	T	C	2	II	16	637604	Human	GRCh38	CGATATGGGGTTCCCATTGGTGAAAAACGGCTCAGCAAAGGCGCTAAGCC	GCATTCAGGACTGGCTTAGCGCCTTTGCTGAGCCGTTTTTCACCAATGGGAACCCCATAT[CG]CTCTGGCTAGGGCAAGGACGTTGGAAGGGGTAAACCAGGGAGGGCCAGTCACGTGGCTCA	GCATTCAGGACTGGCTTAGCGCCTTTGCTGAGCCGTTTTTCACCAATGGGAACCCCATAT[CG]CTCTGGCTAGGGCAAGGACGTTGGAAGGGGTAAACCAGGGAGGGCCAGTCACGTGGCTCA	1	TSS1500;TSS1500;TSS1500;TSS1500;TSS1500;TSS1500;TSS1500;TSS1500;TSS1500;TSS1500	METTL26;METTL26;METTL26;METTL26;METTL26;METTL26;METTL26;METTL26;METTL26;METTL26	NM_032366.5;NM_001040160.3;NM_001288710.2;NM_001040165.3;NM_001040162.3;NM_001040161.3;NR_109978.2;NR_109976.2;NR_109977.2;NR_109979.2	chr16:632634-637481;chr16:641597-642700	S_Shore;N_Shelf	TSS1500;TSS1500;TSS1500;TSS1500;TSS1500;TSS1500;TSS1500;TSS1500;TSS1500;TSS1500;TSS1500;TSS1500;TSS1500;TSS1500	ENSG00000130731.16;ENSG00000130731.16;ENSG00000130731.16;ENSG00000130731.16;ENSG00000130731.16;ENSG00000130731.16;ENSG00000130731.16;ENSG00000130731.16;ENSG00000130731.16;ENSG00000130731.16;ENSG00000130731.16;ENSG00000130731.16;ENSG00000130731.16;ENSG00000130731.16	ENST00000614890.4;ENST00000338401.8;ENST00000397666.6;ENST00000301686.13;ENST00000448973.6;ENST00000397664.8;ENST00000568077.5;ENST00000456420.6;ENST00000397665.6;ENST00000564039.1;ENST00000568773.1;ENST00000565163.5;ENST00000568830.1;ENST00000565799.1					FALSE		EH38D4914934	EH38E3160714|DNase-H3K4me3;EH38E3160714|Low-DNase;EH38E3160714|pELS;EH38E3160714|pELS/CTCF-bound	6;24;56;1	EnhWk;TssFlnkU;Quies;TssFlnkD;TssFlnk;EnhA1;TssA;EnhA2;ReprPCWk;TxWk;EnhBiv;ReprPC;EnhG1	599;493;45;117;20;169;11;42;89;61;5;11;1	cg02985292
cg03001711	cg03001711	-0.0178998	0.00369714	-4.84153	1.28841e-06	0.0105054	cg03001711_TC21	52632362	CRAATAACAAAACRCTATCRCTTATCTTAAACCAATTTCTCCATCACTCC						cg	R	T	C	2	II	16	3152850	Human	GRCh38	CGGAGTGATGGAGAAACTGGTCTAAGACAAGCGACAGCGTTTTGTTATCC	TGCAGTGGAGGGGCGGGAGAAAGGCCAGGGTAGGACGGGCAGGCTGTGCAGGAACCACCG[CG]GAGTGATGGAGAAACTGGTCTAAGACAAGCGACAGCGTTTTGTTATCCGCCCCGGTGGCC	GGCCACCGGGGCGGATAACAAAACGCTGTCGCTTGTCTTAGACCAGTTTCTCCATCACTC[CG]CGGTGGTTCCTGCACAGCCTGCCCGTCCTACCCTGGCCTTTCTCCCGCCCCTCCACTGCA	1				chr16:3149651-3149936;chr16:3150383-3150618	S_Shelf;S_Shelf						16:3201968-3203089	Promoter_Associated	TRUE		EH38D4919443	EH38E3164122|dELS;EH38E3164122|dELS/CTCF-bound;EH38E3164122|DNase-H3K4me3;EH38E3164122|DNase-H3K4me3/CTCF-bound;EH38E3164122|DNase-only;EH38E3164122|Low-DNase	40;1;33;2;8;3	TxWk;TssA;TssFlnkU;ReprPCWk;EnhA2;TssBiv;TssFlnkD;Quies;TssFlnk;EnhWk;ReprPC;Het;EnhA1;EnhBiv	477;442;99;154;51;16;15;224;156;16;4;1;5;3	cg03001711
cg03004986	cg03004986	0.0197201	0.00445647	4.42505	9.64209e-06	0.0367402	cg03004986_BC21	13640936	TCATATTATCTTTTTTATTTTCTTCATCTTCCTCCTTTTTTATATCTTTC						cg	F	B	C	2	II	7	17821711	Human	GRCh38	GGGTCATAGTCAGCATATACTAATCATTTAAAACAAAATGAAGAGGAACG	GCCACAGCATATGGGTCATAGTCAGCATATACTAATCATTTAAAACAAAATGAAGAGGAA[CG]AAAGACACAAAAAAGGAGGAAGATGAAGAAAACAAAAAAGATAATATGAAATGAAGAAGA	TCTTCTTCATTTCATATTATCTTTTTTGTTTTCTTCATCTTCCTCCTTTTTTGTGTCTTT[CG]TTCCTCTTCATTTTGTTTTAAATGATTAGTATATGCTGACTATGACCCATATGCTGTGGC	1						TSS200	ENSG00000071189.21	ENST00000496855.1					FALSE					Quies;TxWk;Tx;EnhWk;EnhA1;ReprPCWk;EnhA2	1310;233;48;44;23;2;3
cg03020424	cg03020424	-0.0243798	0.00557783	-4.37083	1.23774e-05	0.0428281	cg03020424_TC21	52730234	CTTCTCAAAATCACRCTTATATACTATCAAAATAATATAATTAAAAACAC						cg	R	T	C	2	II	3	148864014	Human	GRCh38	CGTGTCTCCAACCACACTATTTTGATAGTACATAAGCGTGACTCTGAGAA	TACCACACACCCATCAGATAGAGAAGAATGGAATTACTGCTGCTGTATATATAACAGGGG[CG]TGTCTCCAACCACACTATTTTGATAGTACATAAGCGTGACTCTGAGAAGTTTTATCTACA	TGTAGATAAAACTTCTCAGAGTCACGCTTATGTACTATCAAAATAGTGTGGTTGGAGACA[CG]CCCCTGTTATATATACAGCAGCAGTAATTCCATTCTTCTCTATCTGATGGGTGTGTGGTA	1	TSS1500	CPA3	NM_001870.4			TSS1500	ENSG00000163751.4	ENST00000296046.4	chr3:148863967-148864075				FALSE		EH38D5503400			TxWk;Quies;EnhA1;EnhA2;ReprPCWk;EnhWk;Tx;EnhG1;TssFlnkU;ReprPC;EnhG2;TssFlnkD;EnhBiv	501;837;92;63;39;31;74;11;8;3;1;2;1	cg03020424
cg03020545	cg03020545	-0.0509162	0.00747631	-6.81035	9.73638e-12	8.97809e-06	cg03020545_TC21	15808451	TCCTAAAACTAAAACAATACTAAAACAAAAATCTTCTTACAACTATCTCC						cg	R	T	C	2	II	6	72620630	Human	GRCh38	CGGAGACAGCTGCAAGAAGACTTTTGTCTTAGCATTGTTTTAGCCTTAGG	GCGGGCGTGGGTGTGTGTACAGGGTGGGGGAGAATTGGGAAAGTATTTATCTCGGAGGGG[CG]GAGACAGCTGCAAGAAGACTTTTGTCTTAGCATTGTTTTAGCCTTAGGAAAGGAAAAGGC	GCCTTTTCCTTTCCTAAGGCTAAAACAATGCTAAGACAAAAGTCTTCTTGCAGCTGTCTC[CG]CCCCTCCGAGATAAATACTTTCCCAATTCTCCCCCACCCTGTACACACACCCACGCCCGC	1	TSS1500;TSS1500;TSS1500;TSS1500;TSS1500	KCNQ5;KCNQ5;KCNQ5;KCNQ5;KCNQ5	NM_001160130.2;NM_001160132.2;NM_001160134.2;NM_019842.4;NM_001160133.2	chr6:72621214-72623381	N_Shore	exon_1;exon_1;TSS1500;TSS1500;TSS1500;TSS1500;TSS1500	KCNQ5-DT;KCNQ5-DT;ENSG00000185760.18;ENSG00000185760.18;ENSG00000185760.18;ENSG00000185760.18;ENSG00000185760.18	ENST00000649228.1;ENST00000664828.1;ENST00000342056.6;ENST00000628967.2;ENST00000692515.1;ENST00000370398.6;ENST00000370392.5					FALSE		EH38D5767262	EH38E3716327|DNase-H3K4me3;EH38E3716327|DNase-H3K4me3/CTCF-bound;EH38E3716327|Low-DNase;EH38E3716327|pELS;EH38E3716327|pELS/CTCF-bound	6;2;70;8;1	Quies;TssBiv;TssA;TssFlnk;TssFlnkU;TssFlnkD;ReprPC;EnhBiv;ReprPCWk;EnhWk;EnhA1;Het;TxWk;EnhA2	831;387;28;98;100;77;33;30;43;20;4;3;5;4	cg03020545
cg03025061	cg03025061	-0.019925	0.00433043	-4.60115	4.20167e-06	0.0223369	cg03025061_BC21	3638553	CTATATATAACTTCCTAAAAAACAAAAACCTCCTCATATTATCCTTTACC						cg	R	B	C	2	II	8	108249046	Human	GRCh38	TGTATGTAACTTCCTGGAAAGCAGGGGCCTCCTCATGTTGTCCTTTGCCG	CGTTAATAACTATTGAAAGCTCAGAATTGATTGCTGAGGCAATGTGACTGCATTGGGATG[CG]GCAAAGGACAACATGAGGAGGCCCCTGCTTTCCAGGAAGTTACATACAGGGAAGAATATC	CGTTAATAACTATTGAAAGCTCAGAATTGATTGCTGAGGCAATGTGACTGCATTGGGATG[CG]GCAAAGGACAACATGAGGAGGCCCCTGCTTTCCAGGAAGTTACATACAGGGAAGAATATC	1	TSS1500	EIF3E	NM_001568.3	chr8:108248297-108248898	S_Shore	TSS1500;TSS1500;TSS1500;TSS1500;TSS1500;TSS1500;TSS1500;TSS1500;TSS1500;TSS1500;TSS1500;TSS1500;TSS1500;TSS1500;TSS1500;TSS1500;TSS1500;TSS1500;TSS1500;TSS1500;TSS1500;TSS1500;TSS1500;TSS1500;TSS1500;TSS1500;TSS1500;TSS1500;TSS1500	ENSG00000104408.11;ENSG00000104408.11;ENSG00000104408.11;ENSG00000104408.11;ENSG00000104408.11;ENSG00000104408.11;ENSG00000104408.11;ENSG00000104408.11;ENSG00000104408.11;ENSG00000104408.11;ENSG00000104408.11;ENSG00000104408.11;ENSG00000104408.11;ENSG00000104408.11;ENSG00000104408.11;ENSG00000104408.11;ENSG00000104408.11;ENSG00000104408.11;ENSG00000104408.11;ENSG00000104408.11;ENSG00000104408.11;…	ENST00000678042.1;ENST00000678773.1;ENST00000220849.10;ENST00000678937.1;ENST00000523674.2;ENST00000677674.1;ENST00000676892.1;ENST00000676706.1;ENST00000518100.6;ENST00000521297.2;ENST00000522352.6;ENST00000676698.1;ENST00000519627.2;ENST00000519030.6;ENST00000518345.2;ENST00000522445.6;ENST00000677965.1;ENST00000676642.1;ENST00000678901.1;ENST00000678243.1;ENST00000678004.1;ENST00000677590.1;EN…			8:109260563-109261372	Promoter_Associated	TRUE					Quies;TxWk;TssA;TssFlnkU;TssFlnk;ReprPCWk;TssFlnkD;Het;EnhA2	805;21;678;125;23;2;3;2;4	cg03025061
cg03028972	cg03028972	-0.0402231	0.00929612	-4.32687	1.51246e-05	0.0480413	cg03028972_TC21	88782937	CCAACTAATAATATTAAACAAATAATCTAACCTCTCTAAACTTCAATTTC						cg	F	T	C	2	II	1	115875027	Human	GRCh38	CGAAACTGAAGCCTAGAGAGGTTAGATTACTTGCCCAACATCACTAGCTG	GAGTTTGAATTCCAGCTAGTGATGTTGGGCAAGTAATCTAACCTCTCTAGGCTTCAGTTT[CG]TGTTCTTTTCAGCTTTCAAGCAAGATCTATTGAACACCCCCTTATGCCACGTCACACTAT	GAGTTTGAATTCCAGCTAGTGATGTTGGGCAAGTAATCTAACCTCTCTAGGCTTCAGTTT[CG]TGTTCTTTTCAGCTTTCAAGCAAGATCTATTGAACACCCCCTTATGCCACGTCACACTAT	1													FALSE		EH38D2214635			Quies;ReprPCWk;EnhA2;ReprPC;TxWk;EnhA1;EnhWk;TssFlnkU	952;283;243;3;76;83;22;1
cg03044900	cg03044900	-0.0416337	0.00839019	-4.96219	6.97029e-07	0.00741886	cg03044900_TC21	50654140	AAATTTCAATATACTATAAAACTAACCCRTAAAAACAAAATCCTCTACTC						cg	R	T	C	2	II	17	64022894	Human	GRCh38	CGAGCAGAGGATCTTGCTCCCACGGGCCAGCCTCACAGCACATTGAAACT	GCAGAAAGTATGAACACTGGGTGCAGAGGTGGGTGGCGGGCAGCCAGCTAGGCTCACCCA[CG]AGCAGAGGATCTTGCTCCCACGGGCCAGCCTCACAGCACATTGAAACTTCTGGCTTAGCA	TGCTAAGCCAGAAGTTTCAATGTGCTGTGAGGCTGGCCCGTGGGAGCAAGATCCTCTGCT[CG]TGGGTGAGCCTAGCTGGCTGCCCGCCACCCACCTCTGCACCCAGTGTTCATACTTTCTGC	1													FALSE		EH38D5031165	EH38E3236916|dELS;EH38E3236916|DNase-only;EH38E3236916|Low-DNase	2;7;78	Quies;EnhA1;TxWk;EnhA2;ReprPCWk;EnhWk;EnhBiv;Tx;Het;TssFlnkU	1018;112;413;35;49;17;1;15;2;1
cg03048432	cg03048432	-0.061163	0.0135185	-4.5244	6.05682e-06	0.0278369	cg03048432_TC21	5705295	ACTAAAATCTACTAAAAATCCCCAAAATACTCCAAAATTTTCAATATTAC						cg	F	T	C	2	II	14	50824033	Human	GRCh38	CGCAACACTGAAAATCCTGGAGCACCTTGGGGATTCTCAGCAGATCTTAG	GTTAATTGTCAACTAAGATCTGCTGAGAATCCCCAAGGTGCTCCAGGATTTTCAGTGTTG[CG]GTAGCTCTTAGTCTCACTCTGAGTTTTACAGTCCCCTGGGCTGTTATCTGACCGACCTCA	GTTAATTGTCAACTAAGATCTGCTGAGAATCCCCAAGGTGCTCCAGGATTTTCAGTGTTG[CG]GTAGCTCTTAGTCTCACTCTGAGTTTTACAGTCCCCTGGGCTGTTATCTGACCGACCTCA	1											14:51290568-51290914	Promoter_Associated	TRUE		EH38D2717132	EH38E1713107|dELS;EH38E1713107|Low-DNase	4;83	Quies;EnhWk;EnhA2;TssFlnkU;EnhA1;TssA;ReprPC;Tx;TxWk;EnhBiv;ReprPCWk;TssBiv;TssFlnk;TssFlnkD;EnhG1	734;146;98;112;149;15;21;24;244;37;67;8;4;3;1	cg03048432
cg03068433	cg03068433	-0.0385229	0.00665262	-5.79063	7.01215e-09	0.000513942	cg03068433_TC21	75717462	TTATTCATAATTATAACACRCTAAACTTCTCTTTACTAATACTTATCAAC						cg	R	T	C	2	II	5	134412469	Human	GRCh38	CGTTGACAAGTATTAGTAAAGAGAAGTTCAGCGTGCTACAACCATGAATA	CCATGGAGTGGAGGAGTGGACATTAGTGACATAATTGCTCAAGTAAATGGAGAATTTCAG[CG]TTGACAAGTATTAGTAAAGAGAAGTTCAGCGTGCTACAACCATGAATAAGCAAGGGACCC	GGGTCCCTTGCTTATTCATGGTTGTAGCACGCTGAACTTCTCTTTACTAATACTTGTCAA[CG]CTGAAATTCTCCATTTACTTGAGCAATTATGTCACTAATGTCCACTCCTCCACTCCATGG	1	TSS1500	CDKN2AIPNL	NM_080656.3	chr5:134411675-134412108	S_Shore	TSS1500;TSS1500	ENSG00000237190.4;ENSG00000237190.4	ENST00000458198.3;ENST00000395009.3			5:133746777-133748558	Promoter_Associated	TRUE		EH38D5686806	EH38E3661866|DNase-H3K4me3;EH38E3661866|DNase-H3K4me3/CTCF-bound;EH38E3661866|Low-DNase;EH38E3661866|pELS;EH38E3661866|pELS/CTCF-bound	1;4;52;20;10	Quies;TssFlnkU;ReprPCWk;ReprPC;TssA;TssFlnk;TssFlnkD;EnhA2;EnhWk;EnhA1;Het;TxWk	382;681;336;90;56;25;41;16;11;13;4;8
cg03072598	cg03072598	-0.0263695	0.00566291	-4.65653	3.21585e-06	0.0189317	cg03072598_BC21	98655285	CTATATTATTATTTACTTTACCATACACATCCTAATATAATTACCTCCCC						cg	R	B	C	2	II	3	71245229	Human	GRCh38	TATGTTATTGTTTACTTTACCATACACATCCTAATATGGTTACCTCCCCG	AAGCAGTTAGGAGCTTTCTCCCGGAGGGGGCCTCTCAACCCCTGGCTTGGCCTCCTCTGA[CG]GGGAGGTAACCATATTAGGATGTGTATGGTAAAGTAAACAATAACATAGTTGCAATGAAA	AAGCAGTTAGGAGCTTTCTCCCGGAGGGGGCCTCTCAACCCCTGGCTTGGCCTCCTCTGA[CG]GGGAGGTAACCATATTAGGATGTGTATGGTAAAGTAAACAATAACATAGTTGCAATGAAA	1	TSS200	FOXP1	NM_001244814.3			TSS200	ENSG00000114861.24	ENST00000498215.7					FALSE		EH38D5465206	EH38E3522307|DNase-only;EH38E3522307|Low-DNase;EH38E3522307|pELS;EH38E3522307|PLS;EH38E3522307|PLS/CTCF-bound	1;74;2;7;3	Quies;TssFlnkU;TxWk;TssA;EnhA2;Tx;TssFlnkD;EnhA1;EnhWk;ReprPCWk;EnhBiv;TssFlnk;TssBiv;EnhG1	627;369;209;104;36;64;13;87;120;3;1;27;2;1
cg03082763	cg03082763	-0.0157158	0.00322856	-4.86773	1.1289e-06	0.00979839	cg03082763_TC21	42712488	AAAAACAATAACCAAAACCCTATCAATCTATCTTTACTCAACCACATACC						cg	R	T	C	2	II	19	12551624	Human	GRCh38	CGGTATGTGGCTGAGTAAAGACAGATTGACAGGGTCTTGGCCACTGCCCT	CCTGATTGGGTGATGATTCAAGTCCTGCCCCCTTGGTACTGAGTGACAGGAGAAGCAATG[CG]GTATGTGGCTGAGTAAAGACAGATTGACAGGGTCTTGGCCACTGCCCTTCGCGGGCCGGG	CCCGGCCCGCGAAGGGCAGTGGCCAAGACCCTGTCAATCTGTCTTTACTCAGCCACATAC[CG]CATTGCTTCTCCTGTCACTCAGTACCAAGGGGGCAGGACTTGAATCATCACCCAATCAGG	1	TSS200	ZNF564	NM_144976.4	chr19:12550990-12551488;chr19:12555429-12555868	S_Shore;N_Shelf	TSS200;TSS200;TSS200;TSS200;TSS200;TSS200;TSS1500	ENSG00000196826.7;ENSG00000249709.8;ENSG00000249709.8;ENSG00000249709.8;ENSG00000249709.8;ENSG00000249709.8;ENSG00000230310.1	ENST00000428311.1;ENST00000339282.12;ENST00000427105.1;ENST00000596193.1;ENST00000416136.1;ENST00000465410.1;ENST00000414548.1			19:12661474-12662964	Promoter_Associated	TRUE		EH38D5111045	EH38E3291031|PLS;EH38E3291031|PLS/CTCF-bound	81;6	TssA;TssFlnk;TssFlnkU;EnhA2	1604;55;3;1	cg03082763
cg03087010	cg03087010	-0.0453728	0.0100832	-4.49986	6.79994e-06	0.0299388	cg03087010_BC21	79781367	ACTTCCTAACAACAAAAAACAATAACTAATAAAAATTTACCCACCTCCAC						cg	R	B	C	2	II	18	45724210	Human	GRCh38	CTTCCTGGCAGCAGAAGGCAGTGGCTGATAAAGATTTGCCCACCTCCACG	AGTATATAACTGTTAGGTGCCTCCCTCCAGCACCATCTCCTGAGAAGCACTCTCCCTTGT[CG]TGGAGGTGGGCAAATCTTTATCAGCCACTGCCTTCTGCTGCCAGGAAGCCAGCTAGAGTG	AGTATATAACTGTTAGGTGCCTCCCTCCAGCACCATCTCCTGAGAAGCACTCTCCCTTGT[CG]TGGAGGTGGGCAAATCTTTATCAGCCACTGCCTTCTGCTGCCAGGAAGCCAGCTAGAGTG	1	5UTR;exon_1;5UTR;exon_1;5UTR;exon_1;5UTR;exon_1;5UTR;exon_1	SLC14A1;SLC14A1;SLC14A1;SLC14A1;SLC14A1;SLC14A1;SLC14A1;SLC14A1;SLC14A1;SLC14A1	NM_001128588.4;NM_001128588.4;NM_001146036.3;NM_001146036.3;NM_001308278.2;NM_001308278.2;NM_001308279.2;NM_001308279.2;NM_015865.7;NM_015865.7			exon_3;exon_1;exon_1;exon_1;exon_1;exon_1;exon_1;exon_1;exon_1;exon_1;exon_1;5UTR;5UTR;5UTR;5UTR;5UTR;5UTR;5UTR;5UTR;5UTR;5UTR;TSS1500	SLC14A1;SLC14A1;SLC14A1;SLC14A1;SLC14A1;SLC14A1;SLC14A1;SLC14A1;SLC14A1;SLC14A1;SLC14A1;SLC14A1;SLC14A1;SLC14A1;SLC14A1;SLC14A1;SLC14A1;SLC14A1;SLC14A1;SLC14A1;SLC14A1;ENSG00000141469.18	ENST00000644925.1;ENST00000619403.4;ENST00000587601.5;ENST00000502059.7;ENST00000321925.9;ENST00000415427.7;ENST00000589322.7;ENST00000586951.6;ENST00000535474.5;ENST00000402943.6;ENST00000588179.6;ENST00000321925.9;ENST00000402943.6;ENST00000415427.7;ENST00000502059.7;ENST00000535474.5;ENST00000586951.6;ENST00000588179.6;ENST00000589322.7;ENST00000619403.4;ENST00000587601.5;ENST00000586056.5					FALSE		EH38D5074494	EH38E3266317|Low-DNase;EH38E3266317|PLS	86;1	Quies;ReprPCWk;ReprPC;TxWk;EnhWk;TssA;TssFlnkD;TssFlnkU;EnhA2;TssFlnk;Het;EnhA1;EnhBiv;Tx	1125;320;56;39;35;9;22;9;6;31;3;4;1;3
cg03088525	cg03088525	-0.0231777	0.00522031	-4.43991	8.99948e-06	0.0352449	cg03088525_TC21	52645448	AATTCCTACTAAATTAAAACRCCTACTAACATCCRAAACCTCTATTCACC						cg	R	T	C	2	II	16	19410585	Human	GRCh38	CGGTGAATAGAGGTCTCGGATGCCAGCAGGCGTCCCAACCCAGCAGGAAC	GTCTGGTGGCCATCAGGTAAGGCTGGGTCATGGAAAGAAAGAATGAATGCAGACTACGGG[CG]GTGAATAGAGGTCTCGGATGCCAGCAGGCGTCCCAACCCAGCAGGAACTGGCTCAATTCT	AGAATTGAGCCAGTTCCTGCTGGGTTGGGACGCCTGCTGGCATCCGAGACCTCTATTCAC[CG]CCCGTAGTCTGCATTCATTCTTTCTTTCCATGACCCAGCCTTACCTGATGGCCACCAGAC	1	5UTR;exon_1;TSS200;TSS200	TMC5;TMC5;TMC5;TMC5	NM_001308161.1;NM_001308161.1;NM_001105249.1;NM_001105248.1	chr16:19410494-19411176	Island	exon_1;5UTR;TSS200;TSS200	TMC5;TMC5;ENSG00000103534.17;ENSG00000103534.17	ENST00000541464.5;ENST00000541464.5;ENST00000381414.8;ENST00000396229.6					FALSE		EH38D4931388	EH38E3171714|CTCF-only/CTCF-bound;EH38E3171714|Low-DNase;EH38E3171714|PLS;EH38E3171714|PLS/CTCF-bound	1;51;1;34	Quies;ReprPC;TxWk;TssBiv;ReprPCWk;TssA;EnhBiv;TssFlnkU;Het;TssFlnkD;TssFlnk;EnhWk;EnhA1;ZNF/Rpts;EnhA2	632;106;67;498;57;61;66;25;84;14;34;6;4;3;6	cg03088525
cg03094242	cg03094242	-0.0403948	0.00802265	-5.03509	4.77629e-07	0.00600339	cg03094242_BC21	73622373	AAATTCTCTACAAATTATCAAATCCACAAAATTACCCTTACATTAAAACC						cg	F	B	C	2	II	2	17822097	Human	GRCh38	GATTCTCTGCAAATTGTCAAGTCCACAGAATTACCCTTACATTAAAACCG	CAGGGGTGGAGGGATTCTCTGCAAATTGTCAAGTCCACAGAATTACCCTTACATTAAAAC[CG]TTGCTTTTTTTAAGCAACAGCAAAATAAGATGGGTAAGCAAATGCACTTGGGCTTCTAAG	CTTAGAAGCCCAAGTGCATTTGCTTACCCATCTTATTTTGCTGTTGCTTAAAAAAAGCAA[CG]GTTTTAATGTAAGGGTAATTCTGTGGACTTGACAATTTGCAGAGAATCCCTCCACCCCTG	1													FALSE					Quies;TxWk;EnhA1;EnhWk;EnhA2;ReprPCWk;ReprPC;TssFlnkU;TssFlnkD;EnhBiv;Tx	1125;89;142;203;29;68;2;2;1;1;1
cg03095344	cg03095344	-0.0724252	0.0165885	-4.366	1.26543e-05	0.0433343	cg03095344_BC21	21804105	CTCTAAATCTACTAATAATCCTCAAACATCCTCTATCRTCAAATAACTAC						cg	F	B	C	2	II	9	130129191	Human	GRCh38	TCTAAGTCTGCTAATGATCCTCAGACATCCTCTATCGTCAGATAACTGCG	TTCTGAGTCATCTCTAAGTCTGCTAATGATCCTCAGACATCCTCTATCGTCAGATAACTG[CG]TGGCTTTTCACAGCACAATGACTTTGACCTATATCTGAGCACTAATAGGGGCTTTTCTGA	TCAGAAAAGCCCCTATTAGTGCTCAGATATAGGTCAAAGTCATTGTGCTGTGAAAAGCCA[CG]CAGTTATCTGACGATAGAGGATGTCTGAGGATCATTAGCAGACTTAGAGATGACTCAGAA	1	exon_17;3UTR	GPR107;GPR107	NM_001287346.2;NM_001287346.2			exon_17;3UTR;TSS1500	GPR107;GPR107;ENSG00000148358.20	ENST00000493417.5;ENST00000493417.5;ENST00000415344.1			9:132890396-132892429	Promoter_Associated	TRUE		EH38D4244809	EH38E2731213|dELS;EH38E2731213|DNase-only;EH38E2731213|Low-DNase	13;3;71	Quies;ReprPCWk;EnhA1;TxWk;ReprPC;EnhA2;EnhG1;EnhG2;TssFlnkU;Tx;EnhWk;TssA;TssFlnkD;Het	601;108;233;176;5;143;130;111;37;92;23;2;1;1
cg03103611	cg03103611	-0.0637863	0.0124485	-5.124	2.99121e-07	0.00464381	cg03103611_BC21	71647437	ATAAAAATAAACTTATATACAAAATCAATTAATACACTATCAAAAATCCC						cg	F	B	C	2	II	1	38013556	Human	GRCh38	TAGAAATAAGCTTATATGCAGAATCAGTTGATACACTGTCAGGAATCCCG	AGGGAGGTTGAGTAGAAATAAGCTTATATGCAGAATCAGTTGATACACTGTCAGGAATCC[CG]TGCTTAATATCTGATTCAGAAAGGCCCTTAGACATACATATGTGCTCCAACTTAGTTTTA	TAAAACTAAGTTGGAGCACATATGTATGTCTAAGGGCCTTTCTGAATCAGATATTAAGCA[CG]GGATTCCTGACAGTGTATCAACTGATTCTGCATATAAGCTTATTTCTACTCAACCTCCCT	1				chr1:38012410-38013055	S_Shore								FALSE					TxWk;Tx;TssFlnkD;EnhA2;TssFlnkU;TssFlnk;TssA;EnhWk;EnhA1;Quies	730;105;325;8;326;93;31;28;12;5	cg03103611
cg03103888	cg03103888	-0.0430682	0.00797376	-5.40124	6.61813e-08	0.00180183	cg03103888_TC21	14678432	TATAACTAAACTATTATTTTAATAACTCACTCAACTACTAAACTTCTCTC						cg	R	T	C	2	II	13	113493448	Human	GRCh38	CGAGAGAAGCTTAGCAGTTGAGTGAGTCATTAAAATAACAGCTCAGCTAT	AAAATACTAAAAGTTCACTTGTGAAGTAGCTGTTGATTTATTTAGCTCCGTTGGACCAAC[CG]AGAGAAGCTTAGCAGTTGAGTGAGTCATTAAAATAACAGCTCAGCTATATGGCTAGGCAT	ATGCCTAGCCATATAGCTGAGCTGTTATTTTAATGACTCACTCAACTGCTAAGCTTCTCT[CG]GTTGGTCCAACGGAGCTAAATAAATCAACAGCTACTTCACAAGTGAACTTTTAGTATTTT	1				chr13:113490163-113491310;chr13:113491650-113491857	S_Shelf;S_Shore				chr13:113493384-113493838				FALSE		EH38D4797756	EH38E3083992|dELS;EH38E3083992|DNase-only;EH38E3083992|Low-DNase	20;4;63	TxWk;Tx;EnhA1;EnhA2;EnhWk;TssA;TssFlnkU;Quies;TssFlnk;EnhG1;TssFlnkD;ReprPCWk	616;278;185;159;63;30;207;59;29;24;12;1	cg03103888
cg03110491	cg03110491	-0.028225	0.00623333	-4.52807	5.95239e-06	0.0274815	cg03110491_BC21	10719989	AACACTCAACCCTACCCTTCTTAAAATTCTAATACCCCATCTAAAACTCC						cg	R	B	C	2	II	19	11505033	Human	GRCh38	GCACTCAGCCCTGCCCTTCTTGAAGTTCTGGTGCCCCATCTGGGACTCCG	TCCAGGTTGTGAAGGGTCCCCCGGATGTGTTGGATCTAGGGTTGTGGGAATGGGGCCATA[CG]GAGTCCCAGATGGGGCACCAGAACTTCAAGAAGGGCAGGGCTGAGTGCCCCAGGGTGTCC	TCCAGGTTGTGAAGGGTCCCCCGGATGTGTTGGATCTAGGGTTGTGGGAATGGGGCCATA[CG]GAGTCCCAGATGGGGCACCAGAACTTCAAGAAGGGCAGGGCTGAGTGCCCCAGGGTGTCC	1				chr19:11505216-11506032	N_Shore	exon_1	ZNF653	ENST00000593191.1			19:11615440-11617264	Promoter_Associated	TRUE		EH38D5110394	EH38E3290578|DNase-H3K4me3;EH38E3290578|Low-DNase;EH38E3290578|pELS;EH38E3290578|pELS/CTCF-bound	3;48;34;2	Quies;EnhWk;TssFlnkU;TssA;ReprPCWk;TxWk;TssFlnk;ReprPC;Tx;EnhA2;TssFlnkD;EnhA1;Het;EnhG1;ZNF/Rpts	687;2;611;169;59;51;30;7;18;6;13;3;3;3;1	cg03110491
cg03110770	cg03110770	-0.0356915	0.00779077	-4.58126	4.62188e-06	0.0235702	cg03110770_BC21	11766904	AACTTCAAAATACAAAACTAACTAAACCAAATAAACCACAAAACCCRAAC						cg	R	B	C	2	II	1	44595354	Human	GRCh38	GCTTCAGGGTGCAGGACTGGCTGGGCCAGATGGACCACAGGGCCCGGGCG	CAGTGCTGGAGCCACAGCGACACCTACTGGCCACGGACACCTAGGCCACCCCCTCCAGGA[CG]CCCGGGCCCTGTGGTCCATCTGGCCCAGCCAGTCCTGCACCCTGAAGCTGGCATTCCTGA	CAGTGCTGGAGCCACAGCGACACCTACTGGCCACGGACACCTAGGCCACCCCCTCCAGGA[CG]CCCGGGCCCTGTGGTCCATCTGGCCCAGCCAGTCCTGCACCCTGAAGCTGGCATTCCTGA	1											1:45060199-45061310	Unclassified	TRUE		EH38D4376356	EH38E2808198|CTCF-only/CTCF-bound;EH38E2808198|DNase-only;EH38E2808198|Low-DNase	68;1;18	Quies;ReprPC;ReprPCWk;EnhBiv;EnhA2;EnhA1;EnhWk;TxWk;ZNF/Rpts;TssFlnkD	839;28;681;20;25;18;28;22;1;1
cg03111263	cg03111263	-0.0322292	0.00743778	-4.33318	1.46973e-05	0.047177	cg03111263_TC21	29791574	AAATAAAAAAAACTCCAAAAACCAAACCAACTCACRCAAACCTCACATCC						cg	F	T	C	2	II	1	54413520	Human	GRCh38	CGGATGTGAGGCTTGCGTGAGTTGGCCTGGCCTCTGGAGCTCCTTTTACT	TGTTCTTTCCAGAGTAAAAGGAGCTCCAGAGGCCAGGCCAACTCACGCAAGCCTCACATC[CG]CTCCCAAGTCACATGGCCAAGCCCAGCATCAATGGGGCAGGAAGGGGGAGTGAATGTTTG	TGTTCTTTCCAGAGTAAAAGGAGCTCCAGAGGCCAGGCCAACTCACGCAAGCCTCACATC[CG]CTCCCAAGTCACATGGCCAAGCCCAGCATCAATGGGGCAGGAAGGGGGAGTGAATGTTTG	1	TSS200;TSS200;TSS200;TSS200	SSBP3;SSBP3;SSBP3;SSBP3	NM_001394367.1;NM_001394364.1;NM_001394366.1;NM_001394365.1			TSS200;TSS200	ENSG00000157216.16;ENSG00000157216.16	ENST00000525990.1;ENST00000448572.1			1:54879180-54879235	Unclassified_Cell_type_specific	TRUE		EH38D2167694	EH38E1348998|dELS;EH38E1348998|DNase-only;EH38E1348998|Low-DNase	5;23;59	TxWk;EnhWk;EnhA1;Quies;TssFlnkD;EnhA2;TssFlnk;TssFlnkU;ReprPCWk;EnhG1;EnhBiv;TssA;ReprPC	418;445;251;214;102;88;36;50;48;4;4;2;1
cg03116258	cg03116258	-0.0220404	0.00484039	-4.55343	5.27781e-06	0.0254441	cg03116258_TC21	70740538	TACTCCCACTCAAATTATAATCCAAACTATAACTCACAAAACTTCAATAC						cg	R	T	C	2	II	7	27095595	Human	GRCh38	CGCACTGAAGTTCTGTGAGCCATAGCTTGGACCACAACTTGAGTGGGAGT	GCACTGGGGGTACCCACCACTTACGTCTGCTTCCTGATTTAACGCGTAGGGGCTGTAAGG[CG]CACTGAAGTTCTGTGAGCCATAGCTTGGACCACAACTTGAGTGGGAGTAGGACACCCCCA	TGGGGGTGTCCTACTCCCACTCAAGTTGTGGTCCAAGCTATGGCTCACAGAACTTCAGTG[CG]CCTTACAGCCCCTACGCGTTAAATCAGGAAGCAGACGTAAGTGGTGGGTACCCCCAGTGC	1	exon_1;exon_1;TSS1500;TSS1500	HOXA1;HOXA1;HOTAIRM1;HOTAIRM1	NM_005522.5;NM_153620.3;NR_038367.1;NR_038366.1	chr7:27094478-27094684;chr7:27095723-27097117	S_Shore;N_Shore	exon_1;exon_1;TSS200;TSS1500;TSS1500;TSS1500;TSS1500	HOXA1;HOXA1;ENSG00000233429.9;ENSG00000233429.9;ENSG00000233429.9;ENSG00000233429.9;ENSG00000276528.1	ENST00000643460.2;ENST00000355633.5;ENST00000495032.1;ENST00000434063.3;ENST00000429611.7;ENST00000425358.2;ENST00000622675.1					FALSE	CDMR	EH38D3957776	EH38E2542466|DNase-H3K4me3;EH38E2542466|Low-DNase;EH38E2542466|pELS;EH38E2542466|pELS/CTCF-bound	4;71;11;1	Quies;ReprPCWk;TssBiv;TssFlnk;TssA;TssFlnkU;ReprPC;EnhBiv;TssFlnkD;TxWk;EnhA2;EnhA1;EnhWk	804;34;540;71;68;53;43;18;25;3;2;1;1	cg03116258
cg03117079	cg03117079	-0.0362868	0.00816712	-4.44303	8.86996e-06	0.0349346	cg03117079_BC21	64700458	AAACCCTTTAAAATAAAACAAACCCAAATTTAAATTCCACRATCACRAAC						cg	F	B	C	2	II	1	91022458	Human	GRCh38	GGCCCTTTAAGGTGGAACAGGCCCAGGTTTGAGTTCCACGATCACGAGCG	TAGGCATGCCTAGGCCCTTTAAGGTGGAACAGGCCCAGGTTTGAGTTCCACGATCACGAG[CG]TGCAAAAATCTCTGTTATTTTCCTCTTGTTGAGGAAAACAGCAATATTTGCCAATCACAA	TTGTGATTGGCAAATATTGCTGTTTTCCTCAACAAGAGGAAAATAACAGAGATTTTTGCA[CG]CTCGTGATCGTGGAACTCAAACCTGGGCCTGTTCCACCTTAAAGGGCCTAGGCATGCCTA	1	TSS1500;TSS1500;TSS1500	ZNF644;ZNF644;ZNF644	NM_016620.4;NM_201269.3;NM_032186.5	chr1:91021601-91022250	S_Shore	TSS1500;TSS1500;TSS1500;TSS200;TSS1500;TSS1500;TSS1500;TSS1500;TSS1500	ENSG00000122482.22;ENSG00000122482.22;ENSG00000122482.22;ENSG00000122482.22;ENSG00000122482.22;ENSG00000122482.22;ENSG00000122482.22;ENSG00000122482.22;ENSG00000232393.1	ENST00000370440.5;ENST00000347275.9;ENST00000337393.10;ENST00000361321.5;ENST00000467231.5;ENST00000498303.5;ENST00000495966.1;ENST00000482467.1;ENST00000425640.1			1:91487545-91488055	Promoter_Associated	TRUE					Quies;TssFlnkU;ReprPCWk;TssA;EnhA2;EnhA1;Het;TssFlnkD;TssFlnk;EnhWk;TxWk	752;764;74;52;9;5;1;2;1;1;2	cg03117079
cg03118854	cg03118854	-0.0323269	0.00718208	-4.50104	6.76212e-06	0.0298608	cg03118854_TC21	51668298	CTTACCTAATCTCTAATAATCTAAACAAATATTATTCCAATCCTCATTAC						cg	F	T	C	2	II	22	43892275	Human	GRCh38	CGTAATGAGGACTGGAATAACATCTGCCCAGACTACCAGAGATCAGGCAA	TGGGACCAAATCTTGCCTGATCTCTGGTAGTCTGGGCAGATGTTATTCCAGTCCTCATTA[CG]CAAATGAGGCAACTGAGGCGCAGCCCAGGATGGTGACAGCCAGGAAGTGGCAGAGTCGGA	TGGGACCAAATCTTGCCTGATCTCTGGTAGTCTGGGCAGATGTTATTCCAGTCCTCATTA[CG]CAAATGAGGCAACTGAGGCGCAGCCCAGGATGGTGACAGCCAGGAAGTGGCAGAGTCGGA	1	TSS1500;TSS1500;TSS1500	PNPLA5;PNPLA5;PNPLA5	NM_001371410.1;NM_138814.4;NM_001177675.2	chr22:43891617-43892181	S_Shore	TSS1500;TSS1500;TSS1500	ENSG00000100341.13;ENSG00000100341.13;ENSG00000100341.13	ENST00000216177.9;ENST00000381198.7;ENST00000438734.1					FALSE					Quies;ReprPC;Het;TssBiv;ReprPCWk;EnhBiv;TssFlnk;TxWk;EnhWk;TssFlnkD	623;599;164;136;86;25;12;13;4;1	cg03118854	cg03118854
cg03124636	cg03124636	-0.0200134	0.00433313	-4.6187	3.86144e-06	0.0210754	cg03124636_BC21	87639553	ACATAAATTAAAATAAATATTACRTACACATCTCCATCACCTAAAAAAAC						cg	F	B	C	2	II	6	30743649	Human	GRCh38	CATAAGTTAAAATAAATATTACGTACACATCTCCATCACCTAGGAGGACG	CTCACACCCTTGCATAAGTTAAAATAAATATTACGTACACATCTCCATCACCTAGGAGGA[CG]TACATAAATACATATAAATATTAATTAGGAGCAATAAGAAATAAATTAACGACGCTCTCC	GGAGAGCGTCGTTAATTTATTTCTTATTGCTCCTAATTAATATTTATATGTATTTATGTA[CG]TCCTCCTAGGTGATGGAGATGTGTACGTAATATTTATTTTAACTTATGCAAGGGTGTGAG	1	3UTR;exon_2;exon_2;TSS1500;TSS1500	IER3;IER3;IER3-AS1;FLOT1;FLOT1	NM_003897.4_6;NM_003897.4_6;NR_149095.1_6;NM_005803.4_8;NM_001318875.2_8	chr6:30742530-30744663	Island	exon_2;exon_1;3UTR;3UTR;TSS1500;TSS1500;TSS1500;TSS1500;TSS1500;TSS1500;TSS1500;TSS1500;TSS1500;TSS1500;TSS200	IER3;IER3;IER3;IER3;ENSG00000137312.15;ENSG00000137312.15;ENSG00000137312.15;ENSG00000137312.15;ENSG00000137312.15;ENSG00000137312.15;ENSG00000137312.15;ENSG00000137312.15;ENSG00000137312.15;ENSG00000137312.15;ENSG00000228022.6	ENST00000259874.6;ENST00000376377.2;ENST00000259874.6;ENST00000376377.2;ENST00000376389.8;ENST00000413165.5;ENST00000438162.5;ENST00000470643.5;ENST00000418160.5;ENST00000445853.5;ENST00000484168.1;ENST00000416018.5;ENST00000454845.1;ENST00000484693.1;ENST00000656751.1			6:30710361-30712511	Promoter_Associated	TRUE		EH38D5742540	EH38E3699996|Low-DNase;EH38E3699996|pELS;EH38E3699996|pELS/CTCF-bound	73;11;3	Quies;TssA;ReprPCWk;TssFlnkU;TxWk;EnhA1;EnhA2;TssBiv;TssFlnk;EnhWk;TssFlnkD;ReprPC;EnhG2	532;451;32;335;249;4;18;12;15;3;9;2;1	cg03124636
cg03135704	cg03135704	-0.022582	0.00492942	-4.58107	4.62611e-06	0.0235799	cg03135704_TC21	80738898	AACCTTCAAAAAAACCTTACTTCTAAAAACTAAATACCTAAAACTCCTTC						cg	R	T	C	2	II	11	5690879	Human	GRCh38	CGAAGGAGTCTTAGGTACTCAGTCTTCAGAAGTAAGGCCCTTTTGAAGGT	AGCAACCTCATGATGAGGTTCAGCAGGGATGAGAGCCCTTATCTGGATCTGGGTATGAGG[CG]AAGGAGTCTTAGGTACTCAGTCTTCAGAAGTAAGGCCCTTTTGAAGGTTATCCTTTTACT	AGTAAAAGGATAACCTTCAAAAGGGCCTTACTTCTGAAGACTGAGTACCTAAGACTCCTT[CG]CCTCATACCCAGATCCAGATAAGGGCTCTCATCCCTGCTGAACCTCATCATGAGGTTGCT	1						TSS200	ENSG00000132274.17	ENST00000414641.5					FALSE		EH38D4579299	EH38E2942044|DNase-only;EH38E2942044|Low-DNase;EH38E2942044|pELS	1;80;6	TxWk;TssA;TssFlnk;Tx;TssFlnkU;EnhA1;Quies;EnhA2;ReprPCWk;EnhWk;TssFlnkD;ReprPC	514;513;64;222;122;7;153;55;5;2;5;1
cg03146937	cg03146937	-0.0377089	0.00775517	-4.86242	1.15958e-06	0.00994248	cg03146937_TC21	26648230	TAAAACCTCRAAACAAACCACTCCCTCTACCTACAACTAAAATAAAAAAC						cg	F	T	C	2	II	11	13223367	Human	GRCh38	CGTTTTCCACCTCAGCTGCAGGCAGAGGGAGTGGCTTGTTTCGAGGTTCC	AACCAAGACCCTGGAACCTCGAAACAAGCCACTCCCTCTGCCTGCAGCTGAGGTGGAAAA[CG]TCCCAATGTTACCAGTAAAACGATTACATCTTTTACTCATATGTTTTTCTCCCTGTGTAT	AACCAAGACCCTGGAACCTCGAAACAAGCCACTCCCTCTGCCTGCAGCTGAGGTGGAAAA[CG]TCCCAATGTTACCAGTAAAACGATTACATCTTTTACTCATATGTTTTTCTCCCTGTGTAT	1									chr11:13223251-13223404				FALSE		EH38D4584806	EH38E2945893|dELS;EH38E2945893|Low-DNase	1;86	Het;Quies;ReprPCWk;EnhWk;TxWk;ZNF/Rpts;EnhA1;EnhA2;ReprPC	232;1208;55;94;19;39;11;4;1
cg03151025	cg03151025	-0.0207255	0.00433844	-4.77718	1.77773e-06	0.0129256	cg03151025_TC21	44736405	TTCATATATAACAATTACACAACCTAAACCCAATAAATCTACTAACATTC						cg	R	T	C	2	II	14	69614877	Human	GRCh38	CGAATGTCAGCAGATCCATTGGGCCCAGGTTGTGTAATTGCCATACATGA	CGTGGTTGTCTTTCCCCTCTAGTTCCCCATTTATTAAGAGACAATTCACACTTGCAGGCC[CG]AATGTCAGCAGATCCATTGGGCCCAGGTTGTGTAATTGCCATACATGAAGTGAGTTATTA	TAATAACTCACTTCATGTATGGCAATTACACAACCTGGGCCCAATGGATCTGCTGACATT[CG]GGCCTGCAAGTGTGAATTGTCTCTTAATAAATGGGGAACTAGAGGGGAAAGACAACCACG	1				chr14:69611600-69612360	S_Shelf				chr14:69614666-69614964				FALSE		EH38D2733434	EH38E1724737|dELS;EH38E1724737|DNase-only;EH38E1724737|Low-DNase	32;1;54	TxWk;EnhA2;Quies;TssFlnkU;EnhA1;Tx;TssFlnk;EnhWk;EnhG1;ReprPCWk;TssA;TssFlnkD	678;175;269;84;210;91;8;109;13;8;12;6
cg03162820	cg03162820	-0.038905	0.00900104	-4.32227	1.54429e-05	0.0486768	cg03162820_TC21	31610481	TACTAAATATCTAACTAATCAACAACAAAAATCAATACTAAACTCCCAAC						cg	F	T	C	2	II	10	23338384	Human	GRCh38	CGTTGGGAGCTCAGTATTGATCTCTGCTGTTGACTAGTTAGACACTCAGC	GCTACCACAGGTGCTGAGTGTCTAACTAGTCAACAGCAGAGATCAATACTGAGCTCCCAA[CG]TGGCAGCATGAACCACAGGGAATAGCCAGCCACCTAGCGACAGGTTGATAGCACTGAACT	GCTACCACAGGTGCTGAGTGTCTAACTAGTCAACAGCAGAGATCAATACTGAGCTCCCAA[CG]TGGCAGCATGAACCACAGGGAATAGCCAGCCACCTAGCGACAGGTTGATAGCACTGAACT	1													FALSE		EH38D4498990	EH38E2891020|CTCF-only/CTCF-bound;EH38E2891020|dELS/CTCF-bound;EH38E2891020|DNase-only;EH38E2891020|Low-DNase	11;2;1;73	Quies;TxWk;ReprPCWk;EnhA1;EnhWk;EnhA2;ReprPC;Het	1219;120;254;24;28;13;2;3
cg03170171	cg03170171	-0.0178894	0.0031223	-5.72956	1.00691e-08	0.000626587	cg03170171_BC21	51609377	TCAAACTAAATTCCTTAAAACCTCCRAAATAAAAAAATTCCAAAAAACAC						cg	F	B	C	2	II	19	17279159	Human	GRCh38	CAAACTGGGTTCCTTGGGACCTCCGGGGTGGGGGGGTTCCAGGAGGCACG	AGCCTTGGTTCTCAAACTGGGTTCCTTGGGACCTCCGGGGTGGGGGGGTTCCAGGAGGCA[CG]TAGGGTACCTTGCAGGGTCCTAGGAGGGAAACCCAGGATTCCAGGAGGGATCCCAGGAAC	GTTCCTGGGATCCCTCCTGGAATCCTGGGTTTCCCTCCTAGGACCCTGCAAGGTACCCTA[CG]TGCCTCCTGGAACCCCCCCACCCCGGAGGTCCCAAGGAACCCAGTTTGAGAACCAAGGCT	1	exon_9;3UTR;exon_9;3UTR;exon_6;3UTR;exon_9;3UTR	BABAM1;BABAM1;BABAM1;BABAM1;BABAM1;BABAM1;BABAM1;BABAM1	NM_001033549.3;NM_001033549.3;NM_001288756.2;NM_001288756.2;NM_001288757.2;NM_001288757.2;NM_014173.4;NM_014173.4	chr19:17281574-17282966	N_Shelf	exon_9;exon_9;exon_9;exon_6;exon_4;exon_3;3UTR;3UTR;3UTR;3UTR;5UTR;5UTR	BABAM1;BABAM1;BABAM1;BABAM1;BABAM1;BABAM1;BABAM1;BABAM1;BABAM1;BABAM1;BABAM1;BABAM1	ENST00000359435.8;ENST00000598188.6;ENST00000601043.5;ENST00000595632.5;ENST00000598567.1;ENST00000601232.1;ENST00000359435.8;ENST00000595632.5;ENST00000598188.6;ENST00000601043.5;ENST00000598567.1;ENST00000601232.1					FALSE					Tx;TxWk;EnhA1;Quies;EnhG1;EnhG2;EnhWk	1199;436;2;14;7;4;1	cg03170171
cg03173827	cg03173827	0.0446438	0.0101919	4.38031	1.18512e-05	0.041762	cg03173827_TC11	27753388	CACACAAAAAACCACTACAAACTAATTAACAAATATCTATCTCTCACCCA	99678465	CACACGAAAAACCACTACGAACTAATTAACGAATATCTATCTCTCACCCG	A	Red	R	cg	R	T	C	1	I	20	64057364	Human	GRCh38	CGGGTGAGAGACAGACACTCGCCAACCAGTCCGCAGTGGCTCCCCGTGTG	GAAACCGAACATTAACCGTAGCCCTAACGCGGCTGAGGGATCCAGGCCTTGCCTCTGGGC[CG]GGTGAGAGACAGACACTCGCCAACCAGTCCGCAGTGGCTCCCCGTGTGTGCGAGGCTCCC	GGGAGCCTCGCACACACGGGGAGCCACTGCGGACTGGTTGGCGAGTGTCTGTCTCTCACC[CG]GCCCAGAGGCAAGGCCTGGATCCCTCAGCCGCGTTAGGGCTACGGTTAATGTTCGGTTTC	1	5UTR;exon_1	TCEA2;TCEA2	NM_198723.2;NM_198723.2	chr20:64057198-64057525	Island	exon_1;5UTR	TCEA2;TCEA2	ENST00000361317.6;ENST00000361317.6			20:62688571-62689673	Unclassified	TRUE		EH38D5354496	EH38E3449709|DNase-only;EH38E3449709|Low-DNase;EH38E3449709|PLS	1;82;4	EnhA2;TxWk;TssA;EnhBiv;TssFlnkU;EnhA1;ReprPCWk;EnhWk;Quies;TssFlnkD;TssFlnk;TssBiv;ReprPC;EnhG1	79;97;17;75;47;180;66;122;36;20;10;54;29;1	cg03173827
cg03188000	cg03188000	-0.0399686	0.00878086	-4.55179	5.31909e-06	0.0255437	cg03188000_BC21	75653421	ATACAAAAACTCCTTATCAAAAACTAAACTAATACATATAAAAACCAACC						cg	F	B	C	2	II	12	68241133	Human	GRCh38	TGCAAAGACTCCTTGTCAGGAGCTAGACTGGTGCATGTGAGGACCAGCCG	GAAAACAGCCAGTGCAAAGACTCCTTGTCAGGAGCTAGACTGGTGCATGTGAGGACCAGC[CG]GTAGGCCTTGTGACTGCAGCAGAGAGCTCAAGGGAAGGGTGATAGCAGATGAGACTGCAG	CTGCAGTCTCATCTGCTATCACCCTTCCCTTGAGCTCTCTGCTGCAGTCACAAGGCCTAC[CG]GCTGGTCCTCACATGCACCAGTCTAGCTCCTGACAAGGAGTCTTTGCACTGGCTGTTTTC	1											12:68634777-68635187	Unclassified	TRUE		EH38D4705499	EH38E3025583|dELS;EH38E3025583|dELS/CTCF-bound;EH38E3025583|DNase-only;EH38E3025583|Low-DNase	8;1;3;75	Quies;EnhA1;TxWk;EnhA2;TssFlnkD;EnhWk;ReprPCWk;TssFlnkU;TssA;TssFlnk;Het	1204;178;51;61;9;107;29;16;3;3;2	cg03188000
cg03190267	cg03190267	-0.0305026	0.00663457	-4.59753	4.27532e-06	0.022599	cg03190267_TC21	75640849	CTAAAAACACCTACCATAATCCTTCTTACAAAACTTCTTTAAACTAATAC						cg	R	T	C	2	II	16	2473467	Human	GRCh38	CGCATCAGCCTAAAGAAGTTCTGCAAGAAGGACTATGGTAGGTGCCCTCA	CAGCCTCCCACCTTCTACCCAGACTGTGACTCGCACTGCAAACCTGCCCGTGGCAGCTAC[CG]CATCAGCCTAAAGAAGTTCTGCAAGAAGGACTATGGTAGGTGCCCTCAGGCCTCCCGCGG	CCGCGGGAGGCCTGAGGGCACCTACCATAGTCCTTCTTGCAGAACTTCTTTAGGCTGATG[CG]GTAGCTGCCACGGGCAGGTTTGCAGTGCGAGTCACAGTCTGGGTAGAAGGTGGGAGGCTG	1	exon_5	NTN3	NM_006181.3	chr16:2471085-2475928	Island	exon_5	NTN3	ENST00000293973.2					FALSE		EH38D4918285	EH38E3163285|DNase-H3K4me3;EH38E3163285|DNase-H3K4me3/CTCF-bound;EH38E3163285|DNase-only;EH38E3163285|Low-DNase;EH38E3163285|pELS	8;1;1;75;2	EnhWk;TxWk;TssBiv;Quies;EnhBiv;ReprPCWk;TssFlnkD;TssFlnkU;ReprPC;TssFlnk;EnhA2;EnhA1	113;105;456;605;100;108;95;16;23;27;7;8	cg03190267
cg03192619	cg03192619	-0.0122417	0.00271402	-4.51056	6.46566e-06	0.0290062	cg03192619_TC21	97769577	TTTCTCTATTCAAACCCTAACCTAAAAAACTAAAAACATCCATAAACACC						cg	F	T	C	2	II	19	17719163	Human	GRCh38	CGGTGCCTATGGATGCTCCCAGCTCTCTAGGTCAGGGCTTGAACAGAGAA	GATAGATTTCTTTTCTCTGTTCAAGCCCTGACCTAGAGAGCTGGGAGCATCCATAGGCAC[CG]GGTTCTGATGCGGCCTACTGTCATGTGATGTGAGTTCCTGGAGGGCAGGAGTTCTGACCT	GATAGATTTCTTTTCTCTGTTCAAGCCCTGACCTAGAGAGCTGGGAGCATCCATAGGCAC[CG]GGTTCTGATGCGGCCTACTGTCATGTGATGTGAGTTCCTGGAGGGCAGGAGTTCTGACCT	1	TSS1500;TSS1500	MAP1S;MAP1S	NM_001308363.2;NM_018174.6	chr19:17719295-17719837	N_Shore	TSS200;TSS1500;TSS1500;TSS1500;TSS1500;TSS1500;TSS1500;TSS1500;TSS1500;TSS1500;TSS1500;TSS1500;TSS1500;TSS1500;TSS1500;TSS1500	ENSG00000130479.11;ENSG00000130479.11;ENSG00000130479.11;ENSG00000130479.11;ENSG00000130479.11;ENSG00000130479.11;ENSG00000130479.11;ENSG00000130479.11;ENSG00000130479.11;ENSG00000130479.11;ENSG00000130479.11;ENSG00000130479.11;ENSG00000130479.11;ENSG00000130479.11;ENSG00000130479.11;ENSG00000130479.11	ENST00000594625.5;ENST00000600608.5;ENST00000600186.5;ENST00000594212.5;ENST00000597735.5;ENST00000324096.9;ENST00000601544.5;ENST00000597681.1;ENST00000594340.5;ENST00000597067.5;ENST00000599494.5;ENST00000544059.2;ENST00000594365.5;ENST00000593593.5;ENST00000596637.5;ENST00000595338.5					FALSE		EH38D5117259	EH38E3295286|DNase-H3K4me3;EH38E3295286|Low-DNase;EH38E3295286|pELS	8;60;19	Quies;TxWk;TssFlnkD;TssFlnkU;ReprPCWk;TssFlnk;TssA;EnhA1;EnhA2;EnhWk;Het	513;76;339;286;256;112;19;13;7;41;1	cg03192619
cg03195195	cg03195195	-0.0384657	0.00830591	-4.63113	3.63678e-06	0.020446	cg03195195_BC21	19744961	TCTACCCCACAAAATTTCTACCAAATAATCAATAACACTCTAAATTAAAC						cg	R	B	C	2	II	11	64665467	Human	GRCh38	CTGCCCCACAGGGTTTCTACCAGGTGGTCAGTAACACTCTAGGTTGGACG	GCACTTCCTGAAAGCACAGAGAAGTGGAAGCCCTGCAGTGCCCTGCAAGGCTTGGGCAGA[CG]TCCAACCTAGAGTGTTACTGACCACCTGGTAGAAACCCTGTGGGGCAGAGGGCTCTGGGA	GCACTTCCTGAAAGCACAGAGAAGTGGAAGCCCTGCAGTGCCCTGCAAGGCTTGGGCAGA[CG]TCCAACCTAGAGTGTTACTGACCACCTGGTAGAAACCCTGTGGGGCAGAGGGCTCTGGGA	1													FALSE		EH38D4612016			Tx;ReprPCWk;Quies;EnhWk;TxWk;EnhA1;Het;EnhG1;ReprPC;EnhA2;TssFlnkU;EnhBiv;TssFlnkD	702;385;326;76;134;13;2;13;2;6;2;1;1
cg03198066	cg03198066	-0.0330586	0.00663506	-4.98241	6.27965e-07	0.00697628	cg03198066_BC21	73746844	AACCCCCACTTTACRTAATTTTCCTACACTTCTACAAATAATCTTACCTC						cg	R	B	C	2	II	2	158454556	Human	GRCh38	GCCCCCACTTTACGTGGTTTTCCTGCACTTCTGCAAATGATCTTGCCTCG	AGGACTGAGGTTTAAGAAAGTTAAGTTGAGGAACCTCATGGTGGATCCTTCAGTAGAGTA[CG]AGGCAAGATCATTTGCAGAAGTGCAGGAAAACCACGTAAAGTGGGGGCTTCAGGAGAGCA	AGGACTGAGGTTTAAGAAAGTTAAGTTGAGGAACCTCATGGTGGATCCTTCAGTAGAGTA[CG]AGGCAAGATCATTTGCAGAAGTGCAGGAAAACCACGTAAAGTGGGGGCTTCAGGAGAGCA	1				chr2:158456660-158458301	N_Shelf								FALSE					ReprPCWk;Quies;ReprPC;EnhWk;EnhBiv;TssFlnk;TxWk;TssBiv	424;1042;172;6;5;2;9;3	cg03198066
cg03203621	cg03203621	-0.0214022	0.00475631	-4.49975	6.80341e-06	0.0299388	cg03203621_TC21	76712967	CAAAATCCRATTCTTTAACCTTTAAACTCTTAAATTTACACCAACRATTC						cg	F	T	C	2	II	2	229300057	Human	GRCh38	CGAACCGCTGGTGTAAATCCAAGAGTTCAAAGGCCAAAGAACCGGATTCT	CCCCTGAACATCAGAATCCGGTTCTTTGGCCTTTGAACTCTTGGATTTACACCAGCGGTT[CG]CCAGGGGCTCTTGGGCCTTTGCCCACAGACTGAAGGCTGCACTGTCGGCTTCCCTACTTT	CCCCTGAACATCAGAATCCGGTTCTTTGGCCTTTGAACTCTTGGATTTACACCAGCGGTT[CG]CCAGGGGCTCTTGGGCCTTTGCCCACAGACTGAAGGCTGCACTGTCGGCTTCCCTACTTT	1									chr2:229299693-229300132				FALSE					Quies;TxWk;EnhWk;EnhA2;Het;ReprPCWk;EnhA1	1549;55;15;16;19;4;5
cg03222361	cg03222361	-0.0529465	0.0112063	-4.72471	2.30442e-06	0.0153982	cg03222361_BC21	43754336	TAAAATACTTAAATAACRTAACACAACATAAAACCATCTCCTAAATAACC						cg	F	B	C	2	II	15	32104754	Human	GRCh38	GAGGTGCTTGGGTAGCGTGACACAACATAAAGCCATCTCCTGAATGGCCG	AAGGTGAACCTTGAGGTGCTTGGGTAGCGTGACACAACATAAAGCCATCTCCTGAATGGC[CG]TGCAGCACTTTCGTACTGTGTGTATAAGGCCAGGCTCCGGAGAATGAGGCAAGTGCTTCC	GGAAGCACTTGCCTCATTCTCCGGAGCCTGGCCTTATACACACAGTACGAAAGTGCTGCA[CG]GCCATTCAGGAGATGGCTTTATGTTGTGTCACGCTACCCAAGCACCTCAAGGTTCACCTT	1													FALSE		EH38D2772976	EH38E1751256|CTCF-only/CTCF-bound;EH38E1751256|Low-DNase	2;85	Quies;ReprPCWk;EnhWk;EnhA1;EnhA2;TxWk;Het;ZNF/Rpts;TssFlnkD;ReprPC	1322;164;19;15;8;41;81;6;5;2
cg03237261	cg03237261	0.0910111	0.0187521	4.85338	1.21373e-06	0.0100855	cg03237261_BC21	90758113	ACAAACTCAAATAAAAATAAACAATTAAACATCCAATAATCATTTCTTCC						cg	R	B	C	2	II	11	30085774	Human	GRCh38	CAAACTCAAATGAAAATAAACAGTTGAGCATCCAATAATCATTTCTTCCG	TATAAATATATGTATATATACACACGTATGTAAATATAAACATATTTACATATATGTTTT[CG]GAAGAAATGATTATTGGATGCTCAACTGTTTATTTTCATTTGAGTTTGTTTTTATTATAA	TATAAATATATGTATATATACACACGTATGTAAATATAAACATATTTACATATATGTTTT[CG]GAAGAAATGATTATTGGATGCTCAACTGTTTATTTTCATTTGAGTTTGTTTTTATTATAA	1						TSS1500	ENSG00000254532.2	ENST00000527819.1					FALSE					Quies;Het;ReprPCWk	1602;53;8
cg03237342	cg03237342	-0.0529138	0.0109598	-4.82798	1.37927e-06	0.01099	cg03237342_BC21	83706982	CAAATAAAAACATTCCACATAACCAAACCAATCAATCACCTCRATAAAAC						cg	R	B	C	2	II	15	57133559	Human	GRCh38	AGATGGGAACATTCCACATGACCAAACCAATCAATCACCTCGGTGGGGCG	ATGTGTTTGTGCCCGATAGACTGTGAAATGGTGTGTTGCTACACGGCTGTGTTGCACCTG[CG]CCCCACCGAGGTGATTGATTGGTTTGGTCATGTGGAATGTTCCCATCTGGTCTGCAGTAA	ATGTGTTTGTGCCCGATAGACTGTGAAATGGTGTGTTGCTACACGGCTGTGTTGCACCTG[CG]CCCCACCGAGGTGATTGATTGGTTTGGTCATGTGGAATGTTCCCATCTGGTCTGCAGTAA	1						TSS1500	ENSG00000140262.18	ENST00000560887.1					FALSE		EH38D2792363	EH38E1764508|dELS;EH38E1764508|DNase-only;EH38E1764508|Low-DNase	4;5;78	Quies;EnhA2;EnhWk;EnhA1;TxWk;Het;TssFlnkU;ReprPCWk;TssFlnkD;TssFlnk;EnhG1;Tx;ZNF/Rpts	1119;22;279;123;80;8;14;4;8;1;3;1;1
cg03241448	cg03241448	-0.0340916	0.00726957	-4.68963	2.73705e-06	0.0170517	cg03241448_BC21	33700386	TAAACRAATCACCATAAATAACAATCCCRACTATAATTAAAATTAACCCC						cg	R	B	C	2	II	11	64858619	Human	GRCh38	AGACGAGTCACCATGAGTGACAGTCCCGGCTGTGGTTGGGGTTGACCCCG	AAATGTGGGCTTGGTCACTTCTCAGCTGTTCAGACAATCTGTGTCAAACACTCCTGTCCA[CG]GGGTCAACCCCAACCACAGCCGGGACTGTCACTCATGGTGACTCGTCTAGGCTGGCTCAC	AAATGTGGGCTTGGTCACTTCTCAGCTGTTCAGACAATCTGTGTCAAACACTCCTGTCCA[CG]GGGTCAACCCCAACCACAGCCGGGACTGTCACTCATGGTGACTCGTCTAGGCTGGCTCAC	1				chr11:64853735-64854774	S_Shelf				chr11:64858526-64858982				FALSE		EH38D4612389	EH38E2963642|dELS;EH38E2963642|Low-DNase	37;50	TxWk;EnhG1;Tx;TssFlnkU;EnhA1;EnhA2;EnhG2;TssA;Quies;EnhWk	909;155;183;14;90;74;194;1;31;12
[truncated: 2,878 more rows]
[truncated: 7 more columns]

## Sheet: 2B
Name	probe	TE_fixed	seTE_fixed	zval_fixed	pval_fixed	IlmnID	AddressA_ID	AlleleA_ProbeSeq	AddressB_ID	AlleleB_ProbeSeq	Next_Base	Color_Channel	col	Probe_Type	Strand_FR	Strand_TB	Strand_CO	Infinium_Design	Infinium_Design_Type	CHR	MAPINFO	Species	Genome_Build	Source_Seq	Forward_Sequence	Top_Sequence	Rep_Num	UCSC_RefGene_Group	UCSC_RefGene_Name	UCSC_RefGene_Accession	UCSC_CpG_Islands_Name	Relation_to_UCSC_CpG_Island	GencodeV41_Group	GencodeV41_Name	GencodeV41_Accession	Phantom5_Enhancers	HMM_Island	Regulatory_Feature_Name	Regulatory_Feature_Group	450k_Enhancer	DMR	DNase_Hypersensitivity_NAME	Encode_CisReg_Site	Encode_CisReg_Site_Evid	OpenChromatin_NAME	OpenChromatin_Evidence_Count	Methyl450_Loci	Methyl27_Loci	EPICv1_Loci
[truncated: 142 more rows]
[truncated: 6 more columns]

## Sheet: 2C
Name	probe	TE_fixed	seTE_fixed	zval_fixed	pval_fixed	pval_adj	IlmnID	AddressA_ID	AlleleA_ProbeSeq	AddressB_ID	AlleleB_ProbeSeq	Next_Base	Color_Channel	col	Probe_Type	Strand_FR	Strand_TB	Strand_CO	Infinium_Design	Infinium_Design_Type	CHR	MAPINFO	Species	Genome_Build	Source_Seq	Forward_Sequence	Top_Sequence	Rep_Num	UCSC_RefGene_Group	UCSC_RefGene_Name	UCSC_RefGene_Accession	UCSC_CpG_Islands_Name	Relation_to_UCSC_CpG_Island	GencodeV41_Group	GencodeV41_Name	GencodeV41_Accession	Phantom5_Enhancers	HMM_Island	Regulatory_Feature_Name	Regulatory_Feature_Group	450k_Enhancer	DMR	DNase_Hypersensitivity_NAME	Encode_CisReg_Site	Encode_CisReg_Site_Evid	OpenChromatin_NAME	OpenChromatin_Evidence_Count	Methyl450_Loci	Methyl27_Loci
[truncated: 27,328 more rows]
[truncated: 7 more columns]

[truncated: 1 more sheets: 2D]
