# Supplementary material for: Identification of an episignature for CHD3-related Snijders Blok-Campeau syndrome reveals heterogeneity in the CHARGE syndrome episignature: towards a better characterization of chromatinopathies.
Source: Research Square preprint supplement (doi:10.21203/rs.3.rs-6706576/v1), 2025-05-26
Supplement: Supplementary file 2 [file 456ed25faa1c08b4e2bfb526.xlsx]

## Sheet: Sheet1
sample	from	Mutation ENST00000330494.12	Domain	Phenotype	Column 1	Class	Inheritance	Sex	EPIC	BCS vs VUS	EPIC ID		Age at sampling (years)	Epiclock (skinHorvath)	localization	Birth OFC (cm)/ (SD)	Age (years) at last examination	Height (m)/(SD) at last evaluation	OFC (cm)/(SD) at last evaluation	Early developmental delay	Intellectual Disability (Normal/Mild/Moderate/Severe)	Speech at last examination	Ongoing treatment at sampling time
ST67	FR	R39W		Mild	NM_001005273.3:c.115C>T	3	NA		V2	VUS	208369620053_R05C01		14.25	8.2	unfolded domain	NA	NA	NA	NA	NA	NA	NA	NA
ST74	FR	K69Rfs*72		Moderate	NM_001005273.3:c.204del	4_5	Father	M	V2	typical	207854440015_R03C01		9.92	4.19	unfolded domain	NA	NA	NA	NA	NA	NA	NA	NA
ST76	FR	Y156X	CHDNT	Mild	NM_001005273.3:c.468C>A	4	de novo	M	V2	typical	207854440015_R05C01		8	5.68	alpha helix	34 (-0.8 SD)	18	177.5	53 at 7.5 years old (+0.5 SD)	no stand at 9	Mild	Poor	no
ST79	CH	A241Pfs*54		Severe	NM_001005273.3:c.720del	5	de novo	M	V2	typical	208418690101_R03C01		13	6.83	unfolded domain	35 cm (-0.7 to -1.3 SD)	10	1.438 m (0.63 SD)	58.8 (+3.38 SD)	yes	Moderate	Poor	NA
ST73	FR	E375X		Mild	NM_001005273.3:c.1123G>T	4_5	Mother	F	V2	typical	207854440015_R02C01		6.58	3.2	unfolded domain	33	NA	116	NA	No	No	Normal	NA
ST53	ES	V555I	Chromo1	Mild	NM_001005273.3:c.1663G>A	3	Mother	F	V2	VUS	208369620053_R01C01		5.25	2.86	turn	NA	4	1.067 (-0.27 SD)	50.2 (-0.09 SD)	no	Mild	Poor	NA
ST83	DE	Y621X		NA	NM_001005273.3:c.1863C>G	4	NA	F	V2	NA	208369620116_R01C01		2	2.56	alpha helix	NA	NA	NA	NA	NA	NA	NA	NA
ST72	FR	R635C	Chromo2	Moderate	NM_001005273.3:c.1903C>T	3	NA		V2	VUS	208369620097_R03C01		8.75	4.2	beta sheet	NA	NA	NA	NA	NA	NA	NA	NA
ST56	FR	T768A	Helicase	Mild	NM_001005273.3:c.2302A>G	4	de novo	F	V2	atypical	207851030006_R05C01		0.01	-0.31	alpha helix - active site	36,5 cm (+2.04 SD)	13	1.47 (-1,16 SD)	57.5 (+2,50 SD)	yes	No	Normal	NA
ST82	DE	R802W	Helicase	Moderate	NM_001005273.3:c.2404C>T	4	de novo	F	V2	typical	208369620098_R04C01		2.75	0.48	alpha helix - active site	NA	3.7	NA	mild macrocephaly (no measurements available)	yes	Moderate	Poor	NA
ST89	BE	L888F	Helicase	Mild	NM_001005273.3:c.2662C>T	4_5	de novo	F		typical	NA		NA	NA	alpha helix	NA	NA	NA	NA	NA	NA	NA	NA
ST90	BE	L888F	Helicase	Mild	NM_001005273.3:c.2662C>T	4_5	Mother	F	V2	typical	208369620098_R07C01	208418690135_R06C01	5 (ST90A), 0.67 (ST90B)	4.59 (ST90A), 0.19 (ST90B	alpha helix	37 cm (+1.9 SD)	11	1.44 (-0.5 DS)	55 (+1.7 SD)	yes	No	Normal	NA
ST66	FR	R966W	Helicase	Severe	NM_001005273.3:c.2896C>T	4_5	de novo	M	V2	typical	207851030006_R07C01		1.58	0.54	loop	34	10	136	52.5	Yes	Mild	Poor	NA
ST98	FR	R966G	Helicase	Mild	NM_001005273.3:c.2897G>A	5	de novo	M	V2	typical	208418690099_R05C01		5.75	2.11	loop	NA	5.75	0.90 (-0.5 SD)	50 (mean)	yes	Moderate	Poor	NA
ST77	FR	I983V		Moderate	NM_001005273.3:c.2947A>G	4	de novo	M	V2	typical	207854440015_R06C01		0.92	0.09	beta sheet	normal	7.5	1.39 (+3 SD)	55 (+1.9 SD)	sitting 11-12 mo, walking 23 mo, severe speech trouble, moderate language delay	Mild	NA	NA
ST15	FR	R985W		Severe	NM_001005273.3:c.2953C>T	5	de novo	M	V1	typical	207127940067_R07C01		7	4.02	beta sheet	36	14	1.75 (+ 2.5 SD)	58,8 (+ 3 SD)	hypotonia, walk at 3, words at 4	Mild	Poor	NA
ST5	FR	R1169W	Helicase C	Severe	NM_001005273.3:c.3505C>T	4	de novo	M	V1	typical	207127940069_R05C01		1.08	0.34	active site	36,5	5.5	1.115 (M)	52 (+0,2 DS)	yes	Severe	Absent	NA
ST49	RO	R1169W	Helicase C	Severe	NM_001005273.3:c.3505C>T	4	de novo	M	V2	typical	207851030006_R04C01		0.84	0.026	active site	36	1.2	0.79	48 (+1,8 SD)	yes	Moderate	young child age 1 y	no
ST64	HR	R1172Q	Helicase C	Severe	NM_001005273.3:c.3515G>A	4	de novo	M	V2	typical	207851030006_R06C01		0.75	-0.008	active site	NA	10.2	1.39 (M)	56,5 (+2.2 SD)	Yes	Mild	Poor	Valproic acid
ST75	PT	R1172Q	Helicase C	Moderate	NM_001005273.3:c.3515G>A	4	NA	M	V2	typical	207854440015_R04C01		17	9.01	active site	36,5 (+2 SD)	21	172	59.7	Developmental delay, mostly motor	Mild	Poor	no
ST78	FR	R1172Q	Helicase C	Severe	NM_001005273.3:c.3515G>A	4_5	de novo	F	V2	atypical	208369620097_R07C01		0.02	-0.35	active site	36 (+1,3)	8.7	1.38 (+1.29 SD)	52.5 (M)	YES	Moderate	Normal	NA
ST47	NL	R1187H	Helicase C	Severe	NM_001005273.3:c.3560G>A	4	de novo	M	V1	typical	207127940147_R05C01		0.66	0.42	turn	NA	6	1.296 (+1.62 SD)	57 (+3.06 SD)	yes	Mild	Poor	NA
ST46	NL	V1456X	DUF	Severe	NM_001005273.3:c.4367_4382del	4	NA	M	V1	typical	207127940147_R01C01		40.7	40.2	alpha helix	NA	48	1.7	59 (+2.72 SD)	always delayed, has a right sided hemiparesis	severe	can says some words	NA
ST70	FR	D1671Ffs*10		Moderate	NM_001005273.3:c.5007_5008del	4_5	Father	M	V2	typical	207851030006_R08C01		1	0.14	unfolded domain	37 (+2 SD)	6	1.18	53.3 (+1.26 SD)	yes	Mild	Normal	NA
ST71	FR	D1671Ffs*10		Severe	NM_001005273.3:c.5007_5008del	4_5	Mother	F	V2	typical	207854440015_R01C01		12.3	4.52	unfolded domain	NA	NA	NA	NA	NA	NA	NA	NA
ST81.1	DE	D1671Ffs*10		Severe	NM_001005273.3:c.5007_5008del	4_5	mother	M	V2	typical	208369620098_R02C01		5	2.58	unfolded domain	36cm (0.98 SD)	5.33	1.088 (-1.16 SD)	50.4 (-1.14 SD)	yes	Moderate	Poor	NA
ST81.2	DE	D1671Ffs*10		Mild	NM_001005273.3:c.5007_5008del	4_5	NA	F	V2	typical	208369620116_R06C01		43	41	unfolded domain	NA	42	NA	NA	yes	Mild	Normal	NA
ST69	FR	S1733L		Mild	NM_001005273.3:c.5198C>T	3	NA		V2	VUS	208418690082_R05C01		8	4.36	alpha helix	NA	NA	NA	NA	NA	NA	NA	NA
ST68	FR	R1881C	CHDCT2	Mild	NM_001005273.3:c.5641C>T	3	Father		V2	VUS	208369620053_R03C01		4.5	2.35	alpha helix	NA	NA	NA	NA	NA	NA	NA	NA
ST80	CH	P1918=		Mild	NM_001005273.3:c.5754G>A	4	de novo	F	V2	atypical	208418690137_R04C01		16	8.04	unfolded domain	NA	17	1.48 (-2.24 SD)	53 (-1.71 SD)	no	No	Normal	NA
