# Supplementary material for: Identification of an episignature for CHD3-related Snijders Blok-Campeau syndrome reveals heterogeneity in the CHARGE syndrome episignature: towards a better characterization of chromatinopathies.
Source: Research Square preprint supplement (doi:10.21203/rs.3.rs-6706576/v1), 2025-05-26
Supplement: Supplementary file 3 [file 5a58c1f8e5afbd6dd13ad3c9.xlsx]

## Sheet: Sheet1
	Patient				infos ajoutées 4/02				infos ajoutées 4/02	infos ajoutées 23/01	infos ajoutées 23/01	infos ajoutées 4/02	(infos données en bas de tableau)
medical doctor	Pauline Marzin	Pauline Marzin	Pauline Marzin	Dr Godeliève Morel/ Dr Paul ROLLIER	Dr Anne-Marie Guerrot	Dr Nicolas Chatron	Dr Florence Demurger	Dr Bertrand Isidor	Dr Alice Goldenberg	Dr Julian Delanne	Pr Laurence Olivier-Faivre	Dr Anne-Marie Guerrot	Dr Bertrand Isidor	Dr Nicolas Chatron
Code	ST6	ST7	ST8	CHARGE_4	CHARGE_6	CHARGE_10	CHARGE_7	CHARGE_8	CHARGE_1	CHARGE_2	CHARGE_3	CHARGE_5	CHARGE_9	CHARGE_11
Episignature class	epi-strong	epi-strong	epi-strong	epi-strong	epi-strong	epi-strong	epi-strong*	epi-strong*	epi-mild	epi-mild	epi-mild	epi-mild	epi-mild	epi-mild
Phenotypic class (moderate, severe)	severe	severe	severe	severe	severe	NA	Moderate		mild	severe	mild	mild		Mild
Age at sampling (in days or months)	J2	J17	J24	J18	10d	J22	12 mois	7 mois	12 mois	8 months	9 years	18 mois	25y	3 ans
Situation at the time of sampling (in good health, presenting heath issues, hospitalized, in intensive care,….)	reanimation neonatale (hypoxie néonatale)	hospitalisé en PG, difficulté respiratoire lié à la cardiopathie	hospitalisé en soins intensif de neonat	Hospitalisé en soins intensifs néonatal	presenting heath issues				in good health	presenting heath issues	presenting heath issues	in good health
Age at clinical diagnosis	J2	J17	J24	Diagnostic fait par WGS (FastGen), vers 3 mois de vie	1m			diag évoqué à 15mois	2,5y	4 months	9 years	2y	26y
if deceased, age at death (in days, months or years)	J9	na	J37
Sex	F	M	M	F	M	F	F	F	F	M	M	M	F	F
Genetic
Mutation NM_017780.4	c.4353+1 G>A	c.481 C>T	c.1223del	c.469C>T	c.3655C>T	c.2959C>T	c.6850C>T	c.7252C>T	c.2504_2508del	c.963dup	c.5405G>A	c.5301-14A>G	c.2219A>G	c.7123del
NP_060250.2	p.?	p.Gln161*	p.Thr408IleFs*55	p.(Arg157*)	p.(Arg1219*)	p.(Arg987*)	p.(Arg2284*)	p.(Arg2418*)	p.(Tyr835Serfs*14)	p.(Leu322Ilefs*3)	p.(Gly1802Asp)	p.?	p.(Asp740Gly)	p.(Ser2375Valfs*68)
ACMG variant classification				5	5	5	5	5	5	5	4	5	4	5
inheritance	de novo	de novo	de novo		de novo			mère pas porteuse	de novo	de novo	not maternal	de novo	inconnue
neurologic findings
hypotonia	na	yes	no	Hypotonie axiale et périphérique				y	non	axial hypotonia (from birth)	no	non	nd
developmental delay	na	severe	na	Marche à 3 ans	oui		oui, assez severe	y	non	yes	yes	non	y
speech delay	na	yes	na	3 ans : communicante mais non sonore (mais surdité profonde)	-		oui	y	non	Yes	yes	non	y
intellectual disability (severe, moderate, mild)	na	na	na	Trop jeune pour tests QI	normal ID		trop jeune	severe	normal ID	severe	mild	normal ID	mild
autistic features	na	na	na	non				no	non	no	no		no
seizure	na	no	na	EEG: anomalies aspécifiques. Pas de convulsions.			non	no	non (mais migraine depuis l'enfance)	no	no	non	no
eyes abnomalities	na	coloboma	coloboma	hypermétropie	colobome papillaire unilatéral droit et amblyopie			no	colobome papillaire gauche, acuité résiduelle inférieure à 1/10ème	coloboma	coloboma, amblyopia	non	no
brain MRI (if abnormal, please detailled)	pontocerebellar hypoplasia, facial nerve agenesis,	cerebellar hypoplasia	cerebellar dysplasia	corps calleux assez fin, dilatation ventriculaire gauche	Agnésie des bubles olfactifs et des sillons olfactifs associé à une méga citerne, agnésie des canaux semi circulaires			oui dysplasie corticale posterieure droite	normal	Brain MRI: septal agenesis.	abnormal: Multiple round supratentorial lesions in T2 hyposignal suggestive of multiple cavernomas	normal	nd
Congenital defect					hydramniose, prématurité à 36 SA				non	ENT MRI: left internal auditory canal narrowing, left cochleovestibular nerve filiform compared to right side. Cannot be followed beyond the ostium of the IAC
congenital heart defect	atent ductus arteriosus, Atrial septal defect, atrioventricular asymetry	atrio ventricular defect	inter ventricular defect, transposition ds gros vaisseaux	canal artériel largement ouvert, CIV périmembraneuse avec un shunt gauche droit peu restrictif, CIA large	Veine cave supérieure gauche se drainant dans un sinus coronaire dilaté		Coarctation aorte, CA, large communication inter auricualaire , chir 2mois	yes large CIA	non	Ebstein's disease of	aortic arch pathology, Stenosis of the left pulmoanal artery	non	no
Choanal atresia	yes	yes	no	non	atrésie des choanes membraneuse bilatérale			no	non	with small right ventricle	no	non	no
gastrointestinal defect	no	horse kidneys	no	5 mois : mauvaise prise alimentaire, fausses routes importantes et régurgitations après chaque repas. RGO confirmé par TOGD. Echographie abdominale normale. Alimentation entérale sur SNG quasi exclusive. Pose de gastrostomie par la suite	trouble de la déglutition sévère nécessitant une trachéotomie			no	non	Gastrostomy until 3 years of age due to orality disorder, normal feeding at 5 years of age.	no	non	no
genitalia abnormalities	no	no	no	non rapporté	organes génitaux hypoplasiques		rein fer a cheval	no	non	Malrotation on incomplete common mesentery	delayed puberty: G1 P2 A1 with an estimated testicular volume between 1 and 2 ml, i.e. hypotrophic	non	noo
dysmorphism
typical facial CHARGE dysmorphism	yes	yes	yes	Diagnostic non fait sur les traits morphologiques				? Pas évidente		Flat nose, small ears, low set, dysplastic	There are oblique, outwardly sloping palpebral clefts, slight facial asymmetry, thick eyebrows, small, round, very hemmed, low-set ears, a narrow palate, a flat tip of the nose and a rather elongated face.	visage carré et asymétrie du visagea, racine du nez large, pas d'anomalie dentaires, pas d'anomalies de la bouche	no
if not, explain why				Discrète impression de dysmétrie faciale.									oreilles petites,mal ourlées/seule anomalie notée
Inner ear abnormality/ hearing loss	yes	yes	yes	Surdité profonde à droite, sévère à gauche ; appareillée	surdité profonde bilatérale; agnésie des canaux semi circulaires		oui	yes,left side,severe	surdité bilatérale/ rétraction tympanique gauche	Cochlear implant on the right	Bilateral tympanosclerosis, with bilateral agenesis of the semicircular canals. There is atresia of the cochlear opening on the left. Left middle deafness	surdité de perception unilatérale gauche / hypoplasie du canal du nerf cochléaire gauche + malformation labyrinthique postérieure bilatérale avec agnésie quasi complète des canaux semi-circulaires.	oui/oui profonde bilatérale
External ear malformation/ cup-shaped ears	yes	yes	yes	Oreilles dysplasiques (de petite taille, sans lobules, mal ourlées)	oreilles asymétriques, pavillon peu carré et des conches triangulaire			yes	petites oreilles rondes	Probable bilateral deep sweat	small, round, deeply hemmed, low-set ears	oui	oui
Cleft lip/palate	no	no	no	non				no	fente labiopalatine bilatérale totale, hypoplasie mandibulaire	Bilateral inner ear malformation with poorly coiled cochleae and severe hypoplasia of the semicircular canals and vestibule.	no	non	no
Skeletal
microcephaly	no	-2	yes	PC -2 DS				yes -2DS	non	no	no	non	no 56
growth retardation	no	-2	na	P <1er p ; T << -3DS	oui, -2DS		oui, -2,5	yes -3ds	oui -2DS	yes	no	non	1m55/70kg
scoliosis	na	no	na	non				no	malformation vertébrale et scapulaire	no	no	non	no
Immune anomalies									à priori non			non
Thymic hypoplasia or aplasia	no	no	yes	non rapporté				nd		no know	no know		nd
T cell defect, mild to severe	na	na	na	non cherché				nd		no	no		nd
Lymphopenia	no	no	yes	non				no		no	no		nd
Other									troubles de l'équilibre			troubles de l'équilibre
Endocrine features	na	no	neonatal hypocalcemia	non rapporté				no		midline syndrome, panhypopituitarism: gonadotropic, somatotropic, thyrotropic, corticotropic deficiencies	probable hypogonadism		nd
Réponses par mail	VSI dans le gène EFTUD2, c.1954G>A (p.(Asp652Asn)) à l'état hétérozygote. Ce variant est également survenu de novo.					22A1233 a été vu la dernière fois à l’âge de 18 mois et il est donc difficile de trancher sur la sévérité du trouble neurodéveloppemental	coarctation aorte, agénésie bulbes olfactifs, rein en fer à cheval, hypotonie			commence tout juste à 5 ans à faire qq pas avec aide	DI légère		DI /scolarisée en IME/travaille en ESAT/surdité bilatérale/1m55/70kg/PC 56/anomalies des oreilles ext et int/utérus hypoplasique	16A3457 que le variant expliquait bien le phénotype. Ellee st perdue de vue depuis 2018 et il était prévu une scolarisation en CP avec AVS
A faire				relance Tran-Mau-Them car ce patient a disparu des mails de Dijon	Forme sévère		faut-il relancer ou ces infos suffisent ?		Forme très modérée			Forme très modérée	Il vient de me renvoyer encore plus court comme info, il dit simplement "surdité pfde bilat avec Di légère" le 23/01
							Je pense que besoin de relancer, il faudrait plus d'info sur la DI et la dysmorphie. où le patient en est acctuellement?		Ne marche pas à quel age? bien parti pour Sévère	dysmorphie?	dysmorphie? le patient en est où actuellement? Ca a l'air bien parti pour mild	plus grand=> pas un cas classique	Une idée de la DI? J'aurais dit sévère non?	Scolarisation en CP avec AVS, cela fait penser à un mild. Il doit marcher avec un minmum d'intellligence, pouvoir interagir avec ses pairs.

## Sheet: Feuil1
Code	Episignature class	Phenotypic class (moderate, severe)	Age at sampling (in days or months)	Age at clinical diagnosis	if deceased, age at death (in days, months or years)	Sex	Mutation NM_017780.4	NP_060250.2	ACMG variant classification	inheritance	hypotonia	developmental delay	speech delay	intellectual disability (severe, moderate, mild)	autistic features	eyes abnomalities	brain MRI (if abnormal, please detailled)	congenital heart defect	Choanal atresia	gastrointestinal defect	genitalia abnormalities	typical facial CHARGE dysmorphism	Inner ear abnormality/ hearing loss	External ear malformation/ cup-shaped ears	growth retardation	growth retardation
ST6	epi-strong	severe	2 days	J2	J9	F	c.4353+1 G>A	p.?	5	de novo	NA	NA	NA	NA	NA	NA	pontocerebellar hypoplasia, facial nerve agenesis,	atent ductus arteriosus, Atrial septal defect, atrioventricular asymmetry	yes	no	no	yes	yes	yes	no	no
ST7	epi-strong	severe	17 days	J17	na	M	c.481 C>T	p.Gln161*	5	de novo	yes	severe	yes	NA	NA	coloboma	cerebellar hypoplasia	atrio ventricular defect	yes	horse kidneys	no	yes	yes	yes	-2	-2
ST8	epi-strong	severe	24 days	J24	J37	M	c.1223del	p.Thr408IleFs*55	5	de novo	no	NA	NA	NA	NA	coloboma	cerebellar dysplasia	inter ventricular defect, transposition of the great vessels	no	no	no	yes	yes	yes	NA	na
CHARGE_4	epi-strong	severe	18 days	3m		F	c.469C>T	p.(Arg157*)	5	NA	Axial and peripheral hypotony	Walking at 3 years old	3 years: communicative but not audible (but profound deafness)	Too young for IQ tests	no	hyperopia	fairly thin corpus callosum, left ventricular dilatation	ductus arteriosus widely open, perimembranous IVC with a minimally restrictive left-right shunt, wide CIA	No	5 months: poor food intake, significant faltering and regurgitation after each meal. GERD confirmed by TOGD. Normal abdominal ultrasound. Enteral feeding on SNG almost exclusively. Gastrostomy placement subsequently	not reported	facial dysmetria may be present	Profound deafness on the right, severe on the left; fitted	Dysplastic ears (small, no lobules, poorly shaped)	Stature << -3DS	P <1er p ; T << -3DS
CHARGE_6	epi-strong	severe	10 days	1m		M	c.3655C>T	p.(Arg1219*)	5	de novo	NA	Yes	-	normal ID	NA	Right unilateral papillary coloboma and amblyopia	Agnesia of the olfactory bubbles and olfactory furrows associated with a mega cistern, agnesia of the semicircular canals	Left superior vena cava draining into a dilated coronary sinus	bilateral membranous choanal atresia	severe swallowing disorder requiring tracheotomy	hypoplastic genitals	NA	bilateral profound deafness; semicircular canal agnesia	asymmetrical ears, little square pinna and triangular conches	yes, -2DS	oui, -2DS
CHARGE_10	epi-strong	Clinical information is limited, and the patient is no longer under follow-up.	22 days			F	c.2959C>T	p.(Arg987*)	5	NA	NA	NA	NA	NA	NA	NA	NA	NA	NA	NA	NA	NA	NA	NA	NA
CHARGE_7	epi-strong*	Moderate	12 months			F	c.6850C>T	p.(Arg2284*)	5	NA	NA	yes, quite severe	Yes	too young	NA	NA	NA	Coarctation aorta, CA, large interatrial septal defect, surgery 2 months	NA	NA	horseshoe kidney	NA	Yes	NA	yes, -2.5	oui, -2,5
CHARGE_8	epi-strong*	severe	7 months	15 months		F	c.7252C>T	p.(Arg2418*)	5	not maternal	y	y	y	severe	no	no	yes right posterior cortical dysplasia	yes large CIA	no	no	no	? Not obvious	yes, left side, severe	yes	yes -3ds	yes -3ds
CHARGE_1	epi-mild	mild	12 months	2,5y		F	c.2504_2508del	p.(Tyr835Serfs*14)	5	de novo	No	No	No	normal ID	no	left papillary coloboma, residual acuity less than 1/10th	normal	No	No	No	No	NA	bilateral deafness/left eardrum retraction	small round ears	yes -2DS	oui -2DS
CHARGE_2	epi-mild	severe	8 months	4 months		M	c.963dup	p.(Leu322Ilefs*3)	5	de novo	axial hypotonia (from birth)	yes	Yes	severe	no	coloboma	Brain MRI: septal agenesis.	Ebstein's disease of	with small right ventricle	Gastrostomy until 3 years of age due to oral disorder, normal feeding at 5 years of age.	Malrotation on incomplete common mesentery	Flat nose, small ears, low set, dysplastic	Cochlear implant on the right	Probable bilateral deep sweat	yes	yes
CHARGE_3	epi-mild	mild	9 years	9 years		M	c.5405G>A	p.(Gly1802Asp)	4	not maternal	no	yes	yes	mild	no	coloboma, amblyopia	abnormal: Multiple round supratentorial lesions in T2 hyposignal suggestive of multiple cavernomas	aortic arch pathology, Stenosis of the left pulmoanal artery	no	no	delayed puberty: G1 P2 A1 with an estimated testicular volume between 1 and 2 ml, i.e. hypotrophic	There are oblique, outwardly sloping palpebral clefts, slight facial asymmetry, thick eyebrows, small, round, very hemmed, low-set ears, a narrow palate, a flat tip of the nose and a rather elongated face.	Bilateral tympanosclerosis, with bilateral agenesis of the semicircular canals. There is atresia of the cochlear opening on the left. Left middle deafness	small, round, deeply hemmed, low-set ears	no	no
CHARGE_5	epi-mild	mild	18 months	2y		M	c.5301-14A>G	p.?	5	de novo	No	No	No	normal ID	NA	No	normal	No	No	No	No	square face and facial asymmetrya, wide nose bridge, no dental anomalies, no mouth anomalies	unilateral left sensorineural deafness / hypoplasia of the left cochlear nerve canal + bilateral posterior labyrinthine malformation with almost complete agnesia of the semicircular canals.	Yes	No	non
CHARGE_9	epi-mild	Moderate/mild	25 years	26y		F	c.2219A>G	p.(Asp740Gly)	4	NA	NA	y	y	mild	no	no	NA	no	no	no	noo	no	yes/yes deep bilateral	Yes	1m55 & 70kg	1m55/70kg
CHARGE_11	epi-mild	Mild	3 years			F	c.7123del	p.(Ser2375Valfs*68)	5	NA	NA	NA	NA	NA	NA	NA	NA	NA	NA	NA	NA	NA	NA	NA	NA
