# Supplementary material for: Identification of an episignature for CHD3-related Snijders Blok-Campeau syndrome reveals heterogeneity in the CHARGE syndrome episignature: towards a better characterization of chromatinopathies.
Source: Research Square preprint supplement (doi:10.21203/rs.3.rs-6706576/v1), 2025-05-26
Supplement: Supplementary file 4 [file 6048e987b02f56bd62d22bb5.xlsx]

## Sheet: From OMIM & literature
		CHD3	CHD7	CHD8
neurologic findings	developmental delay	yes	yes	yes
	speech delay	yes	yes	nr
	intellectual disability	yes	yes	yes
	autistic features	sometimes	yes	yes	nr= not reported
	seizure	sometimes	sometimes	sometimes
	happy demeanor	rarely	no	nr
	visual anomalies	yes	yes	nr
	sleep disturbance	nr	nr	yes
dysmorphism	facial dysmorphism	yes	yes	nr
	prominent forehead	sometimes	no	nr
	hypertelorism	yes	yes	nr
	deep-set eyes	rarely	no	nr
	cup-shaped ears	no	yes	no
Skeletal	macrocephaly	yes	no	yes
	microcephaly	rarely	yes	no
	overgrowth	yes?	no	yes
	reduced growth	rarely	yes	no
	joint laxity	sometimes	sometimes	nr
	hypotonia	yes	yes	sometimes
	scoliosis	sometimes	yes	nr
Heart	congenital heart issues	rarely	yes	nr
	genital abnormalities	rarely	yes	nr
	gastrointestinal problems	rarely	sometimes	yes

## Sheet: From MONDO
category	CHD3	CHD8	CHD7
nervous_system	19	15	33
head_neck	17	11	71
musculature	10	3	37
skeletal_system	7	2	30
digestive_system	7	4	24
eye	5	2	22
connective_tissue	4		4
integument	1		6
ear	1	1	16
growth		2	6
genitourinary_system			22
endocrine			12
respiratory			5
blood			4
prenatal_or_birth			4
immune_system			3
metabolism_homeostasis			1
