# Supplementary material for: Identification of an episignature for CHD3-related Snijders Blok-Campeau syndrome reveals heterogeneity in the CHARGE syndrome episignature: towards a better characterization of chromatinopathies.
Source: Research Square preprint supplement (doi:10.21203/rs.3.rs-6706576/v1), 2025-05-26
Supplement: Supplementary file 5 [file 82d24bf897aa08c3c4c23e00.docx]

Santini et al. 2025 Additional information

*Atypical patients*

*ST78*

ST78 is a 9-year-old girl carrying a de novo missense probably? pathogenic variants (*NM_001005273.3:c.3515G>A, R1172Q*). The parents are first cousins with several poly-malformative cases in the family. The pregnancy was unremarkable. At birth, she exhibited craniosysnostosis and respiratory distress. At 3 months, clinical examination reported a protruding forehead, non-palpable fontanelles with raised structures and downward and outward slanting palpebral fissures, a small chin, long fingers and thin lips, an anterior anus and general hypotonia (**Supplemental Figure 1**). At 8 years old, she was able to make sentences but could not recognise all the letters, she was not able to eat by herself and was taken in charge in a specific school. The initial genomic characterisation found large regions of homozygosity with the abundance of missense variants of moderate impact due to the close relationship of the parents, notably in genes DOCK8, LAMA1, MMP12, POMT1, TRAP1, among others. Whole-genome sequencing performed at age 8 revealed a de novo heterozygous pathogenic variant on the *CHD3* gene.

*ST56*

ST56 is a 13-year-old girl born after a pregnancy marked by an increased nuchal translucency, coarctation of the aorta, and left ventricular asymmetry. ST56 was born with coarctation of the aorta and an increased occipitofrontal circumference (OFC 36.5 cm, +2.04 SD). At her most recent examination, she continued to display macrocephaly (OFC 57.5 cm; +2.50 SD). No intellectual disability was reported, although she demonstrated heterogeneous scores on WISC-V testing (Visual-Spatial Index: 72, Verbal Comprehension Index: 87, Fluid Reasoning Index: 85, Working Memory Index: 81, Processing Speed Index: 98), and was diagnosed with Attention-Deficit/Hyperactivity Disorder (ADHD) treated with methylphenidate. Facial dysmorphism was noted (**Supplemental Figure 1**), including a short soft palate with rhinolalia. ST56 pursued special education. Heart malformations remain a significant concern, requiring further surgical intervention in the future. At 14 years of age, a heterozygous de novo missense variant of the CHD3 gene was identified by trio whole-genome sequencing (NM_001005273.3:c.2302A>G, p.(Thr768Ala).

*ST80*

ST80 is an 18-year-old girl carrying a de novo silent variant in the last base of exon 38 possibly affecting the splicing site (NM_001005273.3:c.5754G>A, P1918=; reported to be pathogenic on the [dbscSNV](https://sites.google.com/site/jpopgen/dbNSFP) database, <https://www.dbnsfp.org/home> ). The pregnancy was uneventful, with normal birth weight and length. The facial features reported are a prominent nasal tip and a synophrys without any other particularities reminding of the Block Campeau syndrome, with additional fetal pads, clinodactyly of the 5th fingers, hirsutism (possibly ethnic) and a small size at last examination (-2.24 SD). The patient exhibits a digestive malabsorption disease and an irritable bowel syndrome.
