# Supplementary material for: Identification of an episignature for CHD3-related Snijders Blok-Campeau syndrome reveals heterogeneity in the CHARGE syndrome episignature: towards a better characterization of chromatinopathies.
Source: Research Square preprint supplement (doi:10.21203/rs.3.rs-6706576/v1), 2025-05-26
Supplement: Supplementary file 6 [file ddb06d6b2a77aaffc8cc3ce2.xlsx]

## Sheet: Feuille 1
Biological Process	Gene Count	Adjusted p-value
Intracellular receptor signaling pathway	47	0.005
Immune response-activating signaling pathway	45	0.014
Innate immune response-activating signaling pathway	37	0.016
Positive regulation of innate immune response	35	0.017
Intrinsic apoptotic signaling pathway	34	0.018
Regulation of apoptotic signaling pathway	33	0.019
Regulation of innate immune response	31	0.02
Regulation of mRNA 3'-end processing	5	0.025
