# Supplementary material for: Identification of an episignature for CHD3-related Snijders Blok-Campeau syndrome reveals heterogeneity in the CHARGE syndrome episignature: towards a better characterization of chromatinopathies.
Source: Research Square preprint supplement (doi:10.21203/rs.3.rs-6706576/v1), 2025-05-26
Supplement: Supplementary file 7 [file e3c128479b720637af903e01.xlsx]

## Sheet: liste_de_sondes_pour_chaque_sig
AUTS18/CHD8_1 (Siu et al, 2019)	AUTS18/CHD8_2 (Aref-Eshghi, 2020)	CHARGE/CHD7_1 (Butcher et al, 2017)	CHARGE/CHD7_2 (Aref-Eshghi, 2020)
cg00492070	cg09313122	cg04863892	cg22987448
cg26841068	cg03318695	cg25942940	cg07520269
cg26201213	cg22987448	cg14853974	cg05465935
cg17341345	cg03997039	cg11096515	cg05499178
cg05846166	cg00748494	cg20474425	cg20860188
cg24181914	cg24263062	cg06906435	cg17713912
cg02553054	cg22284448	cg04053108	cg04863892
cg00806311	cg25540032	cg02646423	cg25942940
cg00913360	cg08450021	cg25037165	cg14853974
cg01252496	cg01462607	cg11321156	cg11096515
cg01477861	cg25741609	cg16923485	cg20474425
cg01963623	cg16268165	cg12806882	cg08070327
cg02674474	cg11342941	cg08941355	cg06906435
cg03315230	cg02064724	cg11857140	cg14058329
cg04089788	cg14535531	cg15161959	cg23204968
cg04840702	cg26939277	cg16787483	cg22512830
cg06161930	cg03049767	cg02211646	cg04053108
cg06615754	cg26201213	cg11758841	cg02646423
cg06648759	cg03507326	cg03906434	cg23677291
cg08463024	cg04406111	cg14179389	cg25037165
cg09169617	cg04255230	cg00048370	cg25506432
cg09454892	cg02104138	cg17461600	cg14013695
cg10636297	cg14651183	cg16915863	cg10651121
cg11917542	cg12477880	cg20706134	cg05226008
cg12406027	cg08586737	cg27306802	cg11321156
cg12439325	cg09737421	cg17785202	cg05167916
cg12718440	cg17341345	cg17434008	cg23364711
cg13028113	cg07570687	cg12051819	cg16923485
cg15475323	cg05846166	cg11939496	cg27536286
cg20092736	cg10600889	cg08550523	cg12806882
cg21747160	cg12649455	cg10827754	cg08941355
cg22445712	cg03993109	cg00428457	cg04635635
cg22670819	cg15975750	cg16058600	cg17686487
cg23525596	cg00339913	cg21758126	cg11857140
cg24950222	cg07978099	cg17654050	cg09305883
cg25612391	cg07537562	cg03351487	cg06602723
cg25821785	cg13903421	cg18141622	cg20592075
cg25937577	cg26602314	cg26768584	cg18951332
cg27206976	cg17016026	cg14312439	cg06728970
cg27295642	cg05072008	cg11377213	cg03003919
cg27364650	cg11596009	cg23333146	cg15161959
cg27478579	cg24181914	cg21090457	cg25730122
cg27584762	cg27601964	cg00511167	cg19719409
cg03079640	cg06768599	cg11341144	cg04507071
cg03162823	cg11853697	cg00828556	cg08503681
cg04661001	cg21482472	cg24492202	cg06130322
cg05815196	cg03327263	cg17791799	cg20710519
cg07129669	cg06618047	cg15297220	cg08380478
cg10088460	cg11029716	cg07318204	cg24796998
cg10989517	cg06965195	cg04392082	cg27631817
cg12106855	cg19014623	cg27606341	cg16787483
cg13905238	cg19251564	cg24549912	cg02000318
cg14328676	cg21968765	cg23111488	cg19543968
cg14686645	cg00260937	cg15699693	cg15325961
cg17382939	cg26211724	cg14746387	cg01663825
cg18699242	cg23924370	cg03187073	cg08115371
cg21760990	cg10593816	cg16804603	cg02211646
cg22946066	cg08777316	cg17615629	cg27084781
cg25881170	cg14859324	cg07333021	cg15355952
cg26688574	cg10197263	cg26033526	cg13569424
cg00381684	cg24856673	cg22011526	cg13245264
cg00536792	cg07669403	cg18477569	cg02974204
cg00951302	cg23515411	cg26673377	cg18178840
cg01140985	cg00765128	cg08319974	cg11758841
cg01757168	cg18742814	cg22321572	cg18161956
cg03680291	cg08121453	cg06684088	cg21980394
cg03710889	cg05848884	cg26136772	cg10308749
cg07421596	cg03060590	cg20071624	cg03906434
cg07520269	cg03951603	cg23865240	cg19223521
cg08118344	cg02553054	cg07659054	cg10273821
cg08771019	cg10650290	cg18805066	cg14179389
cg10134527	cg25904183	cg22154659	cg00350158
cg13699479	cg08703337	cg07278425	cg08335389
cg14322224	cg05361406	cg00106345	cg01383287
cg21105955	cg21951729	cg17485838	cg09549073
cg23120942	cg16966496	cg26264232	cg26229043
cg24657523	cg15721584	cg08657654	cg00048370
cg26005232	cg17338133	cg11724970	cg17989763
cg27165794	cg19447221	cg05076221	cg27079740
cg00039057	cg14782678	cg02248486	cg01709518
cg00278366	cg13663644	cg25866143	cg25801742
cg01020079	cg14340463	cg01370449	cg03352173
cg03917138	cg13447818	cg19759481	cg18589102
cg04548815	cg02288819	cg12128839	cg09319828
cg05867134	cg01073463	cg02916332	cg08755703
cg05970811	cg14824766	cg17569124	cg09361691
cg06634460	cg05858126	cg02005600	cg03934681
cg07245868	cg15585294	cg25307665	cg12291059
cg09238801	cg27217167	cg14014955	cg17461600
cg09819656	cg26561943	cg20517050	cg22731513
cg10376053	cg22501388	cg26023912	cg09404376
cg11267669	cg23268783	cg14882265	cg09600715
cg11741004	cg17384889	cg17432857	cg16171484
cg12324629	cg22490229	cg23129930	cg23104439
cg12748890	cg08290471	cg06237983	cg08401657
cg13560436	cg27158462	cg03529432	cg27112993
cg14288848	cg20128365	cg22469274	cg22226821
cg14845962	cg08928145	cg17994139	cg10806197
cg15660077	cg15458222	cg14044640	cg11630632
cg17192377	cg00688297	cg19816811	cg04229930
cg19602315	cg01736243	cg06218338	cg10299976
cg20457147	cg09251362	cg27405731	cg12399536
cg21408915	cg03027241	cg18546840	cg16142488
cg23919433		cg24786986	cg14696334
cg24631162		cg18871253	cg02973961
cg26646118		cg12858593	cg15841205
cg27416261		cg05575639	cg21929875
cg01834979		cg05976283	cg10949113
cg03000593		cg11284147	cg19570154
cg03433986		cg01746241	cg09674170
cg03453449		cg13932501	cg20815778
cg03750567		cg14422498	cg14212966
cg05501320		cg09517766	cg08207154
cg09851528		cg13404688	cg17104824
cg10040530		cg12691572	cg16362934
cg10775991		cg07053114	cg13178766
cg10848724		cg25598685	cg07629125
cg11069430		cg22111527	cg07593523
cg11213690		cg17222829	cg08756640
cg11697038		cg19981409	cg08985968
cg12234455		cg03056494	cg09096031
cg13182599		cg25607216	cg03814093
cg13942186		cg22222281	cg05210671
cg14096569		cg23590660	cg26924747
cg17665699		cg25285743	cg13805001
cg18144560		cg12115302	cg23849826
cg19724470		cg22679316	cg13775636
cg19887750		cg12707346	cg06875131
cg20417500		cg17301248	cg16522260
cg21345949		cg25556579	cg11316517
cg23004625		cg09203312	cg00705992
cg25293806		cg12166476	cg23511824
cg25762706		cg26168643	cg25972787
cg27261219		cg24626752	cg05726274
cg01225565		cg09823859	cg04024827
cg02147797		cg05757365	cg16915863
cg03278643		cg17376609	cg18774642
cg03484180		cg00525681	cg15082824
cg03677069		cg02611934	cg21906947
cg03717584		cg08959039	cg01795776
cg04755771		cg23998119	cg20706134
cg05962511		cg14345154	cg24750308
cg06806080		cg16278496	cg14424631
cg07038187		cg17904575	cg18664965
cg07890553		cg14191466	cg11964314
cg07993743		cg05492904	cg23930311
cg10537821		cg23054181	cg05210501
cg10599571		cg24595580	cg26130053
cg10999598		cg10228555
cg11117460		cg03308839
cg12244647		cg06911613
cg12308054		cg01565508
cg14125353		cg25356504
cg14386691		cg14272075
cg14485633		cg15648345
cg15175162		cg25140190
cg16636110		cg23679819
cg16665444		cg20811236
cg16694639		cg12122241
cg19202014		cg23720384
cg21209395		cg24168308
cg21769969		cg18274664
cg25970491		cg22076474
cg26629730
cg00091633
cg00880984
cg00979931
cg01961153
cg02087454
cg03387723
cg03434624
cg05243389
cg05820241
cg05845403
cg05891849
cg06500079
cg07109801
cg07207043
cg07895437
cg08143875
cg08216808
cg08373610
cg08666956
cg08929303
cg11489251
cg11599830
cg11699265
cg12184221
cg12193657
cg12979844
cg13771313
cg14565151
cg15089111
cg15452204
cg17055704
cg18364502
cg18893793
cg19617897
cg19793809
cg21179831
cg21291449
cg21306775
cg22778145
cg23695990
cg26619624
cg27214378
cg00105512
cg00576075
cg01804429
cg02723291
cg03736781
cg04993130
cg05812266
cg05925894
cg06382559
cg06513695
cg07207490
cg07417745
cg09546802
cg09711113
cg12652585
cg13202221
cg14160968
cg14219900
cg14230606
cg16151651
cg18046677
cg18876602
cg19179572
cg19334452
cg19514469
cg19801120
cg20721320
cg21518299
cg22510139
cg23047271
cg23397023
cg24664957
cg24728542
cg25213362
cg25658983
cg25954512
cg26893699
cg00857137
cg01060471
cg01060964
cg01274660
cg01560676
cg02634341
cg02654291
cg03566479
cg03971454
cg04042248
cg04078118
cg04768368
cg06303238
cg06396119
cg06485521
cg06675483
cg06707970
cg07448319
cg08352755
cg08436089
cg09570614
cg09571713
cg09645336
cg10626063
cg10997906
cg12283398
cg14103343
cg14518658
cg14741691
cg15090036
cg15365218
cg15442037
cg16024916
cg17242664
cg19401033
cg19739906
cg21012874
cg23376861
cg23526586
cg24687970
cg24907270
cg24959134
cg25400396
cg27281093
cg27461259
cg00062245
cg00652772
cg01695406
cg01721313
cg02006647
cg02487233
cg02965178
cg05077231
cg05198819
cg05465935
cg05920383
cg06693983
cg06825512
cg07022591
cg07104958
cg08870143
cg09092525
cg09390350
cg09568217
cg09684846
cg09772075
cg09871637
cg10436410
cg10767045
cg11071193
cg12287936
cg13791092
cg14399930
cg14557202
cg15001381
cg15169829
cg16467811
cg16624888
cg17055821
cg17594670
cg18852096
cg20000805
cg21363811
cg21401642
cg25786696
cg26493224
cg26950867
cg27248148
cg00691240
cg00729875
cg02017534
cg02841199
cg03658578
cg05301470
cg06294700
cg06889971
cg07038400
cg07928883
cg08530838
cg08719380
cg09499421
cg09560161
cg09970023
cg10119082
cg10428938
cg10446869
cg10730435
cg12561497
cg12629244
cg13320683
cg14307853
cg14454477
cg14473643
cg14809332
cg15825059
cg17261125
cg17657179
cg18383668
cg19264571
cg19916659
cg21050001
cg21531689
cg21583668
cg22950598
cg25017060
cg26717563
cg00181432
cg00206639
cg00246121
cg00641210
cg01427957
cg01930676
cg01969701
cg02159271
cg02564523
cg02630888
cg02856402
cg03826642
cg04004904
cg04440885
cg04606020
cg04664161
cg05079544
cg05250932
cg05499178
cg06060835
cg06789445
cg06957790
cg07263322
cg07716847
cg07960762
cg08047939
cg11025974
cg12598235
cg12902206
cg12980795
cg13058710
cg13840445
cg14457311
cg16661269
cg17328665
cg17835016
cg18369516
cg18509185
cg19313402
cg19871388
cg20343048
cg21382923
cg22935653
cg23678254
cg24124954
cg24295653
cg24392955
cg24460126
cg24912415
cg25220979
cg25749107
cg25788719
cg26885268
